# Supplementary material for: A small molecule exerts selective antiviral activity by targeting the human cytomegalovirus nuclear egress complex
Source: PubMed Central journal article supplement (PMC10691697; doi:10.1371/journal.ppat.1011781), 2023-11-17
Supplement: ppat.1011781.s004.pdf [file ppat.1011781.s004.pdf]

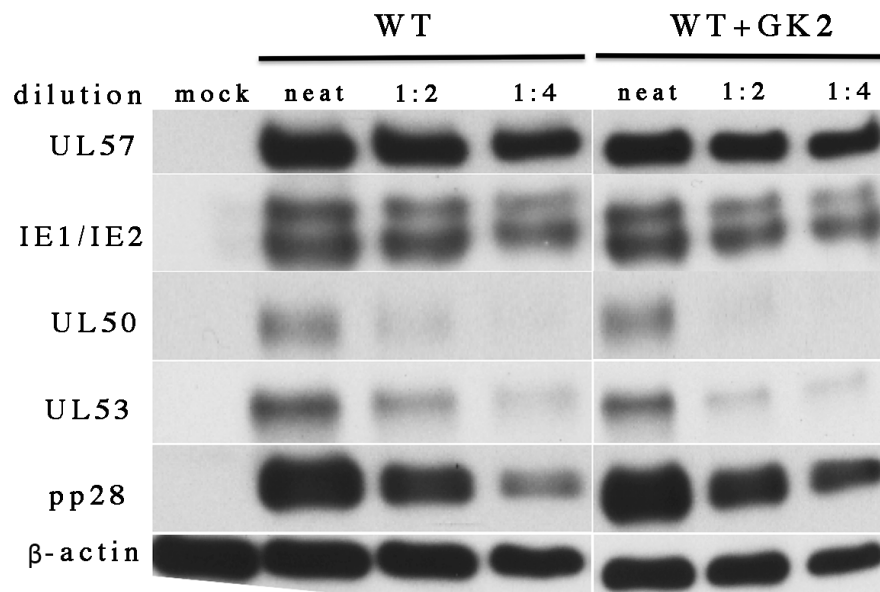

**S4 Fig. Effect of GK2 on HCMV protein expression in infected cells.** HFF cells were mock infected or infected with WT HCMV at an MOI of 1. Following absorption, medium containing either DMSO or 10  $\mu$ M GK2 was added. At 72 hpi, cells were lysed, proteins resolved using SDS-PAGE, and the expression of the viral proteins indicated to the left was assessed by immunoblotting. Similar results were obtained in a second independent experiment.
