# Supplementary material for: A small molecule exerts selective antiviral activity by targeting the human cytomegalovirus nuclear egress complex
Source: PubMed Central journal article supplement (PMC10691697; doi:10.1371/journal.ppat.1011781), 2023-11-17
Supplement: ppat.1011781.s006.pdf [file ppat.1011781.s006.pdf]

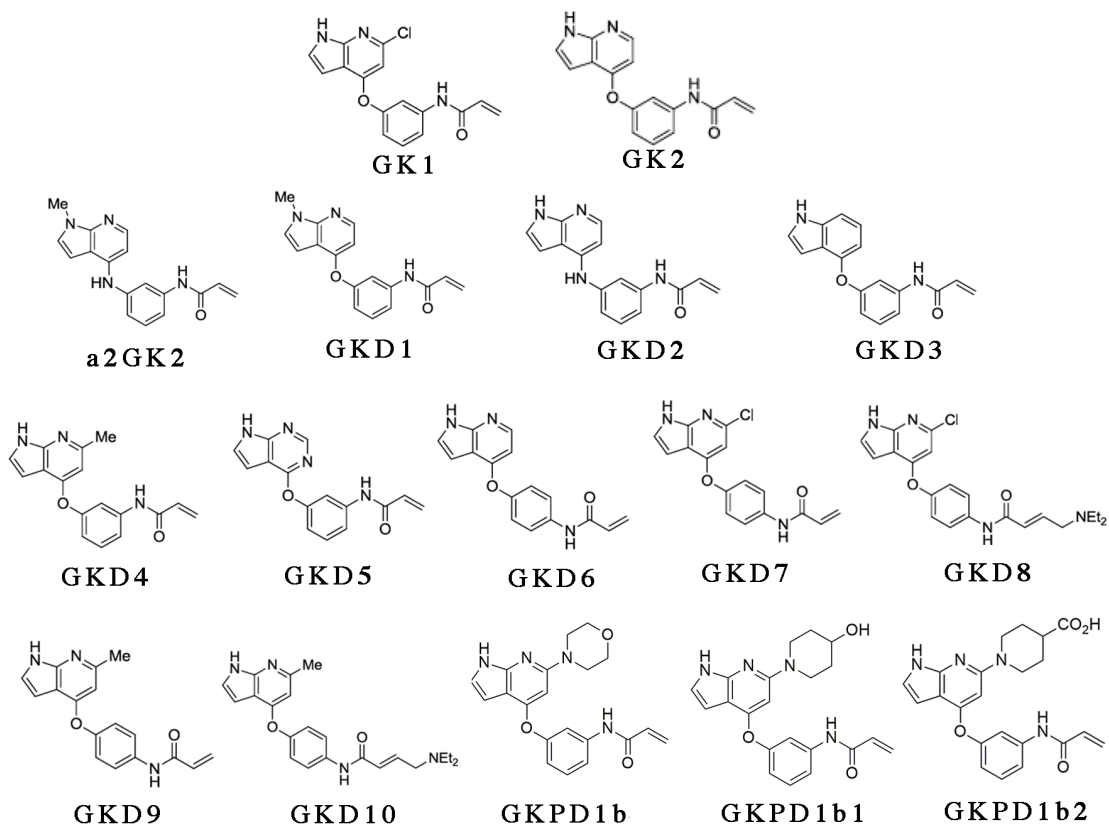

**S6 Fig. The chemical structures of analogs of GK1 and GK2**
