# Supplementary material for: A small molecule exerts selective antiviral activity by targeting the human cytomegalovirus nuclear egress complex
Source: PubMed Central journal article supplement (PMC10691697; doi:10.1371/journal.ppat.1011781), 2023-11-17
Supplement: ppat.1011781.s011.pdf [file ppat.1011781.s011.pdf]

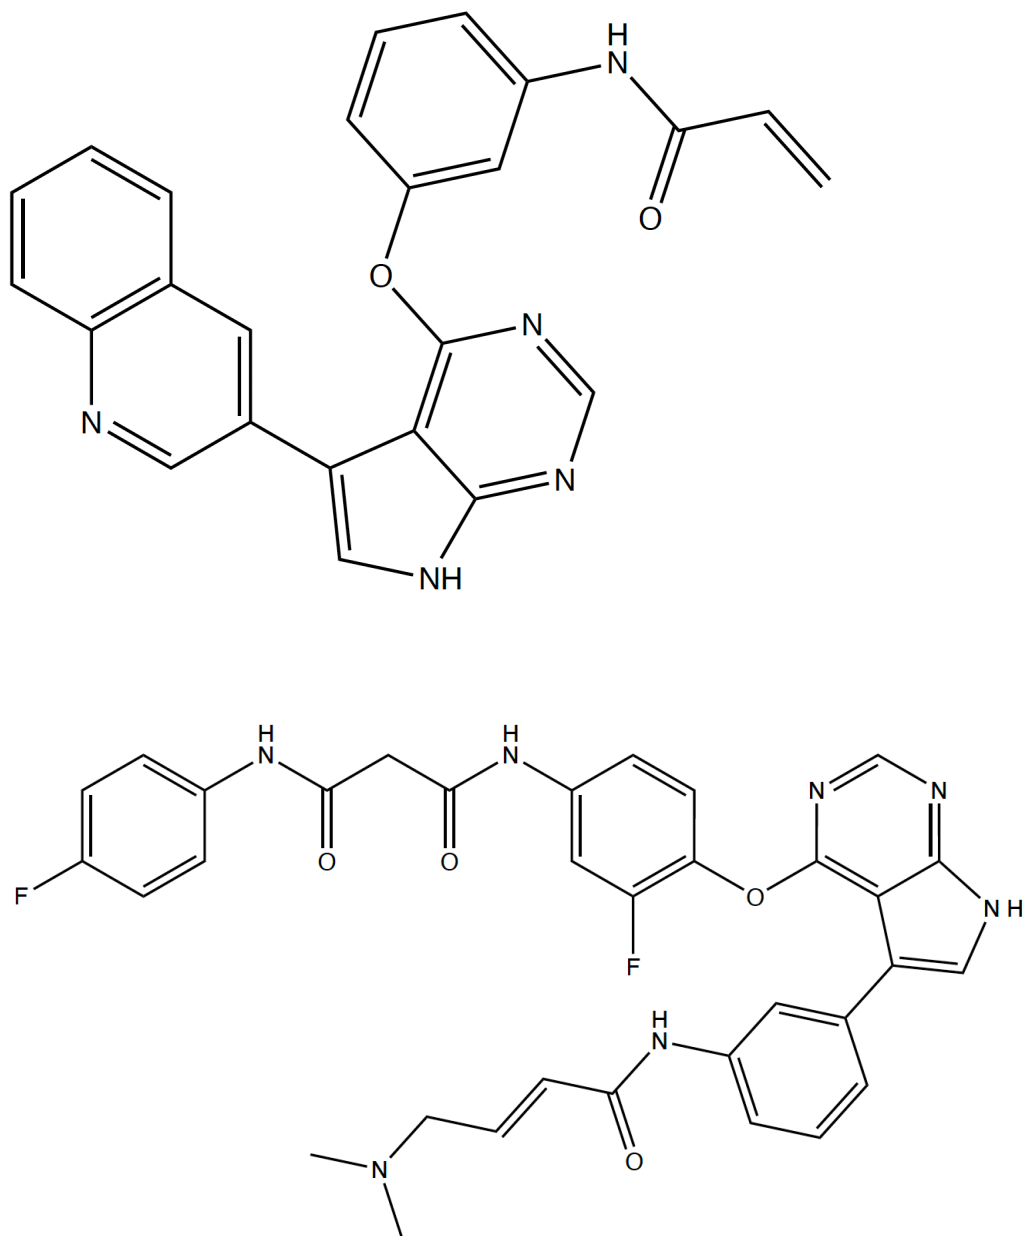

**S11 Fig.** Structures of two compounds containing a scaffold similar to GK1's that did not score as hits.
