# Supplementary material for: A small molecule exerts selective antiviral activity by targeting the human cytomegalovirus nuclear egress complex
Source: PubMed Central journal article supplement (PMC10691697; doi:10.1371/journal.ppat.1011781), 2023-11-17
Supplement: ppat.1011781.s012.pdf [file ppat.1011781.s012.pdf]

**S1 Table**

| Plate                   | 1A           | 1B    | 2A         | 2B    |
|-------------------------|--------------|-------|------------|-------|
| <b>Experimental</b>     |              |       |            |       |
| Library                 | Microsource1 |       | Prestwick2 |       |
| Reagent Vendor          | Microsource  |       | Prestwick  |       |
| Compound                | Merbromin    |       |            |       |
| HTRF Channel 1 (665 nm) | 14121        | 14512 | 5412       | 5397  |
| HTRF Channel 2 (620 nm) | 3705         | 3793  | 4560       | 4809  |
| HTRF Ratio              | 38113        | 38260 | 11868      | 11223 |
| <b>Positive Control</b> |              |       |            |       |
| HTRF Channel 1 (665 nm) | 6220         | 6335  | 6555       | 6402  |
| HTRF Channel 2 (620 nm) | 10279        | 10489 | 11279      | 11045 |
| HTRF Ratio              | 6053         | 6041  | 5810       | 5799  |
| <b>Negative Control</b> |              |       |            |       |
| HTRF Channel 1 (665 nm) | 15982        | 16932 | 7941       | 7684  |
| HTRF Channel 2 (620 nm) | 7061         | 6958  | 8541       | 8544  |
| HTRF Ratio              | 22713        | 24373 | 9195       | 8997  |

**S1 Table. HTRF ratio and FRET emissions for Merbromin-treated HCMV NEC.**

Of the libraries screened, two included the compound merbromin. Screening of the NEC was performed in duplicate (i.e. Plates 1A and 1B) for each library and positive and negative controls were included on each plate. FRET emissions from the acceptor were measured at 665 nm (Channel 1) and donor emissions at 620 nm (Channel 2). The HTRF ratio was calculated as follows:

$$[(\text{Abs}_{665\text{nm}}/\text{Abs}_{620\text{nm}})*10,000].$$
