# Supplementary material for: A small molecule exerts selective antiviral activity by targeting the human cytomegalovirus nuclear egress complex
Source: PubMed Central journal article supplement (PMC10691697; doi:10.1371/journal.ppat.1011781), 2023-11-17
Supplement: ppat.1011781.s013.pdf [file ppat.1011781.s013.pdf]

**S2 Table.  $K_d$  values for the interactions of UL50 mutants with UL53 and UL53 mutants with UL50.**

|                   | $K_d$ ( $\mu\text{M}$ ) |
|-------------------|-------------------------|
| UL50 - UL53       | $0.30 \pm 0.12^1$       |
| UL50_C54S – UL53  | $0.24 \pm 0.14$         |
| UL50_C35N – UL53  | $0.15 \pm 0.06$         |
| UL50_C79S – UL53  | $0.34 \pm 0.15$         |
| UL50 – UL53_C214S | $0.13 \pm 0.01$         |
| UL50 – UL53_C159S | $0.18 \pm 0.02$         |
| UL50 – UL53_C288S | $0.32 \pm 0.10$         |

<sup>1</sup> Error bars represent standard deviations from two independent experiments.
