# Supplementary material for: A small molecule exerts selective antiviral activity by targeting the human cytomegalovirus nuclear egress complex
Source: PubMed Central journal article supplement (PMC10691697; doi:10.1371/journal.ppat.1011781), 2023-11-17
Supplement: ppat.1011781.s014.pdf [file ppat.1011781.s014.pdf]

**S3 Table Summary of the inhibitory activities of the analogs of GK1 and GK2 in HTRF assays and their antiviral activities and cytotoxicity**

| Compound             | HTRF assay            | Antiviral activity and cytotoxicity |                       |                                    |
|----------------------|-----------------------|-------------------------------------|-----------------------|------------------------------------|
|                      | IC <sub>50</sub> (μM) | ED <sub>50</sub> (μM)               | CC <sub>50</sub> (μM) | CC <sub>50</sub> /ED <sub>50</sub> |
| GK1                  | 5.3                   | 0.83                                | 22                    | 27                                 |
| GK2                  | 21                    | 3.9                                 | 21                    | 5.4                                |
| a2GK2                | >50                   | 2.2                                 | 9.3                   | 4.2                                |
| GKD1                 | 16.6                  | 16                                  | 14                    | 0.9                                |
| GKD2<br>(free amine) | >50                   | 5.8                                 | 14                    | 2.4                                |
| GKD3                 | 9.9                   | 17.5                                | 50                    | 3                                  |
| GKD4                 | 9.9                   | 2.1                                 | 25                    | 12                                 |
| GKD5                 | >50                   | 18                                  | 45                    | 2.5                                |
| GKD6                 | 17                    | 1.8                                 | 33                    | 18                                 |
| GKD7                 | >50                   | 16                                  | 38                    | 2.4                                |
| GKD8                 | >50                   | 2                                   | 10                    | 5                                  |
| GKD9                 | 27                    | 1.4                                 | 47                    | 34                                 |
| GKD10                | >50                   | 2                                   | 12                    | 6                                  |
| GKPD1                | >50                   | >50                                 | >50                   |                                    |
| GKPD1b1              | 50                    | 22                                  | >50                   |                                    |
| GKPD1b2              | 50                    | >50                                 | >50                   |                                    |
