# Supplementary material for: A small molecule exerts selective antiviral activity by targeting the human cytomegalovirus nuclear egress complex
Source: PubMed Central journal article supplement (PMC10691697; doi:10.1371/journal.ppat.1011781), 2023-11-17
Supplement: ppat.1011781.s016.pdf [file ppat.1011781.s016.pdf]

**S5 Table List of primers used in this study**

| <b>Construct</b>                                   | <b>Forward primers</b>                                                                                       | <b>Reverse Primers</b>                                                                           |
|----------------------------------------------------|--------------------------------------------------------------------------------------------------------------|--------------------------------------------------------------------------------------------------|
| UL50_C35N                                          | 5'CGGCCTCATCAATAAAAACC<br>CCAATTACTCGGTGTGC 3'                                                               | 5' GCATCGGTGACGCGCAGC<br>3'                                                                      |
| UL50_C54S                                          | 5'CACGGTCTATAGTGTGAGT<br>ATC 3'                                                                              | 5' TCTGTCTTGAGCATGGCG                                                                            |
| UL50_C79S                                          | 5' AAACACTGGCTCCGCCGT<br>CTCCC 3'                                                                            | 5' TTAAAGATAAAAACAA<br>GGCACGTGGTCTG 3'                                                          |
| UL53_C214S                                         | 5' GCACATCCCAGCGACTGC<br>ATCACG 3'                                                                           | 5' ACGTCGGGGTTTTCGAAG<br>ATGAC 3'                                                                |
| UL53_C159S                                         | 5' TTACGGGTTTCAGTAAG<br>AGCAGCGAG 3'                                                                         | 5' TAAAAGTTTCTATTTTT<br>CATGATGTTGGACG 3'                                                        |
| UL53_C288S                                         | 5' TCAGGAGCTGAGTCAGTC<br>CAGCGGCC 3'                                                                         | 5' ATGAGCTCTTTGTAGC<br>GCTCAAAGGAC 3'                                                            |
| BAC_UL53-<br>C214S                                 | 5' CACATGCACGTCATCTTCGA<br>AAACCCCGACGTGCACATCCC<br>CAGCGACTGCATC<br>TAGGGATAACAGGGTAATCGA<br>TTT 3'         | 5' GTCTTCGCGCGCCGCCG<br>TGAGCATCTGCGTGATGCAG<br>TCGCTGGGGATGTG<br>GCCAGTGTTACAACCAATTA<br>ACC 3' |
| BAC_UL53-<br>S214C                                 | 5' CACATGCACGTCATCTTCGA<br>AAACCCCGACGTGCACATCCC<br>CTGCGACTGCATCTAGGGATA<br>ACAGGGTAATCGATTT 3'             | 5'GTCTTCGCGCGCCGCCGTGAGC<br>ATCTGCGTGATGCAGTCGCAGGG<br>GATGTGGCCAGTGTTACAAC<br>CAATTAACC 3'      |
| GST-Myc-<br>UL53 <sup>50-292</sup>                 | Introducing Myc sequence (in two consecutive parts of five residues each) into GST- UL53 <sup>50-292</sup> : |                                                                                                  |
|                                                    | Part 1:<br>5'GGATCCATGGAGCAGAAGTT<br>GATCCCGTCG CCG3'                                                        | 5' CGGCGACGGGATCAAC<br>TTCTGCTCCATGGATCC 3'                                                      |
|                                                    | Part 2:<br>5'GAAGTTGATCTCGGAGGAGG<br>ACCTGCCGTCGCCG3'                                                        | 5' CGGCGACGGCAGGTCCT<br>CCTCCGAGATCAACTTC 3'                                                     |
| GST-Myc-<br>G/S linker –<br>UL53 <sup>50-292</sup> | Introducing a 13 glycine-serine linker sequence into GST-Myc-UL53 <sup>50-292</sup> in three parts:          |                                                                                                  |

|                                                    |                                                                                           |                                              |
|----------------------------------------------------|-------------------------------------------------------------------------------------------|----------------------------------------------|
|                                                    | Part 1:<br>5'GAGGAGGACCTGGGAGGAG<br>GAGGCCCGTCGCCG3'                                      | 5' CGGCGACGGGCCTCCTCC<br>TCCCAGGTCCTCCTC 3'  |
|                                                    | Part 2:<br>5'GGAGGAGGAGGCTCAGGAG<br>GAGGACCGTCGCCG3'                                      | 5' CGGCGACGGTCCTCCTCC<br>TGAGCCTCCTCCTCC 3'  |
|                                                    | Part 3:<br>5' GGAGGTGGAGGAGGAGGAG<br>GAGGACCGTCGCCG3'                                     | 5' CGGCGACGGTCCTCCTCC<br>TCCTCCTCCACCTCC 3'  |
| His- UL50 <sup>1-169</sup><br>E56A                 | 5' GTCTATTGTGTCGCGTATC<br>TACTCAG 3'                                                      | 5' CTGAGTAGATACGCGACACA<br>ATAGAC 3'         |
| His- M50 <sup>1-168</sup>                          | Primers for transferring the M50 gene from a previous plasmid to the pET15b vector        |                                              |
|                                                    | 5'CAGAATGCTGGTCATATGAT<br>GGAGATC 3'                                                      | 5'CTACGCGTAAGAATTCTCGAC<br>GTC3'             |
| GST-Myc-<br>G/S linker –<br>M53 <sup>103-333</sup> | Generating linearized GST-Myc-G/S linker plasmid for InFusion-based cloning               |                                              |
|                                                    | 5' CCG TCG CCG GCC GAC GCG<br>CGC 3'                                                      | 5' ACC ACC ACC TGA ACC<br>TCC ACC 3'         |
|                                                    | Generating M53 insert for InFusion-based cloning into GST-Myc-G/S linker plasmid          |                                              |
|                                                    | 5' GGT TCA GGT GGT GGT ATG<br>GCT CCG GAA AG 3'                                           | 5' GTC GGC CGG CGA CGG TTA<br>TTA CAG G 3'   |
| GST-Myc-<br>G/S linker –<br>UL30 peptide           | Generating UL30 peptide insert for InFusion-based cloning into GST-Myc-G/S linker plasmid |                                              |
|                                                    | 5' GGT TCA GGT GGT GGT ATG<br>GAG GAC GTG 3'                                              | 5' GTC GGC CGG CGA CGG TTA<br>TTA TGC TAG 3' |
