# Supplementary material for: A small molecule exerts selective antiviral activity by targeting the human cytomegalovirus nuclear egress complex
Source: PubMed Central journal article supplement (PMC10691697; doi:10.1371/journal.ppat.1011781), 2023-11-17
Supplement: ppat.1011781.s018.pdf [file ppat.1011781.s018.pdf]

## S1 Appendix List of libraries screened

| <b><u>Library Name</u></b> |
|----------------------------|
| ActiMolTimTec1             |
| Asinex1                    |
| Biomol4                    |
| BiomolICCBL-2012           |
| Bionet2                    |
| BU-CMD 2017                |
| Cayman Biolipid 1          |
| CB GPCR                    |
| CB IONCore                 |
| CB KINACore                |
| CB NHRBCore                |
| ChemBridge3                |
| ChemDiv1                   |
| ChemDiv2                   |
| ChemDiv3                   |
| ChemDiv4                   |
| ChemDiv5                   |
| ChemDiv6                   |
| ChemDiv7                   |
| EMD1                       |

|                 |
|-----------------|
| eMolecules 2014 |
| Enamine1        |
| Enamine2        |
| Gray1           |
| HME1            |
| IFLab1          |
| IFLab2          |
| LifeChemicals1  |
| LINCS1          |
| LINCS2          |
| LINCS3          |
| LINCS4          |
| LOPAC1          |
| Maybridge3      |
| Maybridge4      |
| Maybridge5      |
| Microsource1    |
| MixCom5         |
| MSDiscovery1    |
| NCC1-2013       |
| NCC2-2013       |
| Prestwick2      |
| Selleck-10mM    |

|            |
|------------|
| SYNthesis2 |
| Tocris2    |
