# Supplementary material for: A small molecule exerts selective antiviral activity by targeting the human cytomegalovirus nuclear egress complex
Source: PubMed Central journal article supplement (PMC10691697; doi:10.1371/journal.ppat.1011781), 2023-11-17
Supplement: ppat.1011781.s019.pdf [file ppat.1011781.s019.pdf]

## **S2 Appendix Compound characterization data**

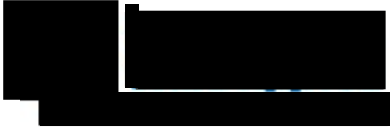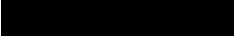

EW17394-9-P1D DMSO Bruker\_A\_400MHz

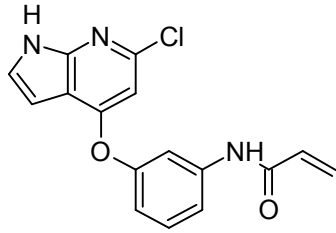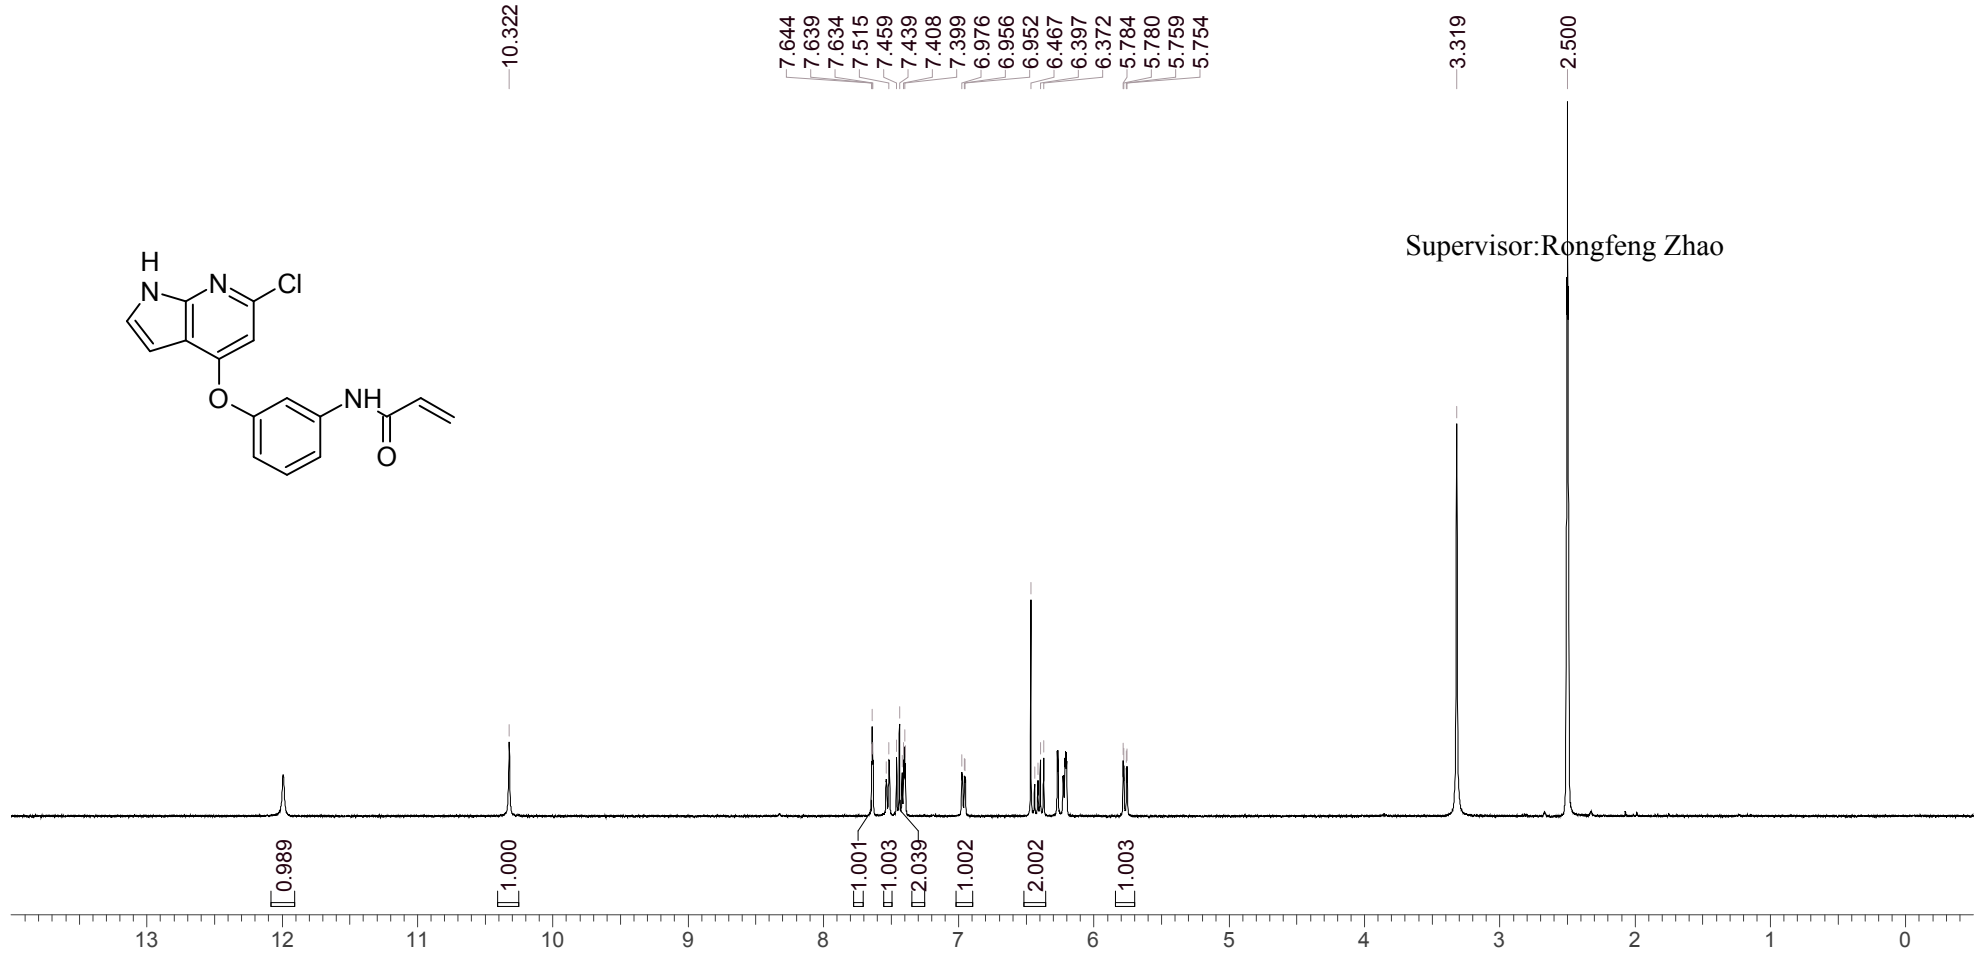

Supervisor: Rongfeng Zhao

Operator:

Date:

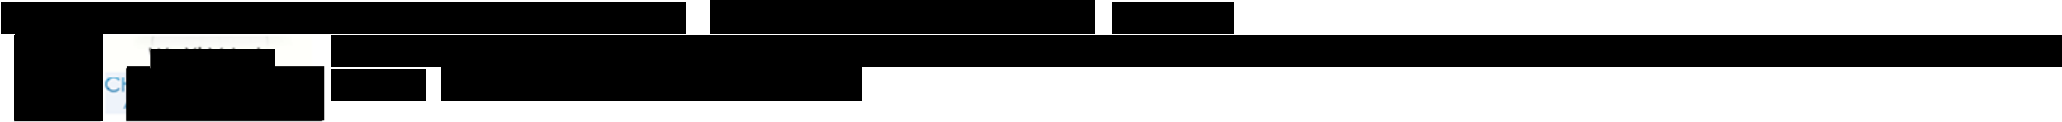

# LCMS REPORT

---

Compound ID : GK1  
 Sample ID : EW17394-9-P1D1  
 Injection Vol : 0.5ul  
 Location : vial55  
 Acq Method : d:\method\5-95AB\_R\_220&254.lcm  
 Org DataFile : D:\DATA\1903\190327\EW17394-9-P1D1.lcd  
 Injection Date : 3/27/2019 1:59:53 PM  
 Instrument : LCMS-I

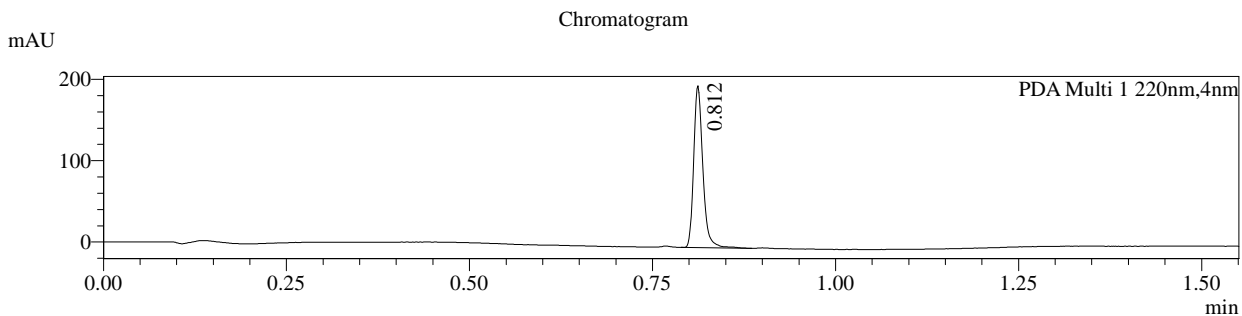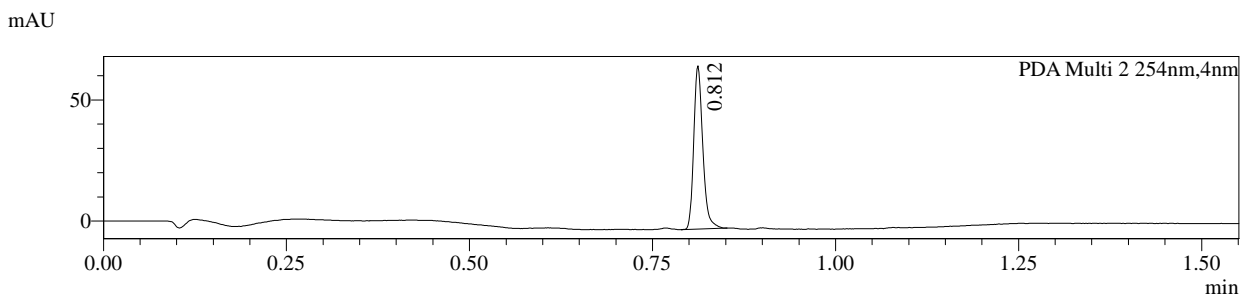

- 1 PDA Multi 1 / 220nm,4nm
- 2 PDA Multi 2 / 254nm,4nm

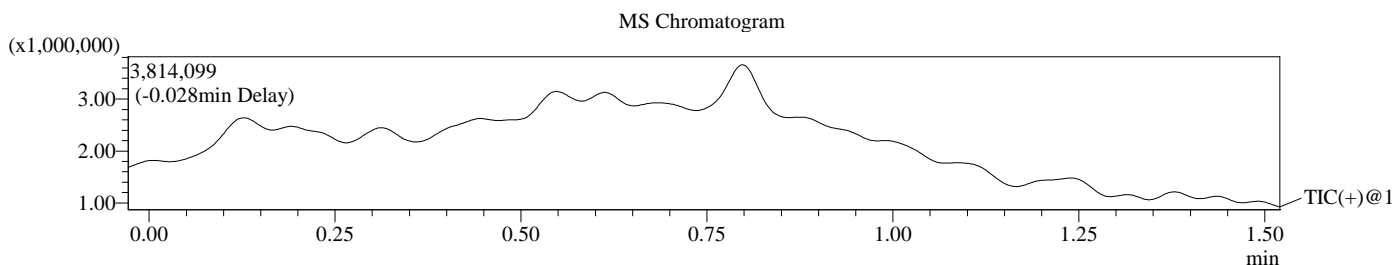


---

Integration Result

---

Peak Table

| PDA Ch1 220nm |           |        |         |           |        |         |
|---------------|-----------|--------|---------|-----------|--------|---------|
| Peak#         | Ret. Time | Height | Height% | USP Width | Area   | Area%   |
| 1             | 0.812     | 199017 | 100.000 | 0.025     | 174854 | 100.000 |

Peak Table

| PDA Ch2 254nm |           |        |         |           |       |         |
|---------------|-----------|--------|---------|-----------|-------|---------|
| Peak#         | Ret. Time | Height | Height% | USP Width | Area  | Area%   |
| 1             | 0.812     | 67326  | 100.000 | 0.025     | 58278 | 100.000 |

Operator: \_\_\_\_\_

Date: \_\_\_\_\_



Mass Spectrum

RefTime: 0.812 DateFile: D:\DATA\1903\190327\EW17394-9-PID1.lcd

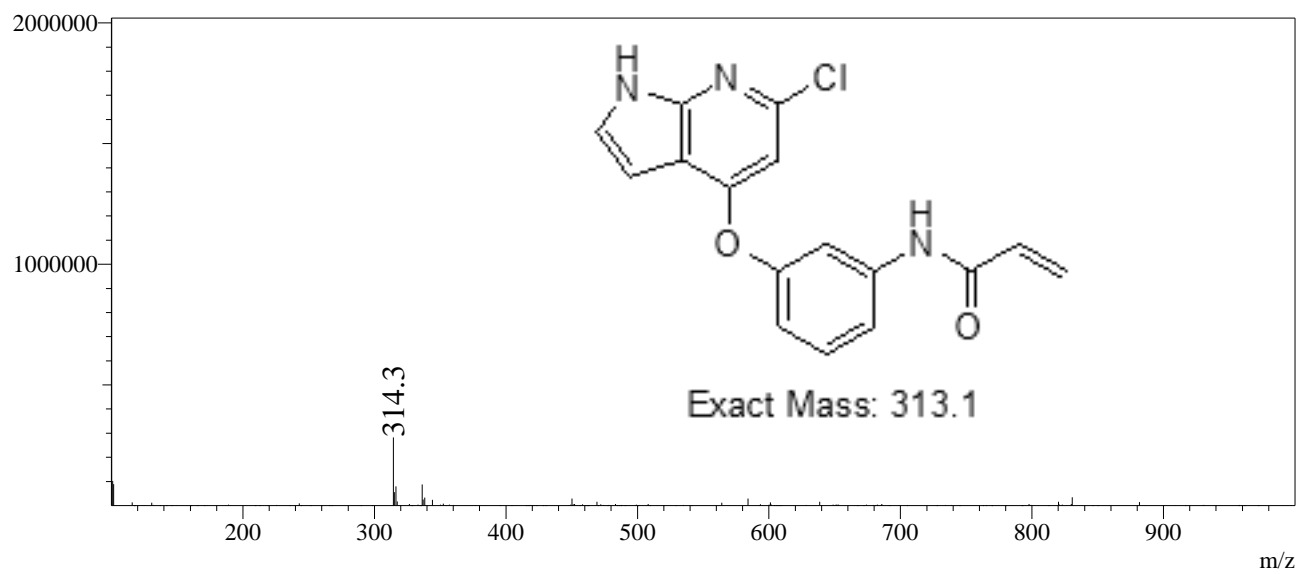

# HPLC REPORT

Compound ID : GK1  
 Sample ID : EW17394-9-P1D  
 Vial# : 23  
 Injection Volumn : 1  
 Filename : D:\DATA\2019\1903\190327\EW17394-9-P1D.lcd  
 Method Name : D:\Method\10-80AB\_4min.lcm  
 Instrument : HPLC-P  
 Run time : 3/27/2019 1:53:15 PM

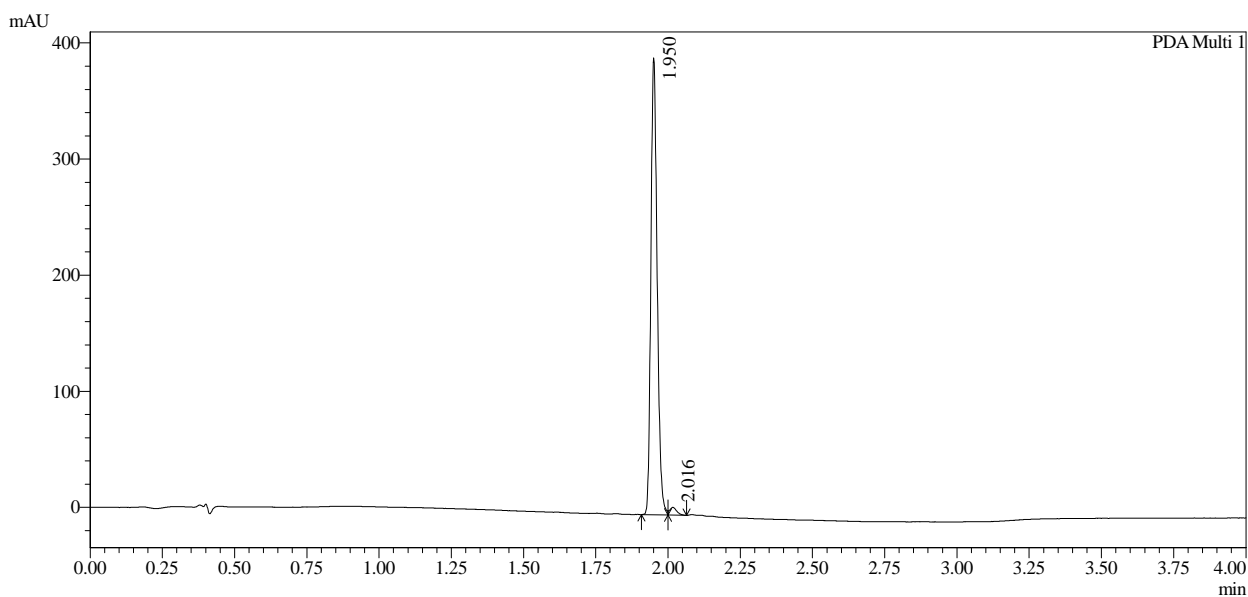

1 PDA Multi 1 / 220nm,4nm

### Integration result

#### PeakTable

| Peak# | Ret. Time | USP Width | Resolution | Height | Area   | Area %  |
|-------|-----------|-----------|------------|--------|--------|---------|
| 1     | 1.950     | 0.041     | 0.000      | 393492 | 594166 | 98.161  |
| 2     | 2.016     | 0.052     | 1.415      | 6597   | 11130  | 1.839   |
| Total |           |           |            | 400090 | 605296 | 100.000 |

Operator : \_\_\_\_\_

Date : \_\_\_\_\_

# HPLC REPORT

Compound ID : GK1  
Sample ID : EW17394-9-P1D  
Filename : D:\DATA\2019\1903\190327\EW17394-9-P1D.lcd  
Method Name : D:\Method\10-80AB\_4min.lcm  
Instrument : HPLC-P  
Run time : 3/27/2019 1:53:15 PM

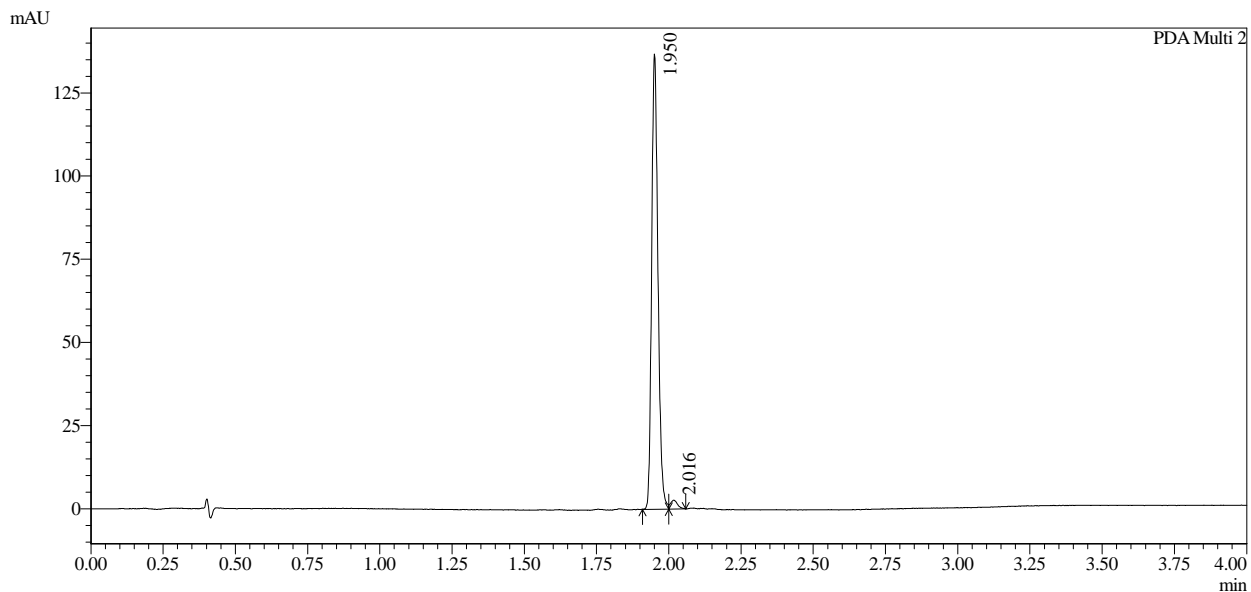

## Integration result

### PeakTable

PDA Ch2 254nm

| Peak# | Ret. Time | USP Width | Resolution | Height | Area   | Area %  |
|-------|-----------|-----------|------------|--------|--------|---------|
| 1     | 1.950     | 0.041     | 0.000      | 136824 | 206893 | 97.880  |
| 2     | 2.016     | 0.052     | 1.431      | 2683   | 4482   | 2.120   |
| Total |           |           |            | 139507 | 211374 | 100.000 |

Operator : \_\_\_\_\_

Date : \_\_\_\_\_

# HPLC REPORT

Compound ID : GK1  
 Sample ID : EW17394-9-P1D  
 Filename : D:\DATA\2019\1903\190327\EW17394-9-P1D.lcd  
 Method Name : D:\Method\10-80AB\_4min.lcm  
 Instrument & Column : HPLC-P  
 Run time : 3/27/2019 1:53:15 PM

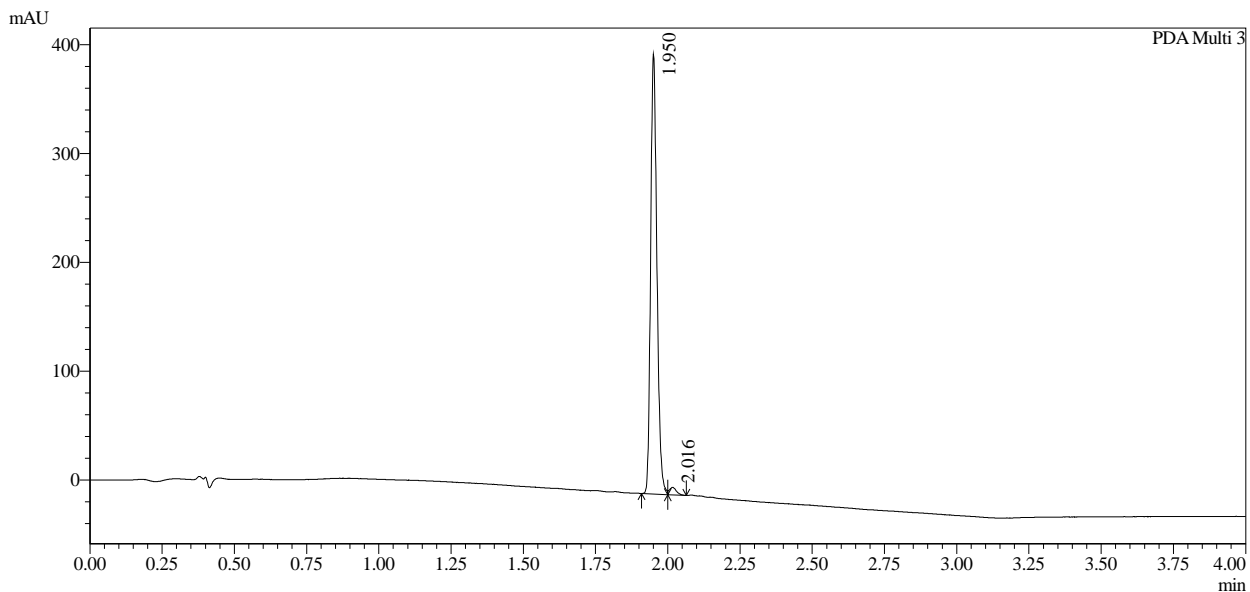

1 PDA Multi 3 / 215nm,4nm

### Integration result

#### PeakTable

PDA Ch3 215nm

| Peak# | Ret. Time | USP Width | Resolution | Height | Area   | Area %  |
|-------|-----------|-----------|------------|--------|--------|---------|
| 1     | 1.950     | 0.041     | 0.000      | 404407 | 610289 | 98.139  |
| 2     | 2.016     | 0.053     | 1.410      | 6954   | 11572  | 1.861   |
| Total |           |           |            | 411362 | 621862 | 100.000 |

Operator : \_\_\_\_\_

Date : \_\_\_\_\_

## Certificate of Analysis

Product Name: 2-Propenamide, N-[3-(1H-pyrrolo[2,3-b]pyridin-4-yloxy)phenyl]-

Chemical Name: 2-Propenamide, N-[3-(1H-pyrrolo[2,3-b]pyridin-4-yloxy)phenyl]-

Cat. No.: HY-103015

CAS No.: 1222776-76-2

Batch No.: 25811

Formula:  $C_{14}H_{13}N_3O_2$

M.Wt: 279.29

Appearance: White to off-white (Solid)

Chemical Structure:

Storage: Storage temp. 2-8°C

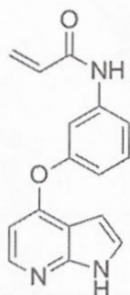

### ANALYTICAL DATA

$^1\text{H}$  NMR Spectrum:

Consistent with structure

LCMS:

Consistent with structure

Purity (LCMS):

98.17%

Conclusion:

The product has been tested and complies with the given specifications.

Caution: Product has not been fully validated for medical applications. For research use only.

Sample ID: CZ4538-015-1, Catalog No: HY-103015 Batch#25811, DMSO-d6

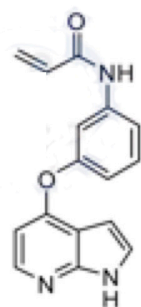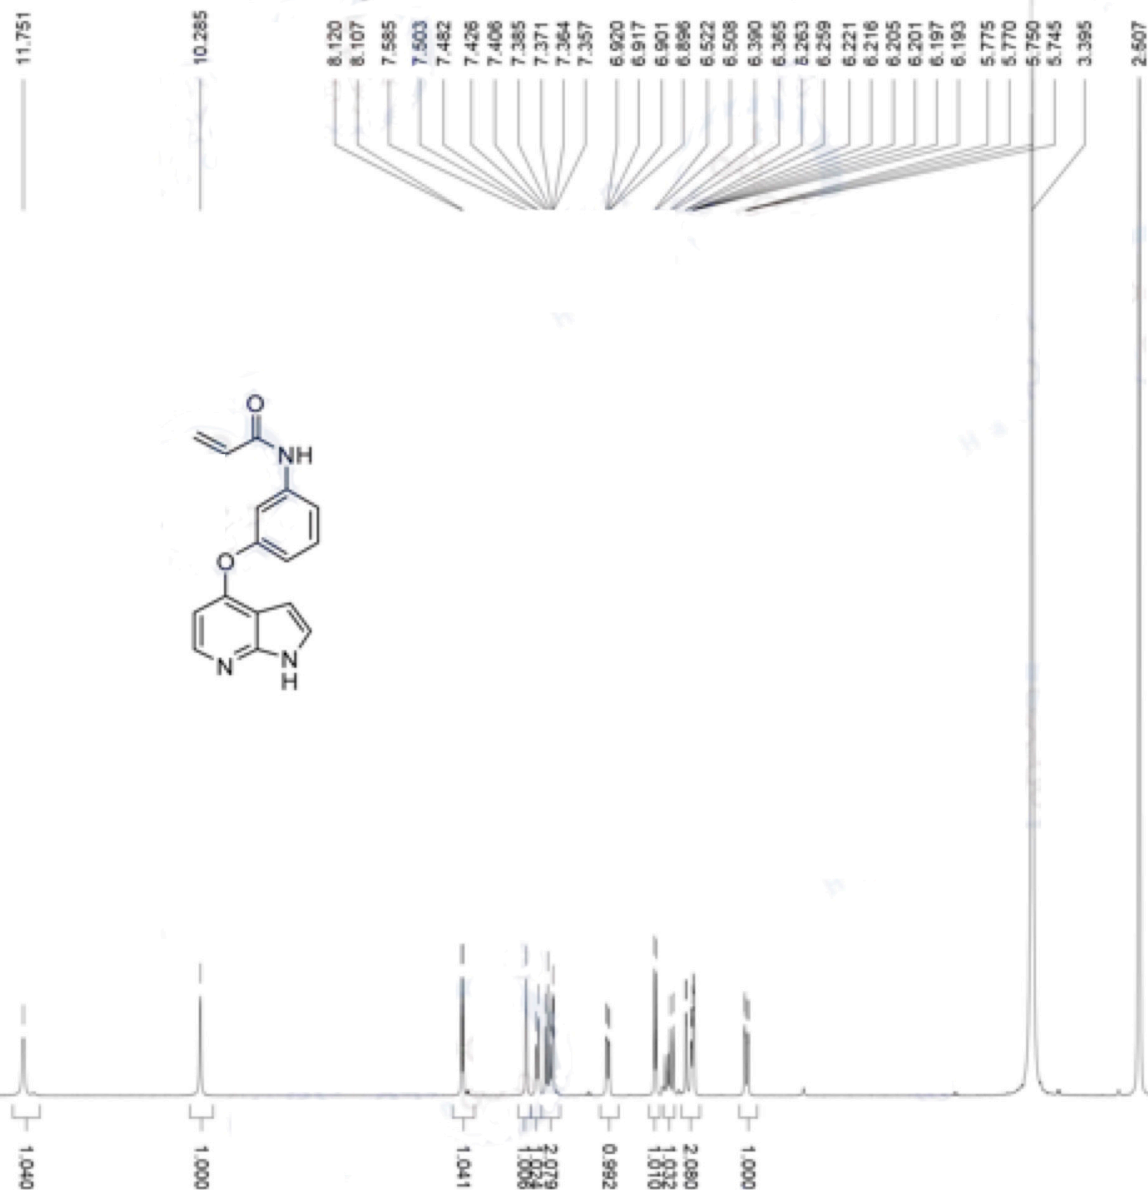

Date:

11 Aug 2017

Document's Title:

Catalog No: HY-103015 Batch#25811

Spectrum Title:

cz4538-015-1-dms0-170811

Frequency (MHz):

(f1) 400.130

Original Points Count:

(f1) 32768

Actual Points Count:

(f1) 32768

Acquisition Time (sec):

(f1) 3.2768

Spectral Width (ppm):

(f1) 24.992

Pulse Program:

Unknown

File ..0809-1 2017-08-09 12-48-50\CZ4538-015-1-1.D Tgt Mass (CHM):  
 Injection Date : 8 Aug 17 7:03 pm +0800 Seq. Line : 70  
 Sample Name : CZ4538-015-1\_1 Location : P2-C-04  
 Acq. Operator : GHS\_886 Inj : 1  
 Spec. Reported : MS Integration Inj Volume : 1 ul  
 Acq. Method : D:\chem32\1\DATA\20170809\20170809-1 2017-08-09 12-48-50\1-POS-3MIN.M  
 Analysis Method : D:\chem32\1\DATA\20170809\20170809-1 2017-08-09 12-48-50\1-POS-3MIN.M  
 Catalog No : HY-103015 Batch#25811 ARP-186  
 Method Info : Mobile Phase: A: water(0.01%TFA) B:ACN(0.01%TFA)  
 Gradient: 5% to 95%B within 1.3 min  
 Flow Rate :1.8ml/min  
 Column :SunFire C18, 4.6\*50mm,3.5um A-RP-186  
 Oven Temperature : 45C

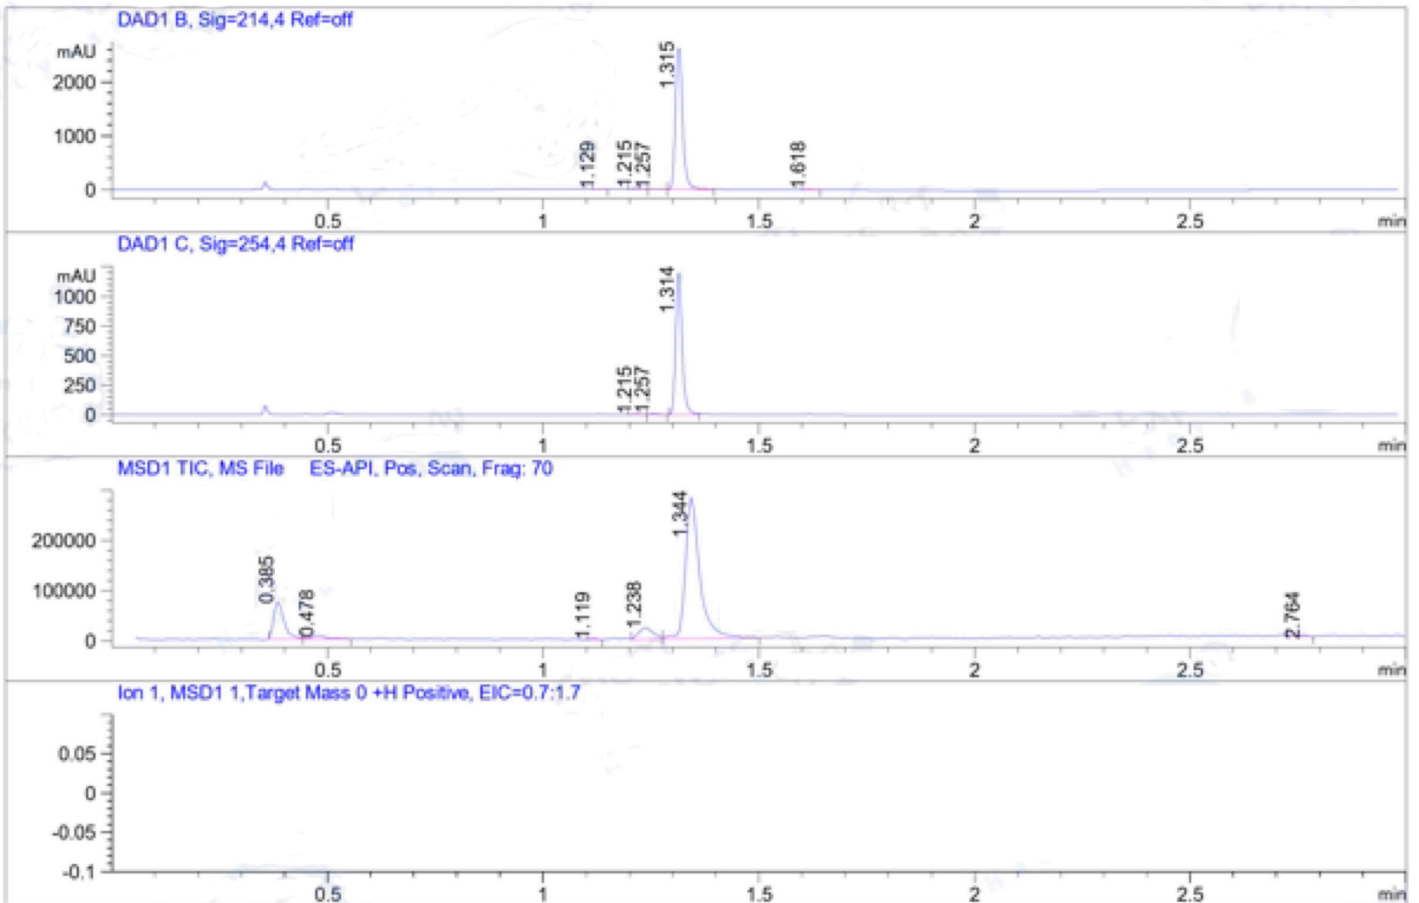

Integration Results for DAD1 B, Sig=214.4 Ref=off

| RetTim | Width | Area    | Height  | Area% | MS (+) |
|--------|-------|---------|---------|-------|--------|
| 1.13   | 0.01  | 5.42    | 5.91    | 0.18  | ND     |
| 1.21   | 0.01  | 29.20   | 29.80   | 0.95  | 308    |
| 1.26   | 0.02  | 12.06   | 9.90    | 0.39  | 226    |
| 1.31   | 0.02  | 3024.11 | 2624.48 | 98.17 | 280    |
| 1.62   | 0.02  | 9.74    | 7.57    | 0.32  | 280    |

Integration Results for DAD1 C, Sig=254.4 Ref=off

| RetTim | Width | Area    | Height  | Area% | MS (+) |
|--------|-------|---------|---------|-------|--------|
| 1.21   | 0.02  | 6.42    | 6.24    | 0.52  | 308    |
| 1.26   | 0.02  | 11.27   | 10.26   | 0.91  | 226    |
| 1.31   | 0.02  | 1225.93 | 1197.16 | 98.58 | 280    |

Integration Results for MSD1 TIC, MS File

| RetTim | Width | Area      | Height   | Area% | MS (+) |
|--------|-------|-----------|----------|-------|--------|
| 0.39   | 0.03  | 122125.49 | 74125.60 | 14.13 | 123    |

Ret. Time: 0.39 <<<< POSITIVE SPECTRA >>>>

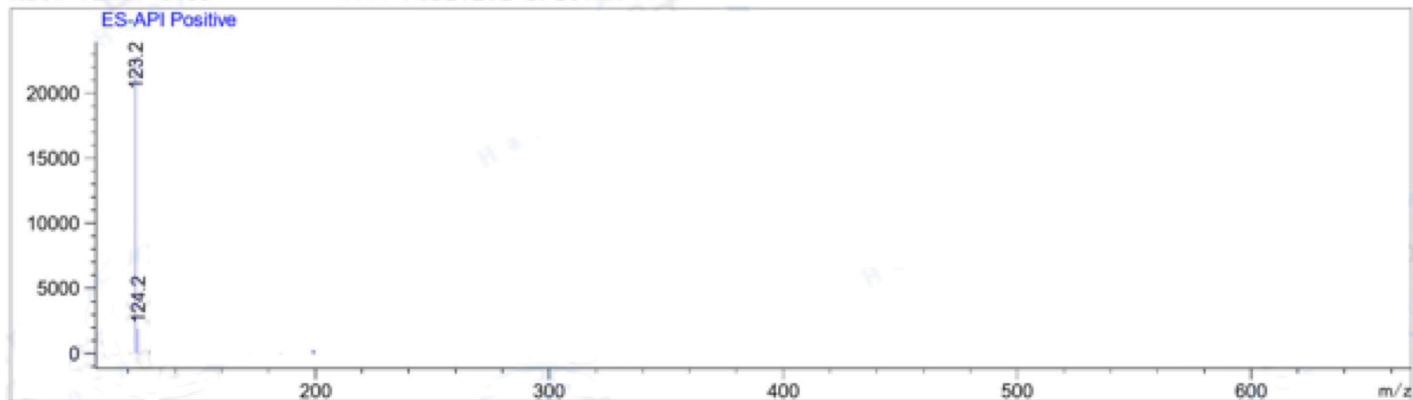

Ret. Time: 0.48

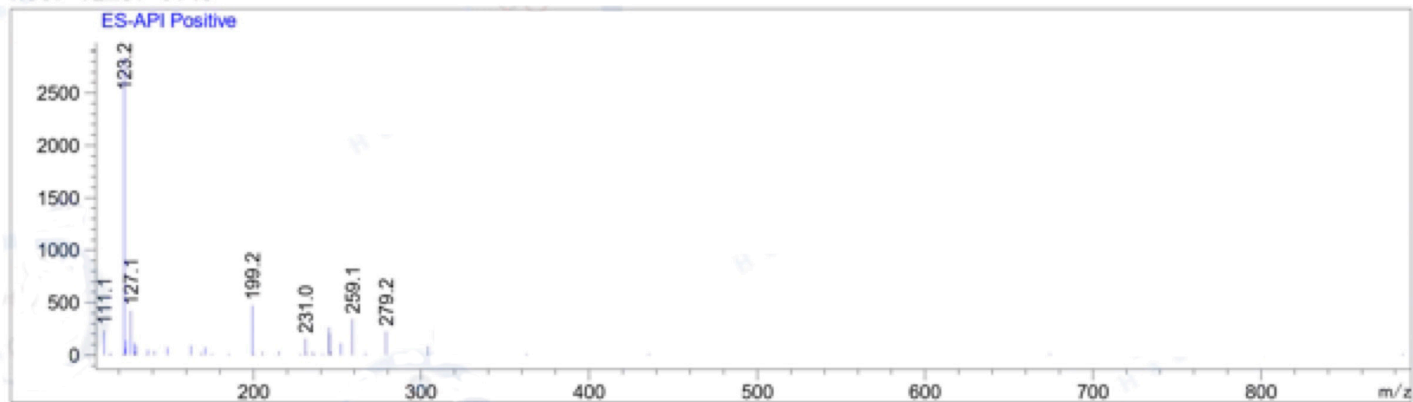

Ret. Time: 1.24

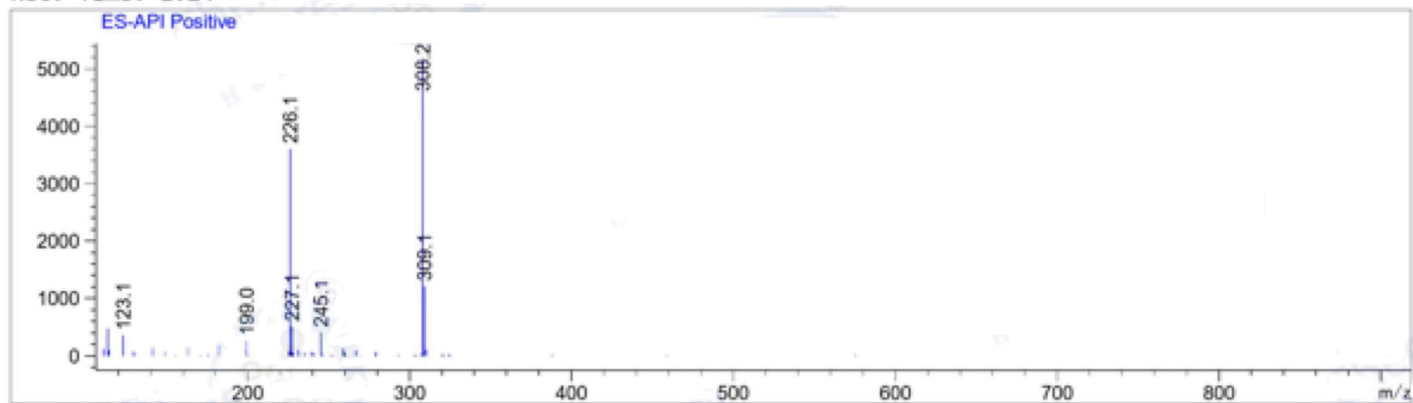

Ret. Time: 1.34

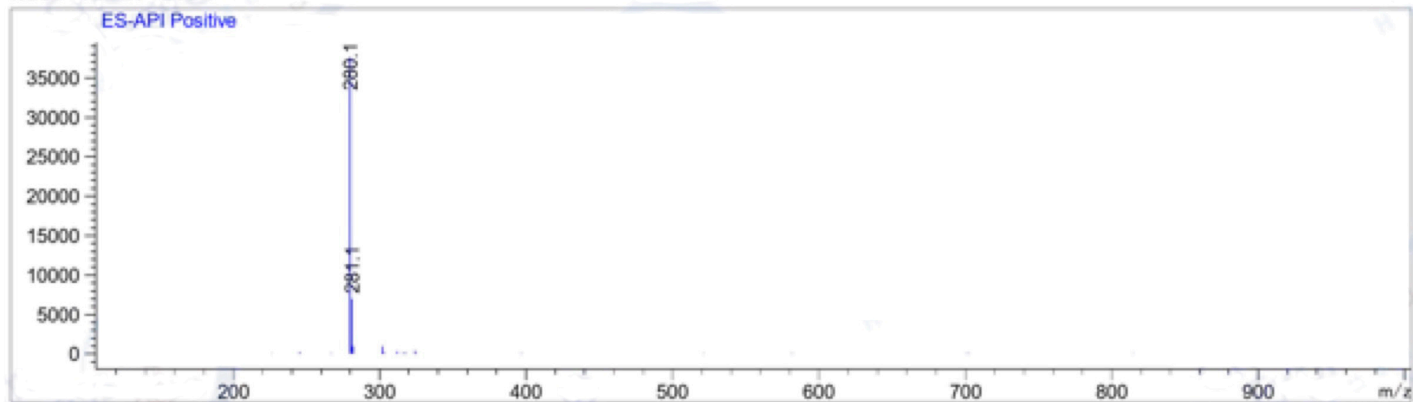



## Certificate of Analysis

Product Name: N-(3-((1H-pyrrolo[2,3-b]pyridin-4-yl)oxy)phenyl)propionamide

Chemical Name: N-(3-((1H-pyrrolo[2,3-b]pyridin-4-yl)oxy)phenyl)propionamide

Cat. No.: HY-103016

Batch No.: 25812

M.Wt: 281.31

Chemical Structure:

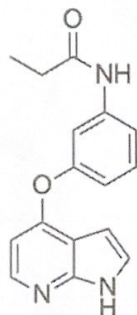

Formula: C<sub>16</sub>H<sub>15</sub>N<sub>3</sub>O<sub>2</sub>

Appearance: White to off-white (Solid)

Storage: Storage temp. 2-8°C

### ANALYTICAL DATA

<sup>1</sup>H NMR Spectrum: Consistent with structure

LCMS: Consistent with structure

Purity (LCMS): 98.01%

Conclusion: The product has been tested and complies with the given specifications.

Caution: Product has not been fully validated for medical applications. For research use only.

Sample ID: CZ4538-011-1, Catalog No: HY-103016 Batch#25812, DMSO-d6

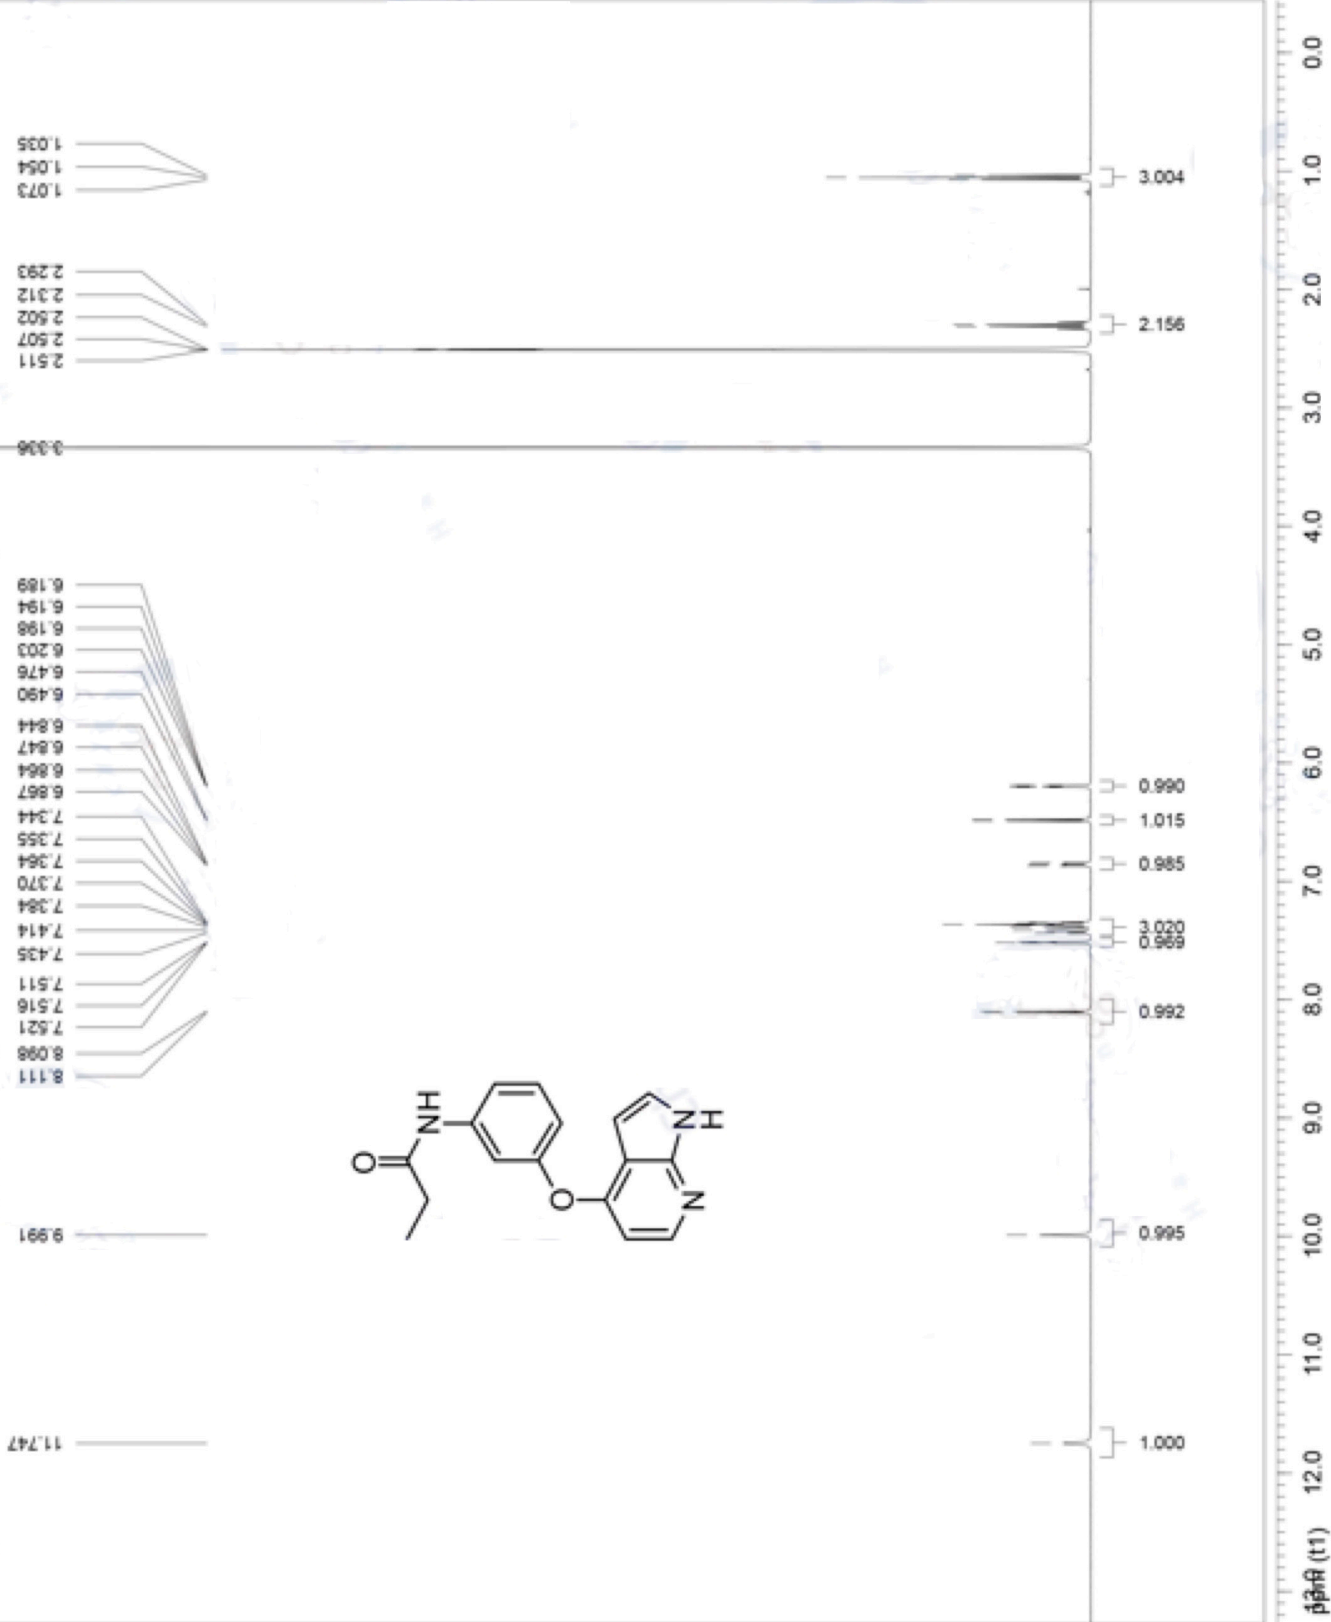

Date:

10 Aug 2017

Document's Title:

Catalog No: HY-103016 Batch#25812

Spectrum Title:

CZ4538-011-1-dmso-170809

Frequency (MHz):

(f1) 400.130

Original Points Count:

(f1) 32768

Actual Points Count:

(f1) 32768

Acquisition Time (sec):

(f1) 3.2768

Spectral Width (ppm):

(f1) 24.992

Pulse Program:

Unknown

File ..0809-1 2017-08-09 14-16-54\CZ4538-011-1-4.D Tgt Mass (CHM):  
 Injection Date : 9 Aug 17 5:58 pm +0800 Seq. Line : 41  
 Sample Name : CZ4538-011-1-4 Location : P2-B-08  
 Acq. Operator : GHS 886 Inj : 1  
 Spec. Reported : MS Integration Inj Volume : 1 ul  
 Acq. Method : D:\chem32\1\DATA\20170809\20170809-1 2017-08-09 14-16-54\1-POS-3MIN.M  
 Analysis Method : D:\CHEM32\1\DATA\20170809\20170809-1 2017-08-09 14-16-54\1-POS-3MIN.M  
 Catalog No : HY-103016 Batch#25812 ARP-186  
 Method Info : Mobile Phase: A: water(0.01%TFA) B:ACN(0.01%TFA)  
 Gradient: 5% to 95%B within 1.3 min  
 Flow Rate :1.8ml/min  
 Column :SunFire C18, 4.6\*50mm,3.5um A-RP-186  
 Oven Temperature : 45C

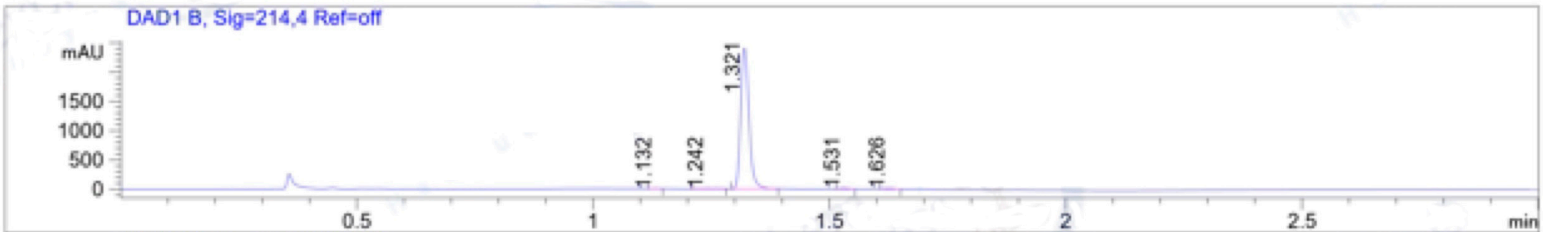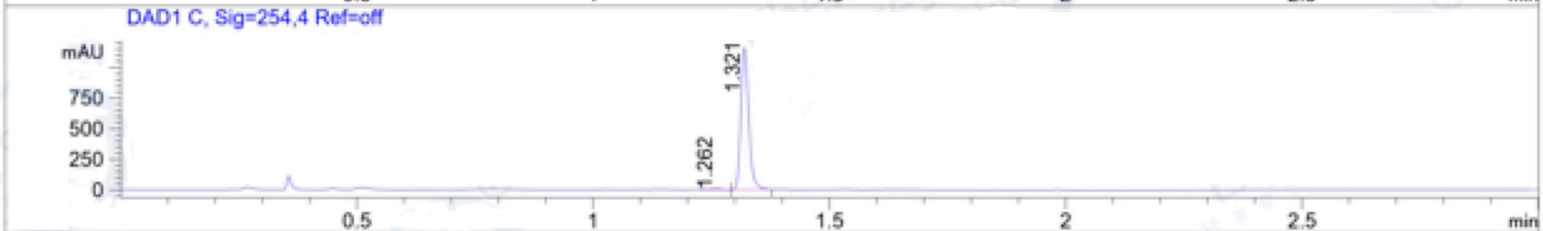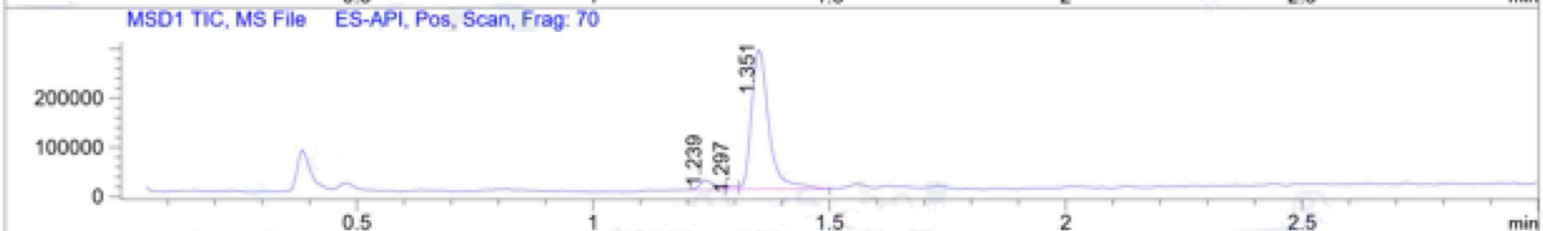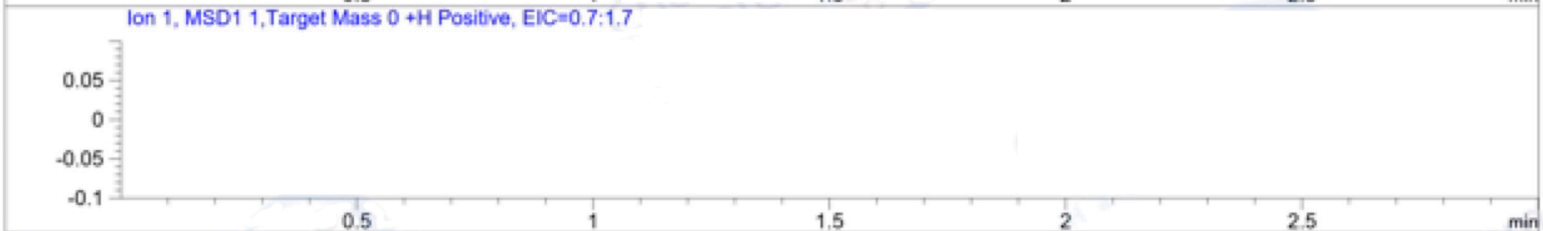

Integration Results for DAD1 B, Sig=214,4 Ref=off

| RetTim | Width | Area    | Height  | Area% | MS (+) |
|--------|-------|---------|---------|-------|--------|
| 1.13   | 0.01  | 4.61    | 5.36    | 0.15  | 149    |
| 1.24   | 0.04  | 23.58   | 9.25    | 0.79  | 308    |
| 1.32   | 0.02  | 2930.63 | 2405.42 | 98.01 | 282    |
| 1.53   | 0.02  | 17.03   | 14.14   | 0.57  | 149    |
| 1.63   | 0.02  | 14.36   | 10.60   | 0.48  | 149    |

Integration Results for DAD1 C, Sig=254,4 Ref=off

| RetTim | Width | Area    | Height  | Area% | MS (+) |
|--------|-------|---------|---------|-------|--------|
| 1.26   | 0.02  | 16.04   | 9.86    | 1.18  | 308    |
| 1.32   | 0.02  | 1343.84 | 1158.02 | 98.82 | 282    |

Integration Results for MSD1 TIC, MS File

| RetTim | Width | Area     | Height   | Area% | MS (+) |
|--------|-------|----------|----------|-------|--------|
| 1.24   | 0.03  | 41821.64 | 19873.00 | 5.43  | 308    |
| 1.30   | 0.02  | 9901.61  | 7198.52  | 1.29  | 149    |

Ret. Time: 1.24 <<<< POSITIVE SPECTRA >>>>

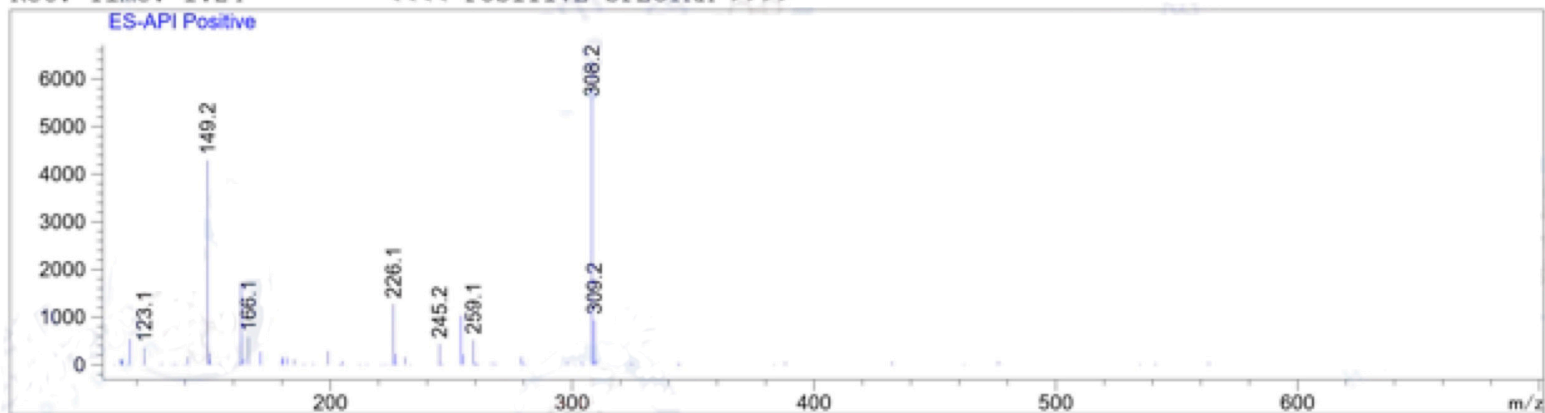

Ret. Time: 1.30

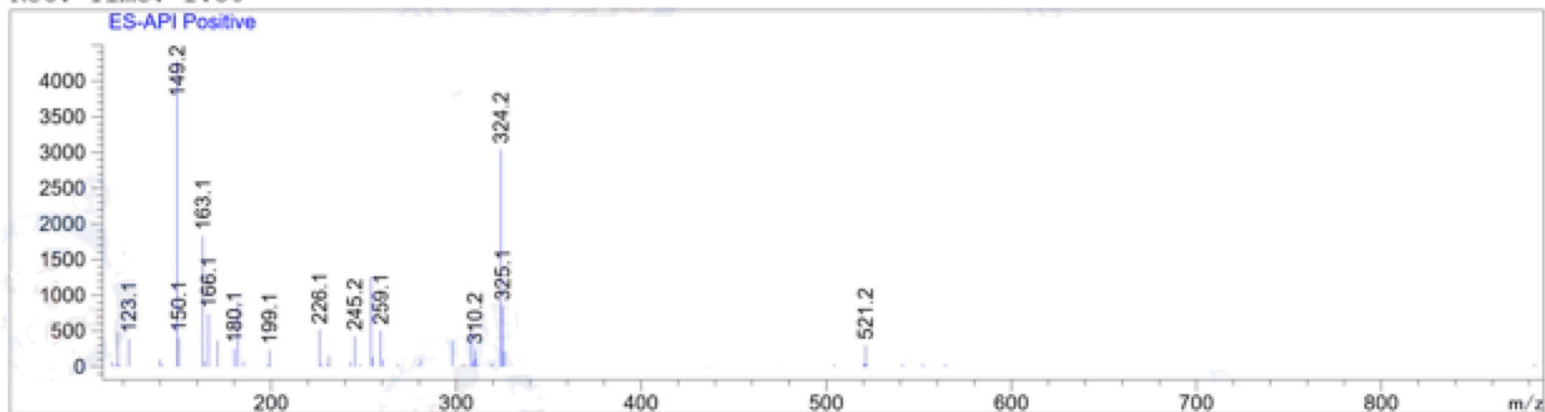

Ret. Time: 1.35

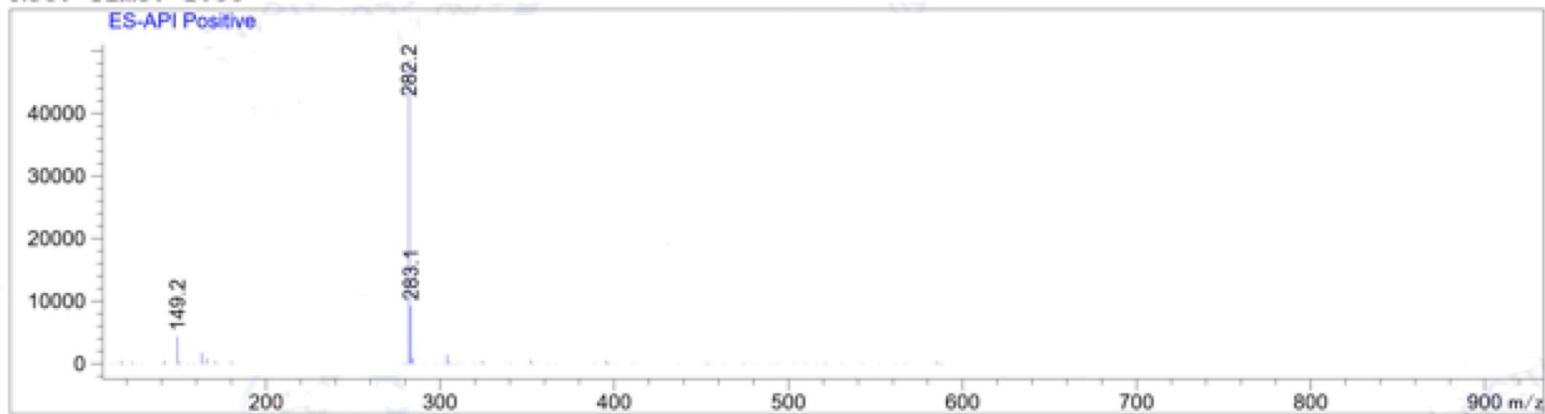

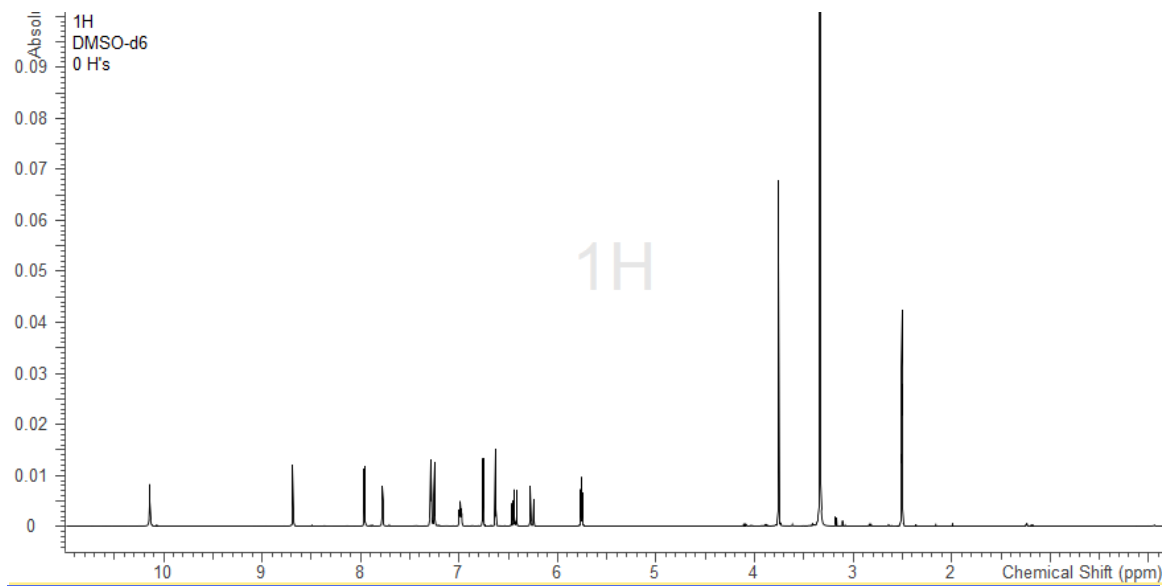

**a2GK2 NMR data**

Compound ID: GK-D1

EW14183-3-P1B CDCl3 Bruker\_E\_400MHz

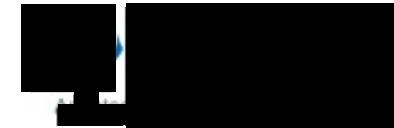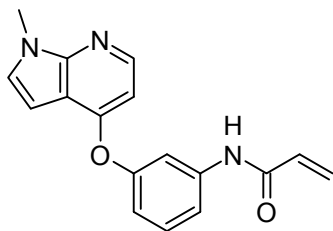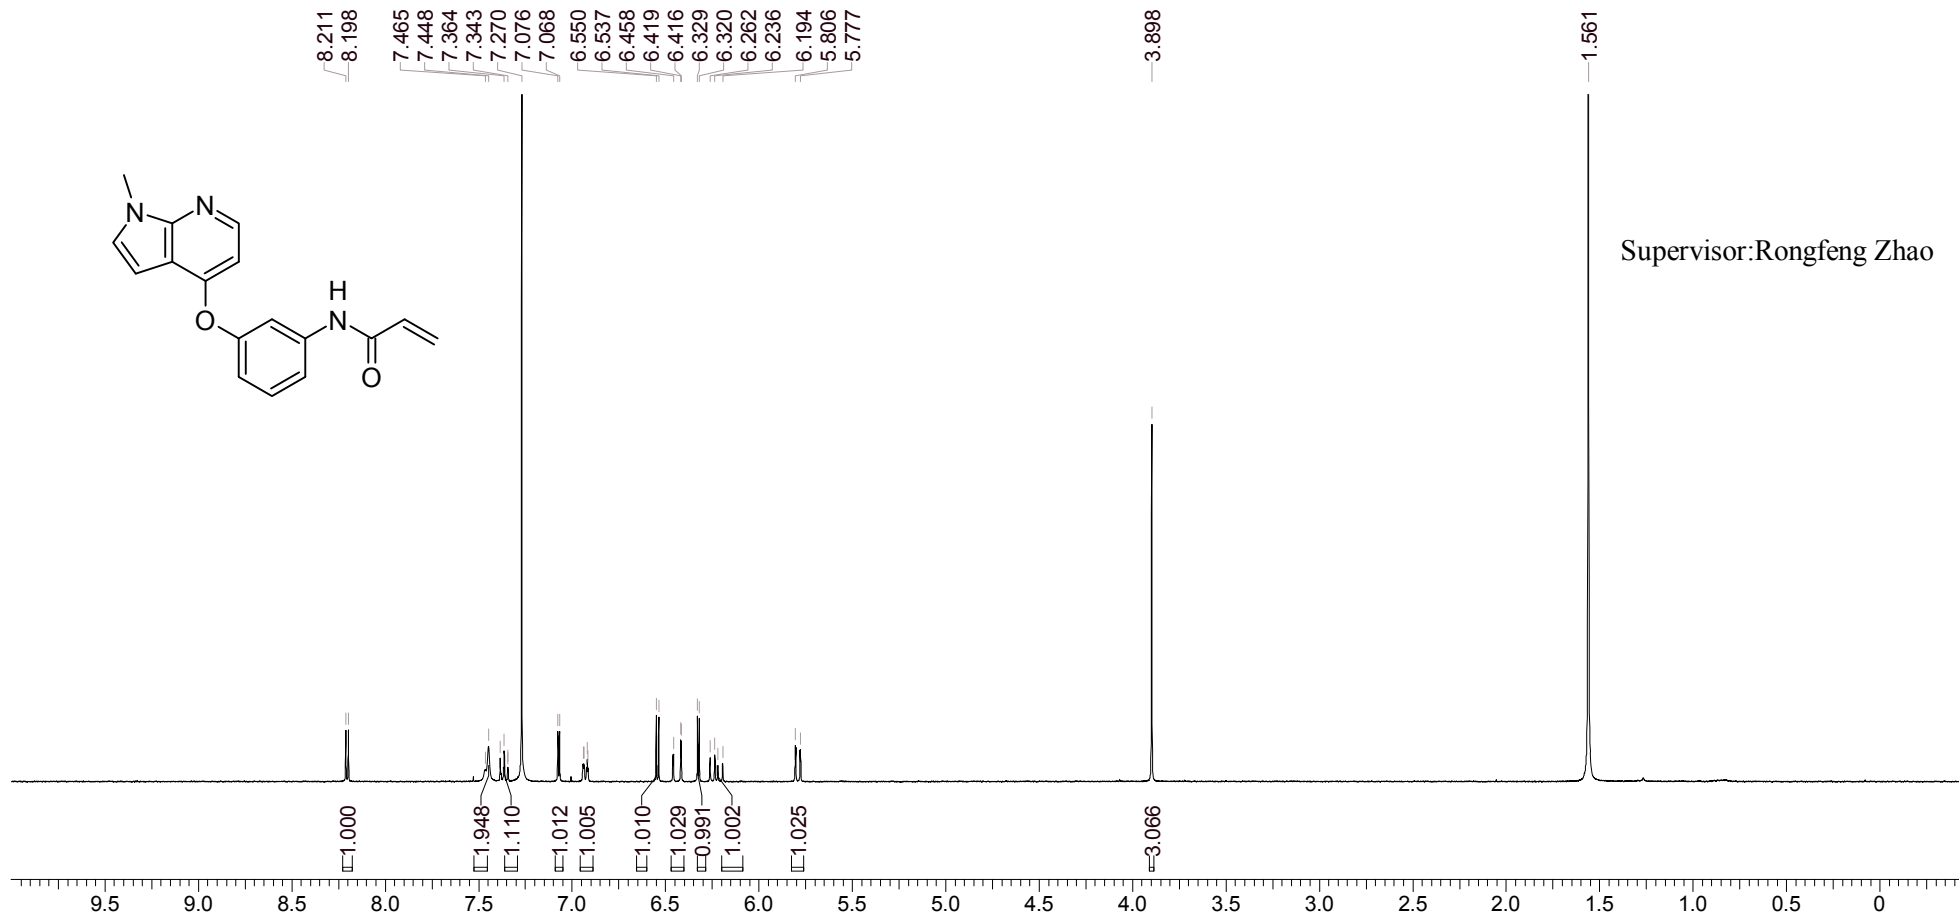

Supervisor: Rongfeng Zhao

Operator:

Date:

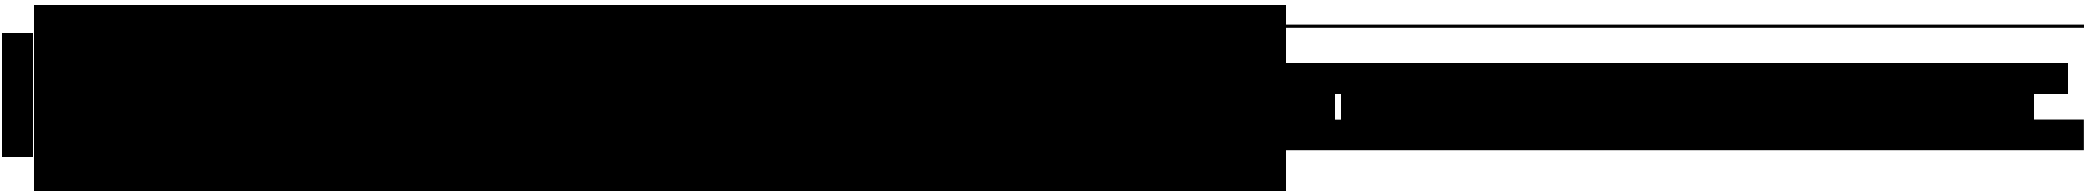

# LCMS REPORT

Compound ID : GK-D1  
 Sample ID : EW14183-3-P1E  
 Injection Vol : 5ul  
 Location : vial24  
 Acq Method : d:\method\5-95AB\_R\_220&254.lcm  
 Org DataFile : D:\DATA\1809\180905\EW14183-3-P1E.lcd  
 Injection Date : 2018-09-05 12:54:03  
 Instrument : LCMS-N 17-102

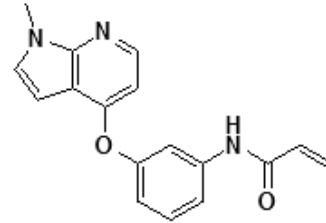

Exact Mass: 293.12

mAU

Chromatogram

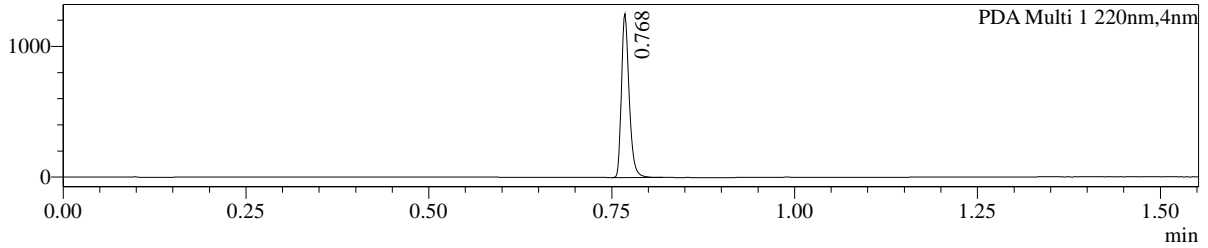

mAU

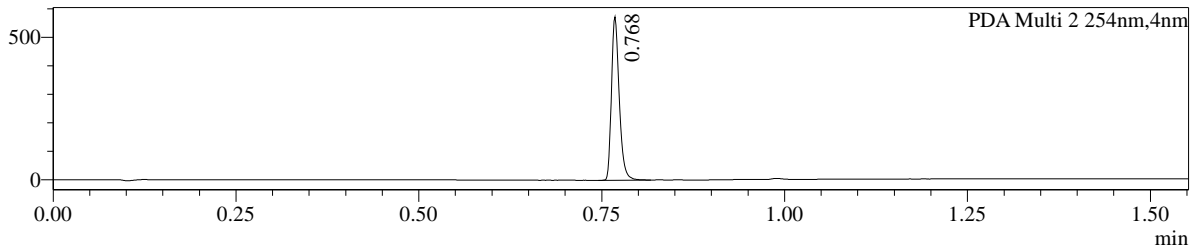

- 1 PDA Multi 1 / 220nm,4nm
- 2 PDA Multi 2 / 254nm,4nm

MS Chromatogram

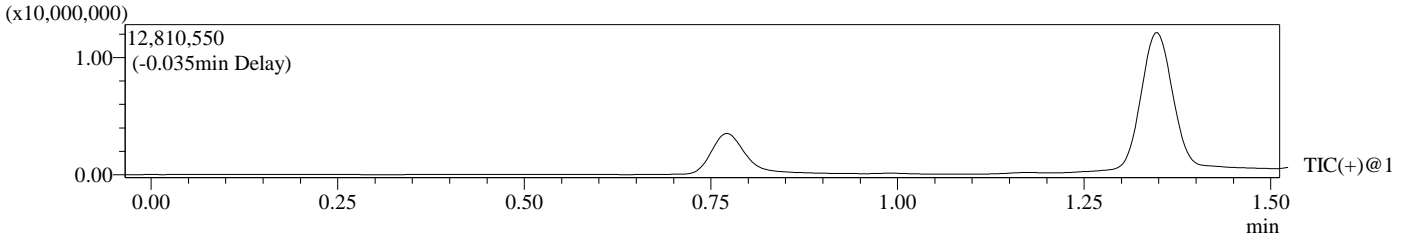

## Integration Result

Peak Table

| Peak# | Ret. Time | Height  | Height% | USP Width | Area   | Area%   |
|-------|-----------|---------|---------|-----------|--------|---------|
| 1     | 0.768     | 1253708 | 100.000 | 0.022     | 920673 | 100.000 |

Peak Table

| Peak# | Ret. Time | Height | Height% | USP Width | Area   | Area%   |
|-------|-----------|--------|---------|-----------|--------|---------|
| 1     | 0.768     | 573711 | 100.000 | 0.022     | 424724 | 100.000 |

Confidential, for research only not for regulatory filing

Operator: \_\_\_\_\_

Date: \_\_\_\_\_



Mass Spectrum

RefTime: 0.768 Datafile: D:\DATA\1809\180905\EW14183-3-PIE.lcd

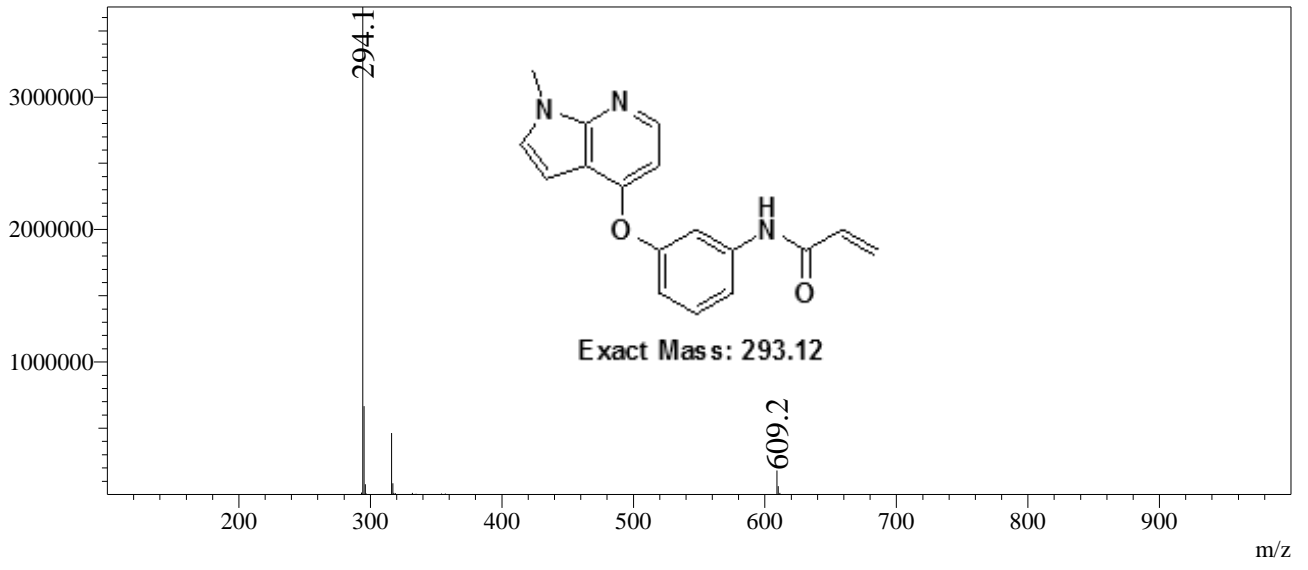

# HPLC REPORT

Compound ID : GK-D1  
 Sample ID : EW14183-3-P1B  
 Vial# : 41  
 Injection Volumn : 5  
 Filename : D:\DATA\2018\1809\180905\EW14183-3-P1B.lcd  
 Method Name : D:\Method\10-80AB\_6min.lcm  
 Instrument : HPLC-N  
 Run time : 2018-09-05 13:53:48

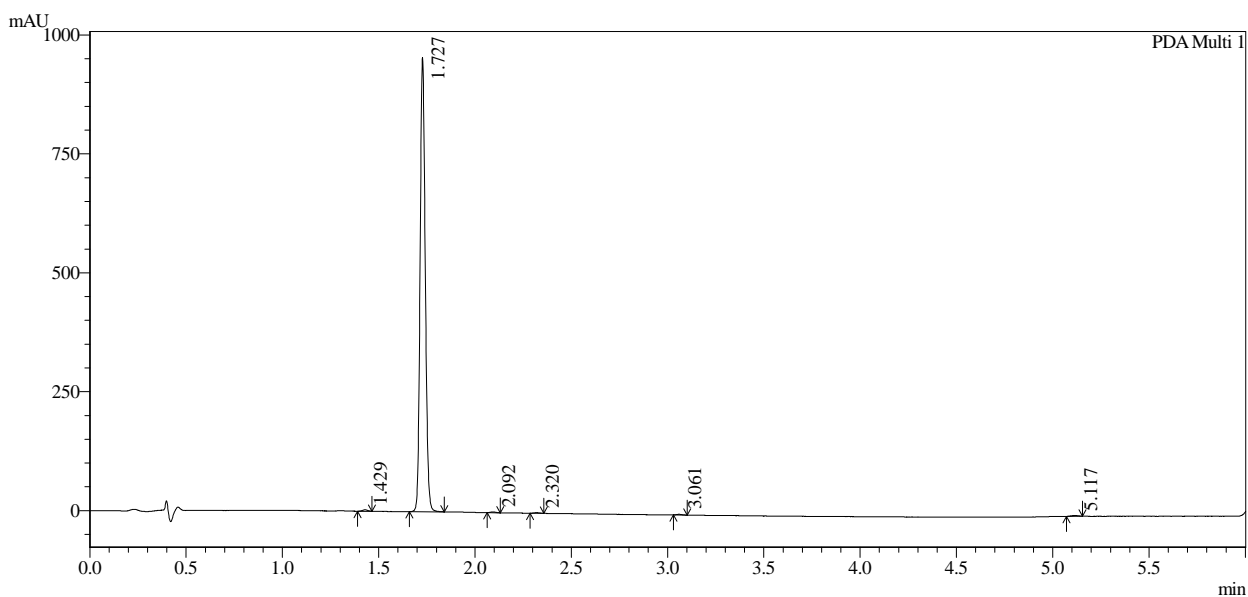

1 PDA Multi 1 / 220nm,4nm

-----  
 Integration result  
 -----

PeakTable

| Peak# | Ret. Time | USP Width | Resolution | Height | Area    | Area %  |
|-------|-----------|-----------|------------|--------|---------|---------|
| 1     | 1.429     | 0.051     | 0.000      | 3055   | 5797    | 0.320   |
| 2     | 1.727     | 0.050     | 5.888      | 955119 | 1790025 | 98.960  |
| 3     | 2.092     | 0.050     | 7.285      | 1815   | 3367    | 0.186   |
| 4     | 2.320     | 0.050     | 4.541      | 1350   | 2406    | 0.133   |
| 5     | 3.061     | 0.056     | 13.970     | 1520   | 2953    | 0.163   |
| 6     | 5.117     | 0.066     | 33.658     | 1777   | 4282    | 0.237   |
| Total |           |           |            | 964637 | 1808830 | 100.000 |

Operator : \_\_\_\_\_

Date : \_\_\_\_\_

# HPLC REPORT

Compound ID : GK-D1  
 Sample ID : EW14183-3-P1B  
 Filename : D:\DATA\2018\1809\180905\EW14183-3-P1B.lcd  
 Method Name : D:\Method\10-80AB\_6min.lcm  
 Instrument & Column : HPLC-N  
 Run time : 2018-09-05 13:53:48

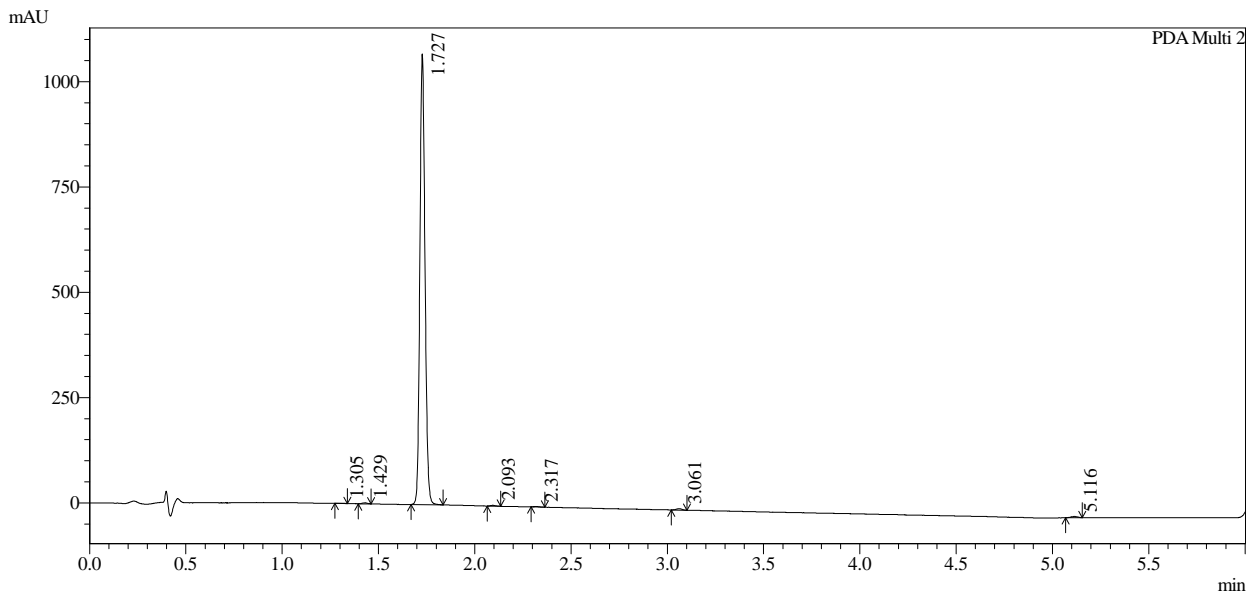

1 PDA Multi 2 / 215nm,4nm

-----  
 Integration result  
 -----

PeakTable

PDA Ch2 215nm

| Peak# | Ret. Time | USP Width | Resolution | Height  | Area    | Area %  |
|-------|-----------|-----------|------------|---------|---------|---------|
| 1     | 1.305     | 0.056     | 0.000      | 706     | 1402    | 0.070   |
| 2     | 1.429     | 0.050     | 2.320      | 2519    | 4568    | 0.227   |
| 3     | 1.727     | 0.050     | 5.950      | 1069954 | 1986426 | 98.664  |
| 4     | 2.093     | 0.048     | 7.460      | 1929    | 3447    | 0.171   |
| 5     | 2.317     | 0.051     | 4.507      | 1290    | 2463    | 0.122   |
| 6     | 3.061     | 0.056     | 13.947     | 3489    | 7144    | 0.355   |
| 7     | 5.116     | 0.067     | 33.584     | 3067    | 7873    | 0.391   |
| Total |           |           |            | 1082953 | 2013323 | 100.000 |

Operator : \_\_\_\_\_

Date : \_\_\_\_\_

# HPLC REPORT

Compound ID : GK-D1  
 Sample ID : EW14183-3-P1B  
 Filename : D:\DATA\2018\1809\180905\EW14183-3-P1B.lcd  
 Method Name : D:\Method\10-80AB\_6min.lcm  
 Instrument & Column : HPLC-N  
 Run time : 2018-09-05 13:53:48

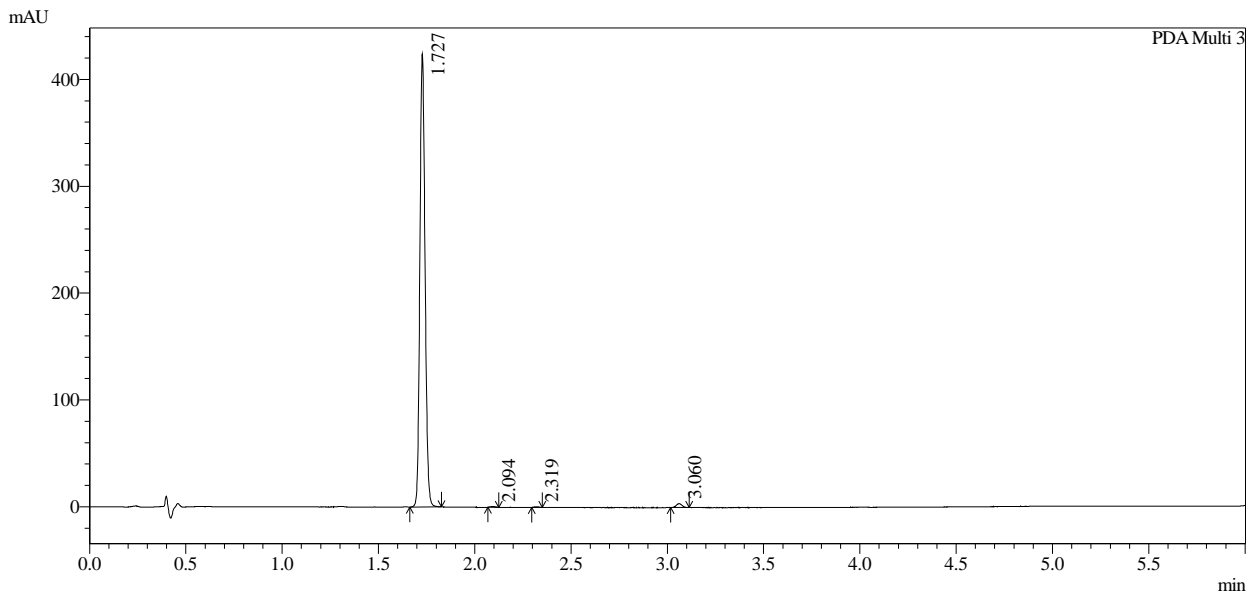

1 PDA Multi 3 / 254nm,4nm

-----  
 Integration result  
 -----

PeakTable

PDA Ch3 254nm

| Peak# | Ret. Time | USP Width | Resolution | Height | Area   | Area %  |
|-------|-----------|-----------|------------|--------|--------|---------|
| 1     | 1.727     | 0.050     | 0.000      | 424148 | 796095 | 98.765  |
| 2     | 2.094     | 0.047     | 7.529      | 764    | 1289   | 0.160   |
| 3     | 2.319     | 0.047     | 4.763      | 587    | 1041   | 0.129   |
| 4     | 3.060     | 0.056     | 14.286     | 3684   | 7625   | 0.946   |
| Total |           |           |            | 429182 | 806050 | 100.000 |

Operator : \_\_\_\_\_

Date : \_\_\_\_\_

EW13860-41-P1B DMSO Bruker\_F\_400MHz

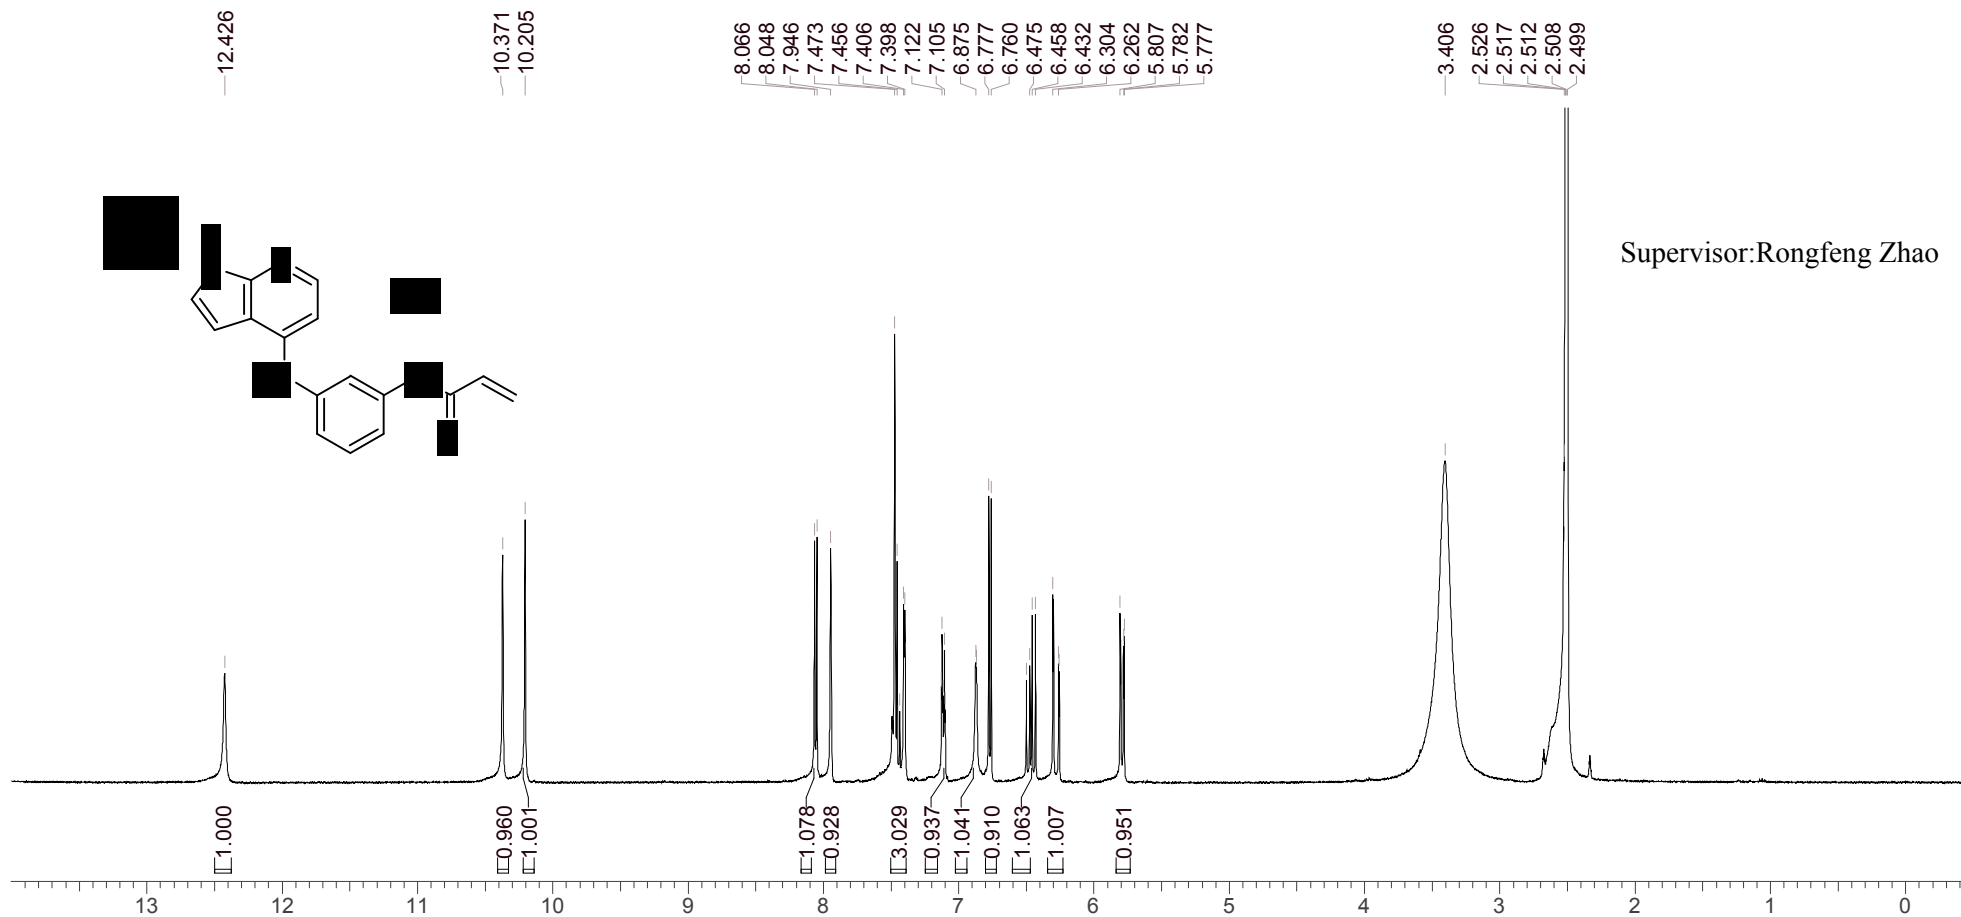

Operator:

Date:

If you

[Redacted text]

Compound ID: GK-D2

EW13860-41-P1C DMSO Bruker\_F\_400MHz

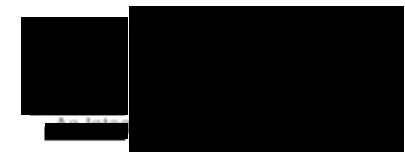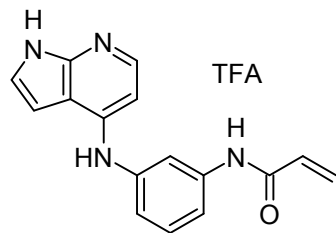

Supervisor: Rongfeng Zhao

-73.612

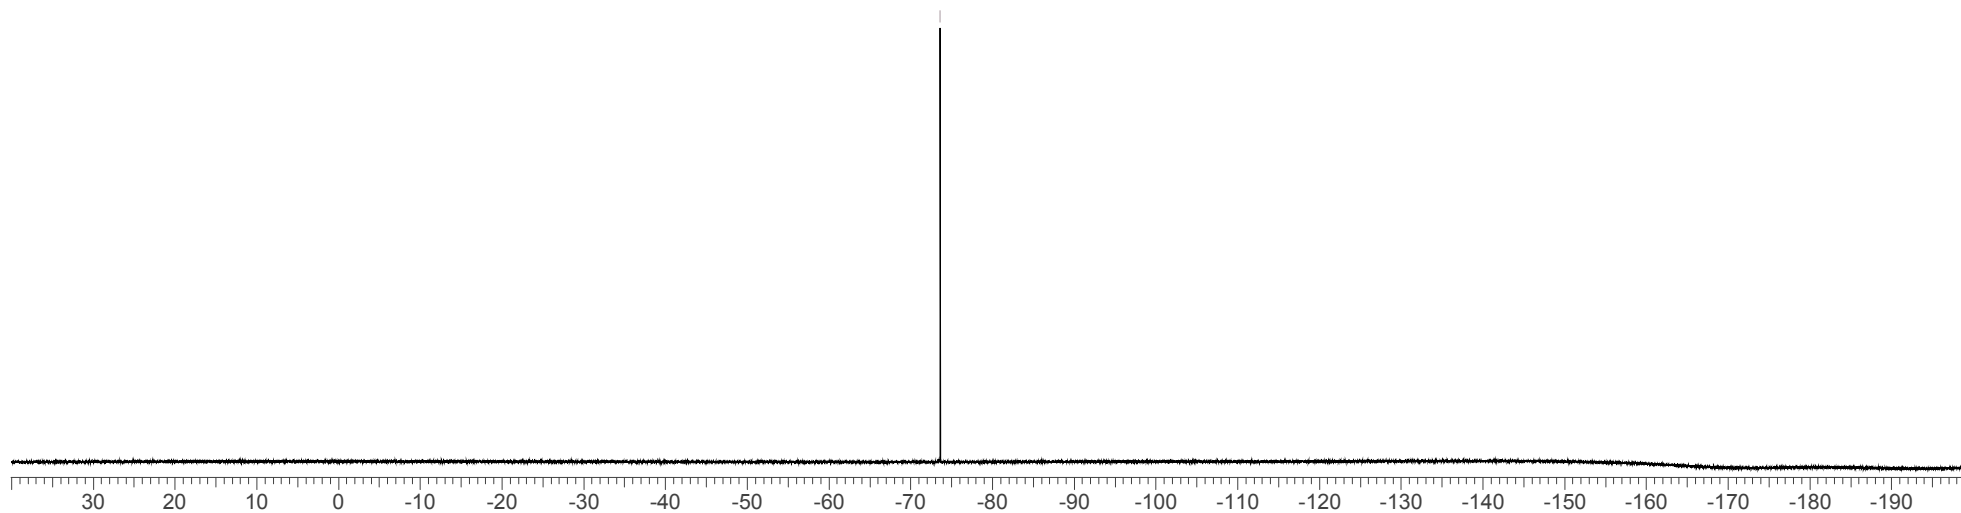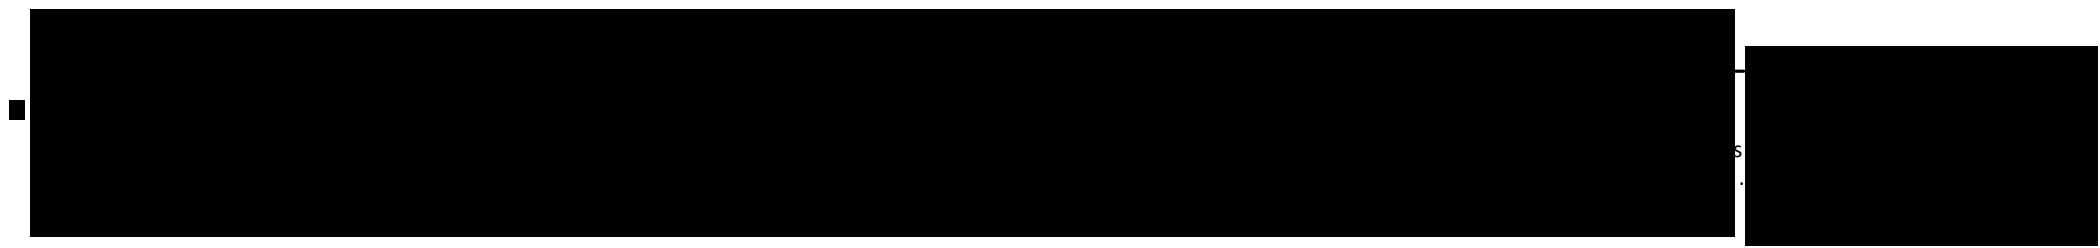

# LCMS REPORT

---

Compound ID : GK-D2  
 Sample ID : EW13860-41-P1F  
 Injection Vol : 5ul  
 Location : vial50  
 Acq Method : d:\method\5-95CD\_R\_220&254\_POS.lcm  
 Org DataFile : D:\DATA\1809\180907\EW13860-41-P1F.lcd  
 Injection Date : 2018-09-07 13:21:24  
 Instrument : LCMS-M 17-102

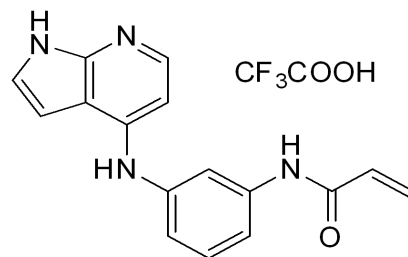

Exact Mass: 392.11

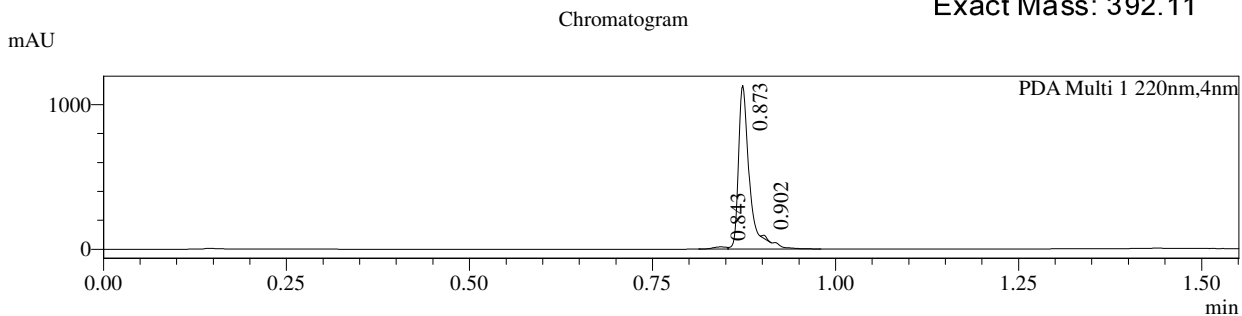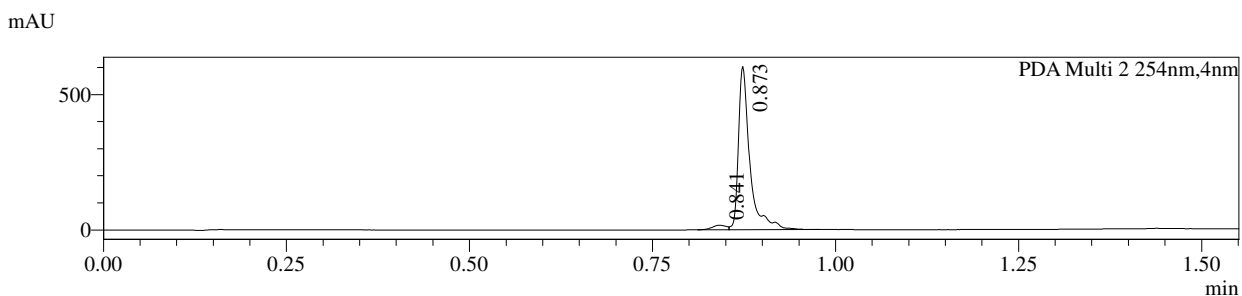

- 1 PDA Multi 1 / 220nm,4nm
- 2 PDA Multi 2 / 254nm,4nm

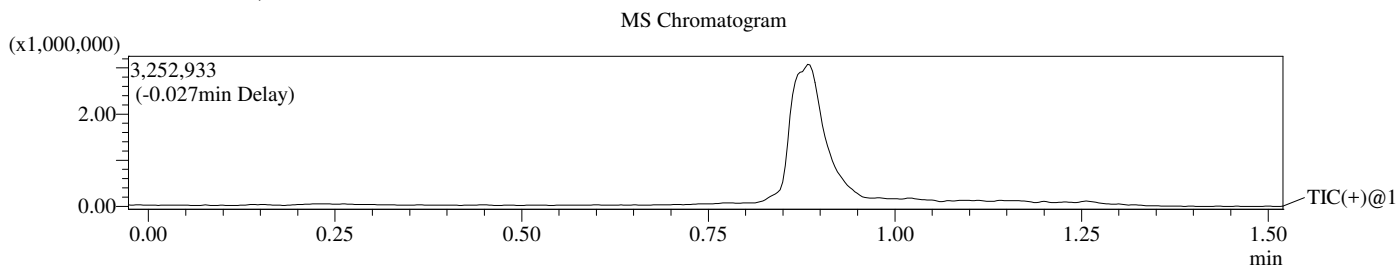


---

### Integration Result

---

#### Peak Table

PDA Ch1 220nm

| Peak# | Ret. Time | Height  | Height% | USP Width | Area    | Area%  |
|-------|-----------|---------|---------|-----------|---------|--------|
| 1     | 0.843     | 14523   | 1.246   | 0.056     | 19251   | 1.569  |
| 2     | 0.873     | 1130362 | 96.943  | 0.027     | 1199911 | 97.780 |
| 3     | 0.902     | 21125   | 1.812   | 0.012     | 7986    | 0.651  |

#### Peak Table

PDA Ch2 254nm

| Peak# | Ret. Time | Height | Height% | USP Width | Area   | Area%  |
|-------|-----------|--------|---------|-----------|--------|--------|
| 1     | 0.841     | 16298  | 2.635   | 0.050     | 22184  | 3.282  |
| 2     | 0.873     | 602249 | 97.365  | 0.027     | 653724 | 96.718 |

Operator: \_\_\_\_\_

Date: \_\_\_\_\_



Mass Spectrum

RefTime: 0.843 Datafile: D:\DATA\1809\180907\EW13860-41-P1F.lcd

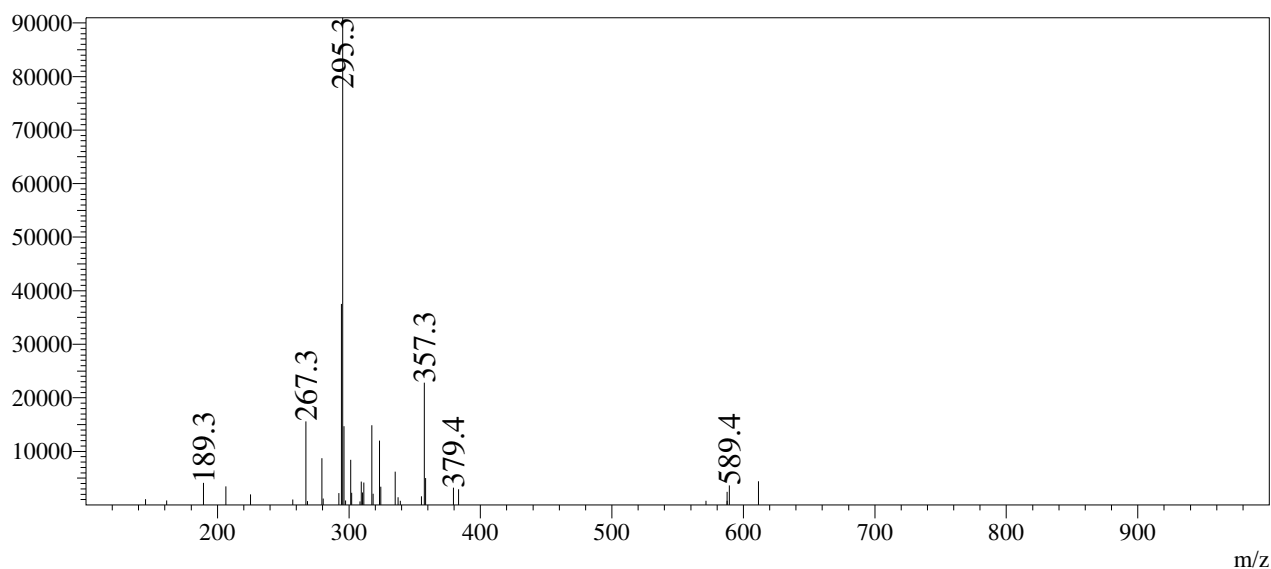

RefTime: 0.873 Datafile: D:\DATA\1809\180907\EW13860-41-P1F.lcd

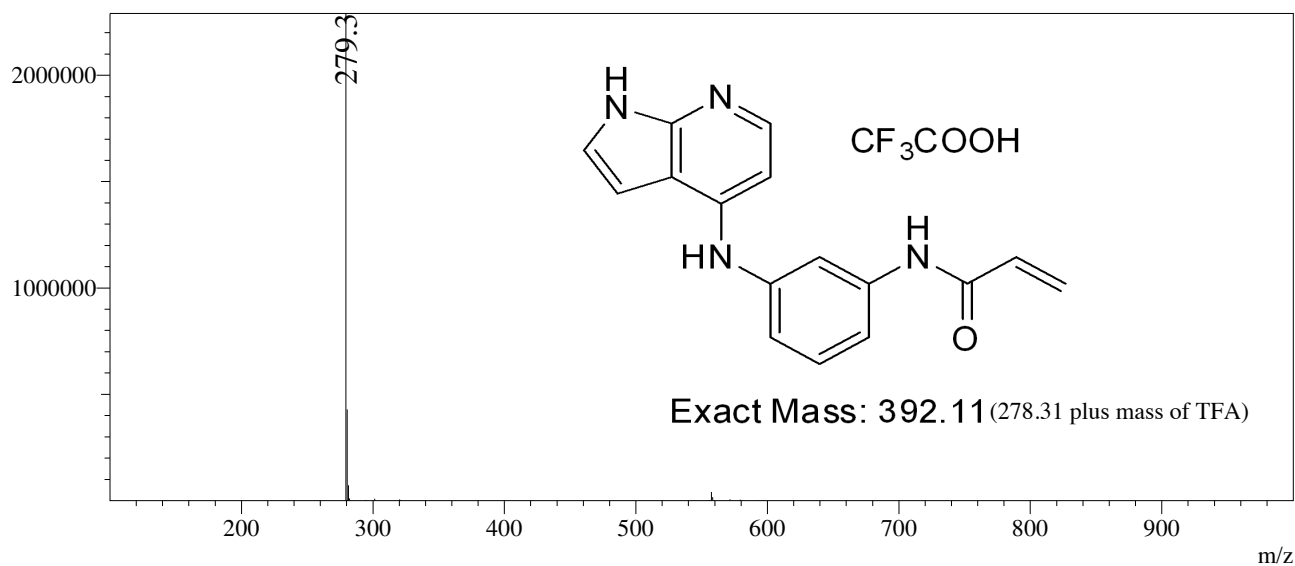

RefTime: 0.903 Datafile: D:\DATA\1809\180907\EW13860-41-P1F.lcd

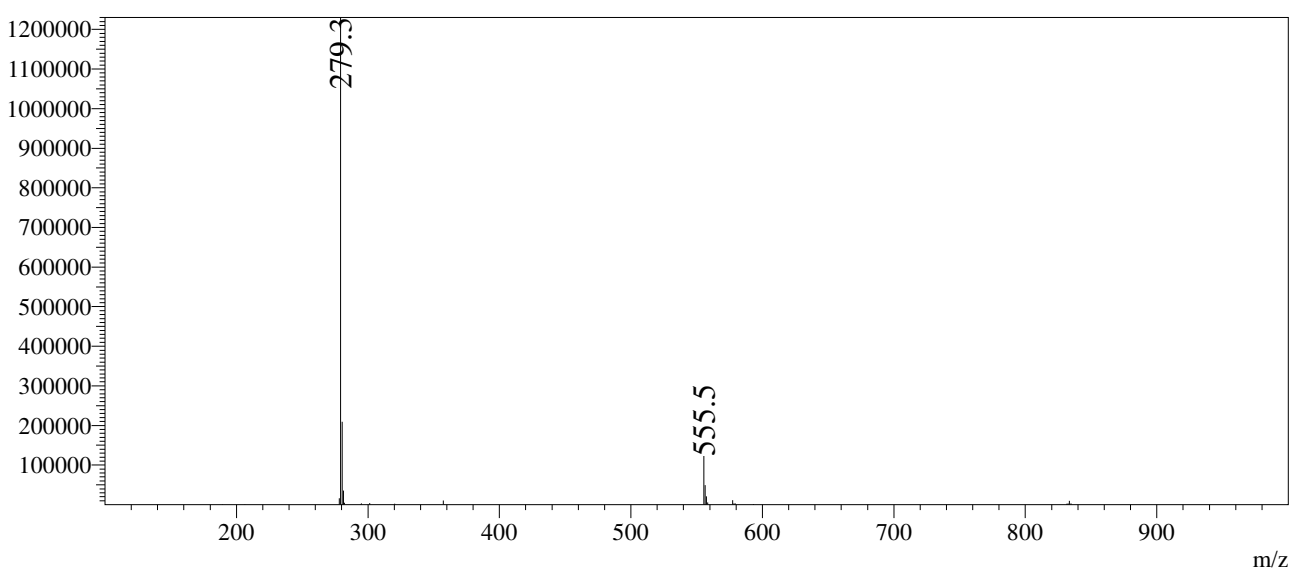

# HPLC REPORT

Compound ID : GK-D2  
 Sample ID : EW13860-41-P1A  
 Vial# : 87  
 Injection Volumn : 3  
 Filename : D:\DATA\2018\1809\180907\EW13860-41-P1A.lcd  
 Method Name : D:\Method\10-80CD\_4min.lcm  
 Instrument : HPLC-J  
 Run time : 9/7/2018 11:30:02

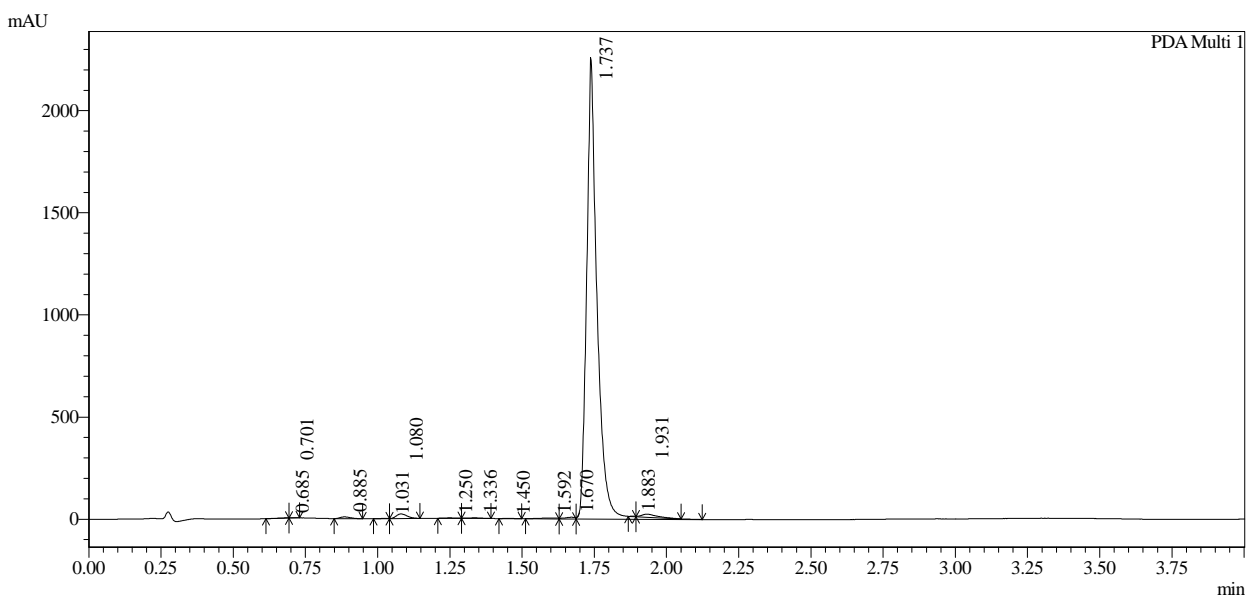

Integration result

PeakTable

| Peak# | Ret. Time | USP Width | Resolution | Height  | Area    | Area %  |
|-------|-----------|-----------|------------|---------|---------|---------|
| 1     | 0.685     | 0.101     | 0.000      | 1942    | 5471    | 0.093   |
| 2     | 0.701     | 0.068     | 0.182      | 1585    | 2214    | 0.038   |
| 3     | 0.885     | 0.068     | 2.693      | 8834    | 21770   | 0.369   |
| 4     | 1.031     | 0.071     | 2.110      | 1304    | 2306    | 0.039   |
| 5     | 1.080     | 0.070     | 0.698      | 22199   | 57773   | 0.980   |
| 6     | 1.250     | 0.089     | 2.141      | 2538    | 7674    | 0.130   |
| 7     | 1.336     | 0.106     | 0.874      | 2914    | 9759    | 0.165   |
| 8     | 1.450     | 0.065     | 1.343      | 1340    | 3134    | 0.053   |
| 9     | 1.592     | 0.185     | 1.139      | 4319    | 17911   | 0.304   |
| 10    | 1.670     | 0.118     | 0.510      | 8511    | 21644   | 0.367   |
| 11    | 1.737     | 0.064     | 0.737      | 2259744 | 5689810 | 96.476  |
| 12    | 1.883     | 0.000     | 0.000      | 1479    | 1928    | 0.033   |
| 13    | 1.931     | 0.098     | 0.000      | 15117   | 56257   | 0.954   |
| Total |           |           |            | 2331828 | 5897650 | 100.000 |

Operator : \_\_\_\_\_

Date : \_\_\_\_\_

# HPLC REPORT

Compound ID : GK-D2  
 Sample ID : EW13860-41-P1A  
 Filename : D:\DATA\2018\1809\180907\EW13860-41-P1A.lcd  
 Method Name : D:\Method\10-80CD\_4min.lcm  
 Instrument & Column : HPLC-J  
 Run time : 9/7/2018 11:30:02

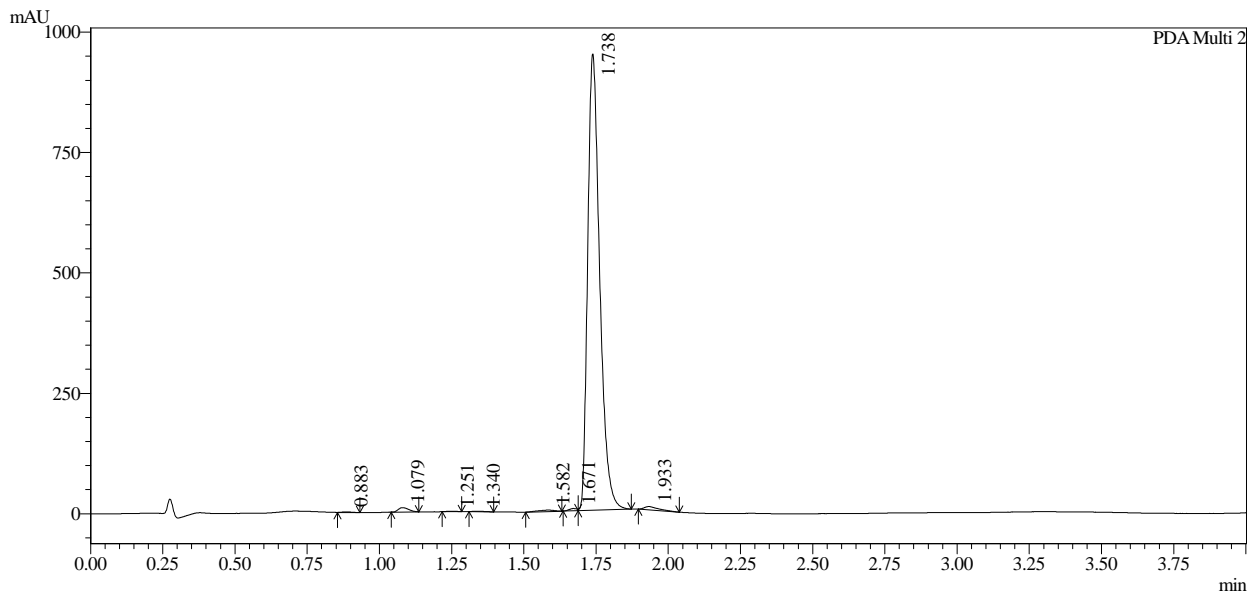

1 PDA Multi 2 / 254nm,4nm

-----  
 Integration result  
 -----

PeakTable

| PDA Ch2 254nm |           |           |            |        |         |         |
|---------------|-----------|-----------|------------|--------|---------|---------|
| Peak#         | Ret. Time | USP Width | Resolution | Height | Area    | Area %  |
| 1             | 0.883     | 0.060     | 0.000      | 1141   | 2610    | 0.093   |
| 2             | 1.079     | 0.069     | 3.042      | 9313   | 23538   | 0.836   |
| 3             | 1.251     | 0.063     | 2.602      | 981    | 2164    | 0.077   |
| 4             | 1.340     | 0.065     | 1.404      | 1085   | 2650    | 0.094   |
| 5             | 1.582     | 0.120     | 2.616      | 2930   | 11977   | 0.426   |
| 6             | 1.671     | 0.067     | 0.945      | 4675   | 8842    | 0.314   |
| 7             | 1.738     | 0.076     | 0.938      | 947441 | 2738252 | 97.293  |
| 8             | 1.933     | 0.102     | 2.183      | 6780   | 24394   | 0.867   |
| Total         |           |           |            | 974348 | 2814426 | 100.000 |

Operator : \_\_\_\_\_

Date : \_\_\_\_\_

# HPLC REPORT

Compound ID : GK-D2  
 Sample ID : EW13860-41-P1A  
 Filename : D:\DATA\2018\1809\180907\EW13860-41-P1A.lcd  
 Method Name : D:\Method\10-80CD\_4min.lcm  
 Instrument & Column : HPLC-J  
 Run time : 9/7/2018 11:30:02

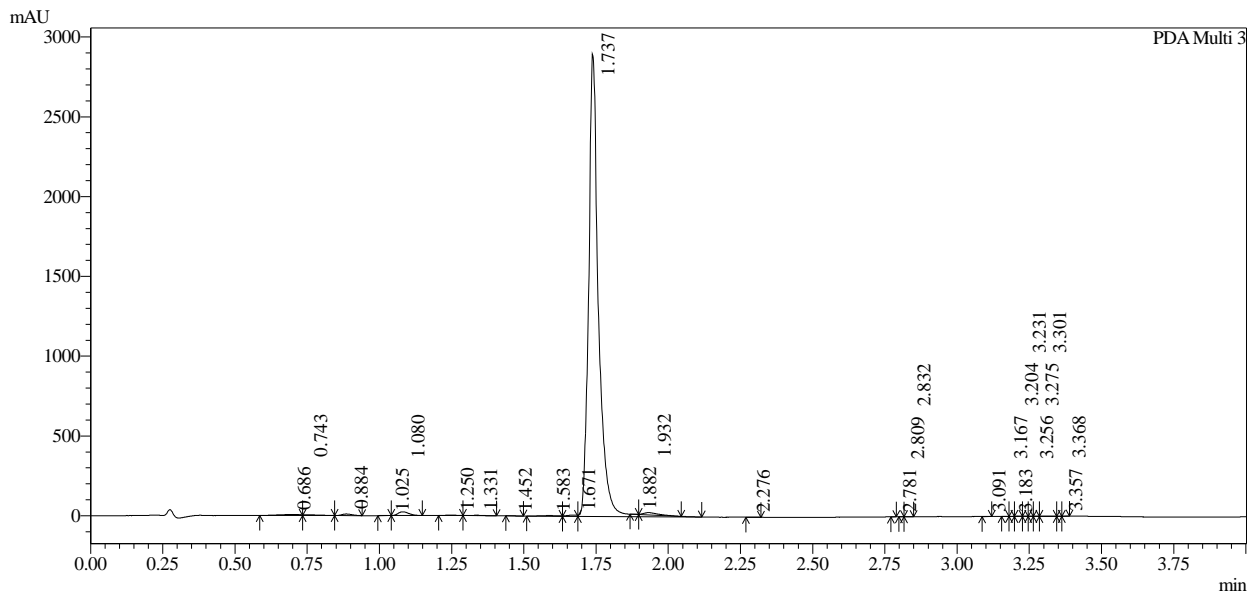

1 PDA Multi 3 / 215nm,4nm

-----  
 Integration result  
 -----

PeakTable

PDA Ch3 215nm

| Peak# | Ret. Time | USP Width | Resolution | Height  | Area    | Area % |
|-------|-----------|-----------|------------|---------|---------|--------|
| 1     | 0.686     | 0.295     | 0.000      | 6000    | 32660   | 0.454  |
| 2     | 0.743     | 0.276     | 0.200      | 4926    | 16460   | 0.229  |
| 3     | 0.884     | 0.069     | 0.819      | 9964    | 24837   | 0.346  |
| 4     | 1.025     | 0.055     | 2.269      | 1307    | 2463    | 0.034  |
| 5     | 1.080     | 0.070     | 0.873      | 23677   | 61379   | 0.854  |
| 6     | 1.250     | 0.066     | 2.507      | 2025    | 5052    | 0.070  |
| 7     | 1.331     | 0.085     | 1.076      | 2417    | 7674    | 0.107  |
| 8     | 1.452     | 0.039     | 1.949      | 1044    | 1693    | 0.024  |
| 9     | 1.583     | 0.218     | 1.025      | 4405    | 20077   | 0.279  |
| 10    | 1.671     | 0.144     | 0.484      | 8566    | 20501   | 0.285  |
| 11    | 1.737     | 0.052     | 0.677      | 2898622 | 6910151 | 96.140 |
| 12    | 1.882     | 0.000     | 0.000      | 1477    | 2372    | 0.033  |
| 13    | 1.932     | 0.102     | 0.000      | 15345   | 56288   | 0.783  |
| 14    | 2.276     | 0.092     | 3.540      | 837     | 1954    | 0.027  |
| 15    | 2.781     | 0.068     | 6.333      | 1078    | 1105    | 0.015  |
| 16    | 2.809     | 0.044     | 0.504      | 1324    | 1225    | 0.017  |
| 17    | 2.832     | 0.055     | 0.455      | 666     | 1066    | 0.015  |
| 18    | 3.091     | 0.082     | 3.772      | 578     | 1081    | 0.015  |
| 19    | 3.167     | 0.101     | 0.831      | 1115    | 1600    | 0.022  |
| 20    | 3.183     | 0.040     | 0.227      | 1233    | 1369    | 0.019  |

| Peak# | Ret. Time | USP Width | Resolution | Height  | Area    | Area %  |
|-------|-----------|-----------|------------|---------|---------|---------|
| 21    | 3.204     | 0.084     | 0.345      | 1214    | 2030    | 0.028   |
| 22    | 3.231     | 0.000     | 0.000      | 1461    | 1649    | 0.023   |
| 23    | 3.256     | 0.169     | 0.000      | 1652    | 1662    | 0.023   |
| 24    | 3.275     | 0.150     | 0.117      | 1828    | 2283    | 0.032   |
| 25    | 3.301     | 0.883     | 0.051      | 1976    | 6370    | 0.089   |
| 26    | 3.357     | 0.342     | 0.092      | 1182    | 1252    | 0.017   |
| 27    | 3.368     | 0.073     | 0.051      | 1045    | 1365    | 0.019   |
| Total |           |           |            | 2996964 | 7187616 | 100.000 |

Operator : \_\_\_\_\_

Date : \_\_\_\_\_

Compound ID: GK-D3

EW13998-13-P1B CDCl3 Bruker\_D\_400MHz

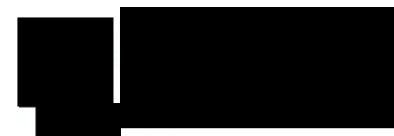

8.359  
7.434  
7.298  
7.284  
7.277  
7.202  
7.159  
7.140  
7.132  
7.126  
7.120  
6.854  
6.758  
6.739  
6.442  
6.421  
6.379  
6.198  
5.749  
5.724  
5.320

1.677  
1.660  
1.330  
1.306  
1.282  
-0.907  
-0.099

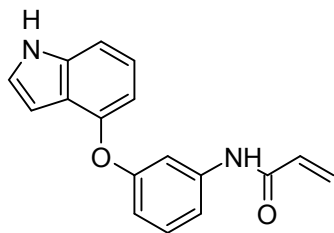

Supervisor: Rongfeng Zhao

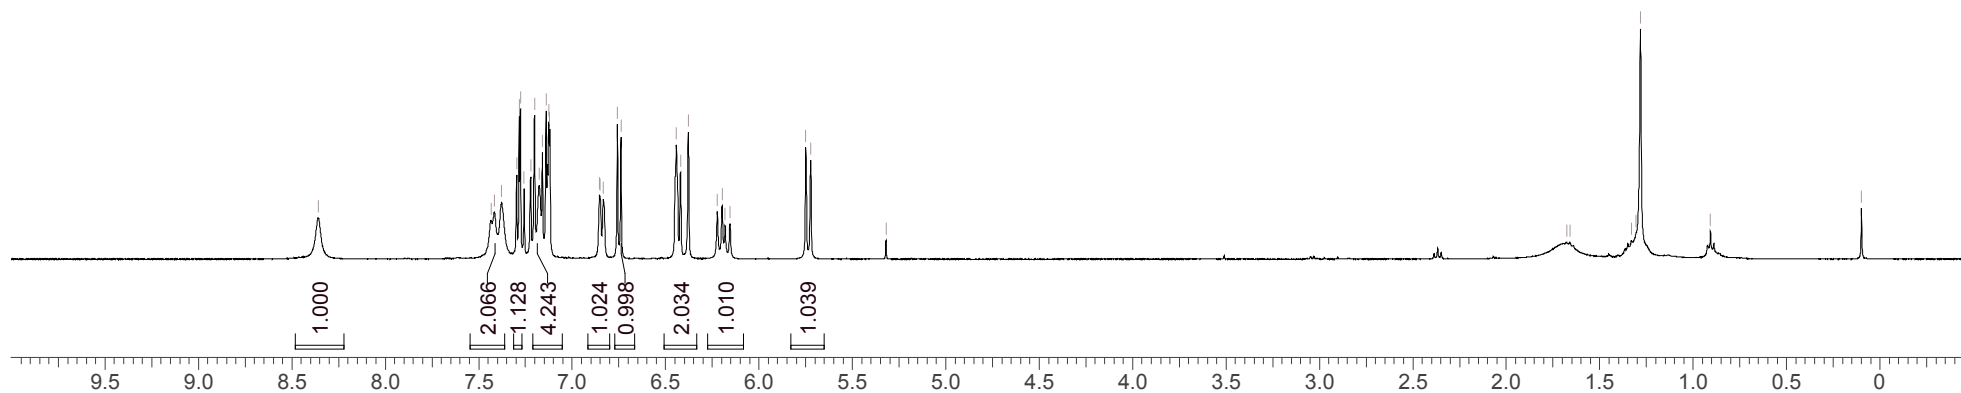

Operator:

Date:

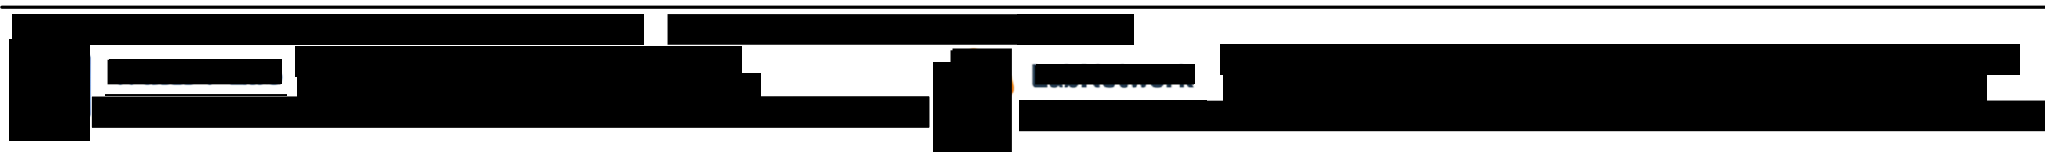

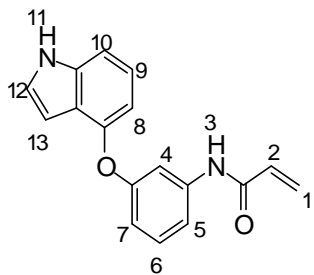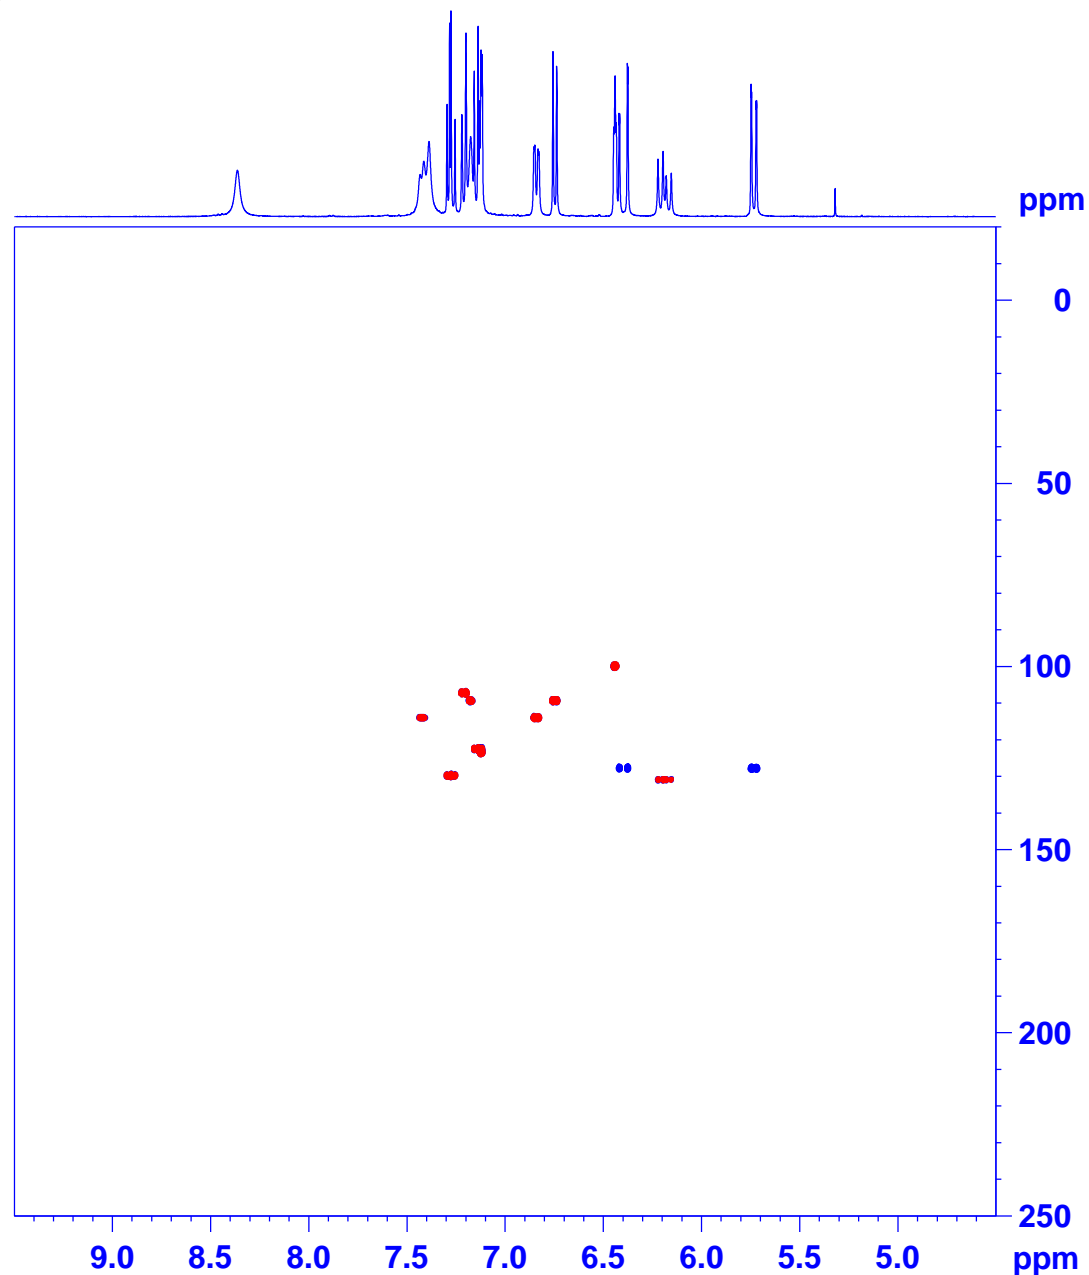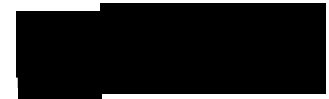

```

NAME          EW13998-13-P1B1
EXPNO         2
PROCNO       1
Date_        20180914
Time         2.02
INSTRUM      spect
PROBHD       5 mm PABBO BB/
PULPROG      hsqcedetgp
TD           1024
SOLVENT      CDC13
NS           2
DS           16
SWH          2000.000 H
FIDRES       1.953125 H
AQ           0.2560500 s
RG           211.47
DW           250.000 u
DE           6.50 u
TE           298.2 K
CNST2        145.0000000
D0           0.00000300 s
D1           1.50000000 s
D4           0.00172414 s
D11          0.03000000 s
D13          0.00000400 s
D16          0.00020000 s
D21          0.00345000 s
IN0          0.00001840 s
ZGPTNS

===== CHANNEL f1 =====
SFO1         400.1328009 M
NUC1         1H
P1           9.45 u
P2           18.90 u
P28          1000.00 u
ND0          2
TD           256
SFO1         100.6243 M
FIDRES       106.148094 H
SW           270.053 p
FnMODE       Echo-Antiecho
SI           1024
SF           400.1300000 M
WDW          QSINE
SSB          2
LB           0.00 H
GB           0
PC           1.40
SI           1024
MC2          echo-antiecho
SF           100.6127685 M
WDW          QSINE
SSB          2
LB           0.00 H
GB           0
    
```



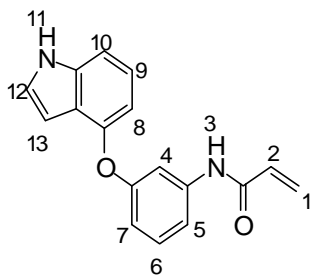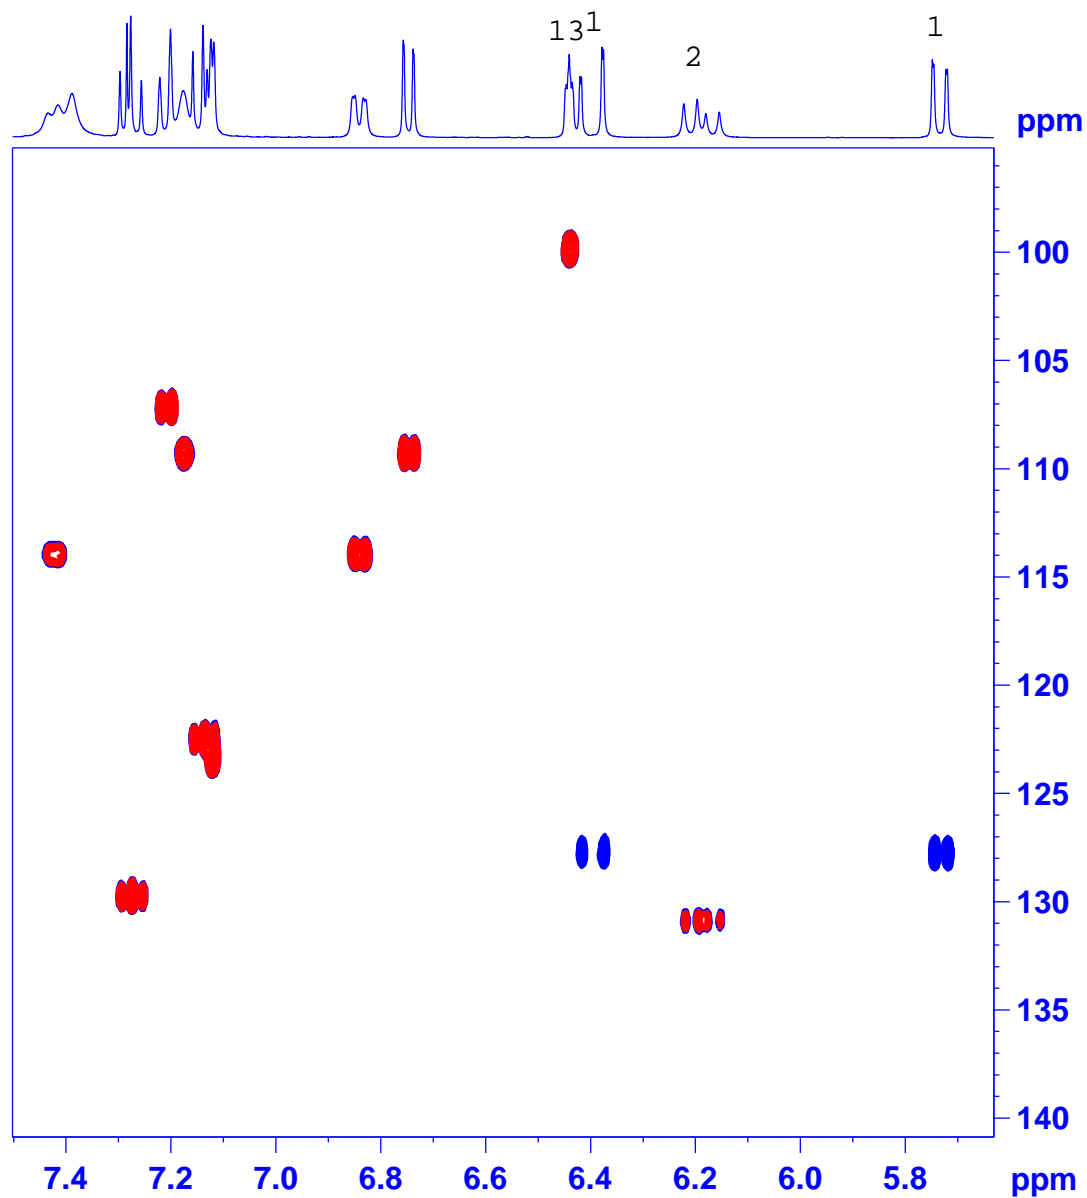

```

NAME      EW13998-13-P1B1
EXPNO     2
PROCNO    1
Date_     20180914
Time      2.02
INSTRUM   spect
PROBHD    5 mm PABBO BB/
PULPROG   hsqcedetgp
TD         1024
SOLVENT   CDC13
NS         2
DS         16
SWH       2000.000 H
FIDRES    1.953125 H
AQ         0.2560500 s
RG         211.47
DW         250.000 u
DE         6.50 u
TE         298.2 K
CNST2     145.0000000
D0         0.00000300 s
D1         1.50000000 s
D4         0.00172414 s
D11        0.03000000 s
D13        0.00000400 s
D16        0.00020000 s
D21        0.00345000 s
IN0        0.00001840 s
ZGPTNS

===== CHANNEL f1 =====
SFO1      400.1328009 M
NUC1       1H
P1         9.45 u
P2         18.90 u
P28        1000.00 u
ND0         2
TD         256
SFO1      100.6243 M
FIDRES    106.148094 H
SW         270.053 p
FnMODE    Echo-Antiecho
SI         1024
SF         400.1300000 M
WDW        QSINE
SSB         2
LB         0.00 H
GB         0
PC         1.40
SI         1024
MC2       echo-antiecho
SF         100.6127685 M
WDW        QSINE
SSB         2
LB         0.00 H
GB         0
    
```

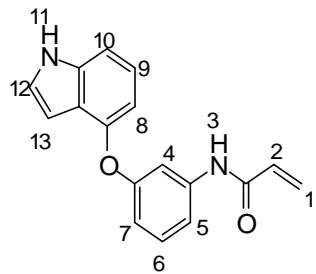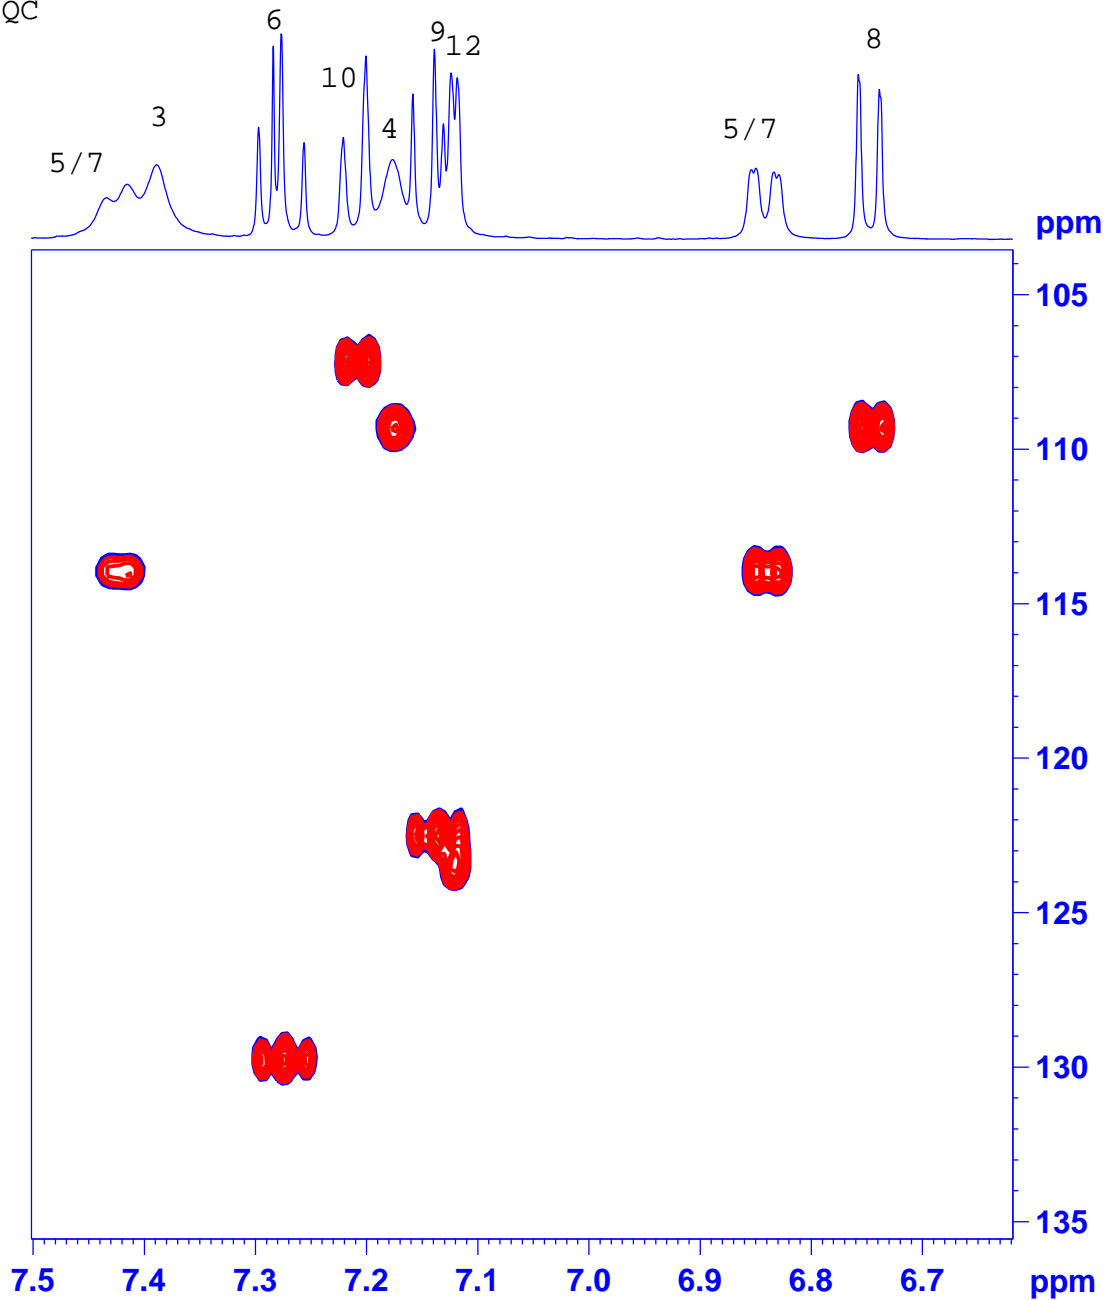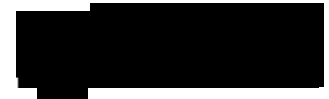

```

NAME          EW13998-13-P1B1
EXPNO         2
PROCNO        1
Date_         20180914
Time          2.02
INSTRUM       spect
PROBHD        5 mm PABBO BB/
PULPROG       hsqcedetgp
TD            1024
SOLVENT       CDC13
NS            2
DS            16
SWH           2000.000 H
FIDRES        1.953125 H
AQ            0.2560500 s
RG            211.47
DW            250.000 u
DE            6.50 u
TE            298.2 K
CNST2         145.0000000
D0            0.00000300 s
D1            1.50000000 s
D4            0.00172414 s
D11           0.03000000 s
D13           0.00000400 s
D16           0.00020000 s
D21           0.00345000 s
IN0           0.00001840 s
ZGOPTNS

===== CHANNEL f1 =====
SFO1          400.1328009 M
NUC1          1H
P1            9.45 u
P2            18.90 u
P28           1000.00 u
ND0           2
TD            256
SFO1          100.6243 M
FIDRES        106.148094 H
SW            270.053 p
FnMODE        Echo-Antiecho
SI            1024
SF            400.1300000 M
WDW           QSINE
SSB           2
LB            0.00 H
GB            0
PC            1.40
SI            1024
MC2           echo-antiecho
SF            100.6127685 M
WDW           QSINE
SSB           2
LB            0.00 H
GB            0
    
```

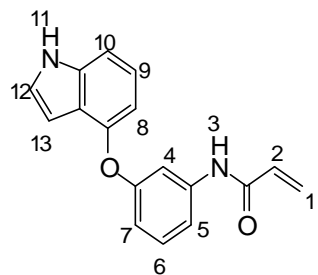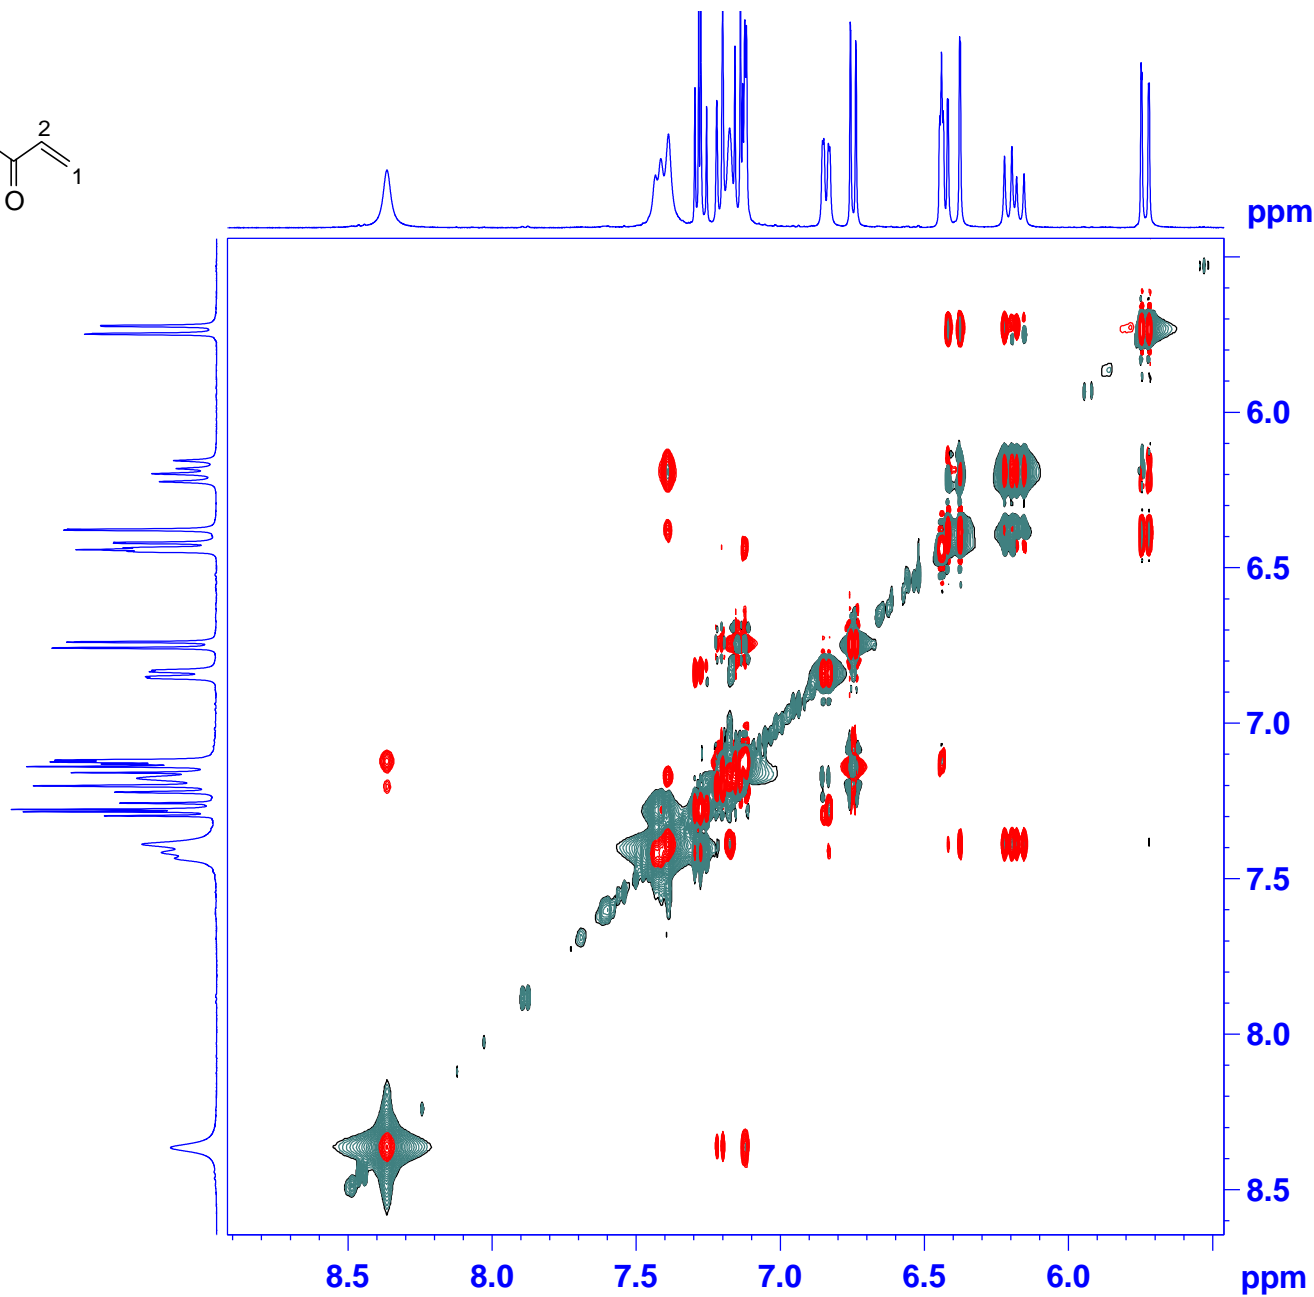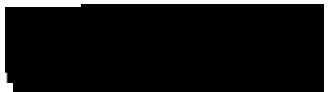

```

NAME      EW13998-13-P1B1
EXPNO     3
PROCNO    1
Date_     20180914
Time      2.18
INSTRUM   spect
PROBHD    5 mm PABBO BB/
PULPROG   noesygpph
TD         2048
SOLVENT   CDC13
NS         8
DS         8
SWH        2000.000 Hz
FIDRES     0.976563 Hz
AQ         0.5120500 sec
RG         117.79
DW         250.000 usec
DE         6.50 usec
TE         298.2 K
D0         0.00023787 sec
D1         1.79999995 sec
D8         0.80000001 sec
D16        0.00020000 sec
IN0        0.00049980 sec
    
```

```

===== CHANNEL f1 =====
SFO1      400.1328009 MHz:
NUC1       1H
P1         9.45 usec
P2        18.90 usec
ND0        1
TD         200
SFO1      400.1328 MHz:
FIDRES     10.004002 Hz
SW         5,000 ppr
FnMODE     States-TPPI
SI         1024
SF         400.1300000 MHz:
WDW        QSINE
SSB        2
LB         0.00 Hz
GB         0
PC         1.40
SI         1024
MC2        States-TPPI
SF         400.1300000 MHz:
WDW        QSINE
SSB        2
LB         0.00 Hz
GB         0
    
```

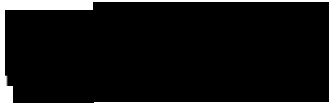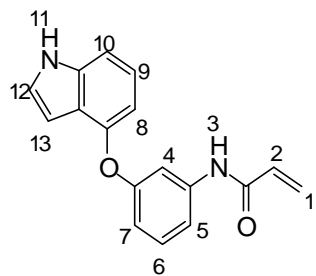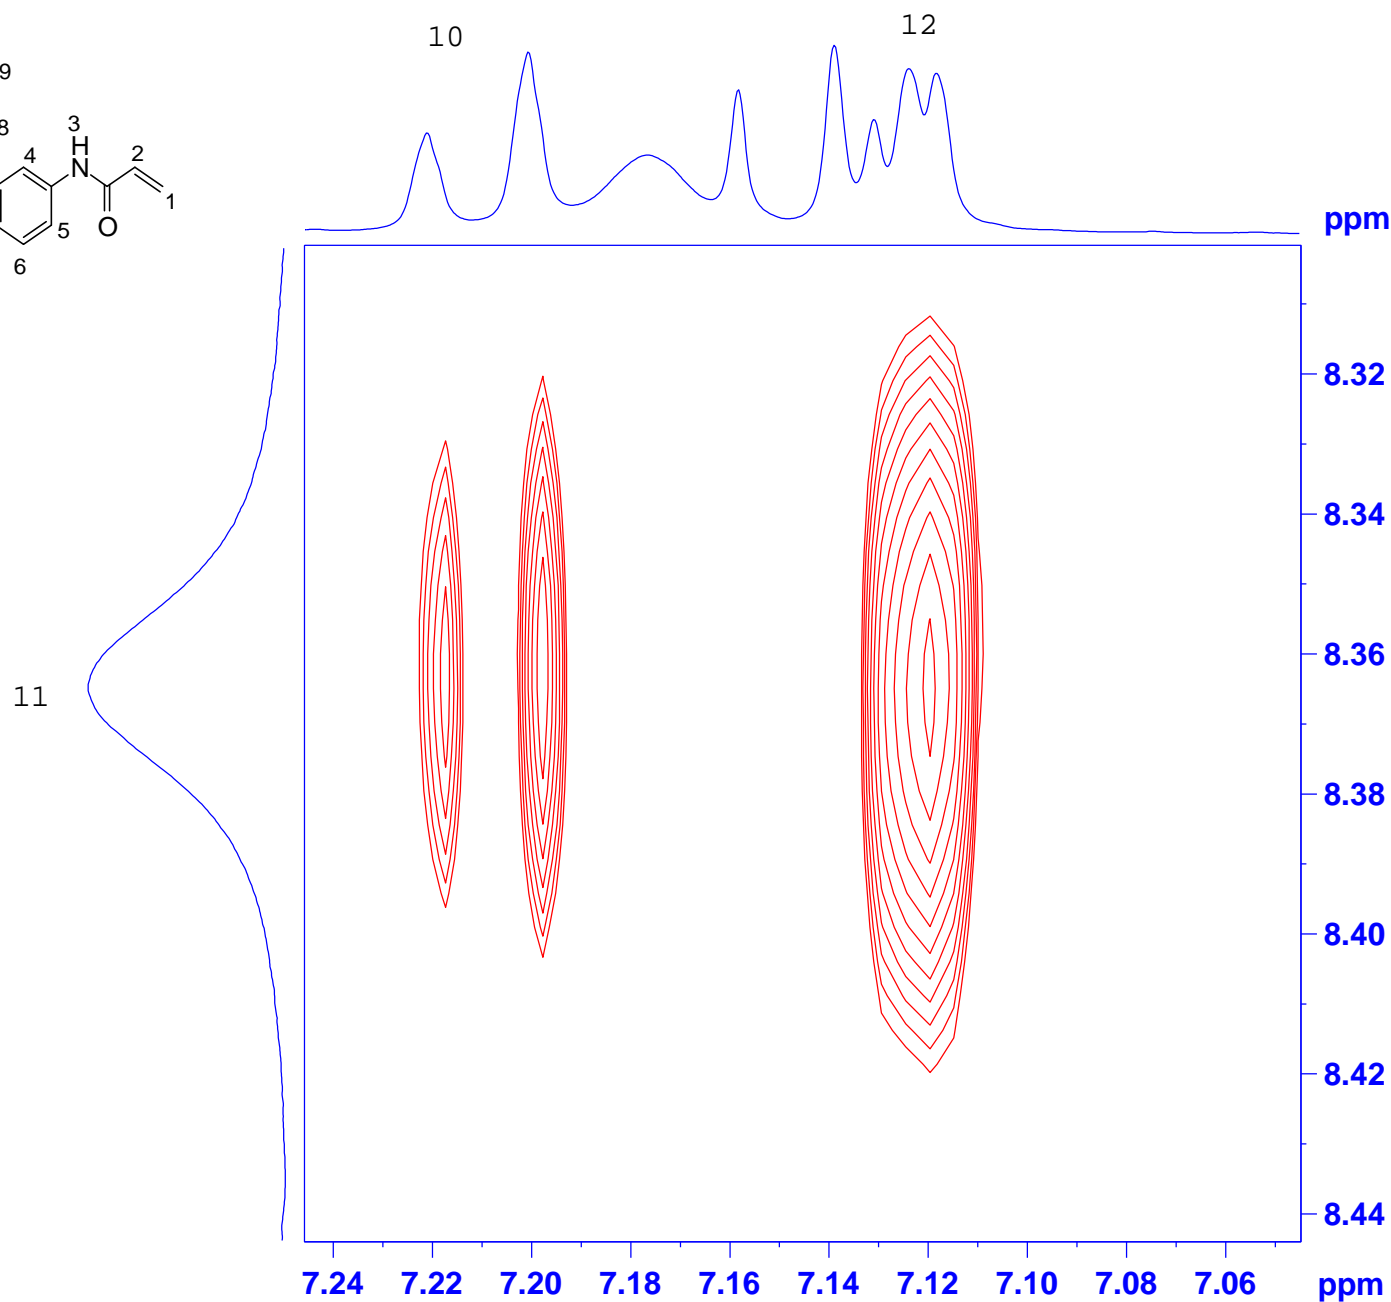

```

NAME      EW13998-13-P1B1
EXPNO     3
PROCNO    1
Date_     20180914
Time      2.18
INSTRUM   spect
PROBHD    5 mm PABBO BB/
PULPROG   noesygpqh
TD         2048
SOLVENT   CDCl3
NS         8
DS         8
SWH       2000.000 Hz
FIDRES    0.976563 Hz
AQ         0.5120500 sec
RG         117.79
DW         250.000 usec
DE         6.50 usec
TE         298.2 K
D0         0.00023787 sec
D1         1.79999995 sec
D8         0.80000001 sec
D16        0.00020000 sec
IN0        0.00049980 sec

===== CHANNEL f1 =====
SFO1      400.1328009 MHz
NUC1       1H
P1         9.45 usec
P2         18.90 usec
ND0        1
TD         200
SFO1      400.1328 MHz
FIDRES    10.004002 Hz
SW         5.000 ppr
FnMODE    States-TPPI
SI         1024
SF         400.1300000 MHz
WDW        QSINE
SSB        2
LB         0.00 Hz
GB         0
PC         1.40
SI         1024
MC2       States-TPPI
SF         400.1300000 MHz
WDW        QSINE
SSB        2
LB         0.00 Hz
GB         0
    
```

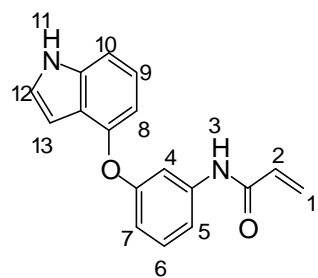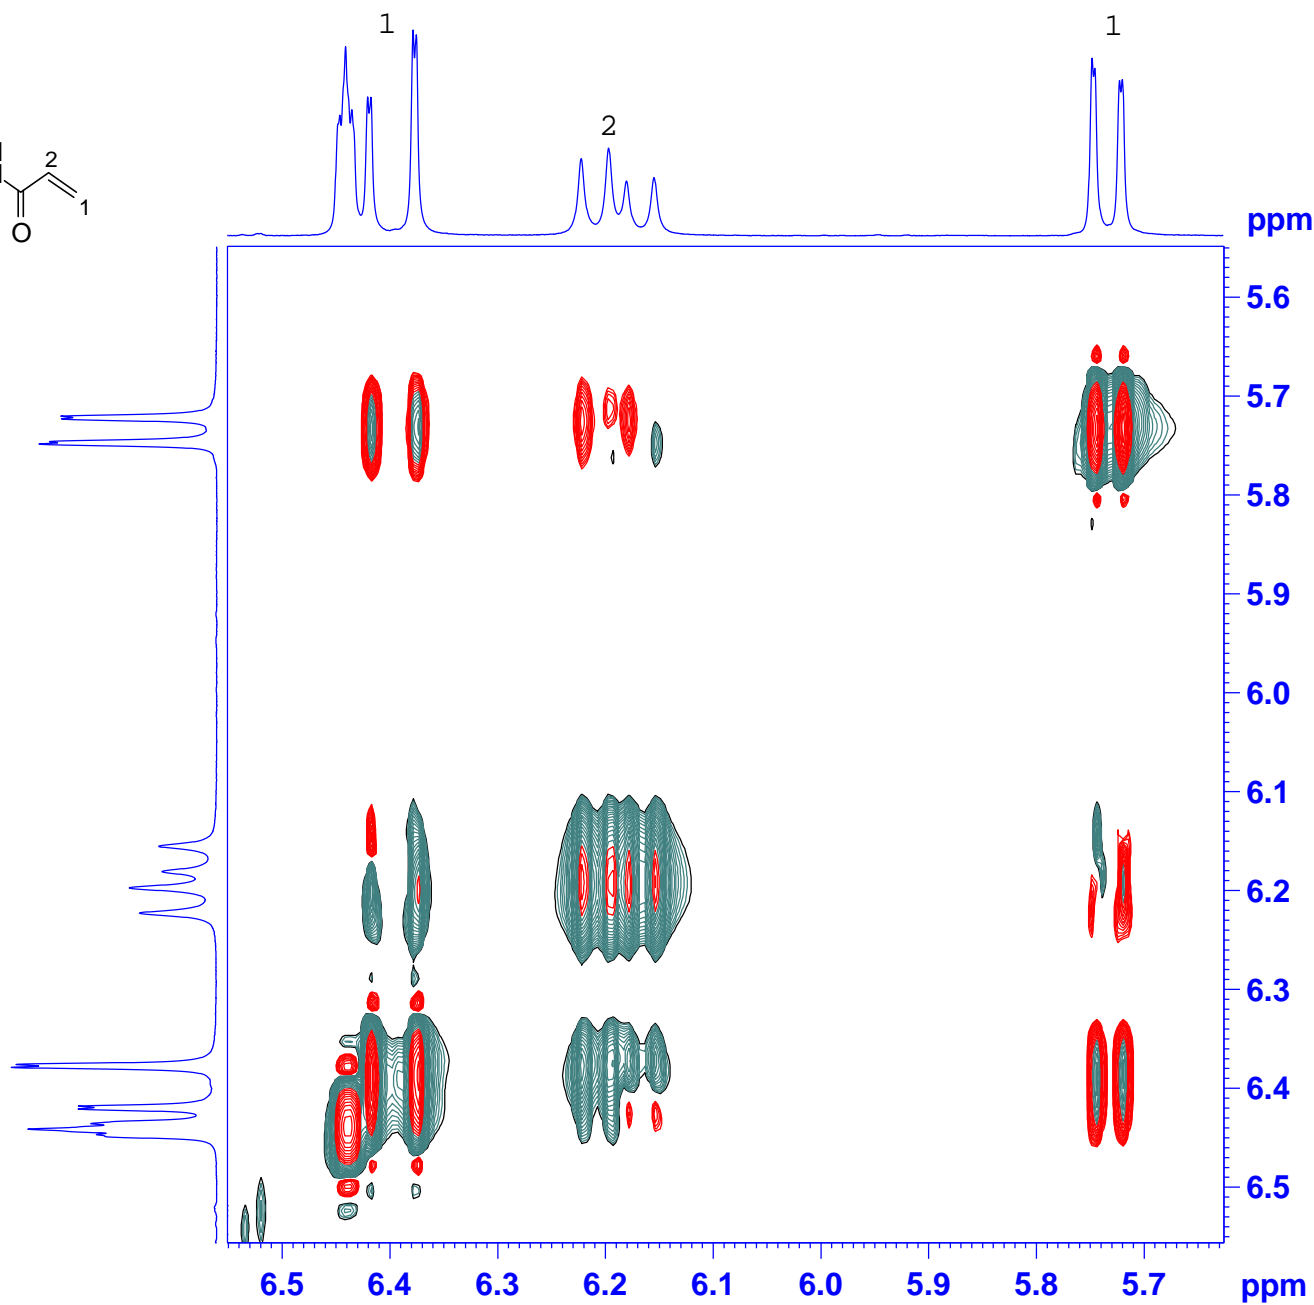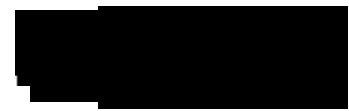

```

NAME      EW13998-13-P1B1
EXPNO     3
PROCNO    1
Date_     20180914
Time      2.18
INSTRUM   spect
PROBHD    5 mm PABBO BB/
PULPROG   noesygpqh
TD         2048
SOLVENT   CDCl3
NS         8
DS         8
SWH       2000.000 Hz
FIDRES    0.976563 Hz
AQ        0.5120500 sec
RG        117.79
DW        250.000 usec
DE        6.50 usec
TE        298.2 K
D0        0.00023787 sec
D1        1.79999995 sec
D8        0.80000001 sec
D16       0.00020000 sec
IN0       0.00049980 sec
    
```

```

===== CHANNEL f1 =====
SFO1    400.1328009 MHz
NUC1     1H
P1       9.45 usec
P2      18.90 usec
ND0       1
TD        200
SFO1    400.1328 MHz
FIDRES   10.004002 Hz
SW        5,000 ppr
FnMODE   States-TPPI
SI       1024
SF       400.1300000 MHz
WDW      QSINE
SSB       2
LB        0.00 Hz
GB         0
PC        1.40
SI       1024
MC2     States-TPPI
SF       400.1300000 MHz
WDW      QSINE
SSB       2
LB        0.00 Hz
GB         0
    
```

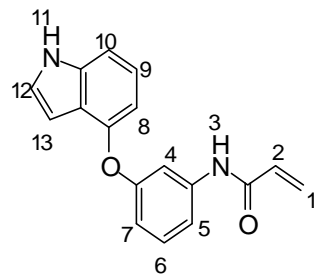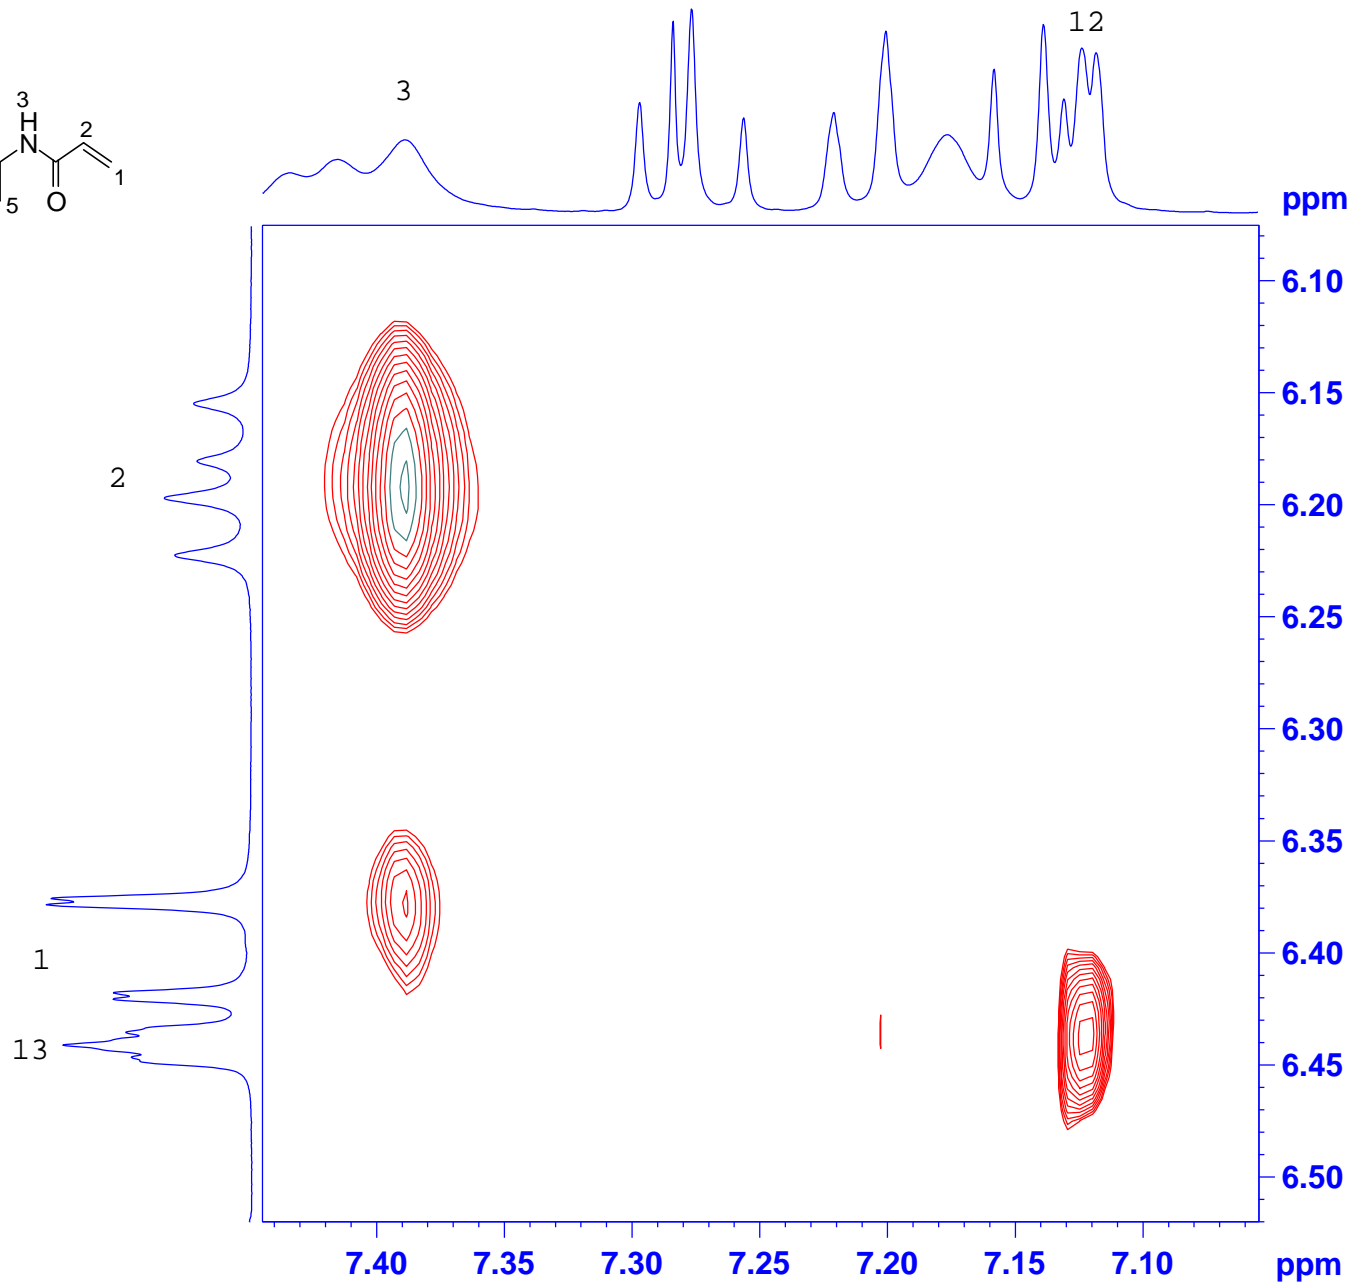

```

NAME      EW13998-13-P1B1
EXPNO     3
PROCNO    1
Date_     20180914
Time      2.18
INSTRUM   spect
PROBHD    5 mm PABBO BB/
PULPROG   noesygpqh
TD         2048
SOLVENT   CDCl3
NS         8
DS         8
SWH       2000.000 Hz
FIDRES    0.976563 Hz
AQ         0.5120500 sec
RG         117.79
DW         250.000 usec
DE         6.50 usec
TE         298.2 K
D0         0.00023787 sec
D1         1.79999995 sec
D8         0.80000001 sec
D16        0.00020000 sec
IN0        0.00049980 sec
    
```

```

===== CHANNEL f1 =====
SFO1     400.1328009 MHz
NUC1      1H
P1        9.45 usec
P2       18.90 usec
ND0        1
TD         200
SFO1     400.1328 MHz
FIDRES    10.004002 Hz
SW         5.000 ppr
FnMODE    States-TPPI
SI        1024
SF        400.1300000 MHz
WDW       QSINE
SSB        2
LB         0.00 Hz
GB         0
PC         1.40
SI        1024
MC2       States-TPPI
SF        400.1300000 MHz
WDW       QSINE
SSB        2
LB         0.00 Hz
GB         0
    
```

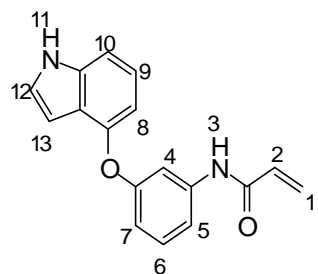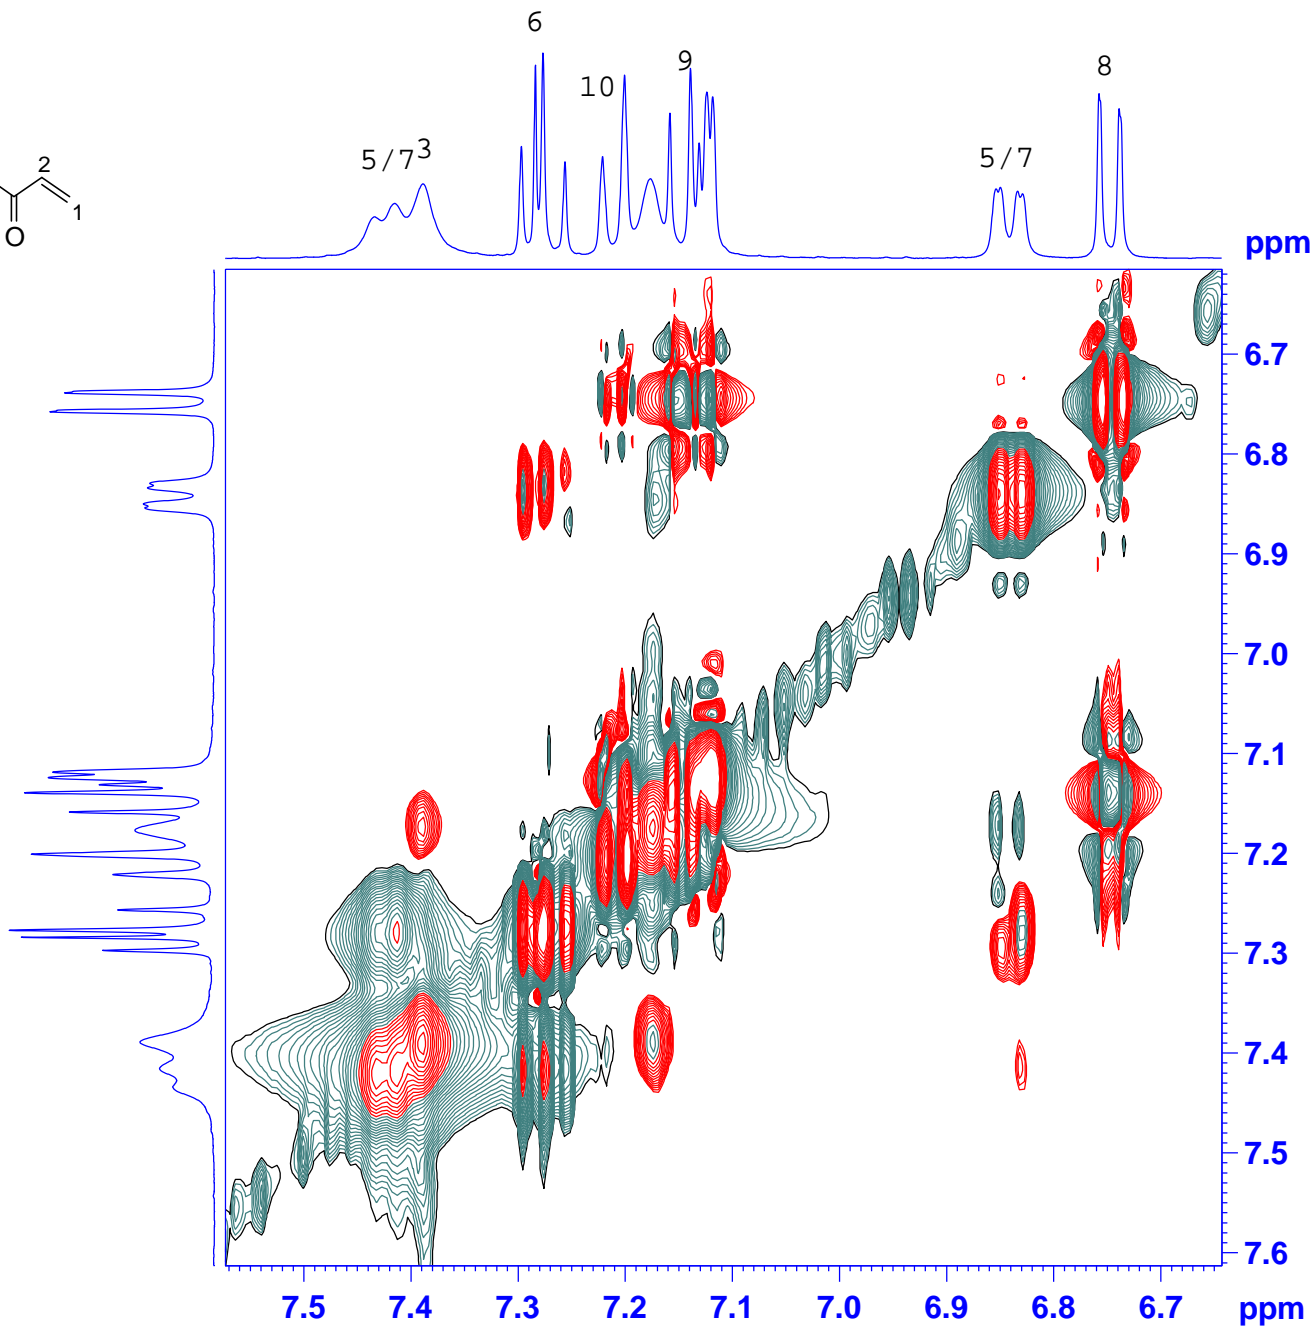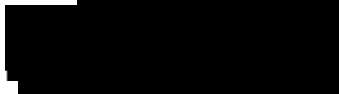

```

NAME      EW13998-13-P1B1
EXPNO     3
PROCNO    1
Date_     20180914
Time      2.18
INSTRUM   spect
PROBHD    5 mm PABBO BB/
PULPROG   noesygpqh
TD         2048
SOLVENT   CDC13
NS         8
DS         8
SWH       2000.000 Hz
FIDRES    0.976563 Hz
AQ         0.5120500 sec
RG         117.79
DW         250.000 usec
DE         6.50 usec
TE         298.2 K
D0         0.00023787 sec
D1         1.79999995 sec
D8         0.80000001 sec
D16        0.00020000 sec
IN0        0.00049980 sec

===== CHANNEL f1 =====
SFO1      400.1328009 MHz
NUC1      1H
P1         9.45 usec
P2         18.90 usec
ND0        1
TD         200
SFO1      400.1328 MHz
FIDRES    10.004002 Hz
SW         5,000 ppr
FnMODE    States-TPPI
SI         1024
SF         400.1300000 MHz
WDW        QSINE
SSB        2
LB         0.00 Hz
GB         0
PC         1.40
SI         1024
MC2       States-TPPI
SF         400.1300000 MHz
WDW        QSINE
SSB        2
LB         0.00 Hz
GB         0
    
```

# LCMS REPORT

Compound ID : GK-D3  
 Sample ID : EW13998-13-P1B2  
 Injection Vol : 10ul  
 Location : vial9  
 Acq Method : d:\method\5-95CD\_R\_220&254\_POS.lcm  
 Org DataFile : D:\DATA\1809\180911\EW13998-13-P1B2.lcd  
 Injection Date : 9/11/2018 5:12:14 PM  
 Instrument : LCMS-W 17-102

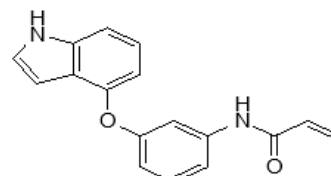

Exact Mass: 278.11

Chromatogram

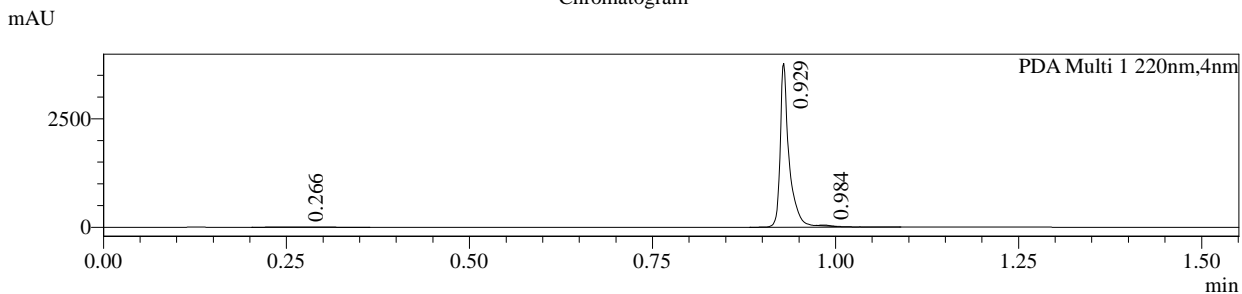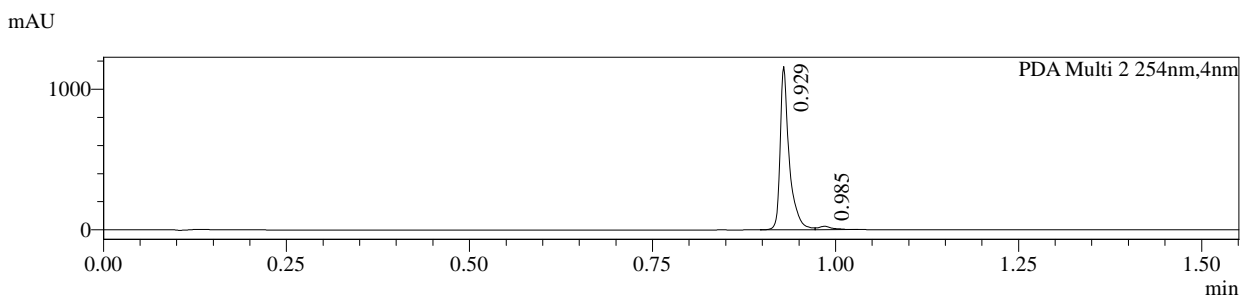

- 1 PDA Multi 1 / 220nm,4nm
- 2 PDA Multi 2 / 254nm,4nm

MS Chromatogram

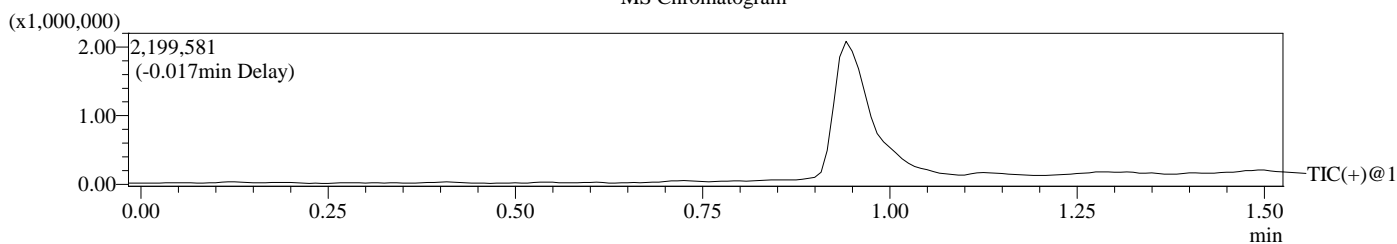

=====  
 Integration Result  
 =====

Peak Table

PDA Ch1 220nm

| Peak# | Ret. Time | Height  | Height% | USP Width | Area    | Area%  |
|-------|-----------|---------|---------|-----------|---------|--------|
| 1     | 0.266     | 6494    | 0.171   | 0.136     | 35274   | 1.069  |
| 2     | 0.929     | 3773628 | 99.362  | 0.021     | 3250436 | 98.539 |
| 3     | 0.984     | 17741   | 0.467   | 0.023     | 12934   | 0.392  |

Peak Table

PDA Ch2 254nm

| Peak# | Ret. Time | Height  | Height% | USP Width | Area   | Area%  |
|-------|-----------|---------|---------|-----------|--------|--------|
| 1     | 0.929     | 1160745 | 98.018  | 0.023     | 996298 | 97.072 |
| 2     | 0.985     | 23471   | 1.982   | 0.038     | 30055  | 2.928  |



Operator: \_\_\_\_\_

Date: \_\_\_\_\_

Mass Spectrum  
RefTime: 0.266 Datafile: D:\DATA\1809\180911\EW13998-13-P1B2.lcd

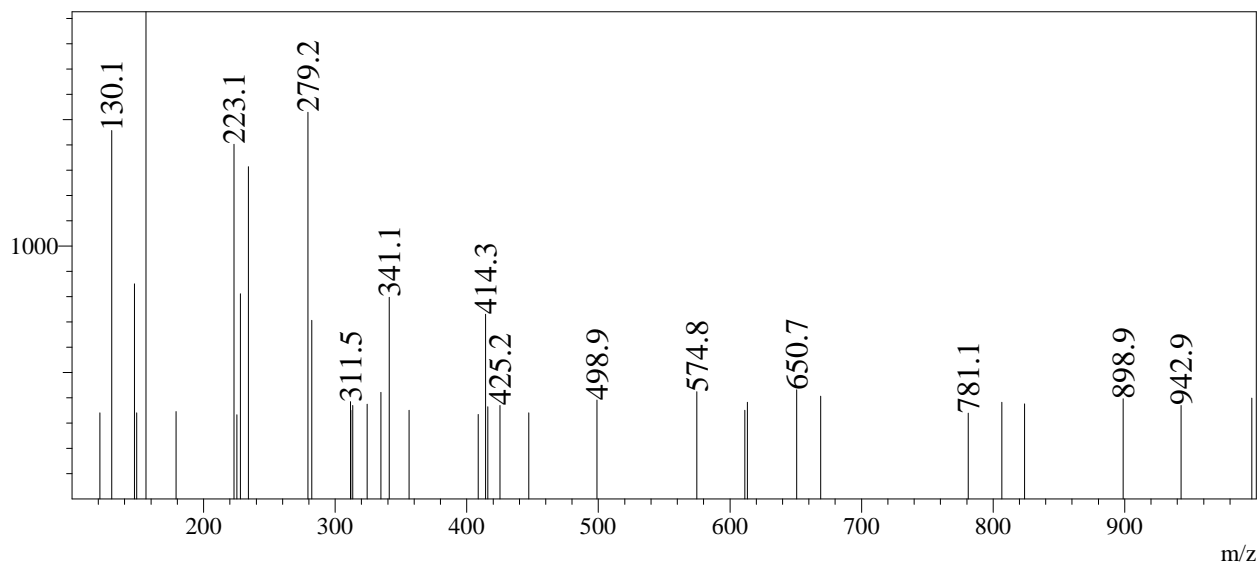

RefTime: 0.933 Datafile: D:\DATA\1809\180911\EW13998-13-P1B2.lcd

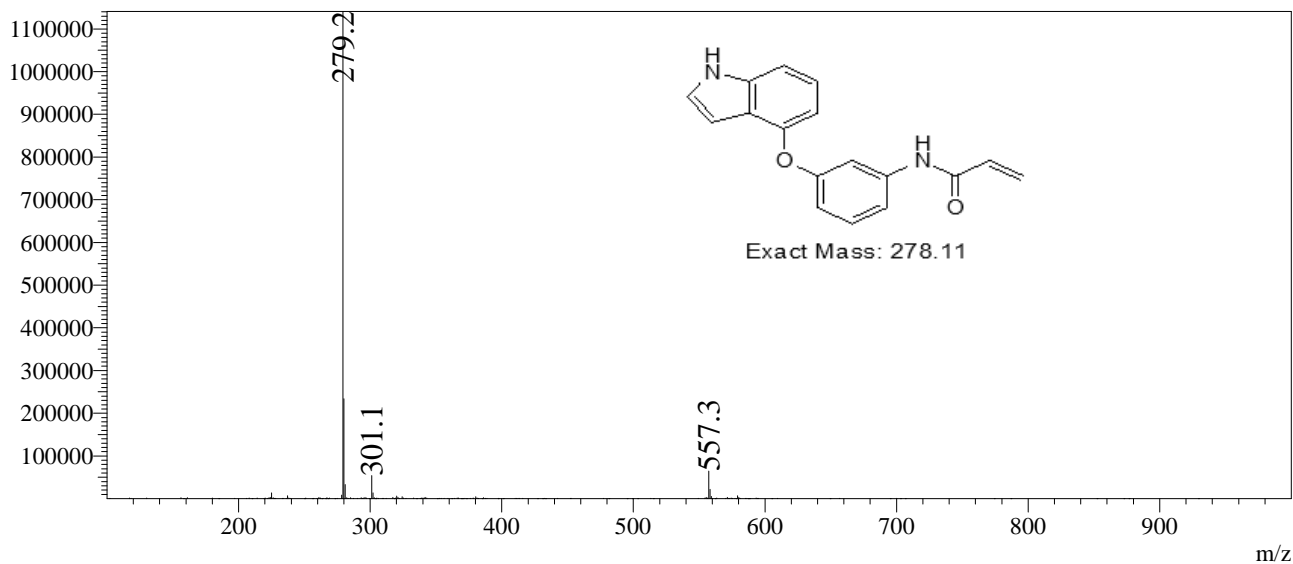

RefTime: 0.983 Datafile: D:\DATA\1809\180911\EW13998-13-P1B2.lcd

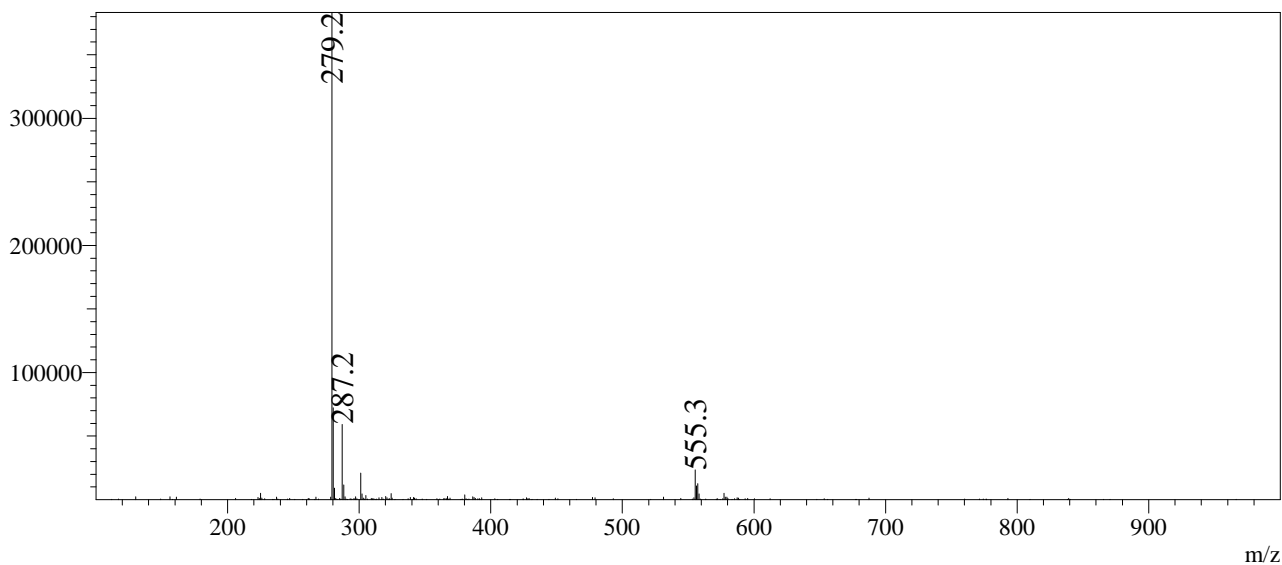

# HPLC REPORT

Compound ID : GK-D3  
 Sample ID : EW13998-13-P1B  
 Vial# : 44  
 Injection Volumn : 5  
 Filename : D:\DATA\2018\1809\180912\EW13998-13-P1B.lcd  
 Method Name : D:\METHOD\10-80CD\_4min.lcm  
 Instrument : HPLC-J  
 Run time : 9/12/2018 11:24:47

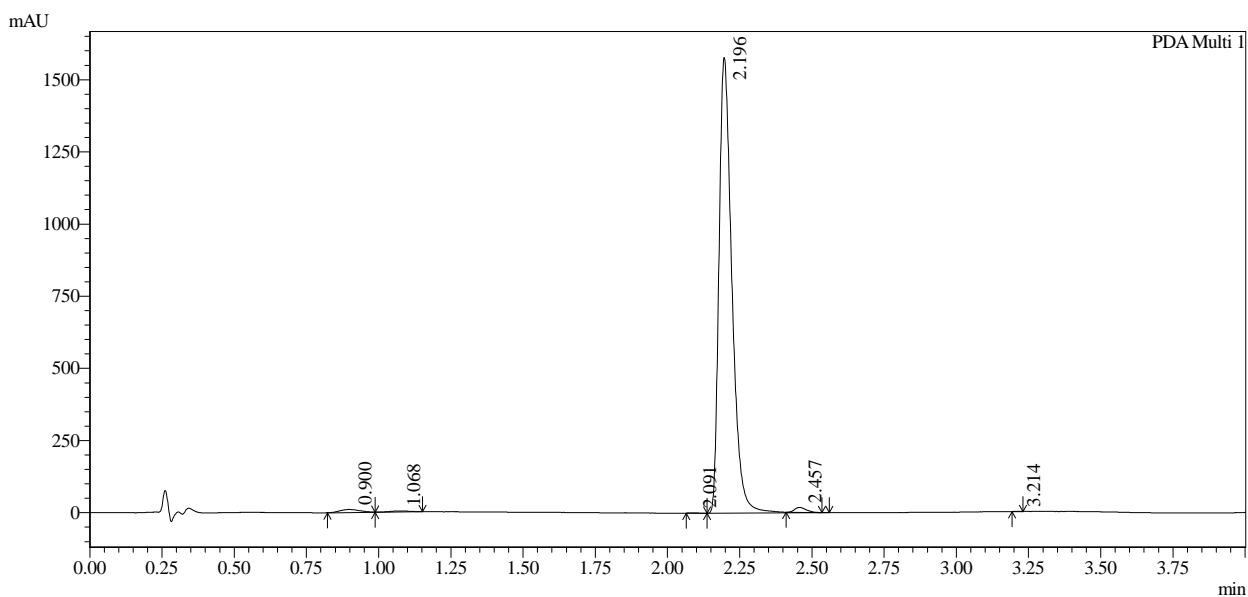

1 PDA Multi 1 / 220nm,4nm

-----  
 Integration result  
 -----

PeakTable

| Peak# | Ret. Time | USP Width | Resolution | Height  | Area    | Area %  |
|-------|-----------|-----------|------------|---------|---------|---------|
| 1     | 0.900     | 0.129     | 0.000      | 10579   | 52631   | 1.045   |
| 2     | 1.068     | 0.132     | 1.288      | 3750    | 19752   | 0.392   |
| 3     | 2.091     | 0.065     | 10.403     | 1238    | 2965    | 0.059   |
| 4     | 2.196     | 0.081     | 1.438      | 1578797 | 4909439 | 97.497  |
| 5     | 2.457     | 0.075     | 3.340      | 17373   | 49122   | 0.976   |
| 6     | 3.214     | 0.054     | 11.703     | 910     | 1580    | 0.031   |
| Total |           |           |            | 1612647 | 5035488 | 100.000 |

Operator : \_\_\_\_\_

Date : \_\_\_\_\_

# HPLC REPORT

Compound ID : GK-D3  
 Sample ID : EW13998-13-P1B  
 Filename : D:\DATA\2018\1809\180912\EW13998-13-P1B.lcd  
 Method Name : D:\METHOD\10-80CD\_4min.lcm  
 Instrument & Column : HPLC-J  
 Run time : 9/12/2018 11:24:47

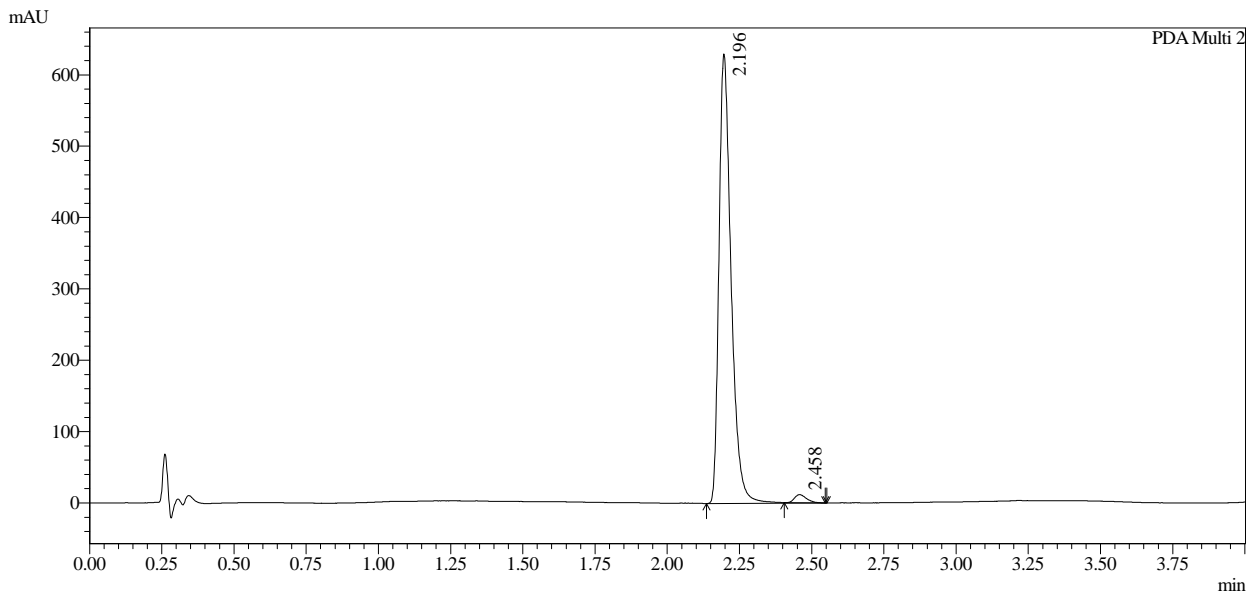

1 PDA Multi 2 / 254nm,4nm

-----  
 Integration result  
 -----

PeakTable

| PDA Ch2 254nm |           |           |            |        |         |         |
|---------------|-----------|-----------|------------|--------|---------|---------|
| Peak#         | Ret. Time | USP Width | Resolution | Height | Area    | Area %  |
| 1             | 2.196     | 0.075     | 0.000      | 630030 | 1841575 | 98.232  |
| 2             | 2.458     | 0.076     | 3.473      | 11460  | 33140   | 1.768   |
| Total         |           |           |            | 641491 | 1874715 | 100.000 |

Operator : \_\_\_\_\_

Date : \_\_\_\_\_

# HPLC REPORT

Compound ID : GK-D3  
 Sample ID : EW13998-13-P1B  
 Filename : D:\DATA\2018\1809\180912\EW13998-13-P1B.lcd  
 Method Name : D:\METHOD\10-80CD\_4min.lcm  
 Instrument & Column : HPLC-J  
 Run time : 9/12/2018 11:24:47

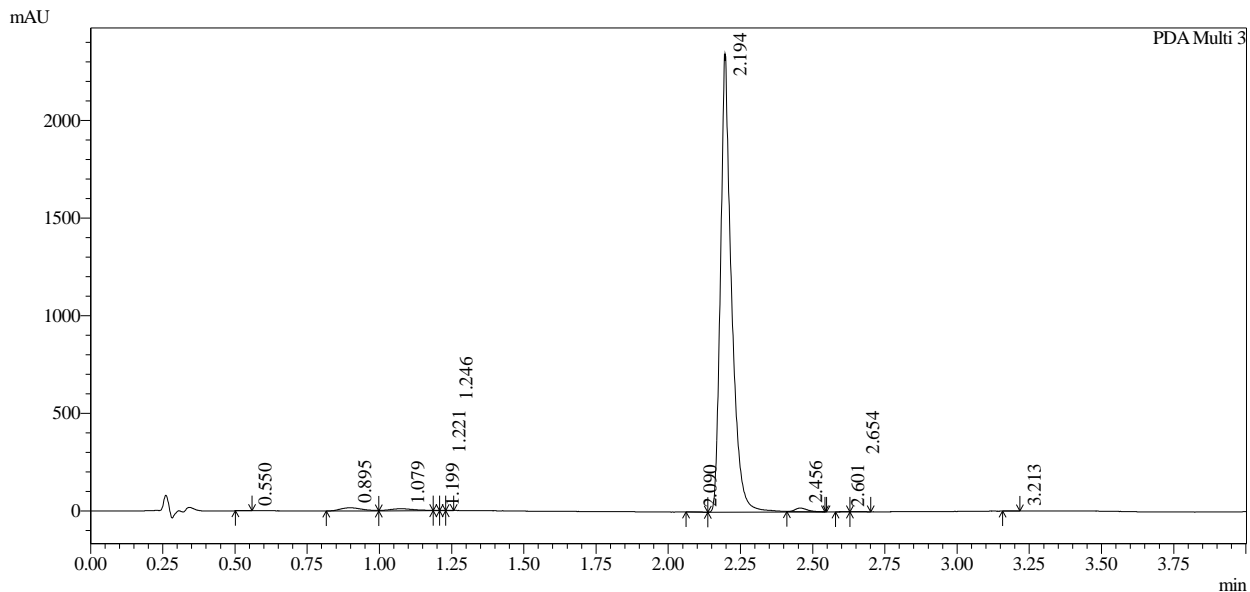

1 PDA Multi 3 / 215nm,4nm

## Integration result

PeakTable

PDA Ch3 215nm

| Peak# | Ret. Time | USP Width | Resolution | Height  | Area    | Area %  |
|-------|-----------|-----------|------------|---------|---------|---------|
| 1     | 0.550     | 0.051     | 0.000      | 374     | 1072    | 0.017   |
| 2     | 0.895     | 0.136     | 3.680      | 16239   | 85439   | 1.328   |
| 3     | 1.079     | 0.159     | 1.247      | 10201   | 63483   | 0.986   |
| 4     | 1.199     | 0.085     | 0.986      | 1627    | 1935    | 0.030   |
| 5     | 1.221     | 0.160     | 0.185      | 1085    | 1329    | 0.021   |
| 6     | 1.246     | 0.100     | 0.193      | 814     | 1222    | 0.019   |
| 7     | 2.090     | 0.063     | 10.340     | 1204    | 2596    | 0.040   |
| 8     | 2.194     | 0.069     | 1.577      | 2346838 | 6222010 | 96.677  |
| 9     | 2.456     | 0.075     | 3.645      | 17936   | 50353   | 0.782   |
| 10    | 2.601     | 0.272     | 0.836      | 556     | 1458    | 0.023   |
| 11    | 2.654     | 0.092     | 0.289      | 1357    | 3231    | 0.050   |
| 12    | 3.213     | 0.073     | 6.778      | 895     | 1719    | 0.027   |
| Total |           |           |            | 2399127 | 6435848 | 100.000 |

Operator : \_\_\_\_\_

Date : \_\_\_\_\_

Compound ID: GK-D4

EW13860-31-P1A DMSO Bruker\_D\_400MHz

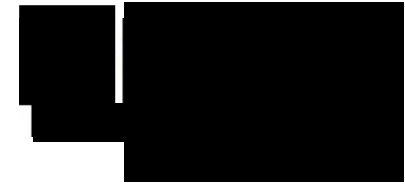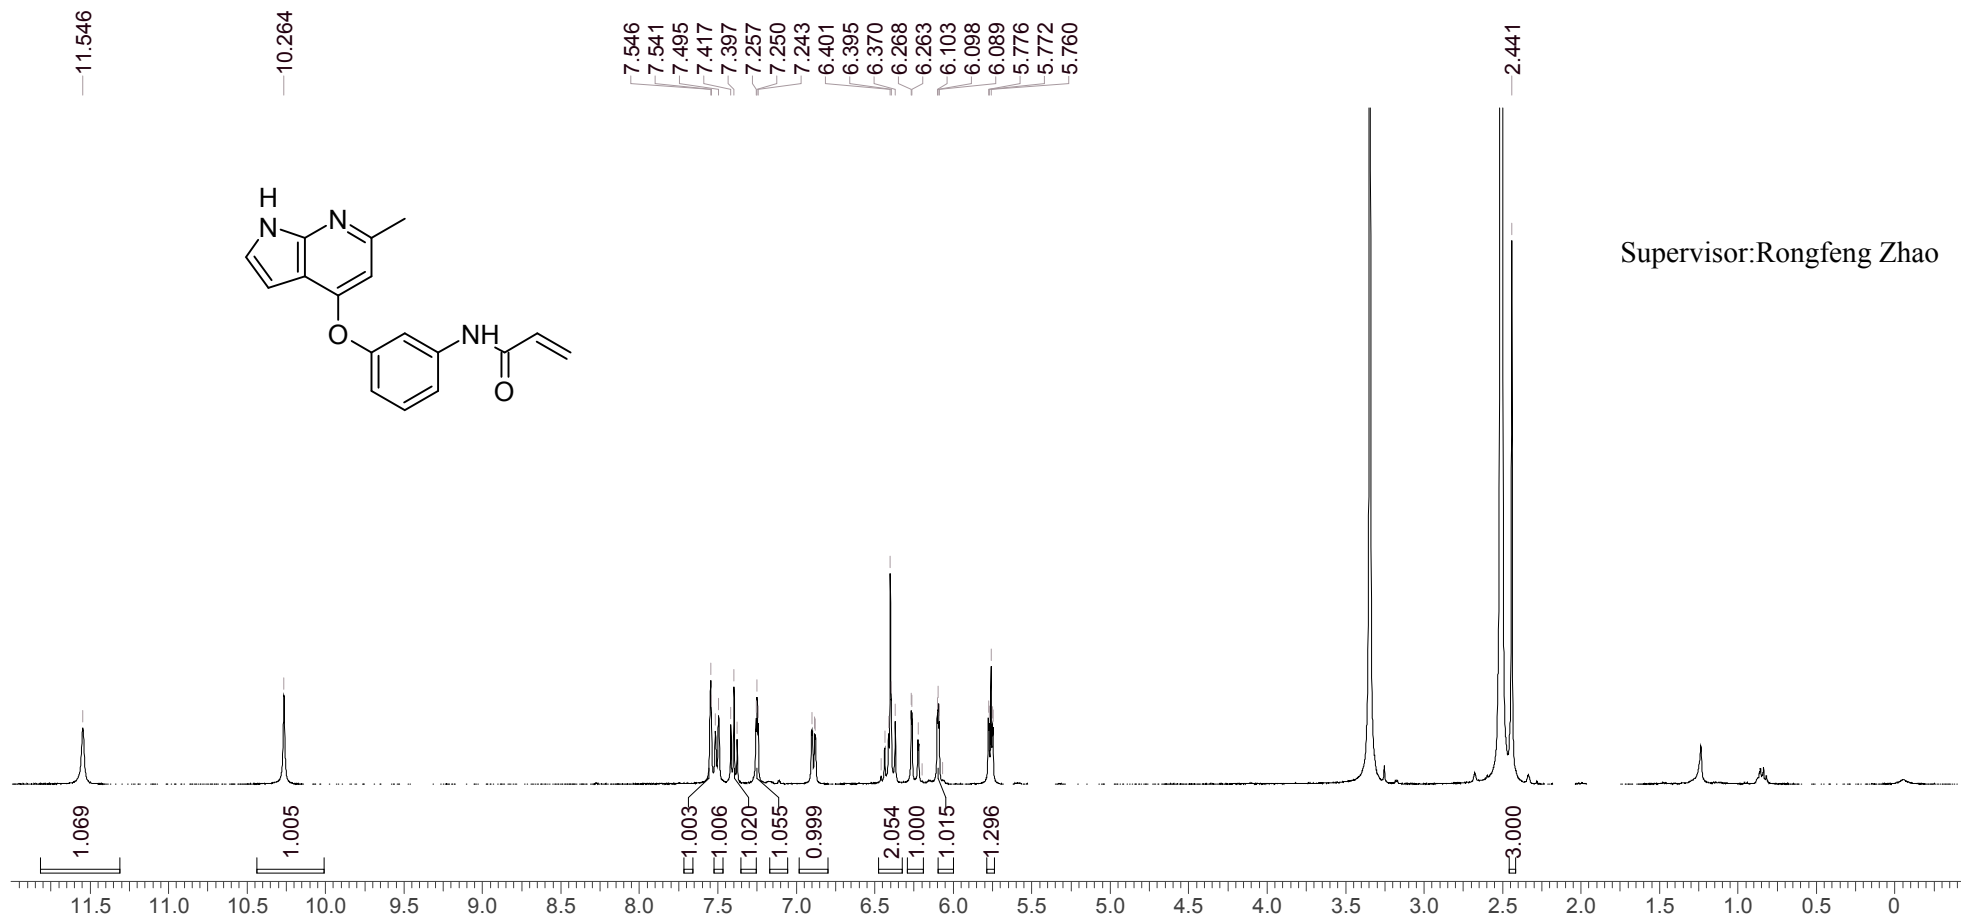

Supervisor: Rongfeng Zhao

Operator:

Date:

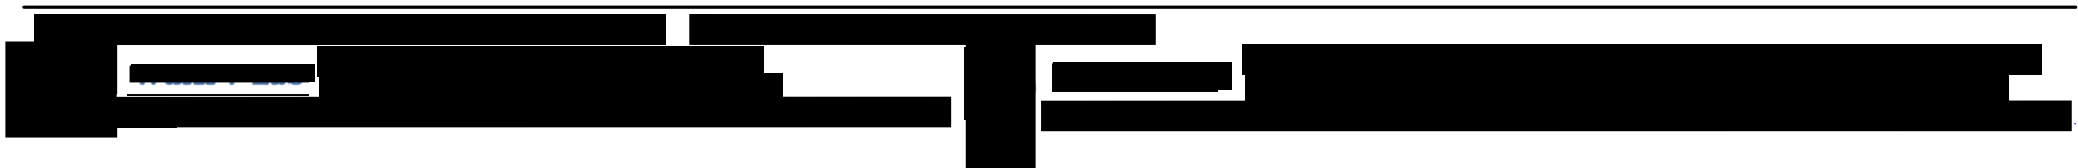

# LCMS REPORT

---

Compound ID : GK-D4  
 Sample ID : EW13860-31-P1B  
 Injection Vol : 2ul  
 Location : vial56  
 Acq Method : d:\method\5-95CD\_R\_220&254\_POS.lcm  
 Org DataFile : D:\DATA\1808\180831\EW13860-31-P1B.lcd  
 Injection Date : 8/31/2018 3:17:45 PM  
 Instrument : LCMS-W 17-102

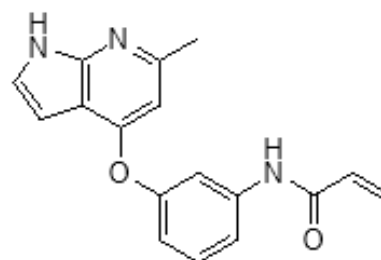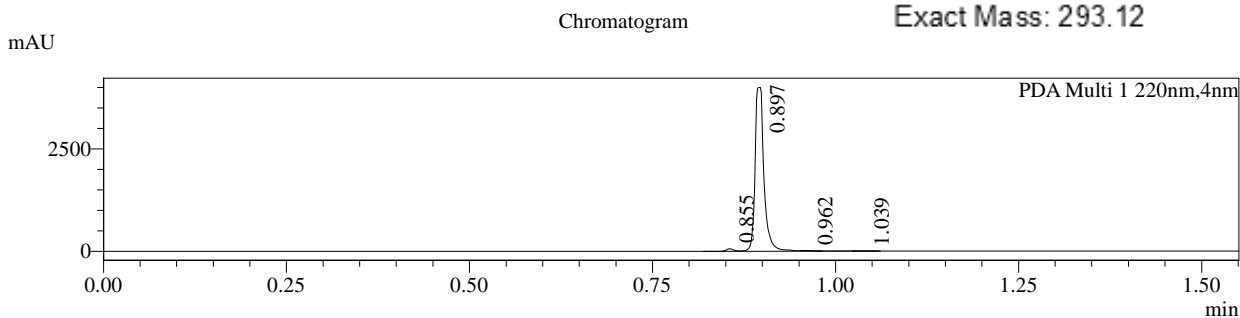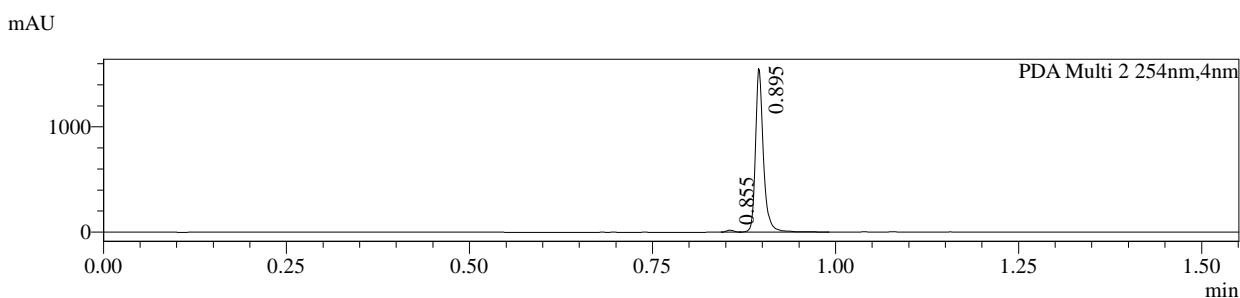

- 1 PDA Multi 1 / 220nm,4nm
- 2 PDA Multi 2 / 254nm,4nm

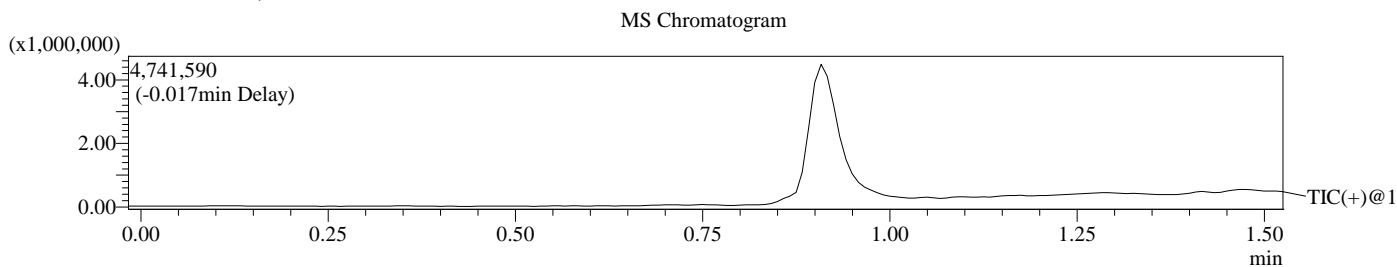


---

### Integration Result

---

#### Peak Table

PDA Ch1 220nm

| Peak# | Ret. Time | Height  | Height% | USP Width | Area    | Area%  |
|-------|-----------|---------|---------|-----------|---------|--------|
| 1     | 0.855     | 58693   | 1.441   | 0.021     | 42541   | 1.214  |
| 2     | 0.897     | 4000534 | 98.239  | 0.021     | 3451856 | 98.494 |
| 3     | 0.962     | 6744    | 0.166   | 0.023     | 5078    | 0.145  |
| 4     | 1.039     | 6273    | 0.154   | 0.024     | 5154    | 0.147  |

#### Peak Table

PDA Ch2 254nm

| Peak# | Ret. Time | Height  | Height% | USP Width | Area    | Area%  |
|-------|-----------|---------|---------|-----------|---------|--------|
| 1     | 0.855     | 19890   | 1.263   | 0.020     | 13855   | 1.155  |
| 2     | 0.895     | 1555179 | 98.737  | 0.021     | 1185208 | 98.845 |

Operator: \_\_\_\_\_

Date: \_\_\_\_\_



Mass Spectrum

RefTime: 0.858 Datafile: D:\DATA\1808\180831\EW13860-31-P1B.lcd

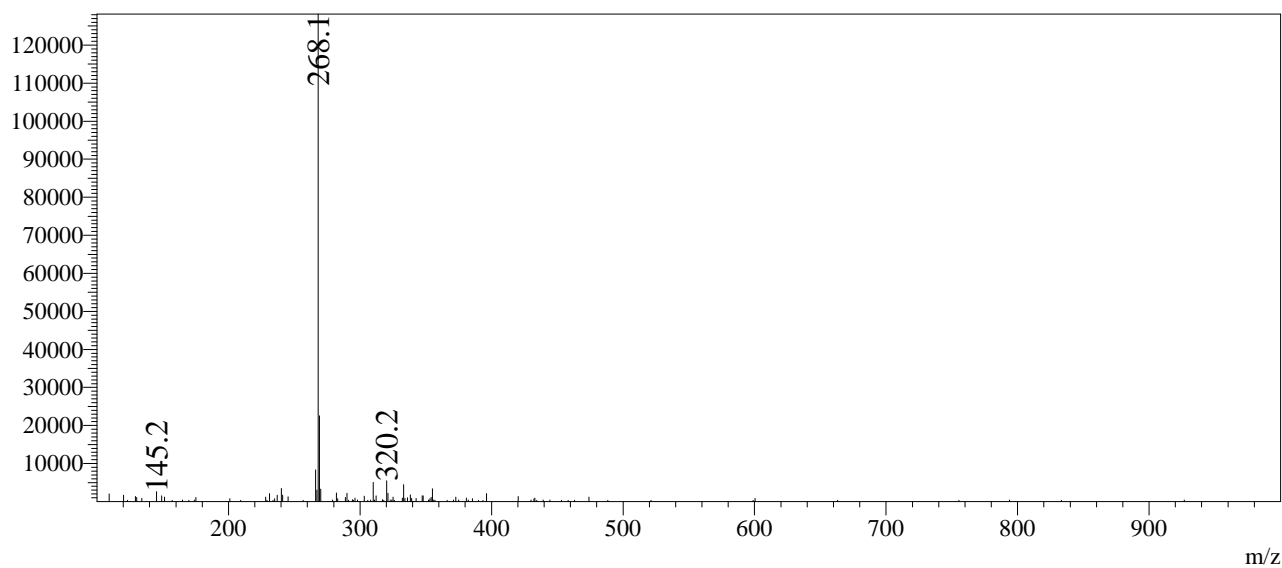

RefTime: 0.900 Datafile: D:\DATA\1808\180831\EW13860-31-P1B.lcd

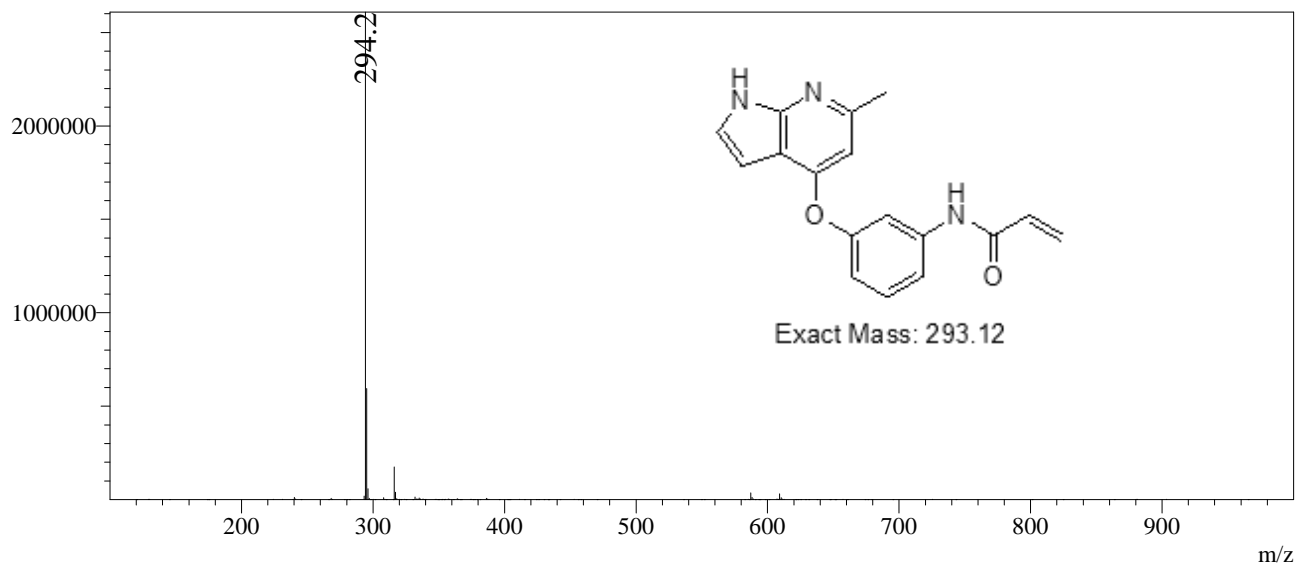

RefTime: 0.966 Datafile: D:\DATA\1808\180831\EW13860-31-P1B.lcd

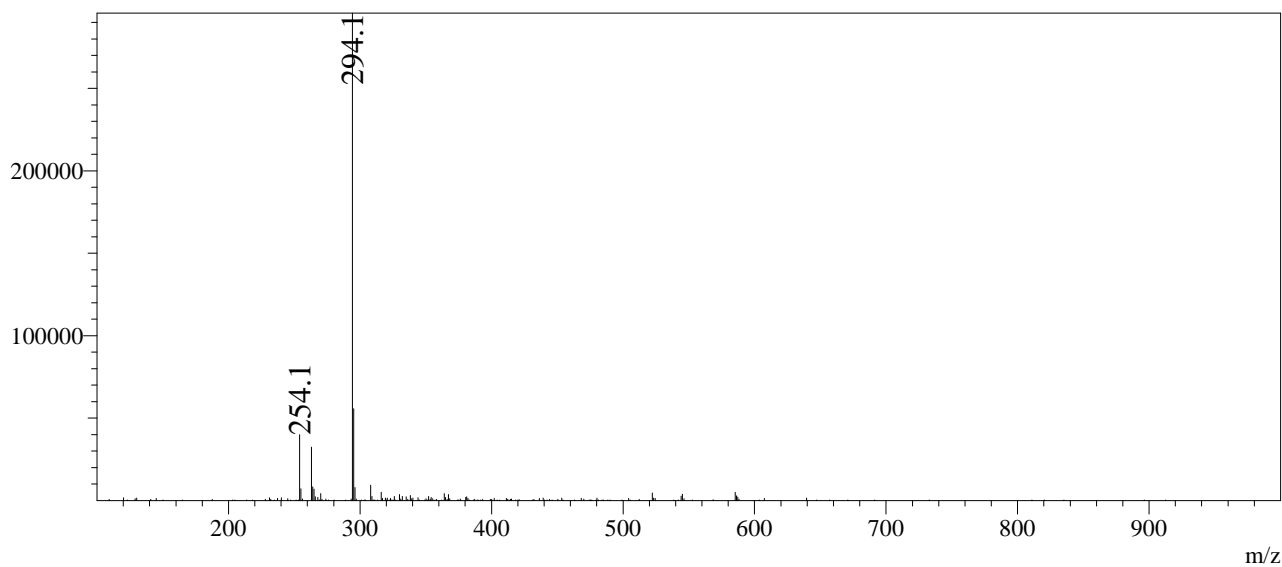

RetTime: 1.041 Datafile: D:\DATA\1808\180831\EW13860-31-P1B.lcd

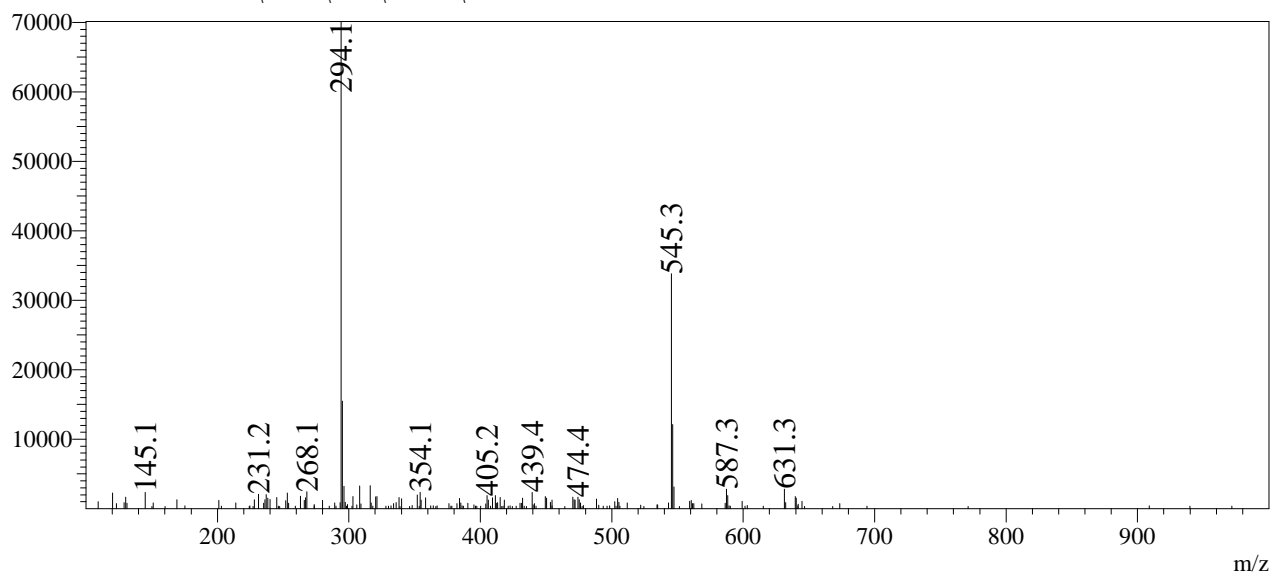

# HPLC REPORT

Compound ID : GK-D4  
 Sample ID : EW13860-31-P1B  
 Vial# : 60  
 Injection Volumn : 1  
 Filename : D:\DATA\2018\1809\180904\EW13860-31-P1B.lcd  
 Method Name : D:\Method\10-80CD\_4min.lcm  
 Instrument : HPLC-J  
 Run time : 9/4/2018 11:15:53

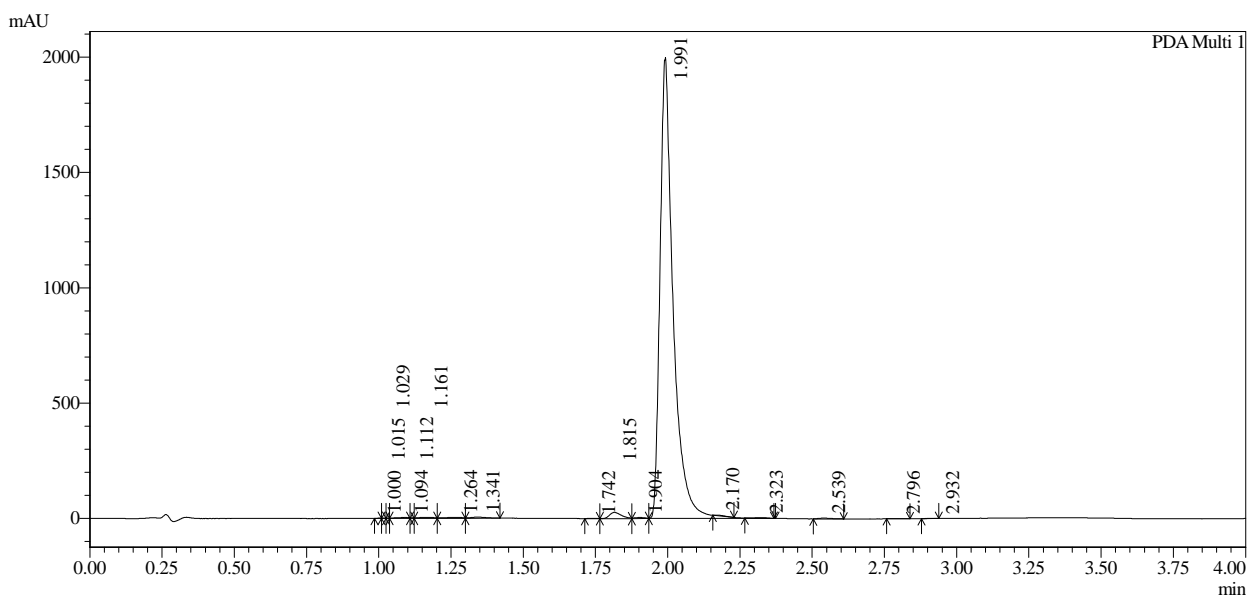

1 PDA Multi 1 / 220nm,4nm

## Integration result

PeakTable

| Peak# | Ret. Time | USP Width | Resolution | Height  | Area    | Area %  |
|-------|-----------|-----------|------------|---------|---------|---------|
| 1     | 1.000     | 0.000     | 0.000      | 882     | 1038    | 0.016   |
| 2     | 1.015     | 0.046     | 0.000      | 1132    | 1042    | 0.016   |
| 3     | 1.029     | 0.105     | 0.195      | 1402    | 1002    | 0.015   |
| 4     | 1.094     | 0.238     | 0.374      | 3368    | 11549   | 0.177   |
| 5     | 1.112     | 1.158     | 0.026      | 3009    | 2511    | 0.039   |
| 6     | 1.161     | 0.329     | 0.066      | 4308    | 16408   | 0.252   |
| 7     | 1.264     | 0.191     | 0.396      | 3941    | 17767   | 0.273   |
| 8     | 1.341     | 0.099     | 0.532      | 4918    | 18467   | 0.284   |
| 9     | 1.742     | 0.050     | 5.352      | 690     | 1302    | 0.020   |
| 10    | 1.815     | 0.075     | 1.166      | 26785   | 75588   | 1.161   |
| 11    | 1.904     | 0.091     | 1.067      | 4586    | 11550   | 0.177   |
| 12    | 1.991     | 0.081     | 1.019      | 1999156 | 6322383 | 97.140  |
| 13    | 2.170     | 0.061     | 2.512      | 2154    | 6264    | 0.096   |
| 14    | 2.323     | 0.070     | 2.331      | 2742    | 7068    | 0.109   |
| 15    | 2.539     | 0.086     | 2.778      | 3273    | 10222   | 0.157   |
| 16    | 2.796     | 0.088     | 2.960      | 1040    | 3145    | 0.048   |
| 17    | 2.932     | 0.058     | 1.875      | 335     | 1204    | 0.019   |
| Total |           |           |            | 2063721 | 6508509 | 100.000 |

Operator : \_\_\_\_\_

Date : \_\_\_\_\_

# HPLC REPORT

Compound ID : GK-D4  
 Sample ID : EW13860-31-P1B  
 Filename : D:\DATA\2018\1809\180904\EW13860-31-P1B.lcd  
 Method Name : D:\Method\10-80CD\_4min.lcm  
 Instrument & Column : HPLC-J  
 Run time : 9/4/2018 11:15:53

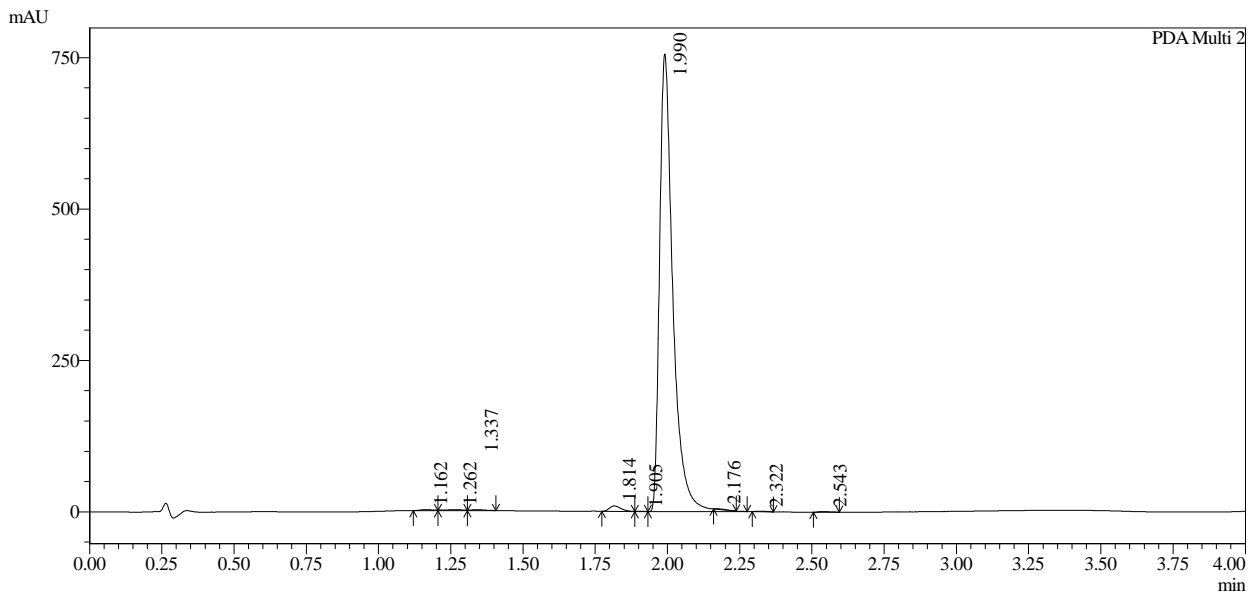

1 PDA Multi 2 / 254nm,4nm

-----  
 Integration result  
 -----

PeakTable

PDA Ch2 254nm

| Peak# | Ret. Time | USP Width | Resolution | Height | Area    | Area %  |
|-------|-----------|-----------|------------|--------|---------|---------|
| 1     | 1.162     | 0.102     | 0.000      | 1539   | 4894    | 0.198   |
| 2     | 1.262     | 0.114     | 0.931      | 1683   | 6803    | 0.275   |
| 3     | 1.337     | 0.093     | 0.721      | 1617   | 5131    | 0.207   |
| 4     | 1.814     | 0.074     | 5.732      | 8948   | 25072   | 1.013   |
| 5     | 1.905     | 0.058     | 1.376      | 685    | 1278    | 0.052   |
| 6     | 1.990     | 0.080     | 1.230      | 755714 | 2424499 | 97.977  |
| 7     | 2.176     | 0.058     | 2.694      | 875    | 2115    | 0.085   |
| 8     | 2.322     | 0.065     | 2.386      | 841    | 1908    | 0.077   |
| 9     | 2.543     | 0.081     | 3.015      | 1043   | 2846    | 0.115   |
| Total |           |           |            | 772945 | 2474548 | 100.000 |

Operator : \_\_\_\_\_

Date : \_\_\_\_\_

# HPLC REPORT

Compound ID : GK-D4  
 Sample ID : EW13860-31-P1B  
 Filename : D:\DATA\2018\1809\180904\EW13860-31-P1B.lcd  
 Method Name : D:\Method\10-80CD\_4min.lcm  
 Instrument & Column : HPLC-J  
 Run time : 9/4/2018 11:15:53

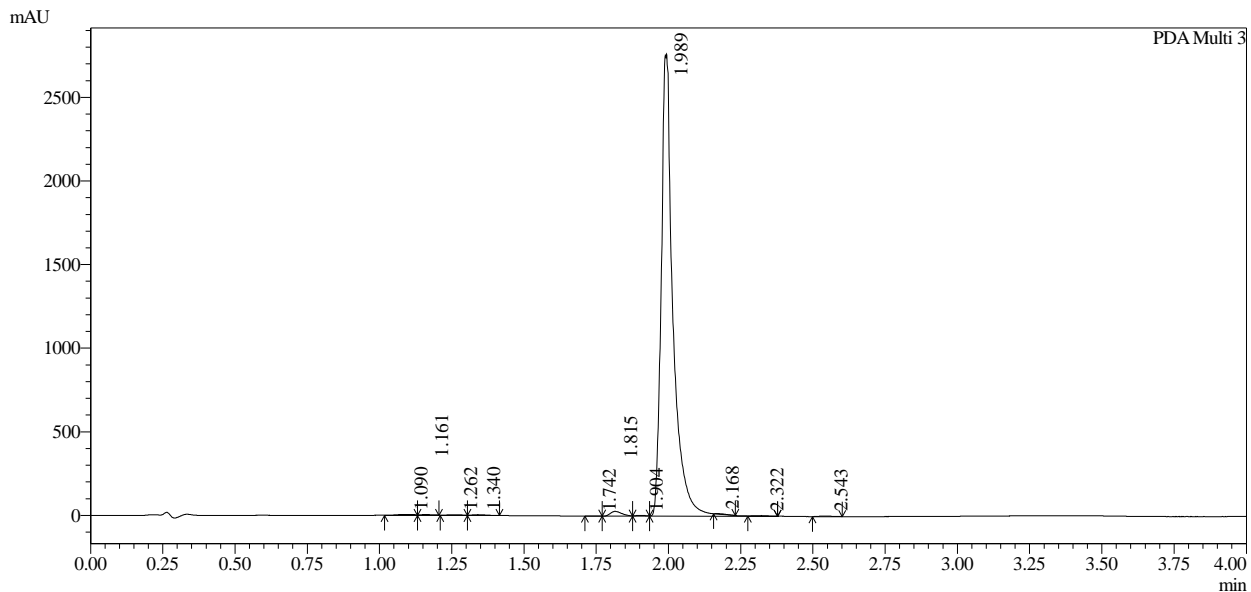

1 PDA Multi 3 / 215nm,4nm

## Integration result

### PeakTable

PDA Ch3 215nm

| Peak# | Ret. Time | USP Width | Resolution | Height  | Area    | Area %  |
|-------|-----------|-----------|------------|---------|---------|---------|
| 1     | 1.090     | 0.177     | 0.000      | 6264    | 29318   | 0.364   |
| 2     | 1.161     | 0.197     | 0.380      | 5170    | 18836   | 0.234   |
| 3     | 1.262     | 0.275     | 0.426      | 4134    | 17776   | 0.220   |
| 4     | 1.340     | 0.090     | 0.432      | 4982    | 16549   | 0.205   |
| 5     | 1.742     | 0.053     | 5.606      | 944     | 1817    | 0.023   |
| 6     | 1.815     | 0.076     | 1.133      | 28531   | 80828   | 1.003   |
| 7     | 1.904     | 0.081     | 1.135      | 4815    | 12228   | 0.152   |
| 8     | 1.989     | 0.059     | 1.222      | 2753307 | 7859495 | 97.493  |
| 9     | 2.168     | 0.064     | 2.910      | 2052    | 6811    | 0.084   |
| 10    | 2.322     | 0.067     | 2.354      | 2924    | 7318    | 0.091   |
| 11    | 2.543     | 0.087     | 2.875      | 3551    | 10609   | 0.132   |
| Total |           |           |            | 2816674 | 8061586 | 100.000 |

Operator : \_\_\_\_\_

Date : \_\_\_\_\_

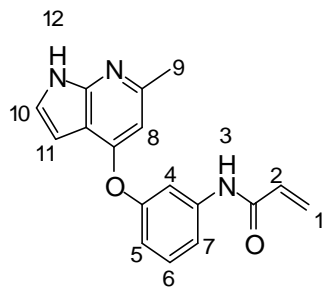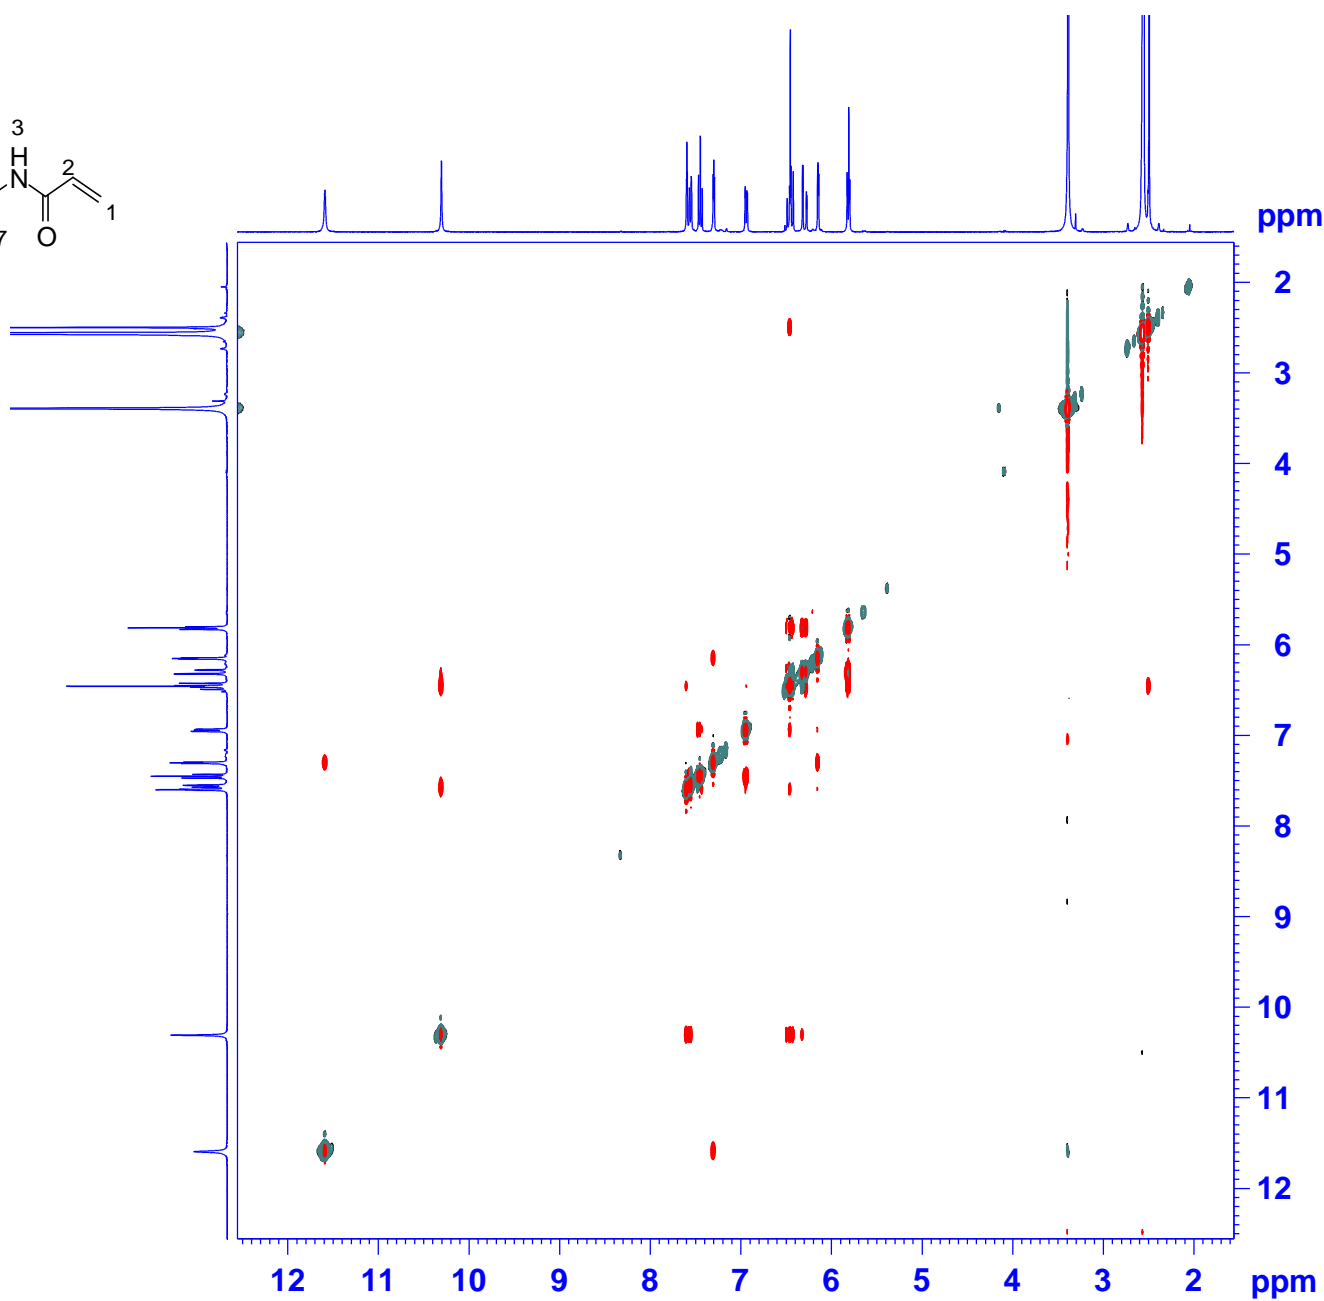

```

NAME      EW13860-31-P1B
EXPNO    2
PROCNO    1
Date_     20180903
Time      21.14 h
INSTRUM   spect
PROBHD    z116098_0689 (
PULPROG   noesygpph
TD         2048
SOLVENT   DMSO
NS         8
DS         8
SWH        4401.409 Hz
FIDRES     4.298251 Hz
AQ         0.2327028 sec
RG         112.48
DW         113.600 usec
DE         6.50 usec
TE         300.1 K
D0         0.00010087 sec
D1         2.00000000 sec
D8         0.80000001 sec
D16        0.00020000 sec
IN0        0.00022720 sec
ND0        1
TD         200
SFO1       400.1728 MH:
FIDRES     22.007042 Hz
SW         10.999 ppr
FnMODE     TPPI
SI         1024
SF         400.1699771 MH:
WDW         QSINE
SSB         2
LB         0.00 Hz
GB         0
PC         1.00
SI         1024
MC2        TPPI
SF         400.1699772 MH:
WDW         QSINE
SSB         2
LB         0.00 Hz
GB         0
    
```

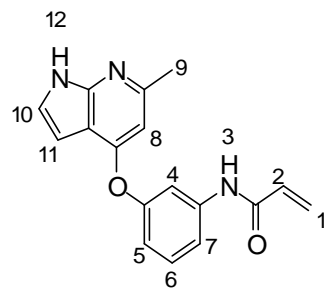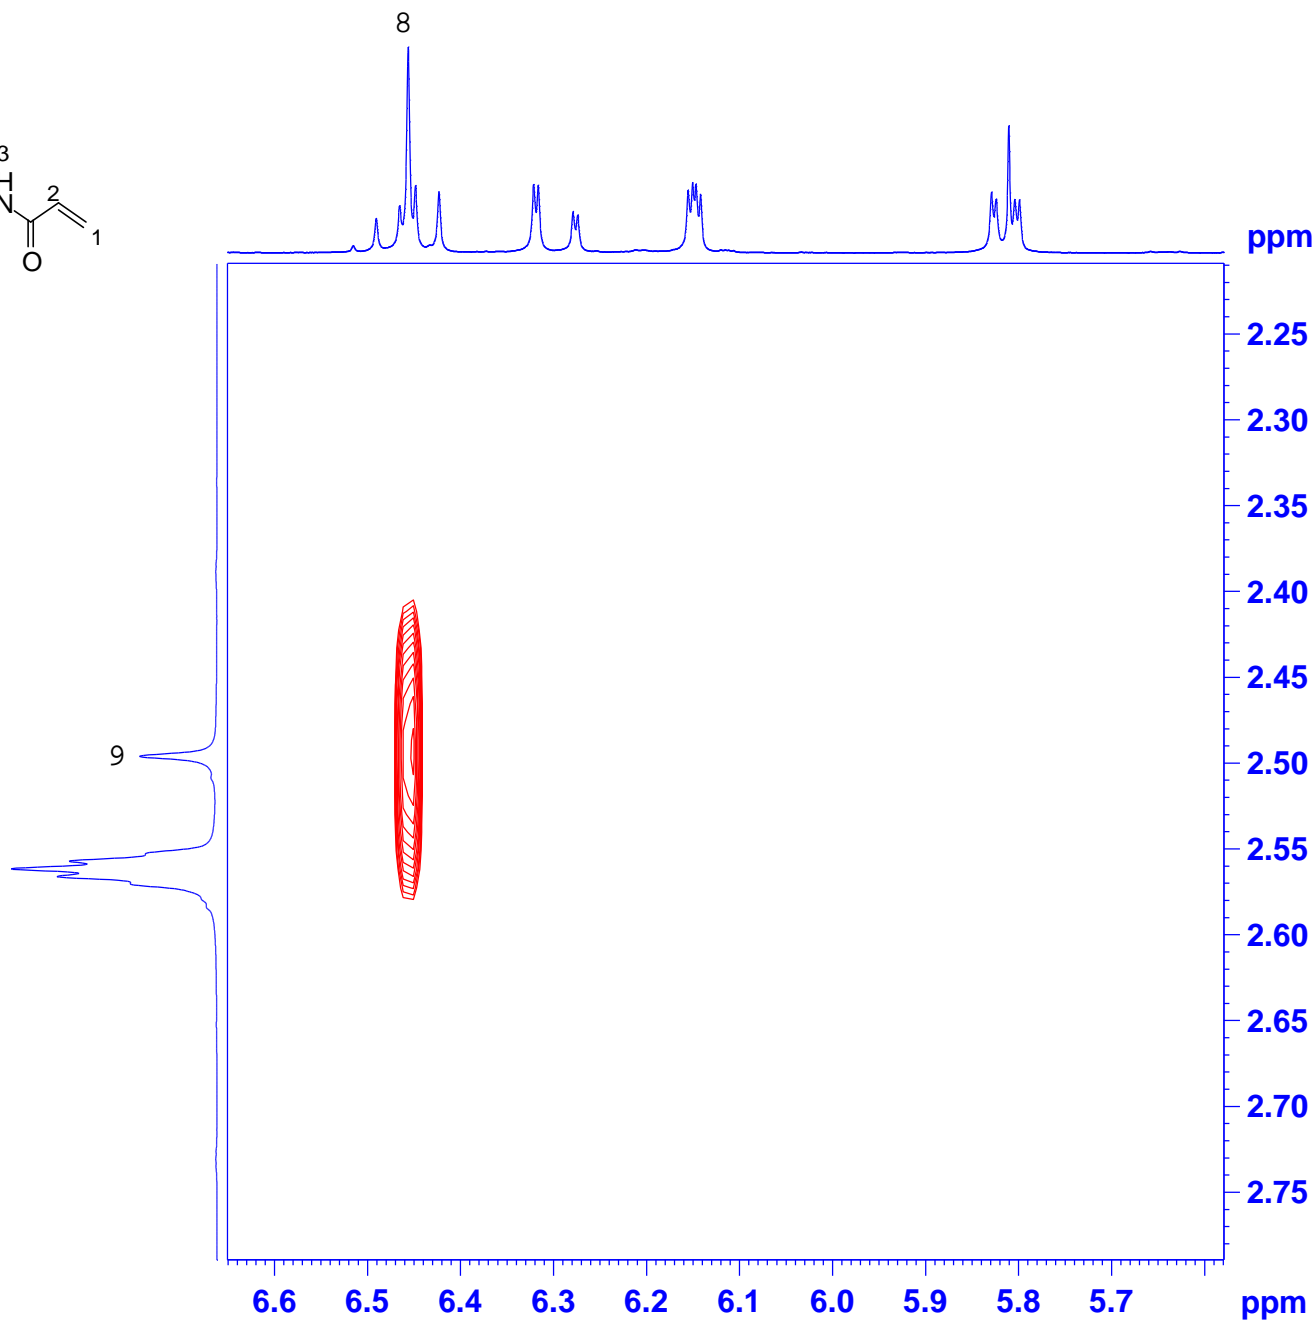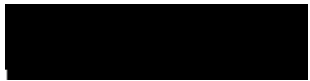

|         |                 |
|---------|-----------------|
| NAME    | EW13860-31-P1B  |
| EXPNO   | 2               |
| PROCNO  | 1               |
| Date_   | 20180903        |
| Time    | 21.14 h         |
| INSTRUM | spect           |
| PROBHD  | Z116098_0689 (  |
| PULPROG | noesygpqh       |
| TD      | 2048            |
| SOLVENT | DMSO            |
| NS      | 8               |
| DS      | 8               |
| SWH     | 4401.409 Hz     |
| FIDRES  | 4.298251 Hz     |
| AQ      | 0.2327028 sec   |
| RG      | 112.48          |
| DW      | 113.600 usec    |
| DE      | 6.50 usec       |
| TE      | 300.1 K         |
| D0      | 0.00010087 sec  |
| D1      | 2.00000000 sec  |
| D8      | 0.80000001 sec  |
| D16     | 0.00020000 sec  |
| IN0     | 0.00022720 sec  |
| ND0     | 1               |
| TD      | 200             |
| SFO1    | 400.1728 MH:    |
| FIDRES  | 22.007042 Hz    |
| SW      | 10.999 ppr      |
| FnMODE  | TPPI            |
| SI      | 1024            |
| SF      | 400.1699771 MH: |
| WDW     | QSINE           |
| SSB     | 2               |
| LB      | 0.00 Hz         |
| GB      | 0               |
| PC      | 1.00            |
| SI      | 1024            |
| MC2     | TPPI            |
| SF      | 400.1699772 MH: |
| WDW     | QSINE           |
| SSB     | 2               |
| LB      | 0.00 Hz         |
| GB      | 0               |



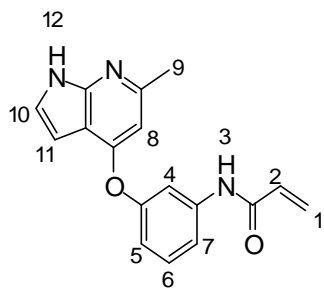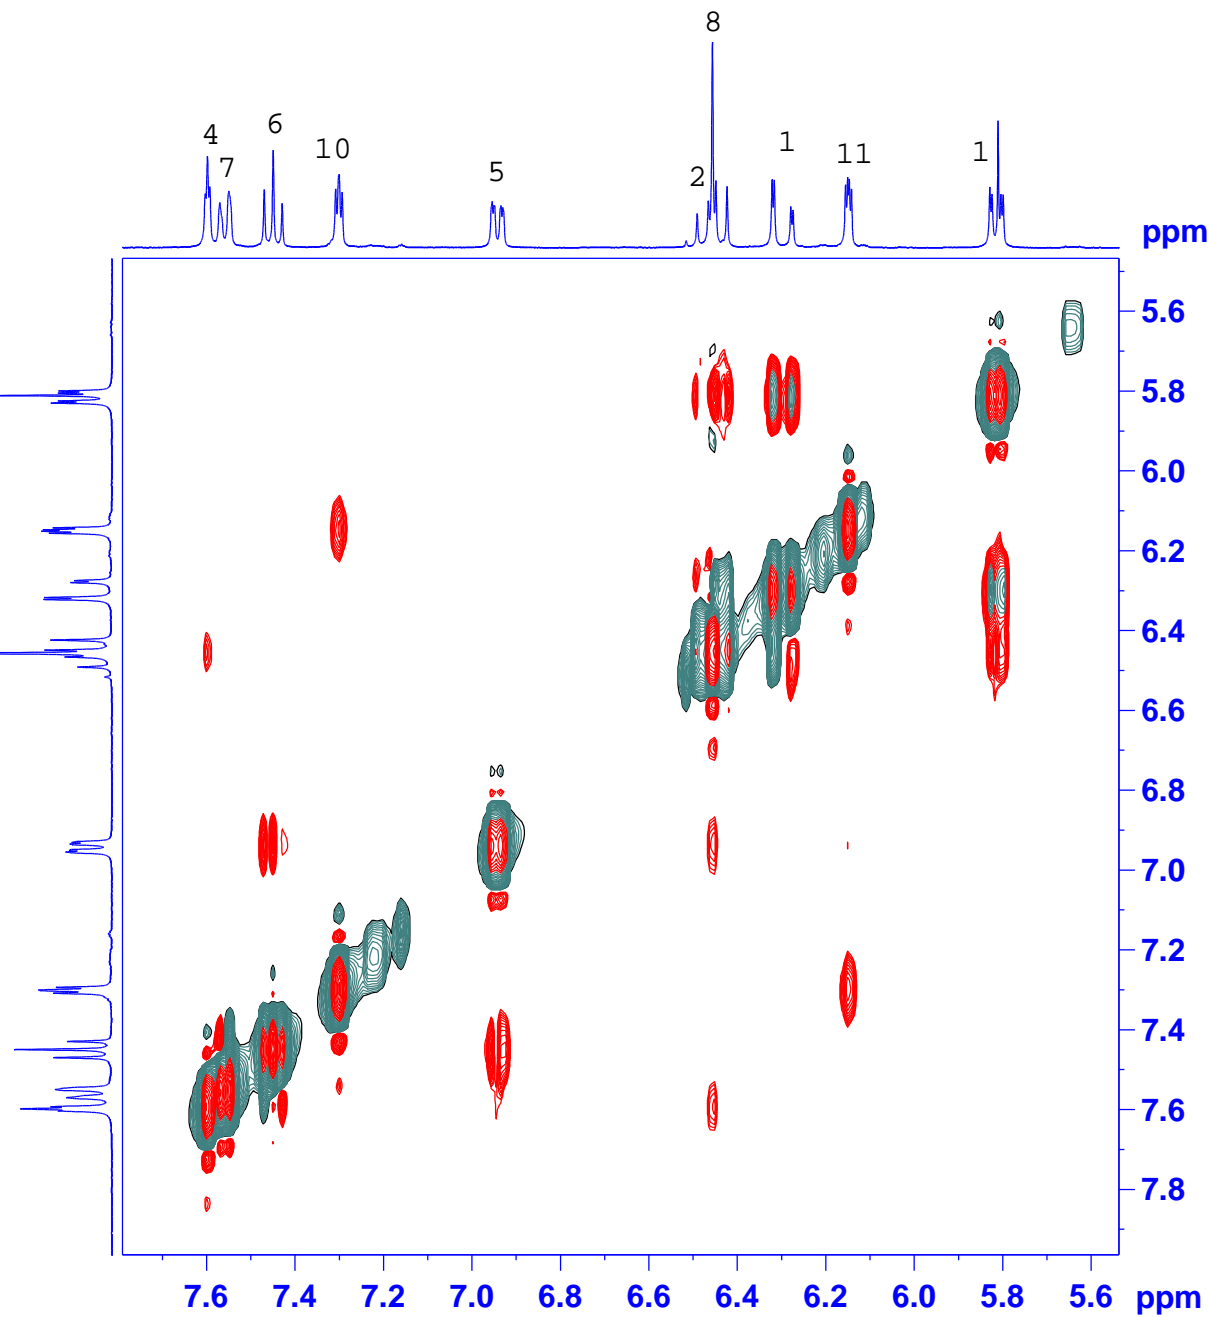

```

NAME      EW13860-31-P1B
EXPNO     2
PROCNO    1
Date_     20180903
Time      21.14 h
INSTRUM   spect
PROBHD    z116098_0689 (
PULPROG   noesygpph
TD         2048
SOLVENT   DMSO
NS         8
DS         8
SWH       4401.409 Hz
FIDRES    4.298251 Hz
AQ         0.2327028 sec
RG         112.48
DW         113.600 usec
DE         6.50 usec
TE         300.1 K
D0         0.00010087 sec
D1         2.00000000 sec
D8         0.80000001 sec
D16        0.00020000 sec
IN0        0.00022720 sec
ND0        1
TD         200
SFO1      400.1728 MHz
FIDRES    22.007042 Hz
SW         10.999 ppr
FnMODE    TPPI
SI         1024
SF         400.1699771 MHz
WDW        QSINE
SSB        2
LB         0.00 Hz
GB         0
PC         1.00
SI         1024
MC2        TPPI
SF         400.1699772 MHz
WDW        QSINE
SSB        2
LB         0.00 Hz
GB         0
    
```

EW13860-31-P1B DMSO NOE

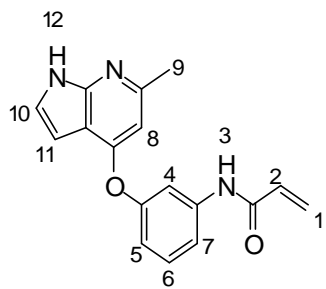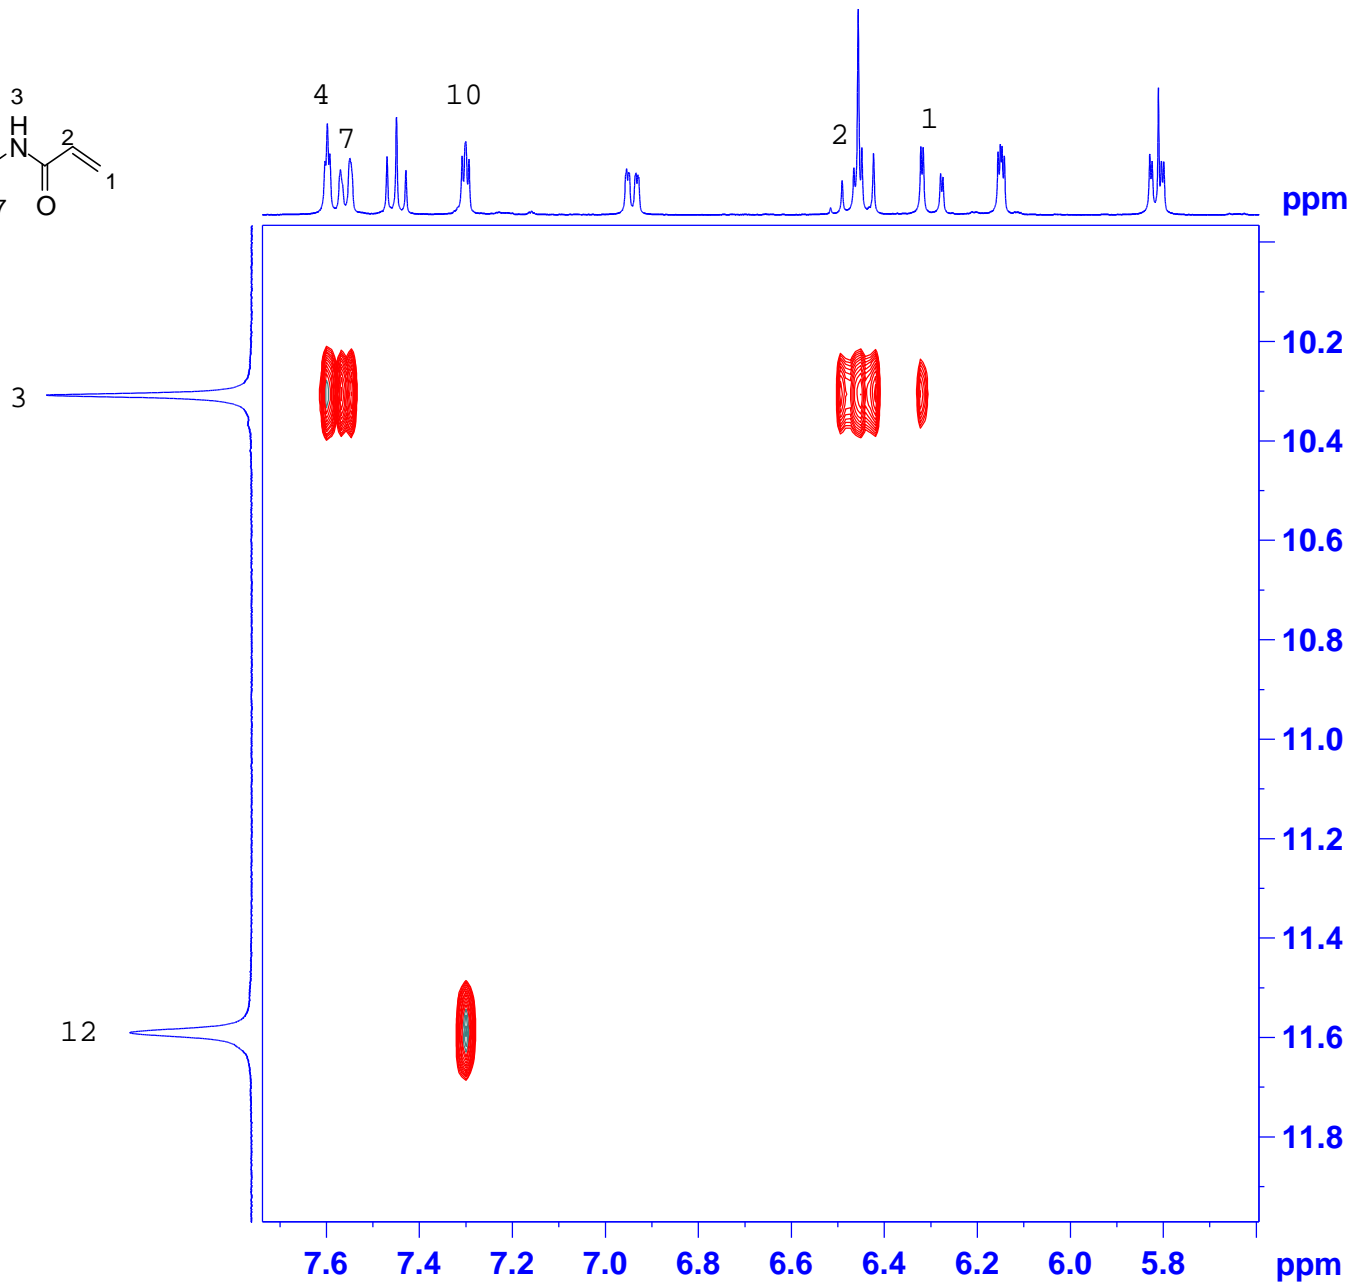

```

NAME      EW13860-31-P1B
EXPNO     2
PROCNO    1
Date_     20180903
Time      21.14 h
INSTRUM   spect
PROBHD    z116098_0689 (
PULPROG   noesygpph
TD         2048
SOLVENT   DMSO
NS         8
DS         8
SWH       4401.409 Hz
FIDRES    4.298251 Hz
AQ         0.2327028 sec
RG         112.48
DW         113.600 usec
DE         6.50 usec
TE         300.1 K
D0         0.00010087 sec
D1         2.00000000 sec
D8         0.80000001 sec
D16        0.00020000 sec
IN0        0.00022720 sec
ND0        1
TD         200
SFO1      400.1728 MHz
FIDRES    22.007042 Hz
SW         10.999 ppr
FnMODE    TPPI
SI         1024
SF         400.1699771 MHz
WDW        QSINE
SSB        2
LB         0.00 Hz
GB         0
PC         1.00
SI         1024
MC2        TPPI
SF         400.1699772 MHz
WDW        QSINE
SSB        2
LB         0.00 Hz
GB         0
    
```

Compound ID: GK-D5

EW13860-33-P1A DMSO Bruker\_F\_400MHz

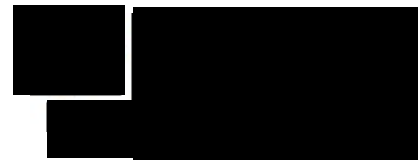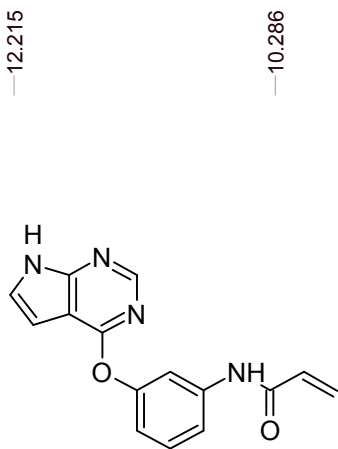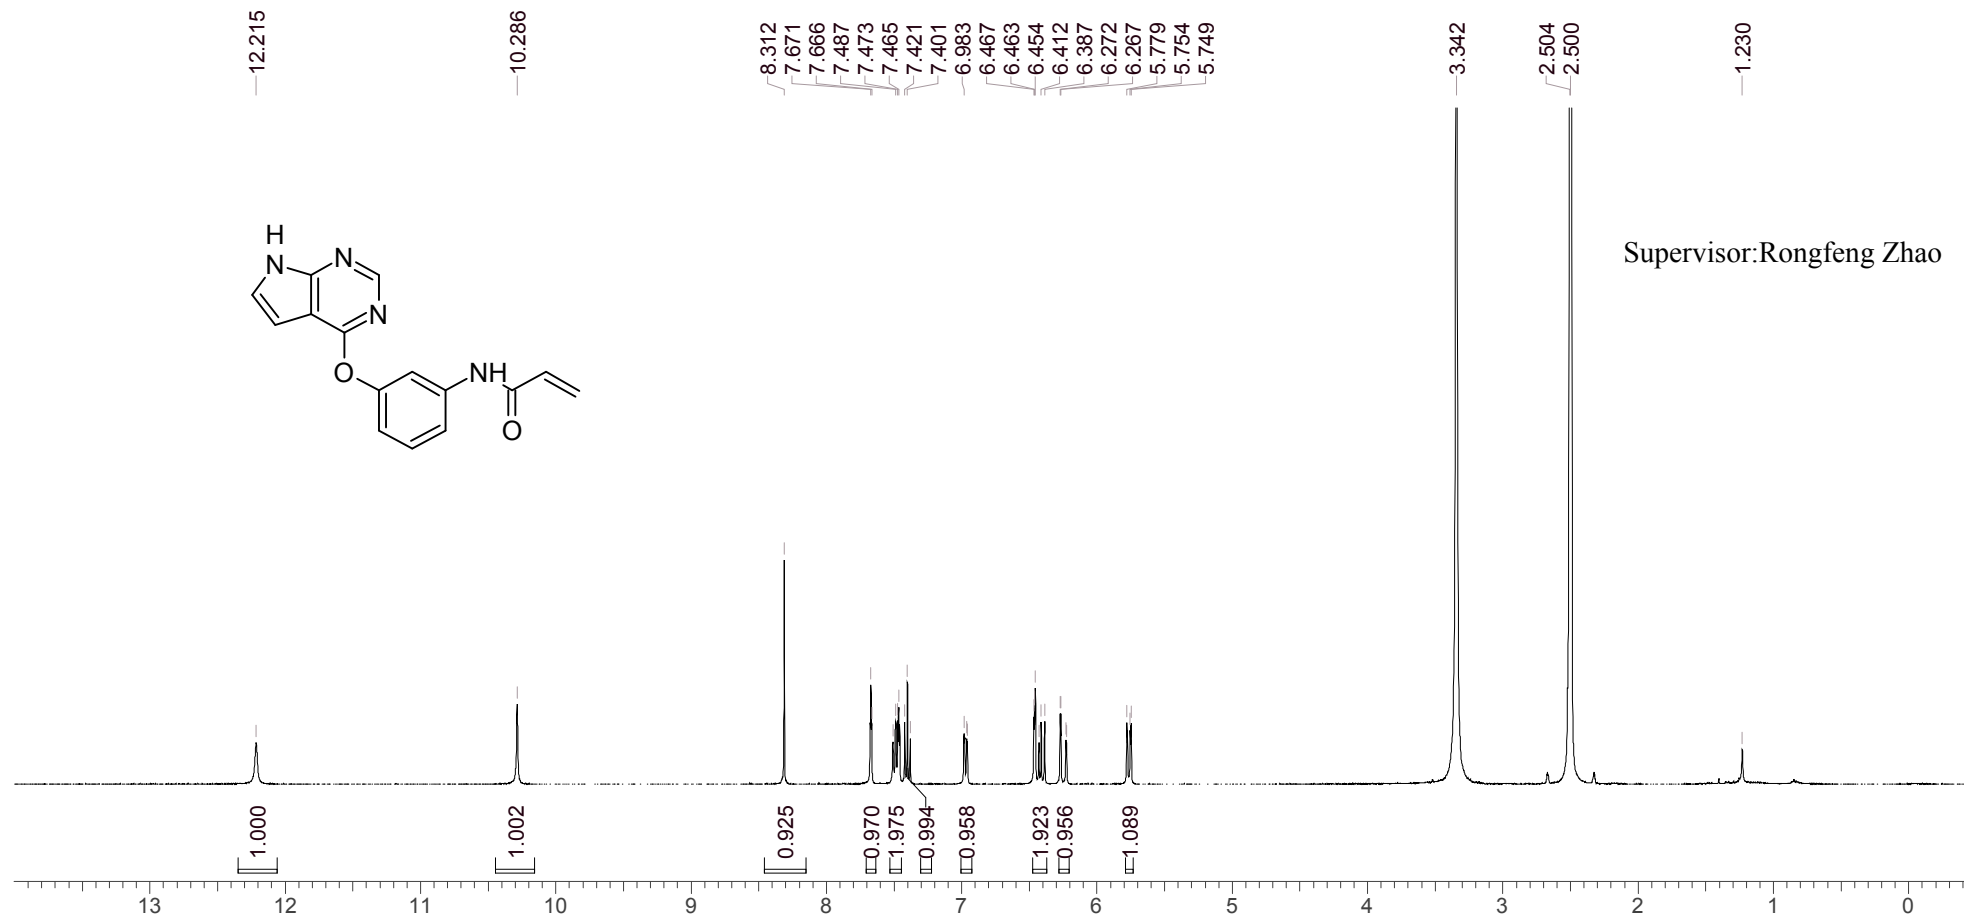

Supervisor: Rongfeng Zhao

Operator:

Date:

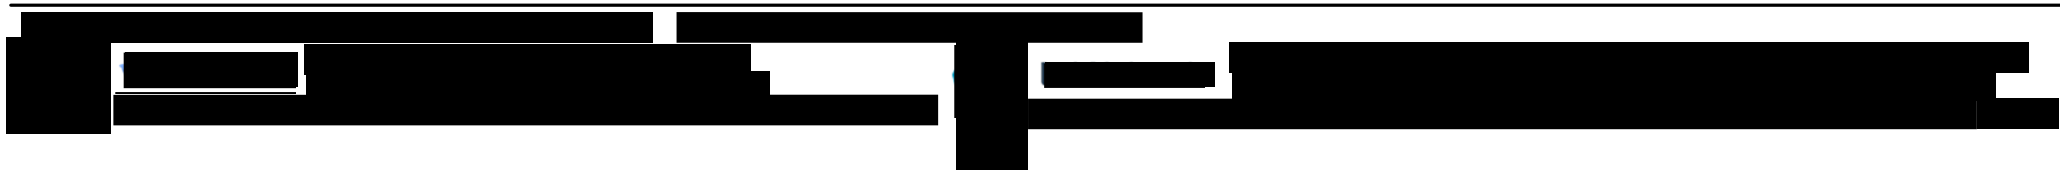

# LCMS REPORT

---

Compound ID : GK-D5  
 Sample ID : EW13860-33-P1B  
 Injection Vol : 5ul  
 Location : vial9  
 Acq Method : d:\method\5-95CD\_R\_220&254\_POS.lcm  
 Org DataFile : D:\DATA\1809\180903\EW13860-33-P1B.lcd  
 Injection Date : 9/3/2018 8:00:36 PM  
 Instrument : LCMS-W 17-102

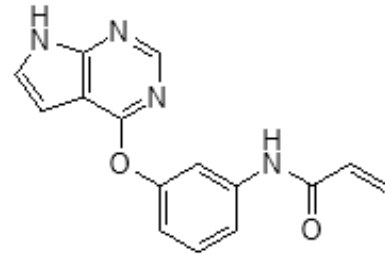

Exact Mass: 280.10

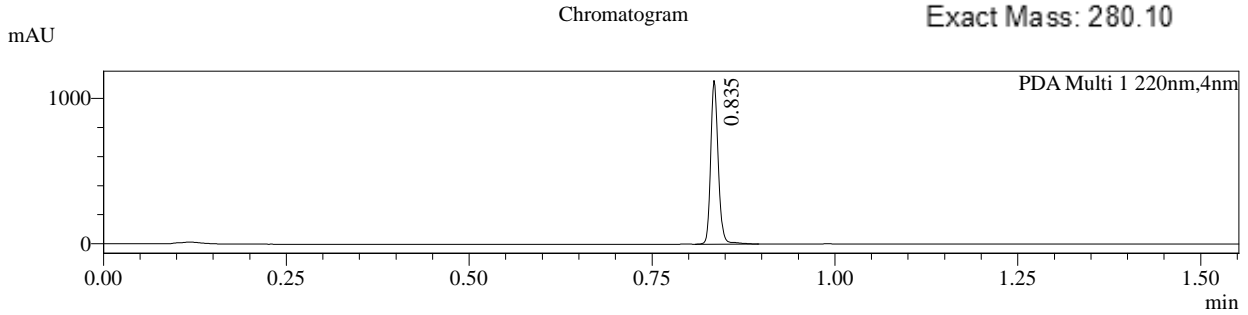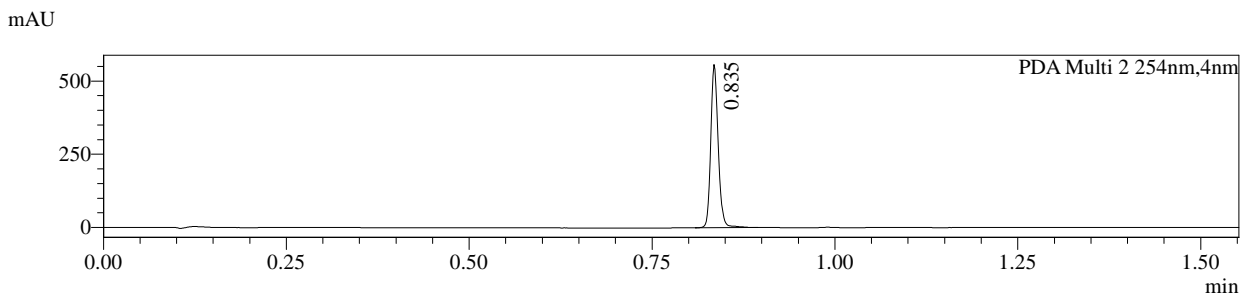

- 1 PDA Multi 1 / 220nm,4nm
- 2 PDA Multi 2 / 254nm,4nm

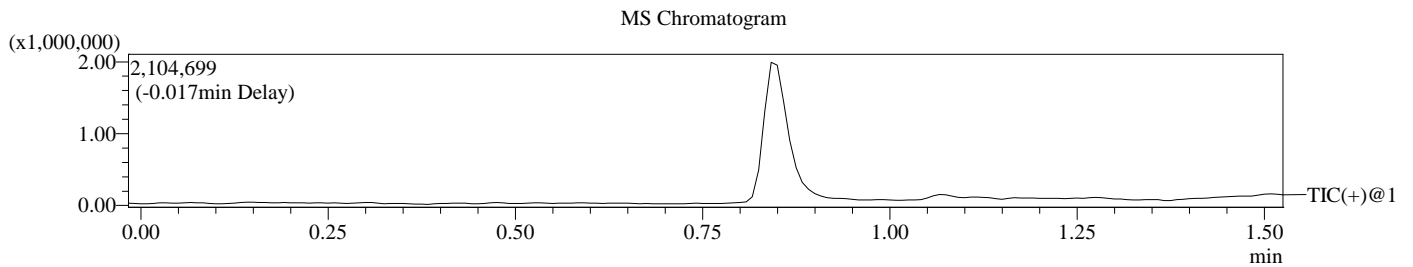


---

### Integration Result

---

#### Peak Table

PDA Ch1 220nm

| Peak# | Ret. Time | Height  | Height% | USP Width | Area   | Area%   |
|-------|-----------|---------|---------|-----------|--------|---------|
| 1     | 0.835     | 1126303 | 100.000 | 0.021     | 815742 | 100.000 |

#### Peak Table

PDA Ch2 254nm

| Peak# | Ret. Time | Height | Height% | USP Width | Area   | Area%   |
|-------|-----------|--------|---------|-----------|--------|---------|
| 1     | 0.835     | 557590 | 100.000 | 0.021     | 399685 | 100.000 |

Operator: \_\_\_\_\_

Date: \_\_\_\_\_

Mass Spectrum  
RefTime: 0.833 Datafile: D:\DATA\1809\180903\EW13860-33-P1B.lcd

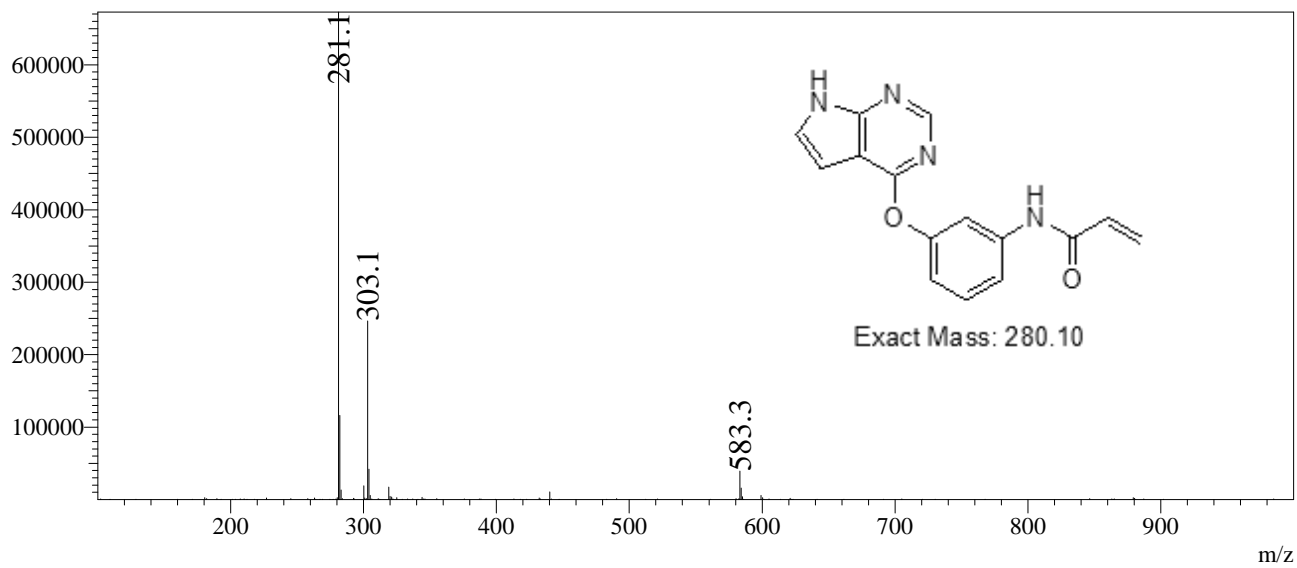

# HPLC REPORT

Compound ID : GK-D5  
 Sample ID : EW13860-33-P1B  
 Vial# : 56  
 Injection Volumn : 4  
 Filename : D:\DATA\2018\1809\180904\EW13860-33-P1B.lcd  
 Method Name : D:\Method\10-80CD\_4min.lcm  
 Instrument : HPLC-J  
 Run time : 9/4/2018 10:56:15

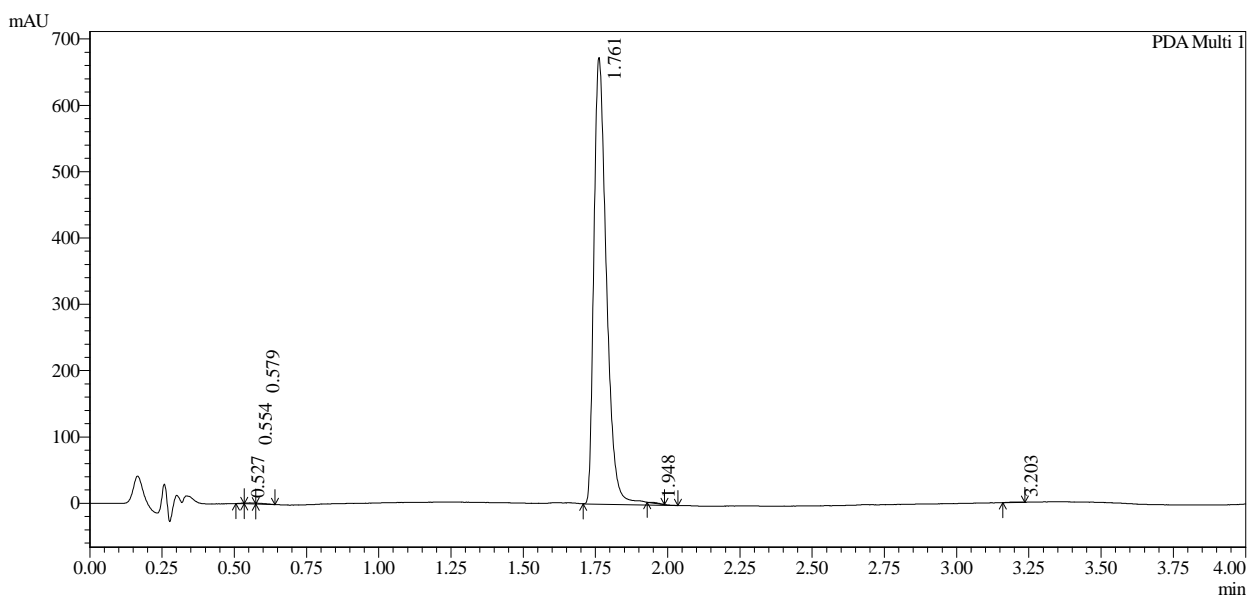

1 PDA Multi 1 / 220nm,4nm

-----  
 Integration result  
 -----

PeakTable

PDA Ch1 220nm

| Peak# | Ret. Time | USP Width | Resolution | Height | Area    | Area %  |
|-------|-----------|-----------|------------|--------|---------|---------|
| 1     | 0.527     | 0.062     | 0.000      | 998    | 1100    | 0.054   |
| 2     | 0.554     | 0.169     | 0.233      | 1642   | 3480    | 0.170   |
| 3     | 0.579     | 0.119     | 0.174      | 1589   | 3290    | 0.160   |
| 4     | 1.761     | 0.079     | 11.956     | 673428 | 2038816 | 99.441  |
| 5     | 1.948     | 0.053     | 2.825      | 1000   | 1951    | 0.095   |
| 6     | 3.203     | 0.069     | 20.512     | 686    | 1635    | 0.080   |
| Total |           |           |            | 679342 | 2050272 | 100.000 |

Operator : \_\_\_\_\_

Date : \_\_\_\_\_

# HPLC REPORT

Compound ID : GK-D5  
Sample ID : EW13860-33-P1B  
Filename : D:\DATA\2018\1809\180904\EW13860-33-P1B.lcd  
Method Name : D:\Method\10-80CD\_4min.lcm  
Instrument & Column : HPLC-J  
Run time : 9/4/2018 10:56:15

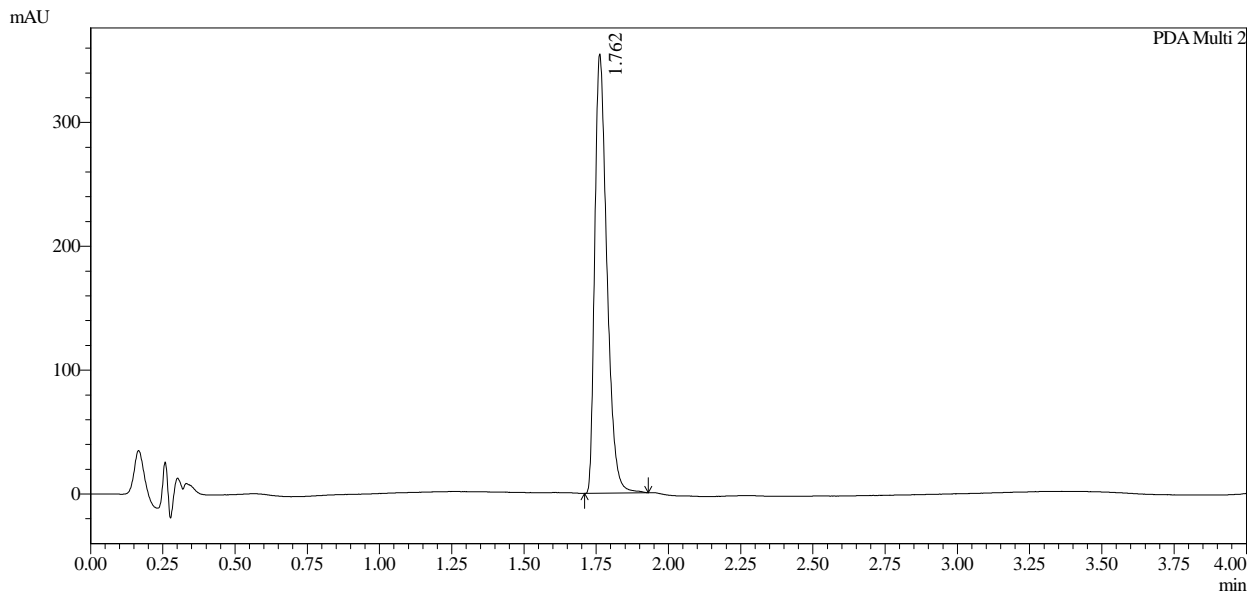

-----  
Integration result  
-----

PeakTable

PDA Ch2 254nm

| Peak# | Ret. Time | USP Width | Resolution | Height | Area    | Area %  |
|-------|-----------|-----------|------------|--------|---------|---------|
| 1     | 1.762     | 0.077     | 0.000      | 354845 | 1037414 | 100.000 |
| Total |           |           |            | 354845 | 1037414 | 100.000 |

Operator : \_\_\_\_\_

Date : \_\_\_\_\_



# HPLC REPORT

Compound ID : GK-D5  
 Sample ID : EW13860-33-P1B  
 Filename : D:\DATA\2018\1809\180904\EW13860-33-P1B.lcd  
 Method Name : D:\Method\10-80CD\_4min.lcm  
 Instrument & Column : HPLC-J  
 Run time : 9/4/2018 10:56:15

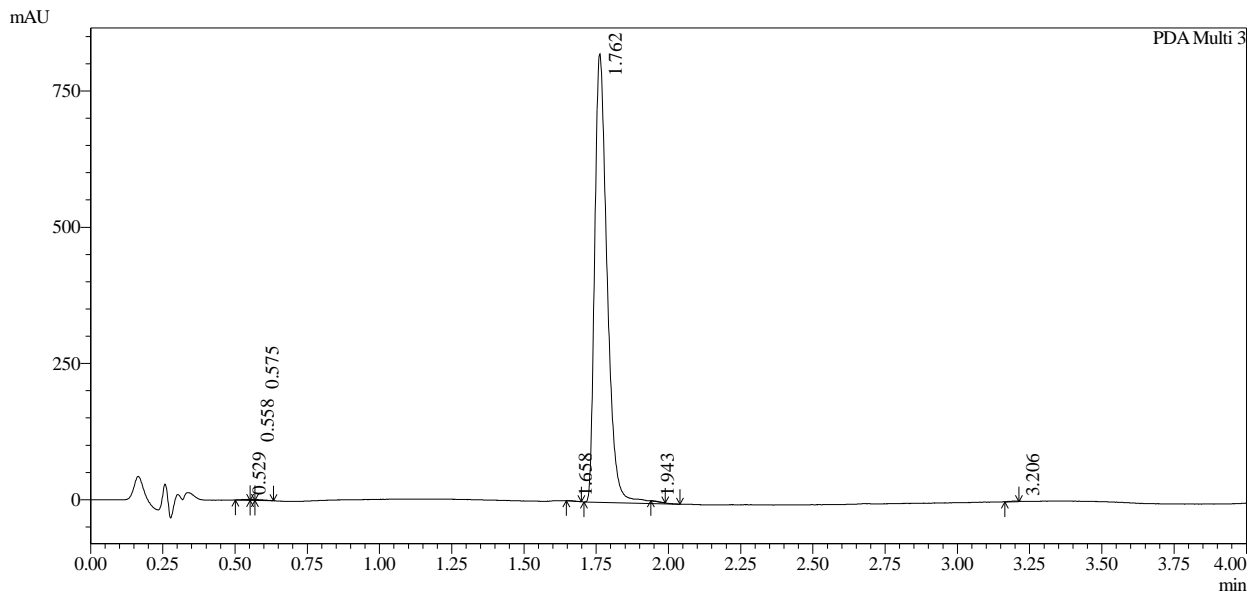

1 PDA Multi 3 / 215nm,4nm

-----  
 Integration result  
 -----

PeakTable

| PDA Ch3 215nm |           |           |            |        |         |         |
|---------------|-----------|-----------|------------|--------|---------|---------|
| Peak#         | Ret. Time | USP Width | Resolution | Height | Area    | Area %  |
| 1             | 0.529     | 0.074     | 0.000      | 1370   | 3106    | 0.125   |
| 2             | 0.558     | 0.087     | 0.357      | 1855   | 1795    | 0.072   |
| 3             | 0.575     | 0.096     | 0.182      | 1755   | 3661    | 0.148   |
| 4             | 1.658     | 0.042     | 15.675     | 656    | 1285    | 0.052   |
| 5             | 1.762     | 0.078     | 1.719      | 822771 | 2466076 | 99.455  |
| 6             | 1.943     | 0.045     | 2.945      | 478    | 1380    | 0.056   |
| 7             | 3.206     | 0.057     | 24.885     | 946    | 2287    | 0.092   |
| Total         |           |           |            | 829832 | 2479591 | 100.000 |

Operator : \_\_\_\_\_

Date : \_\_\_\_\_

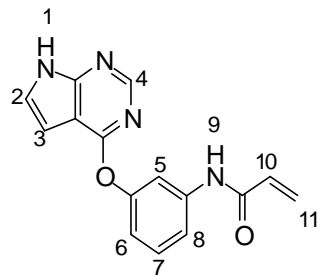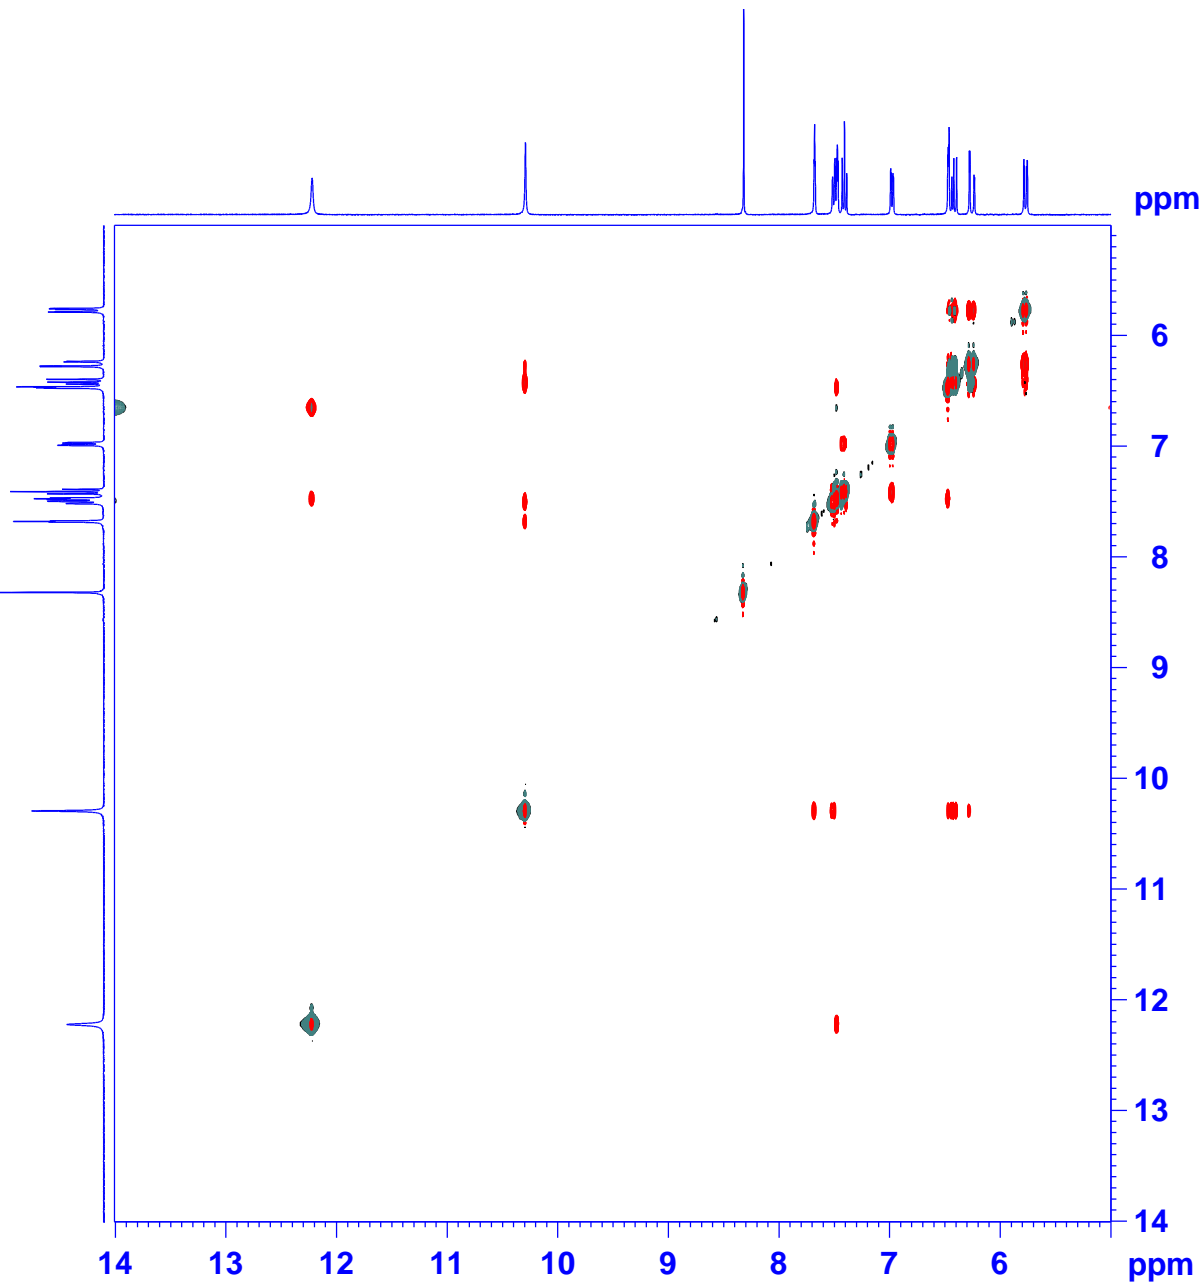

|         |                 |
|---------|-----------------|
| NAME    | EW13860-33-P1B  |
| EXPNO   | 2               |
| PROCNO  | 1               |
| Date_   | 20180904        |
| Time    | 22.57 h         |
| INSTRUM | spect           |
| PROBHD  | Z116098_0689 (  |
| PULPROG | noesygpqh       |
| TD      | 2048            |
| SOLVENT | DMSO            |
| NS      | 12              |
| DS      | 8               |
| SWH     | 3605.769 Hz     |
| FIDRES  | 3.521259 Hz     |
| AQ      | 0.2840393 sec   |
| RG      | 80.69           |
| DW      | 138.667 usec    |
| DE      | 6.50 usec       |
| TE      | 300.2 K         |
| D0      | 0.00012607 sec  |
| D1      | 2.00000000 sec  |
| D8      | 0.80000001 sec  |
| D16     | 0.00020000 sec  |
| IN0     | 0.00027760 sec  |
| ND0     | 1               |
| TD      | 200             |
| SFO1    | 400.1738 MHZ    |
| FIDRES  | 18.011528 Hz    |
| SW      | 9.002 ppr       |
| FnMODE  | TPPI            |
| SI      | 1024            |
| SF      | 400.1699986 MHZ |
| WDW     | QSINE           |
| SSB     | 2               |
| LB      | 0.00 Hz         |
| GB      | 0               |
| PC      | 1.00            |
| SI      | 1024            |
| MC2     | TPPI            |
| SF      | 400.1699975 MHZ |
| WDW     | QSINE           |
| SSB     | 2               |
| LB      | 0.00 Hz         |
| GB      | 0               |

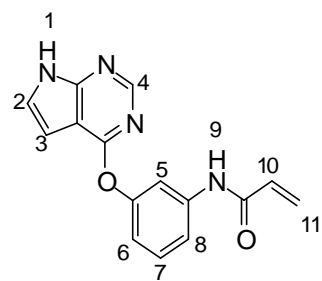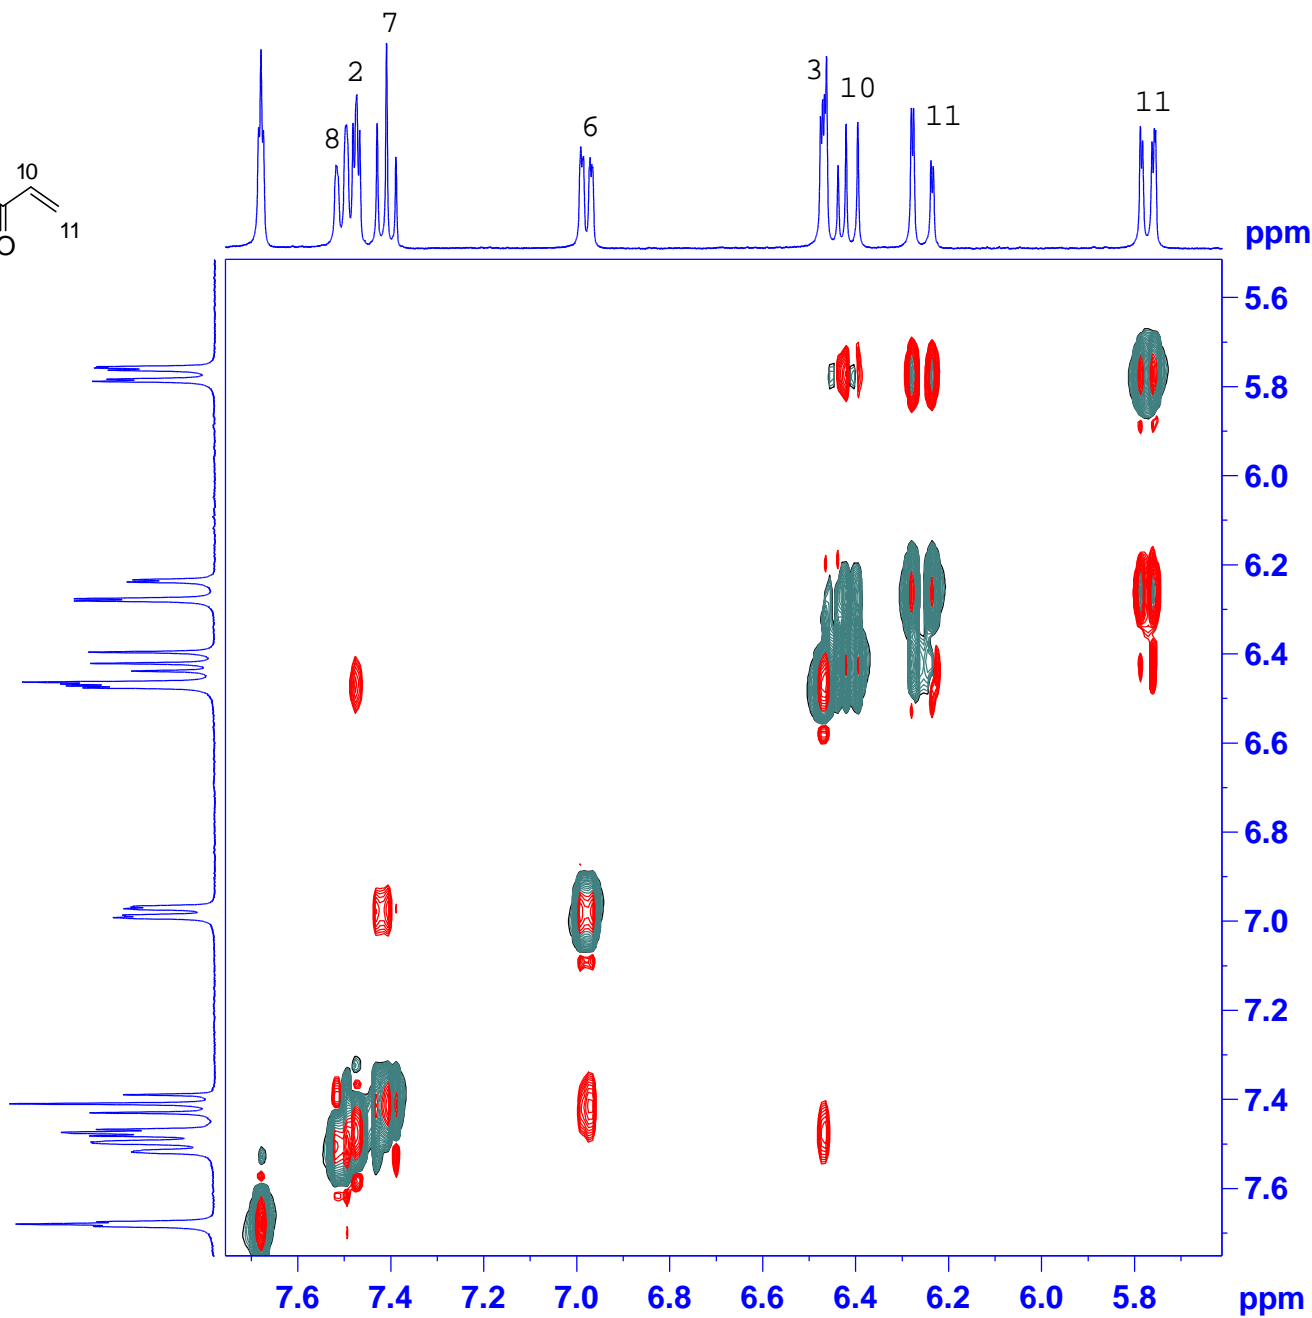

|         |                 |
|---------|-----------------|
| NAME    | EW13860-33-P1B  |
| EXPNO   | 2               |
| PROCNO  | 1               |
| Date_   | 20180904        |
| Time    | 22.57 h         |
| INSTRUM | spect           |
| PROBHD  | Z116098_0689 (  |
| PULPROG | noesygpqh       |
| TD      | 2048            |
| SOLVENT | DMSO            |
| NS      | 12              |
| DS      | 8               |
| SWH     | 3605.769 Hz     |
| FIDRES  | 3.521259 Hz     |
| AQ      | 0.2840393 sec   |
| RG      | 80.69           |
| DW      | 138.667 usec    |
| DE      | 6.50 usec       |
| TE      | 300.2 K         |
| D0      | 0.00012607 sec  |
| D1      | 2.00000000 sec  |
| D8      | 0.80000001 sec  |
| D16     | 0.00020000 sec  |
| IN0     | 0.00027760 sec  |
| ND0     | 1               |
| TD      | 200             |
| SFO1    | 400.1738 MH:    |
| FIDRES  | 18.011528 Hz    |
| SW      | 9.002 ppr       |
| FnMODE  | TPPI            |
| SI      | 1024            |
| SF      | 400.1699986 MH: |
| WDW     | QSINE           |
| SSB     | 2               |
| LB      | 0.00 Hz         |
| GB      | 0               |
| PC      | 1.00            |
| SI      | 1024            |
| MC2     | TPPI            |
| SF      | 400.1699975 MH: |
| WDW     | QSINE           |
| SSB     | 2               |
| LB      | 0.00 Hz         |
| GB      | 0               |

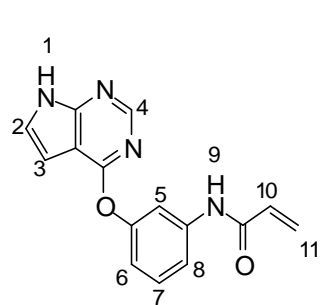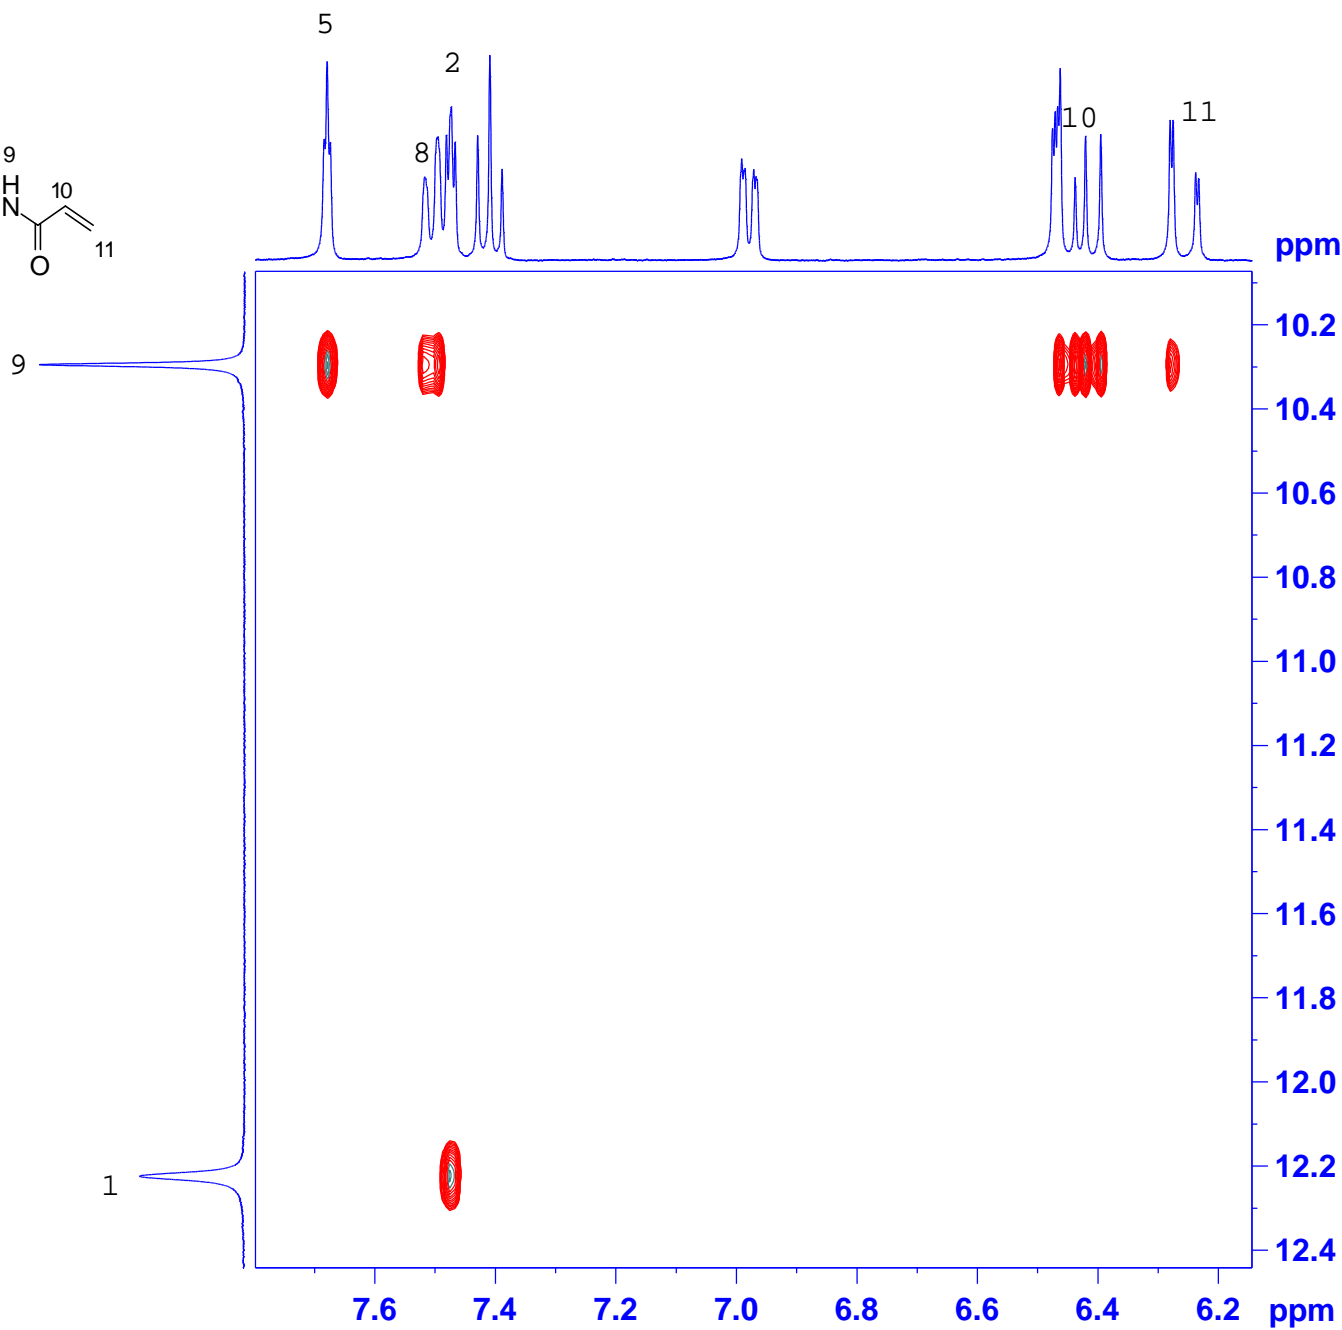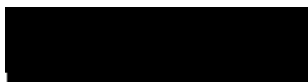

|         |                 |
|---------|-----------------|
| NAME    | EW13860-33-P1B  |
| EXPNO   | 2               |
| PROCNO  | 1               |
| Date_   | 20180904        |
| Time    | 22.57 h         |
| INSTRUM | spect           |
| PROBHD  | Z116098_0689 (  |
| PULPROG | noesygpqh       |
| TD      | 2048            |
| SOLVENT | DMSO            |
| NS      | 12              |
| DS      | 8               |
| SWH     | 3605.769 Hz     |
| FIDRES  | 3.521259 Hz     |
| AQ      | 0.2840393 sec   |
| RG      | 80.69           |
| DW      | 138.667 usec    |
| DE      | 6.50 usec       |
| TE      | 300.2 K         |
| D0      | 0.00012607 sec  |
| D1      | 2.00000000 sec  |
| D8      | 0.80000001 sec  |
| D16     | 0.00020000 sec  |
| IN0     | 0.00027760 sec  |
| ND0     | 1               |
| TD      | 200             |
| SFO1    | 400.1738 MHZ    |
| FIDRES  | 18.011528 Hz    |
| SW      | 9.002 ppr       |
| FnMODE  | TPPI            |
| SI      | 1024            |
| SF      | 400.1699986 MHZ |
| WDW     | QSINE           |
| SSB     | 2               |
| LB      | 0.00 Hz         |
| GB      | 0               |
| PC      | 1.00            |
| SI      | 1024            |
| MC2     | TPPI            |
| SF      | 400.1699975 MHZ |
| WDW     | QSINE           |
| SSB     | 2               |
| LB      | 0.00 Hz         |
| GB      | 0               |

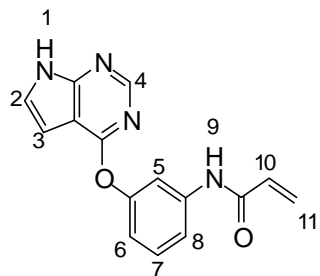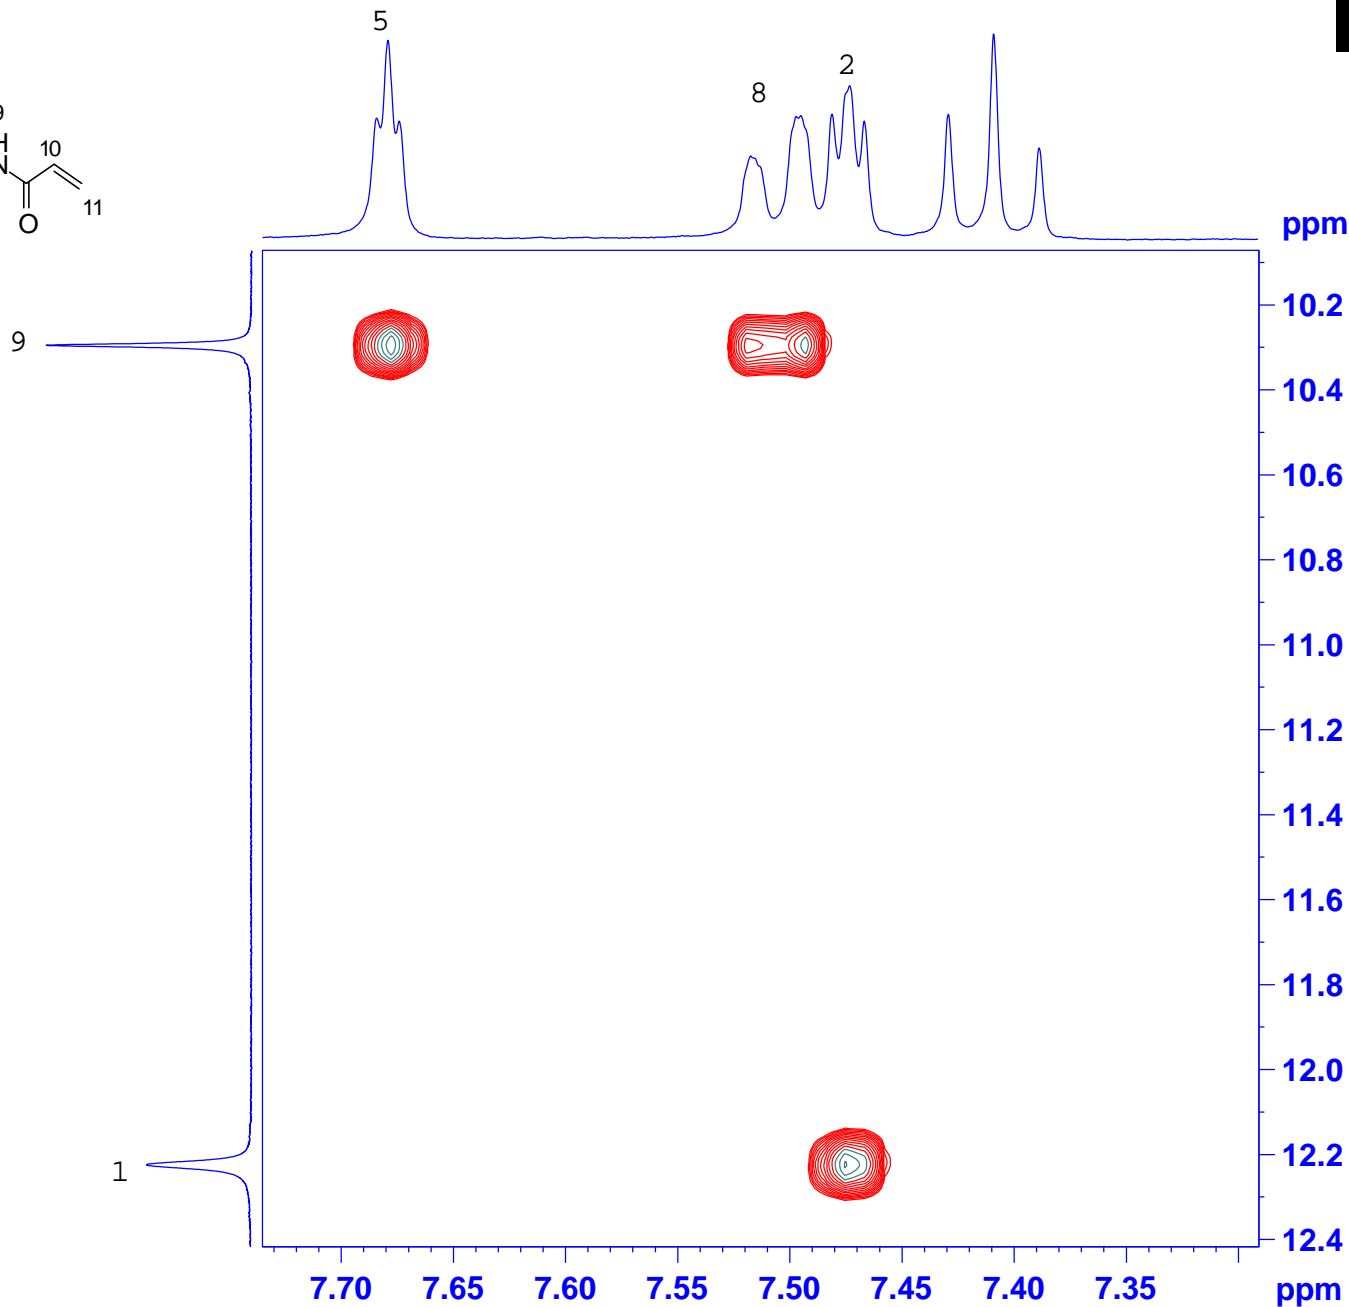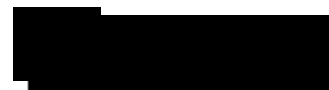

|         |                 |
|---------|-----------------|
| NAME    | EW13860-33-P1B  |
| EXPNO   | 2               |
| PROCNO  | 1               |
| Date_   | 20180904        |
| Time    | 22.57 h         |
| INSTRUM | spect           |
| PROBHD  | Z116098_0689 (  |
| PULPROG | noesygpph       |
| TD      | 2048            |
| SOLVENT | DMSO            |
| NS      | 12              |
| DS      | 8               |
| SWH     | 3605.769 Hz     |
| FIDRES  | 3.521259 Hz     |
| AQ      | 0.2840393 sec   |
| RG      | 80.69           |
| DW      | 138.667 usec    |
| DE      | 6.50 usec       |
| TE      | 300.2 K         |
| D0      | 0.00012607 sec  |
| D1      | 2.00000000 sec  |
| D8      | 0.80000001 sec  |
| D16     | 0.00020000 sec  |
| IN0     | 0.00027760 sec  |
| ND0     | 1               |
| TD      | 200             |
| SFO1    | 400.1738 MH:    |
| FIDRES  | 18.011528 Hz    |
| SW      | 9.002 ppr       |
| FnMODE  | TPPI            |
| SI      | 1024            |
| SF      | 400.1699986 MH: |
| WDW     | QSINE           |
| SSB     | 2               |
| LB      | 0.00 Hz         |
| GB      | 0               |
| PC      | 1.00            |
| SI      | 1024            |
| MC2     | TPPI            |
| SF      | 400.1699975 MH: |
| WDW     | QSINE           |
| SSB     | 2               |
| LB      | 0.00 Hz         |
| GB      | 0               |

Compound ID: GK-D6

EW13860-48-P1A DMSO Bruker\_D\_400MHz

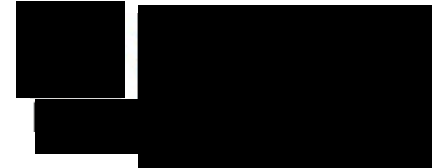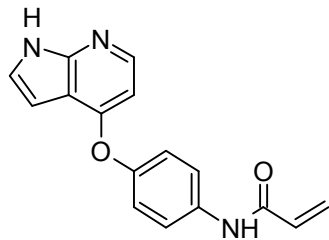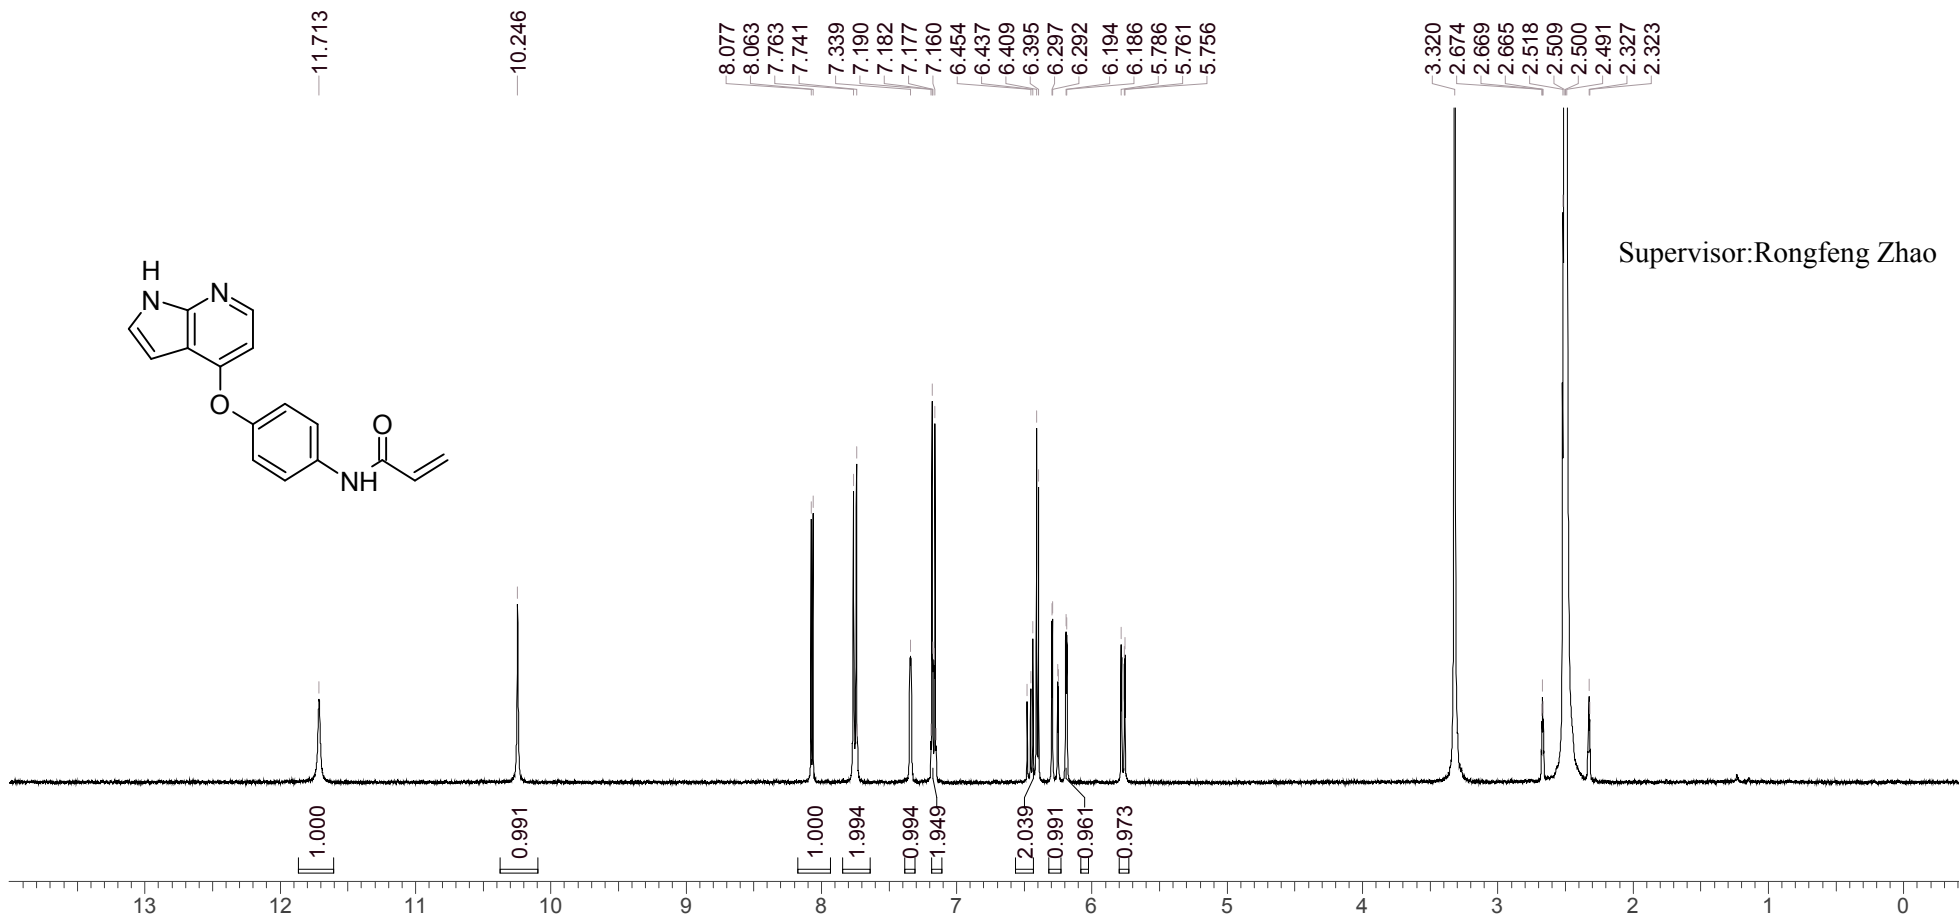

Supervisor: Rongfeng Zhao

Operator:

Date:

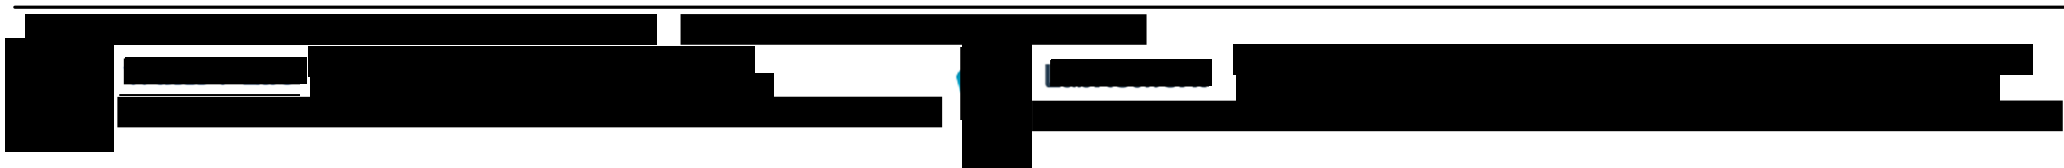

# LCMS REPORT

---

Compound ID : GK-D6  
 Sample ID : EW13860-48-P1G  
 Injection Vol : 4ul  
 Location : vial62  
 Acq Method : d:\method\5-95CD\_R\_220&254\_POS.lcm  
 Org DataFile : D:\DATA\1809\180914\EW13860-48-P1G.lcd  
 Injection Date : 9/14/2018 9:57:45 AM  
 Instrument : LCMS-W 17-102

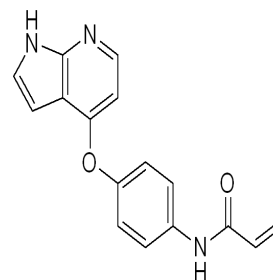

Exact Mass: 279.10

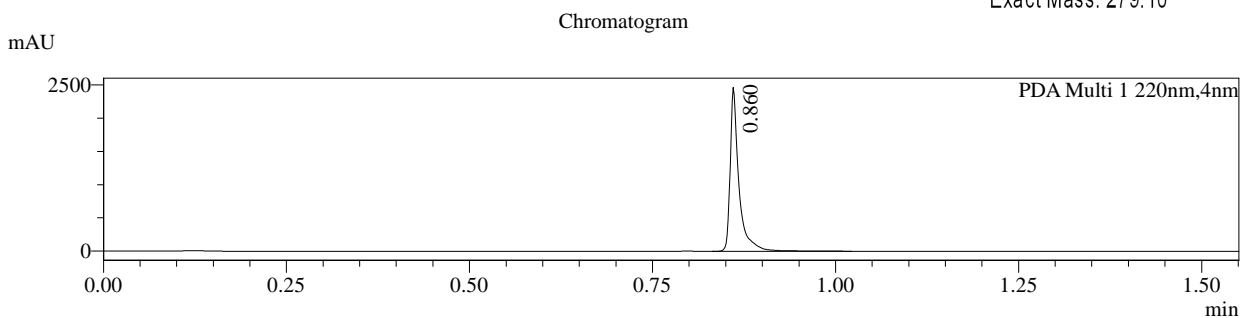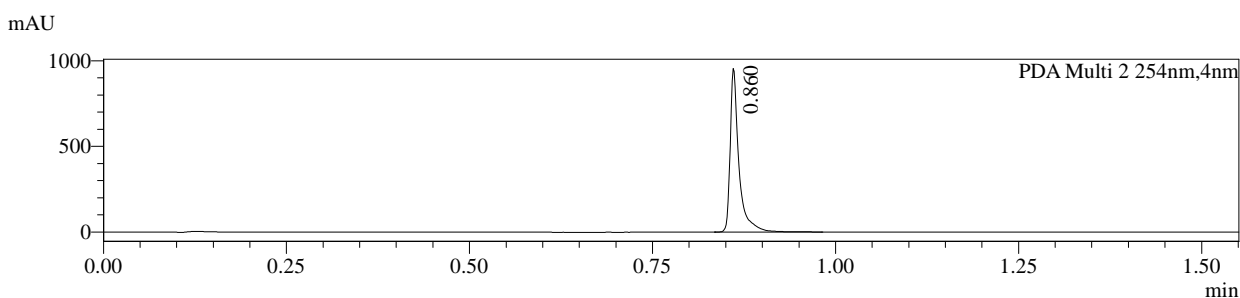

- 1 PDA Multi 1 / 220nm,4nm
- 2 PDA Multi 2 / 254nm,4nm

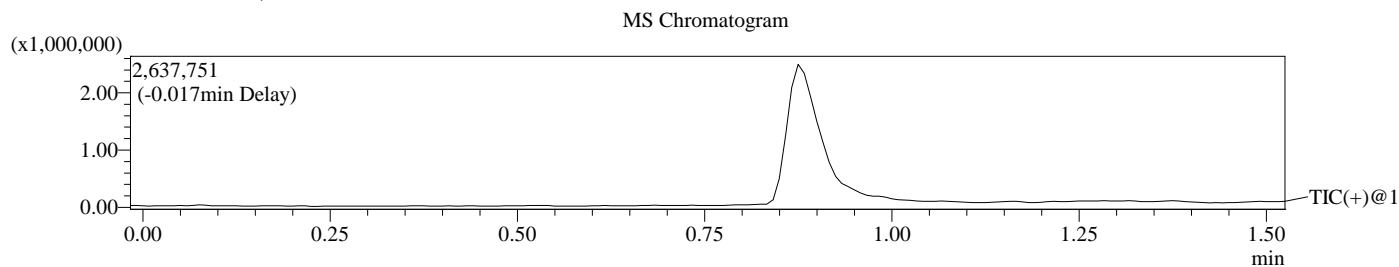


---

### Integration Result

---

#### Peak Table

PDA Ch1 220nm

| Peak# | Ret. Time | Height  | Height% | USP Width | Area    | Area%   |
|-------|-----------|---------|---------|-----------|---------|---------|
| 1     | 0.860     | 2462819 | 100.000 | 0.022     | 2044073 | 100.000 |

#### Peak Table

PDA Ch2 254nm

| Peak# | Ret. Time | Height | Height% | USP Width | Area   | Area%   |
|-------|-----------|--------|---------|-----------|--------|---------|
| 1     | 0.860     | 955200 | 100.000 | 0.022     | 797770 | 100.000 |

Operator:\_\_\_\_\_

Date:\_\_\_\_\_



Mass Spectrum  
RefTime: 0.858 Datafile: D:\DATA\1809\180914\EW13860-48-P1G.lcd

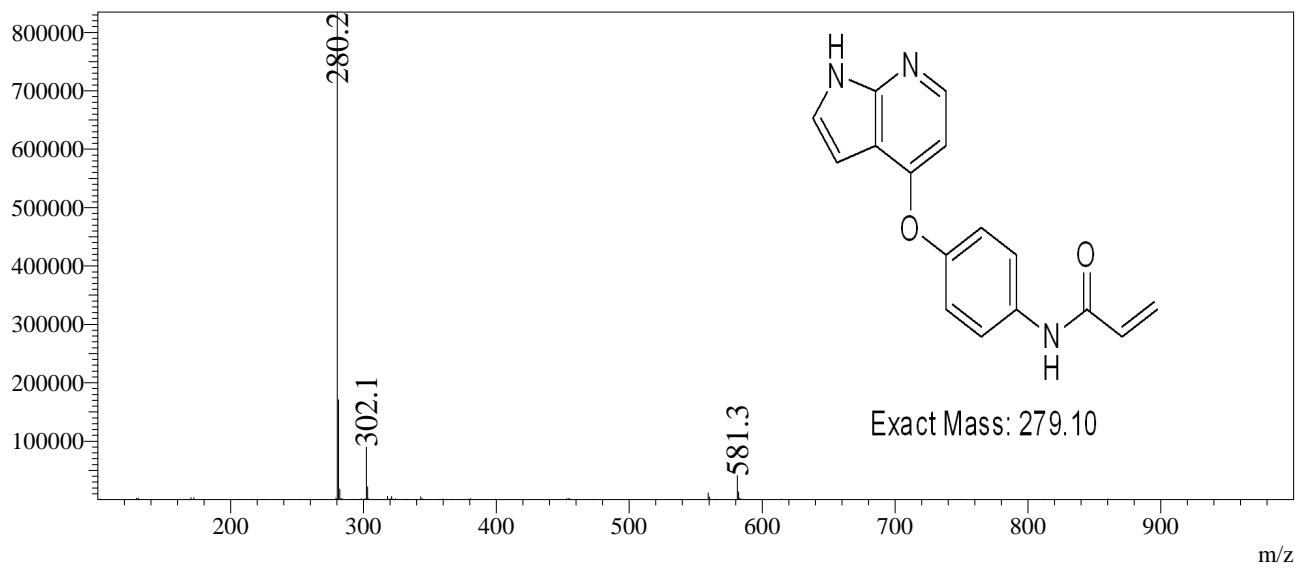

# HPLC REPORT

Compound ID : GK-D6  
 Sample ID : EW13860-48-P1C  
 Vial# : 30  
 Injection Volumn : 2  
 Filename : D:\DATA\2018\1809\180914\EW13860-48-P1C.lcd  
 Method Name : D:\Method\10-80CD\_4min.lcm  
 Instrument : HPLC-J  
 Run time : 9/14/2018 10:58:03

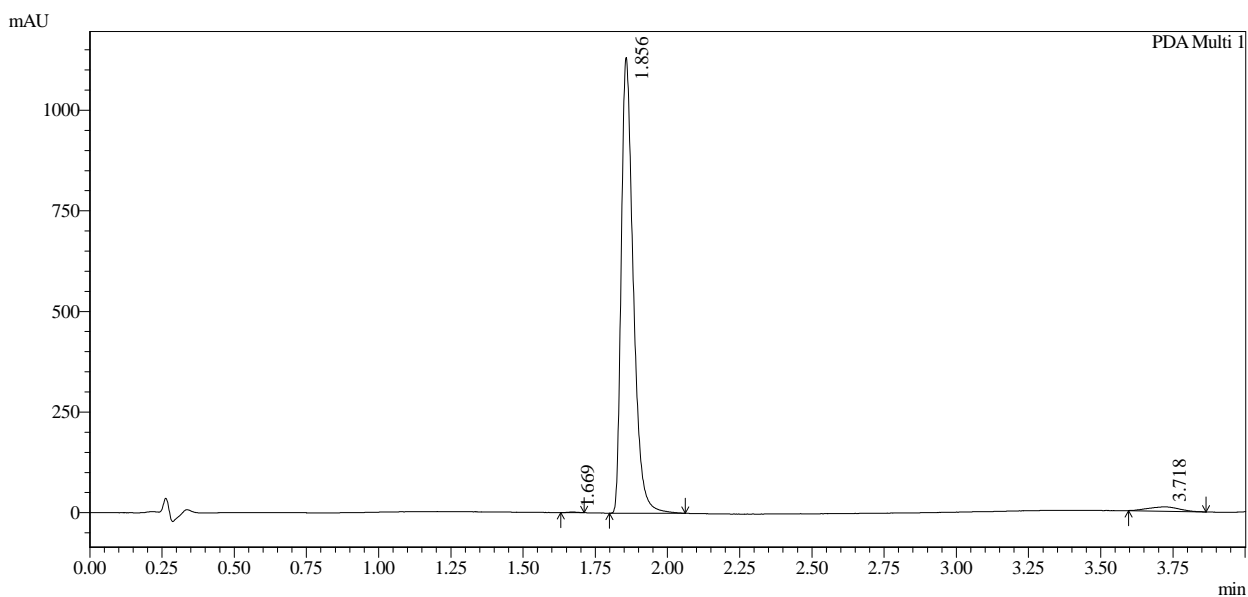

1 PDA Multi 1 / 220nm,4nm

-----  
 Integration result  
 -----

PeakTable

| PDA Ch1 220nm |           |           |            |         |         |         |  |
|---------------|-----------|-----------|------------|---------|---------|---------|--|
| Peak#         | Ret. Time | USP Width | Resolution | Height  | Area    | Area %  |  |
| 1             | 1.669     | 0.065     | 0.000      | 1717    | 4144    | 0.123   |  |
| 2             | 1.856     | 0.076     | 2.673      | 1132252 | 3279379 | 97.438  |  |
| 3             | 3.718     | 0.206     | 13.244     | 10933   | 82092   | 2.439   |  |
| Total         |           |           |            | 1144902 | 3365614 | 100.000 |  |

Operator : \_\_\_\_\_

Date : \_\_\_\_\_

# HPLC REPORT

Compound ID : GK-D6  
Sample ID : EW13860-48-P1C  
Filename : D:\DATA\2018\1809\180914\EW13860-48-P1C.lcd  
Method Name : D:\Method\10-80CD\_4min.lcm  
Instrument & Column : HPLC-J  
Run time : 9/14/2018 10:58:03

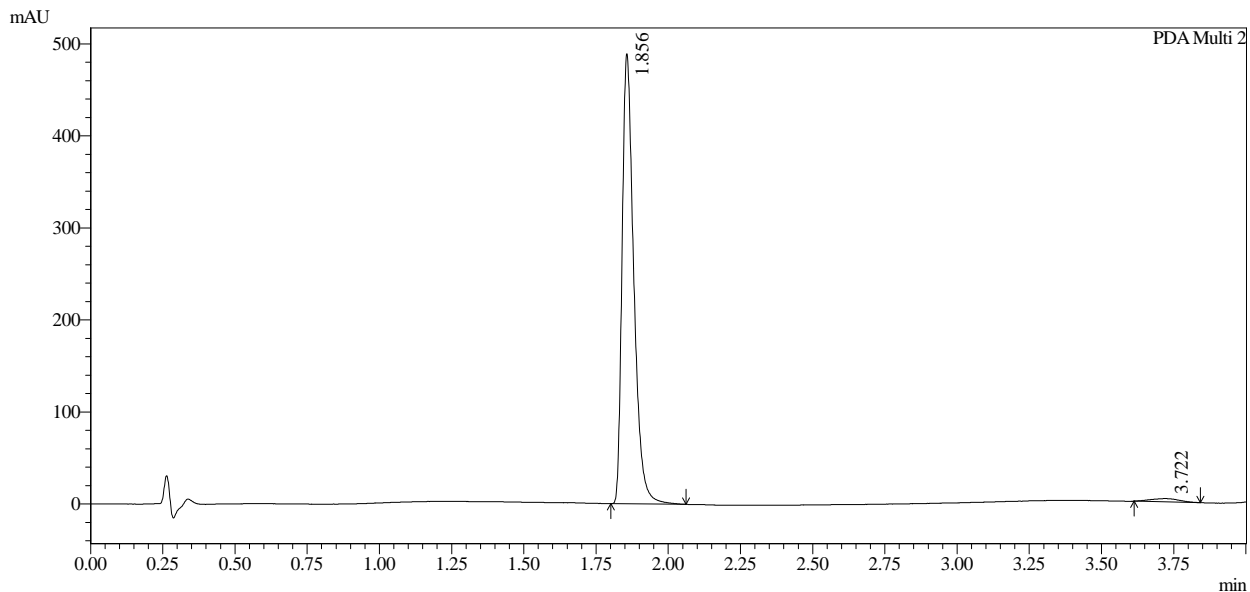

1 PDA Multi 2 / 254nm,4nm

-----  
Integration result  
-----

PeakTable

PDA Ch2 254nm

| Peak# | Ret. Time | USP Width | Resolution | Height | Area    | Area %  |
|-------|-----------|-----------|------------|--------|---------|---------|
| 1     | 1.856     | 0.073     | 0.000      | 488951 | 1377702 | 98.261  |
| 2     | 3.722     | 0.187     | 14.328     | 3622   | 24378   | 1.739   |
| Total |           |           |            | 492573 | 1402080 | 100.000 |

Operator : \_\_\_\_\_

Date : \_\_\_\_\_

# HPLC REPORT

Compound ID : GK-D6  
 Sample ID : EW13860-48-P1C  
 Filename : D:\DATA\2018\1809\180914\EW13860-48-P1C.lcd  
 Method Name : D:\Method\10-80CD\_4min.lcm  
 Instrument & Column : HPLC-J  
 Run time : 9/14/2018 10:58:03

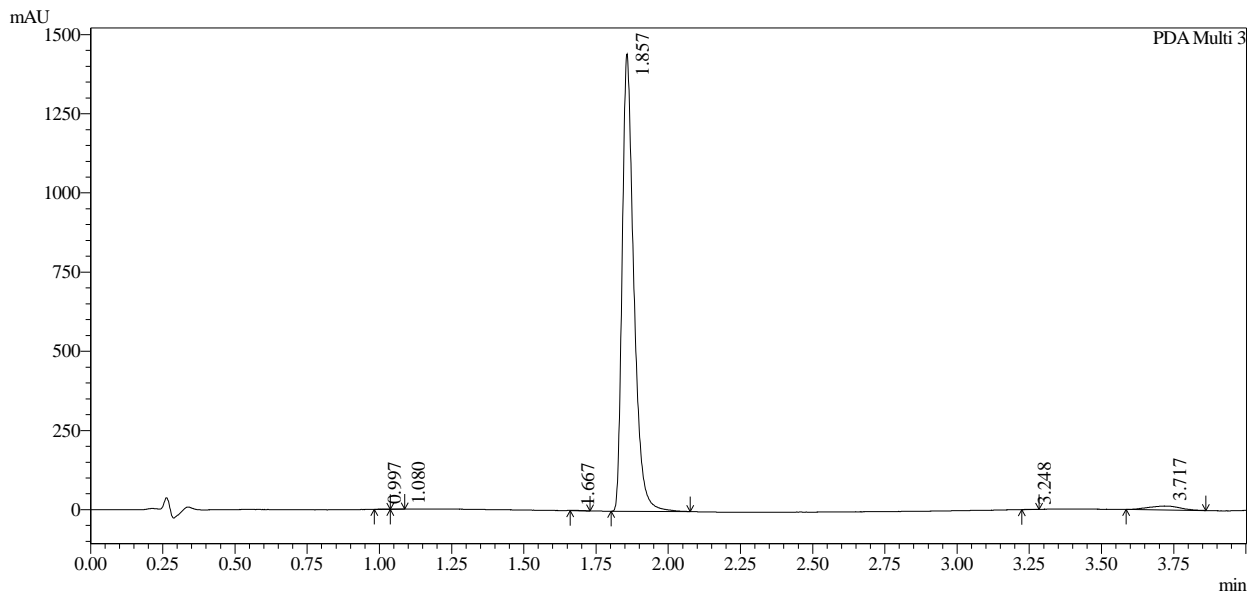

Integration result

PeakTable

PDA Ch3 215nm

| Peak# | Ret. Time | USP Width | Resolution | Height  | Area    | Area %  |
|-------|-----------|-----------|------------|---------|---------|---------|
| 1     | 0.997     | 0.063     | 0.000      | 606     | 1532    | 0.037   |
| 2     | 1.080     | 0.084     | 1.132      | 620     | 1441    | 0.035   |
| 3     | 1.667     | 0.067     | 7.789      | 1675    | 3526    | 0.085   |
| 4     | 1.857     | 0.074     | 2.690      | 1444189 | 4046426 | 97.517  |
| 5     | 3.248     | 0.047     | 23.025     | 431     | 1143    | 0.028   |
| 6     | 3.717     | 0.203     | 3.745      | 12546   | 95397   | 2.299   |
| Total |           |           |            | 1460066 | 4149465 | 100.000 |

Operator : \_\_\_\_\_

Date : \_\_\_\_\_

Compound ID: GK-D7

EW17394-6-P1B DMSO Bruker\_H\_400MHz

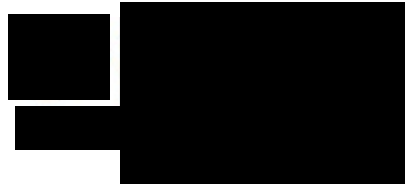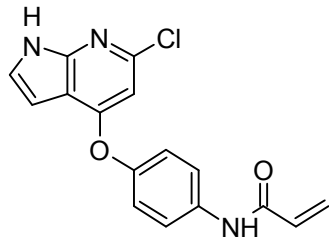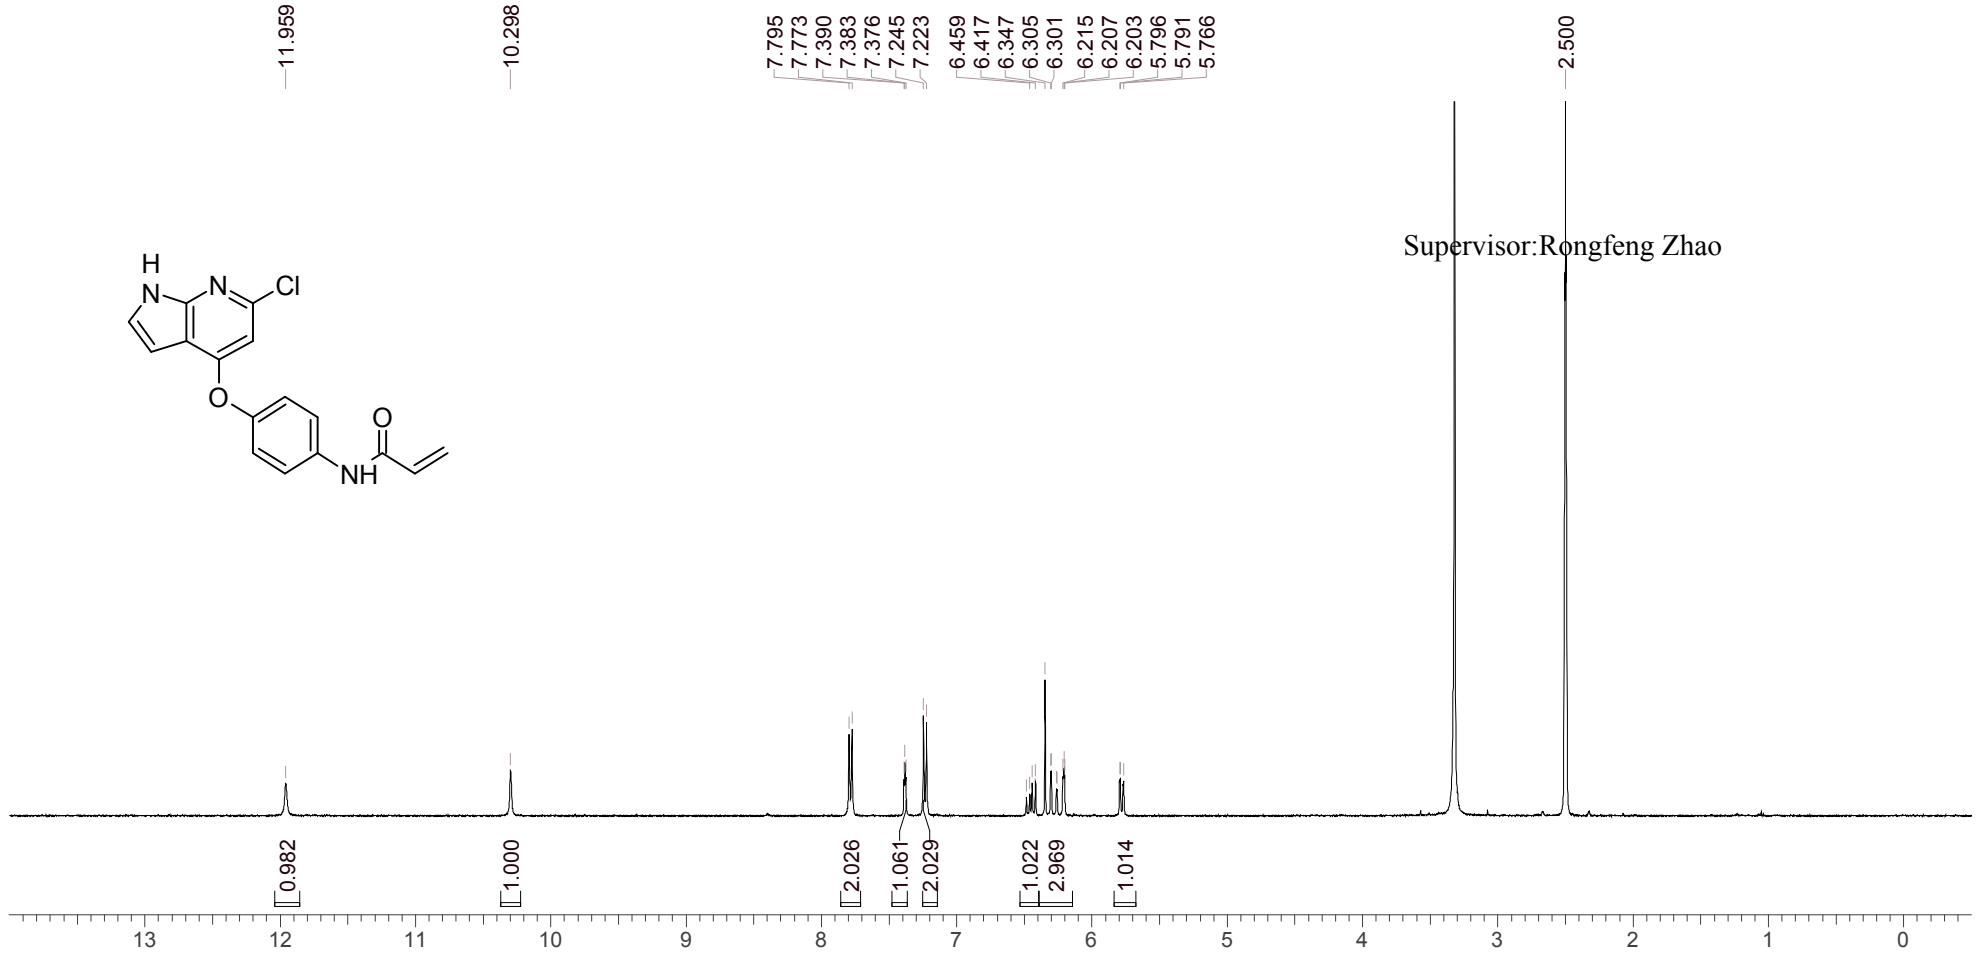

Supervisor: Rongfeng Zhao

Operator:

Date:

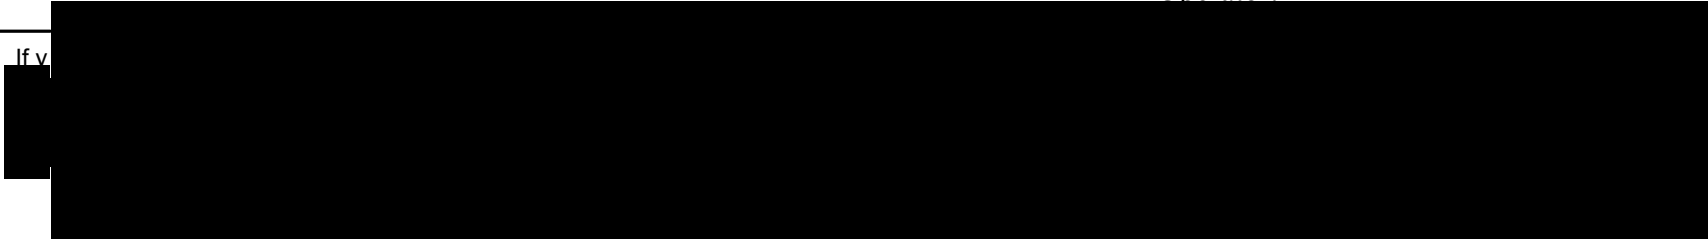

Please click below link to download

# LCMS REPORT

---

Compound ID : GK-D7  
 Sample ID : EW17394-6-P1B  
 Injection Vol : 2ul  
 Location : vial33  
 Acq Method : d:\method\5-95AB\_4min\_220&254.lcm  
 Org DataFile : D:\DATA\1903\190319\EW17394-6-P1B.lcd  
 Injection Date : 2019-03-19 20:30:12  
 Instrument : LCMS-I

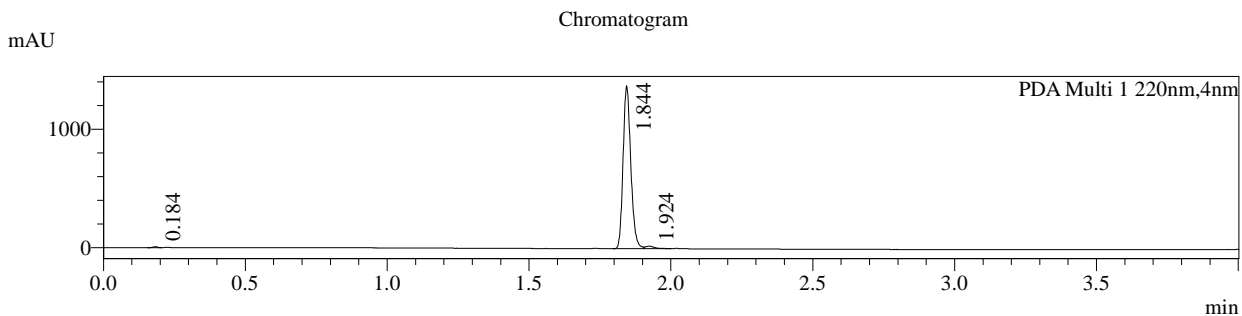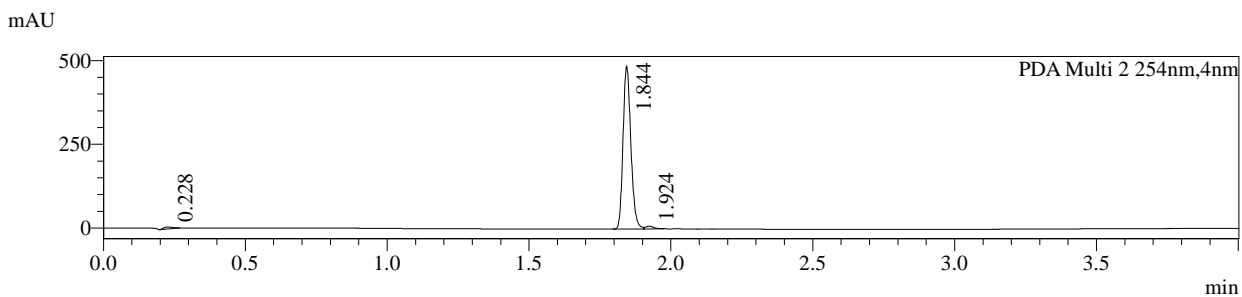

- 1 PDA Multi 1 / 220nm,4nm
- 2 PDA Multi 2 / 254nm,4nm

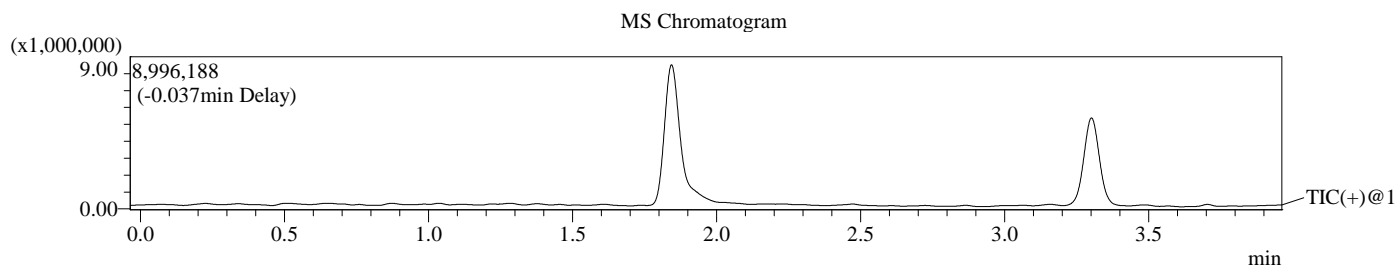


---

### Integration Result

---

#### Peak Table

| PDA Ch1 220nm |           |         |         |           |         |        |  |
|---------------|-----------|---------|---------|-----------|---------|--------|--|
| Peak#         | Ret. Time | Height  | Height% | USP Width | Area    | Area%  |  |
| 1             | 0.184     | 9699    | 0.690   | 0.032     | 10678   | 0.403  |  |
| 2             | 1.844     | 1375569 | 97.835  | 0.051     | 2597828 | 97.933 |  |
| 3             | 1.924     | 20735   | 1.475   | 0.070     | 44150   | 1.664  |  |

#### Peak Table

| PDA Ch2 254nm |           |        |         |           |        |        |  |
|---------------|-----------|--------|---------|-----------|--------|--------|--|
| Peak#         | Ret. Time | Height | Height% | USP Width | Area   | Area%  |  |
| 1             | 0.228     | 5550   | 1.109   | 0.061     | 12693  | 1.323  |  |
| 2             | 1.844     | 487147 | 97.318  | 0.051     | 930916 | 97.064 |  |
| 3             | 1.924     | 7877   | 1.574   | 0.066     | 15464  | 1.612  |  |

Operator: \_\_\_\_\_

Date: \_\_\_\_\_

Mass Spectrum  
RefTime: 1.843 DateFile: D:\DATA\1903\190319\EW17394-6-P1B.lcd

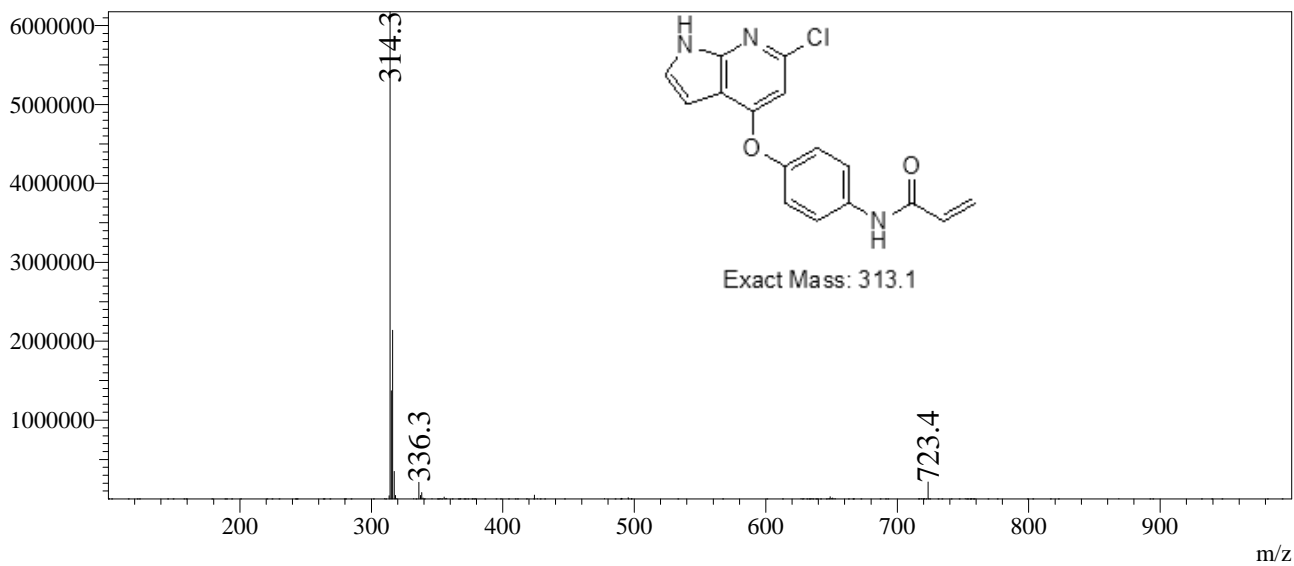

RefTime: 1.923 DateFile: D:\DATA\1903\190319\EW17394-6-P1B.lcd

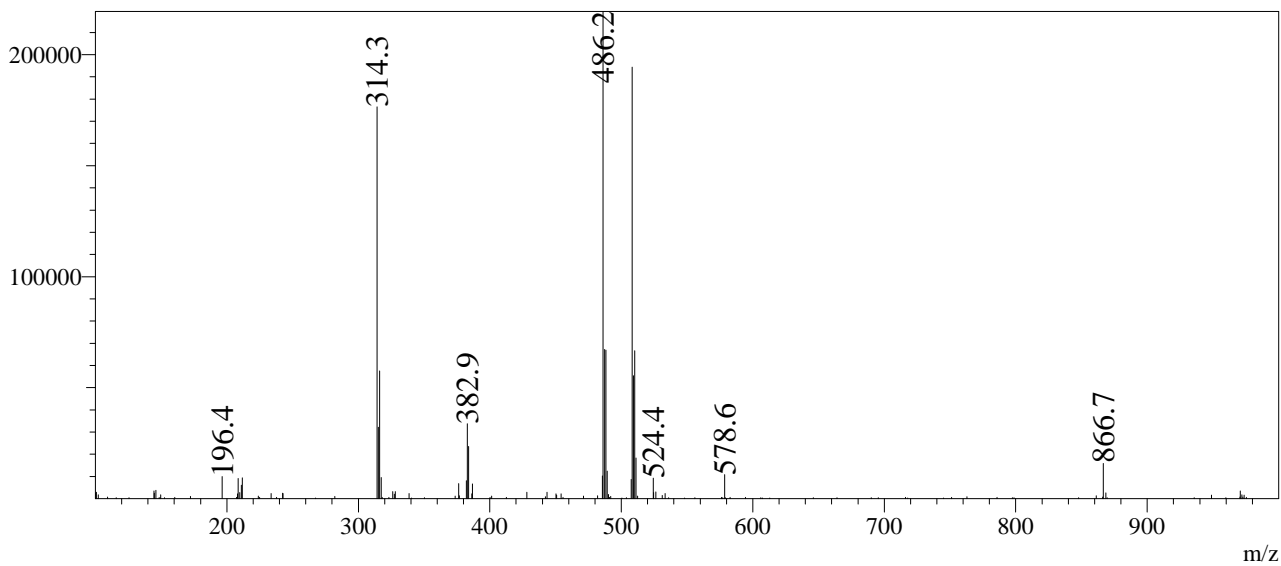



Compound ID: GK-D8

EW17394-7-P1C DMSO Bruker\_H\_400MHz

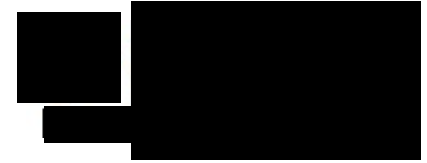

11.979  
11.926

10.518

7.804  
7.781  
7.392  
7.384  
7.377  
7.260  
7.237  
6.814  
6.795  
6.775  
6.555  
6.517  
6.346  
6.212  
6.207  
6.204

4.006  
3.995  
3.469  
3.165  
3.152

2.500

1.252  
1.234  
1.216

Supervisor: Rongfeng Zhao

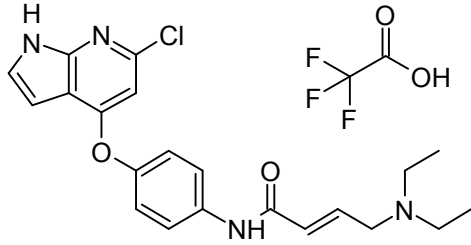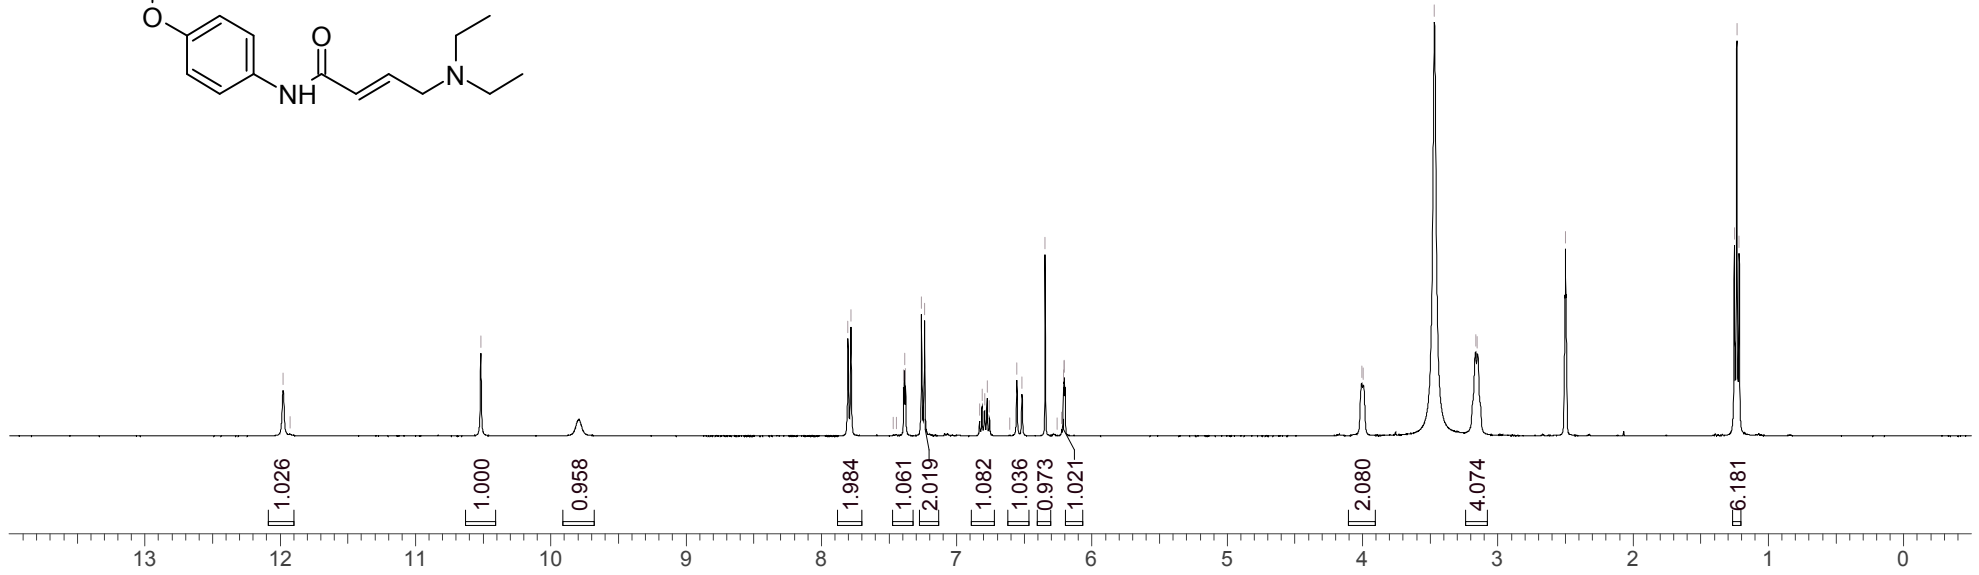

Operator:

Date:

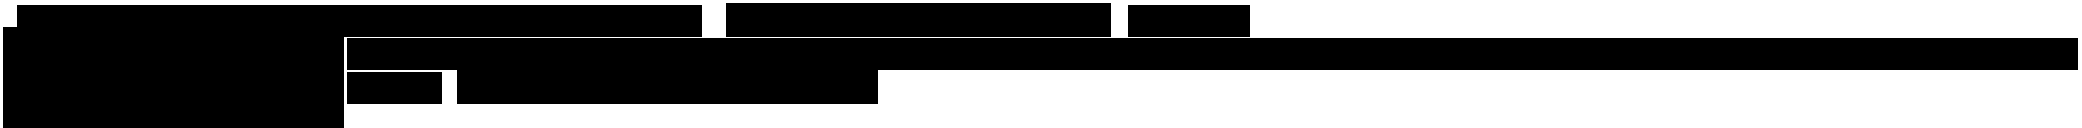

# LCMS REPORT

---

Compound ID : GK-D8  
 Sample ID : EW17394-7-P1C  
 Injection Vol : 0.5ul  
 Location : vial35  
 Acq Method : d:\method\5-95AB\_4min\_220&254.lcm  
 Org DataFile : D:\DATA\1903\190319\EW17394-7-P1C.lcd  
 Injection Date : 2019-03-19 20:55:22  
 Instrument : LCMS-I

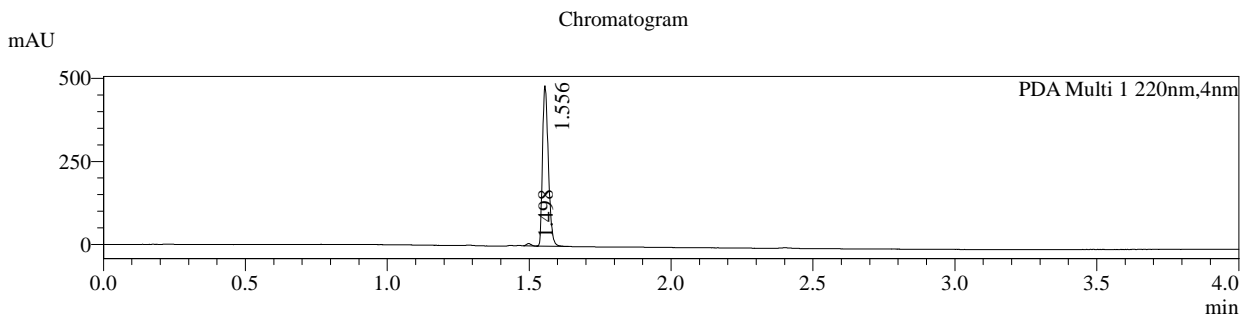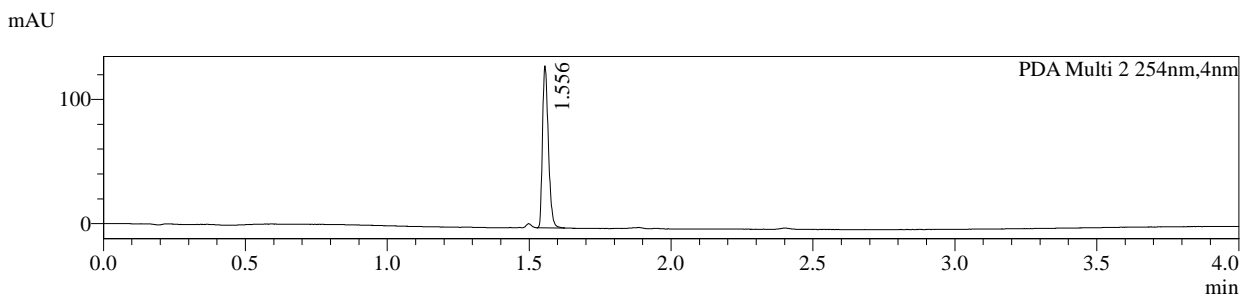

- 1 PDA Multi 1 / 220nm,4nm
- 2 PDA Multi 2 / 254nm,4nm

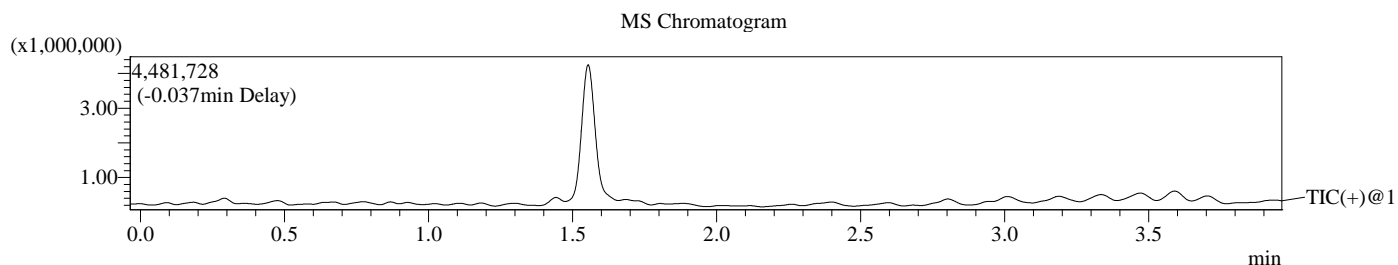


---

### Integration Result

---

#### Peak Table

| PDA Ch1 220nm |           |        |         |           |        |        |  |
|---------------|-----------|--------|---------|-----------|--------|--------|--|
| Peak#         | Ret. Time | Height | Height% | USP Width | Area   | Area%  |  |
| 1             | 1.498     | 6973   | 1.420   | 0.034     | 8261   | 1.177  |  |
| 2             | 1.556     | 484123 | 98.580  | 0.039     | 693731 | 98.823 |  |

#### Peak Table

| PDA Ch2 254nm |           |        |         |           |        |         |  |
|---------------|-----------|--------|---------|-----------|--------|---------|--|
| Peak#         | Ret. Time | Height | Height% | USP Width | Area   | Area%   |  |
| 1             | 1.556     | 130342 | 100.000 | 0.039     | 186824 | 100.000 |  |

Operator: \_\_\_\_\_

Date: \_\_\_\_\_

Mass Spectrum  
RefTime: 1.498 DateFile: D:\DATA\1903\190319\EW17394-7-PIC.lcd

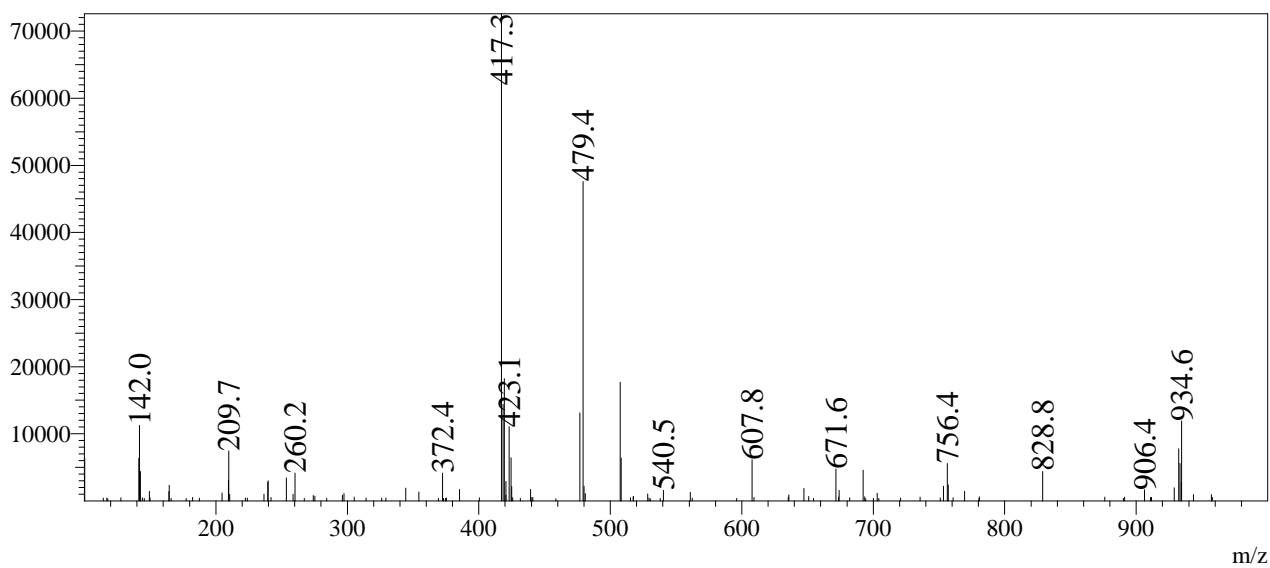

RefTime: 1.555 DateFile: D:\DATA\1903\190319\EW17394-7-PIC.lcd

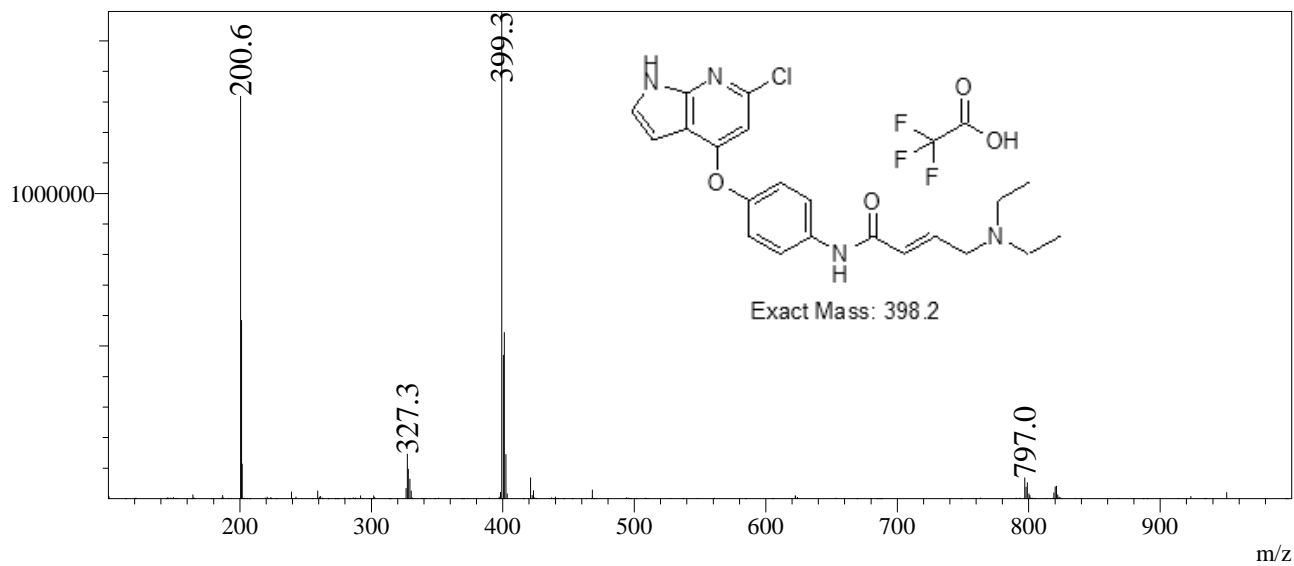

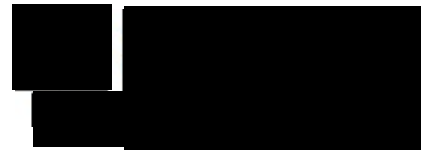

Compound ID: GK-D9

EW17394-26-P1A DMSO Bruker\_B\_400MHz

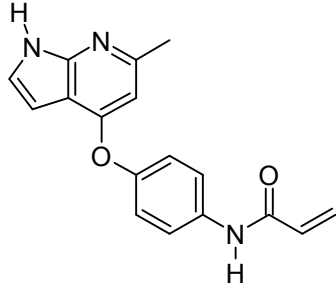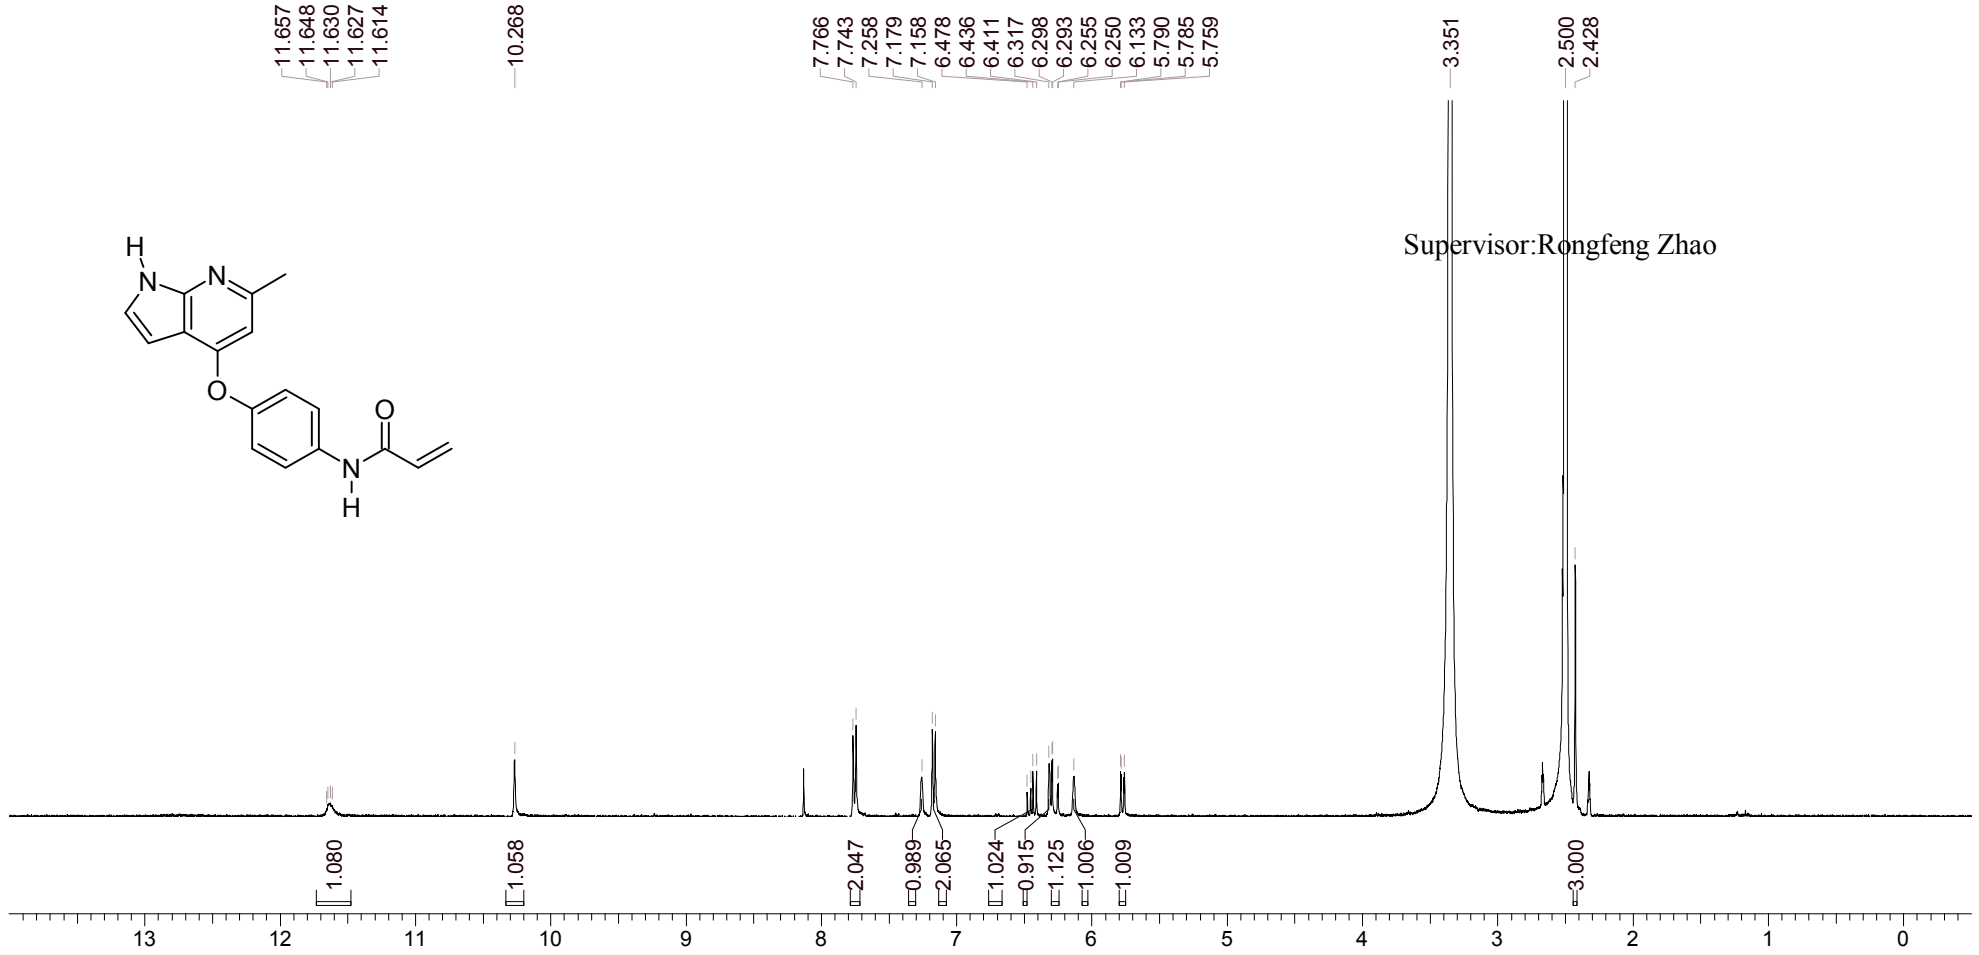

Supervisor: Rongfeng Zhao

Date:

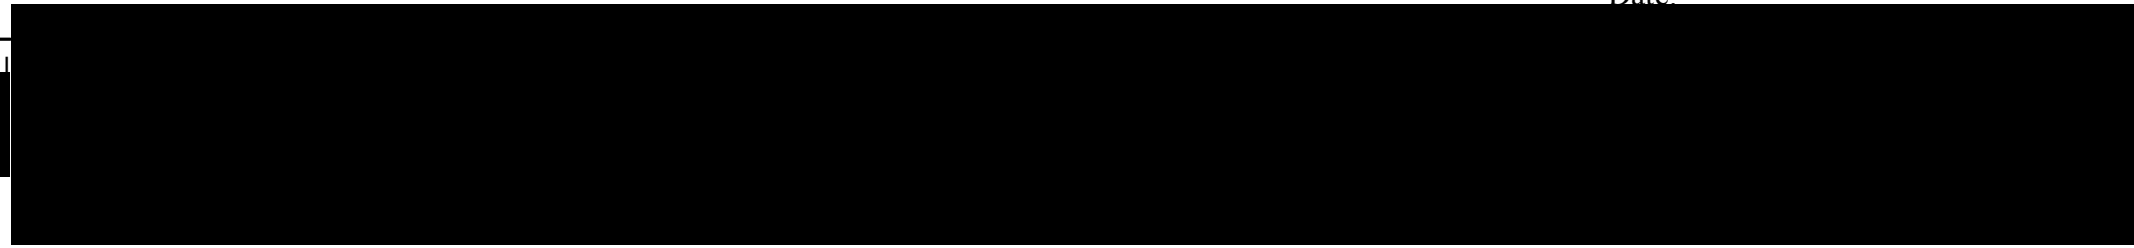

# LCMS REPORT

Compound ID : GK-D9  
 Sample ID : EW17394-26-P1A2  
 Injection Vol : 0.2ul  
 Location : vial8  
 Acq Method : d:\method\5-95AB\_4min\_220&254.lcm  
 Org DataFile : D:\DATA\1904\190403\EW17394-26-P1A2.lcd  
 Injection Date : 4/3/2019 7:12:48 PM  
 Instrument : LCMS-I

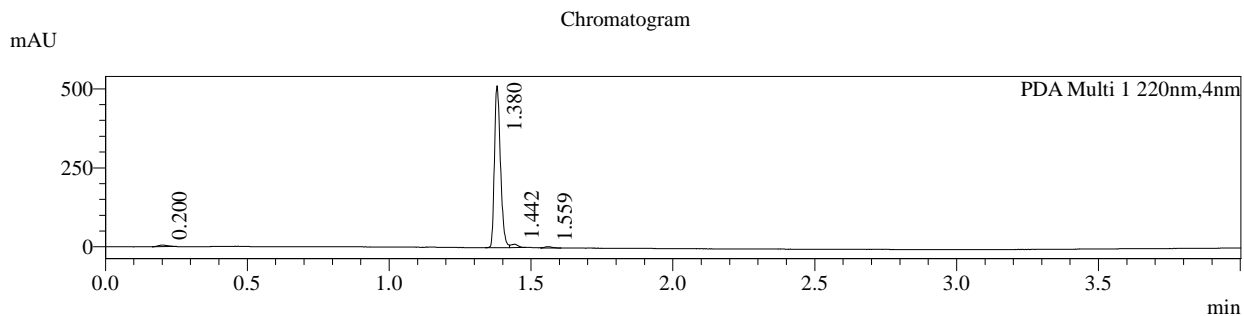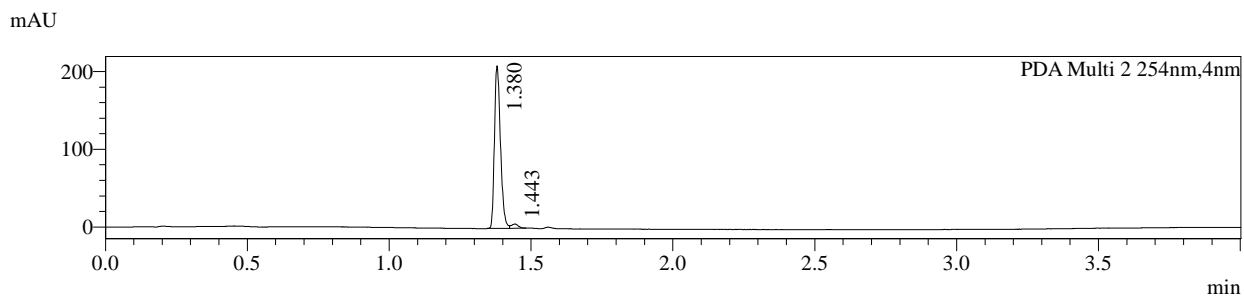

- 1 PDA Multi 1 / 220nm,4nm
- 2 PDA Multi 2 / 254nm,4nm

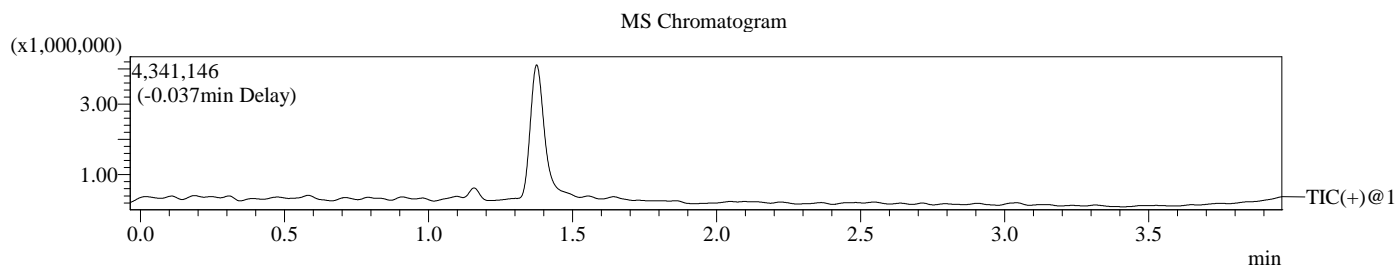

## Integration Result

### Peak Table

| PDA Ch1 220nm |           |        |         |           |        |        |  |
|---------------|-----------|--------|---------|-----------|--------|--------|--|
| Peak#         | Ret. Time | Height | Height% | USP Width | Area   | Area%  |  |
| 1             | 0.200     | 4942   | 0.929   | 0.068     | 11887  | 1.501  |  |
| 2             | 1.380     | 512379 | 96.341  | 0.040     | 754588 | 95.292 |  |
| 3             | 1.442     | 10378  | 1.951   | 0.078     | 18578  | 2.346  |  |
| 4             | 1.559     | 4141   | 0.779   | 0.046     | 6817   | 0.861  |  |

### Peak Table

| PDA Ch2 254nm |           |        |         |           |        |        |  |
|---------------|-----------|--------|---------|-----------|--------|--------|--|
| Peak#         | Ret. Time | Height | Height% | USP Width | Area   | Area%  |  |
| 1             | 1.380     | 209188 | 97.487  | 0.040     | 308592 | 97.068 |  |
| 2             | 1.443     | 5392   | 2.513   | 0.059     | 9321   | 2.932  |  |

Operator: \_\_\_\_\_

Date: \_\_\_\_\_

Mass Spectrum  
RefTime: 0.200 DateFile: D:\DATA\1904\190403\EW17394-26-P1A2.lcd

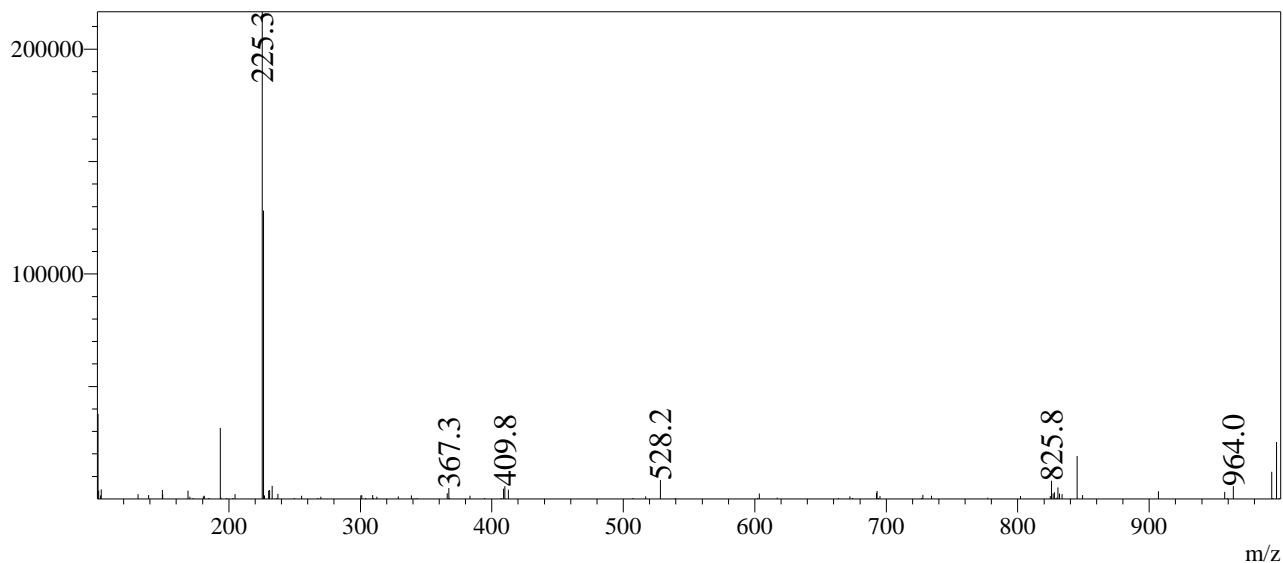

RefTime: 1.380 DateFile: D:\DATA\1904\190403\EW17394-26-P1A2.lcd

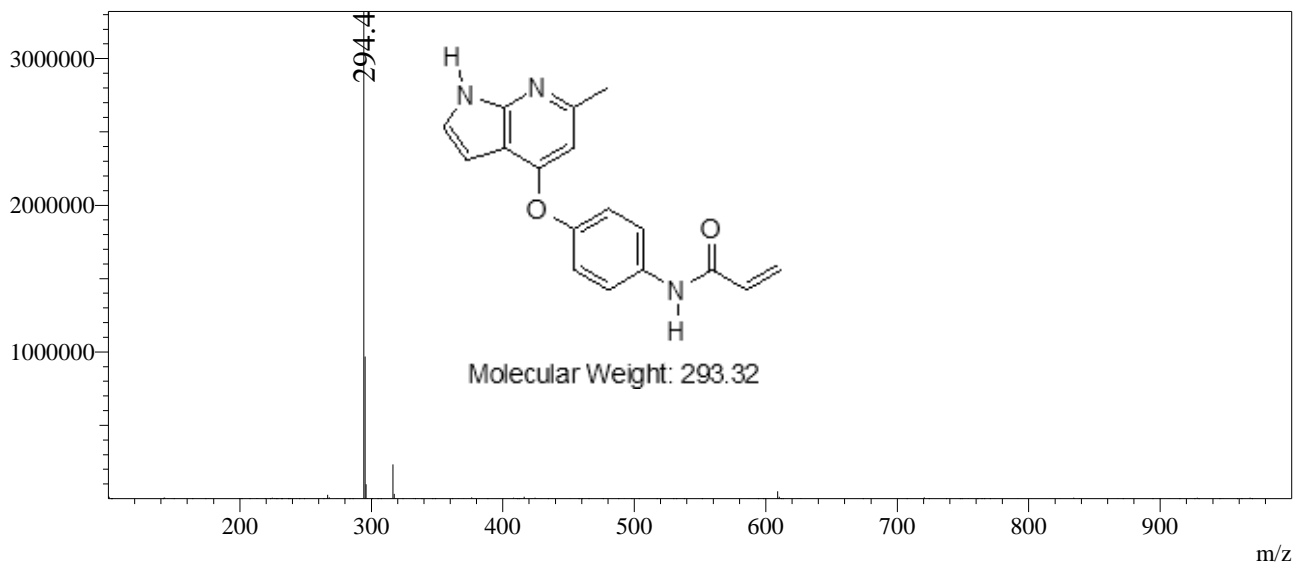

RefTime: 1.442 DateFile: D:\DATA\1904\190403\EW17394-26-P1A2.lcd

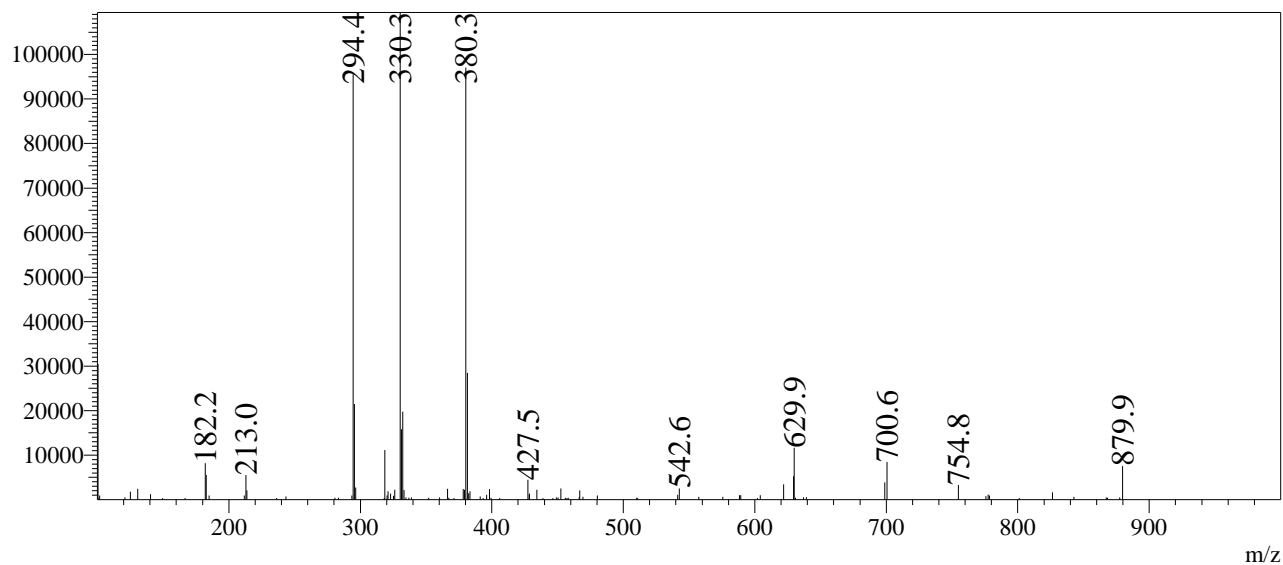



Compound ID: GK-D10

EW17394-27-P1A DMSO Bruker\_F\_400MHz

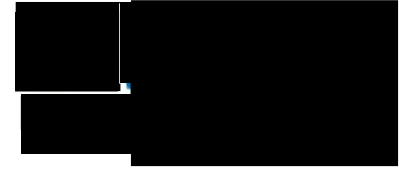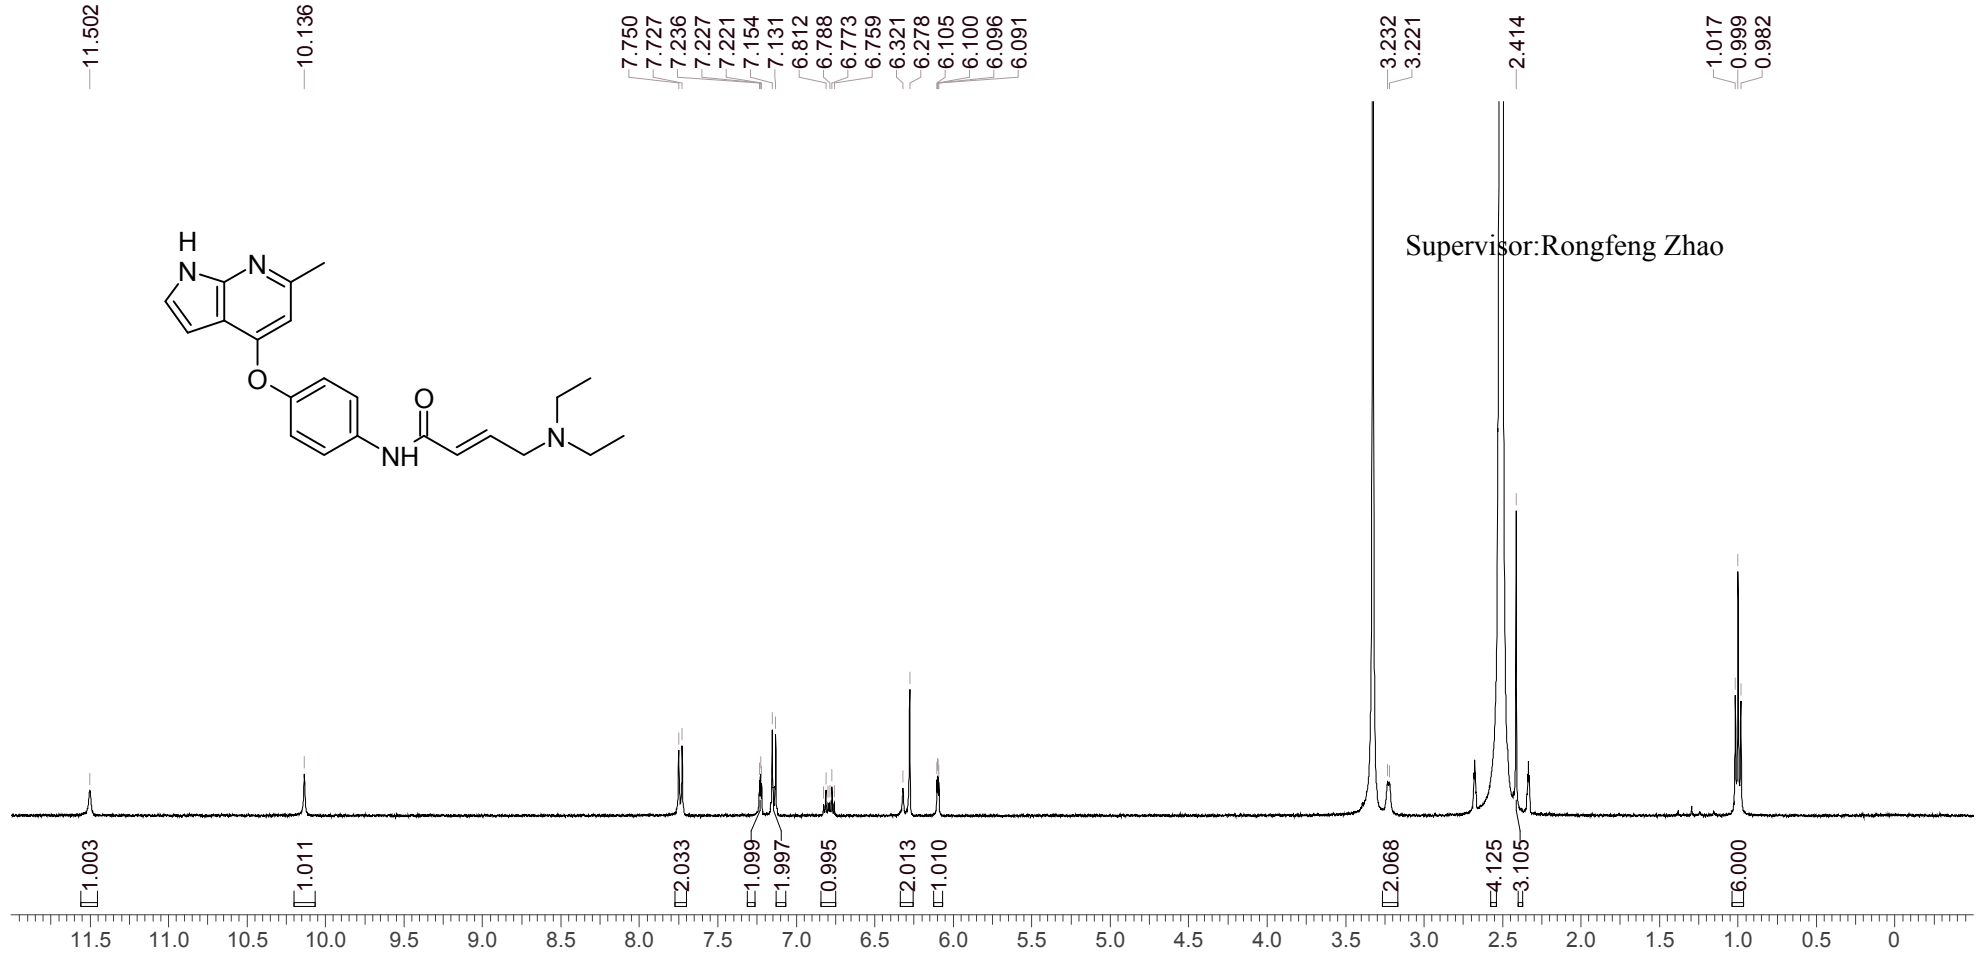

Supervisor: Rongfeng Zhao

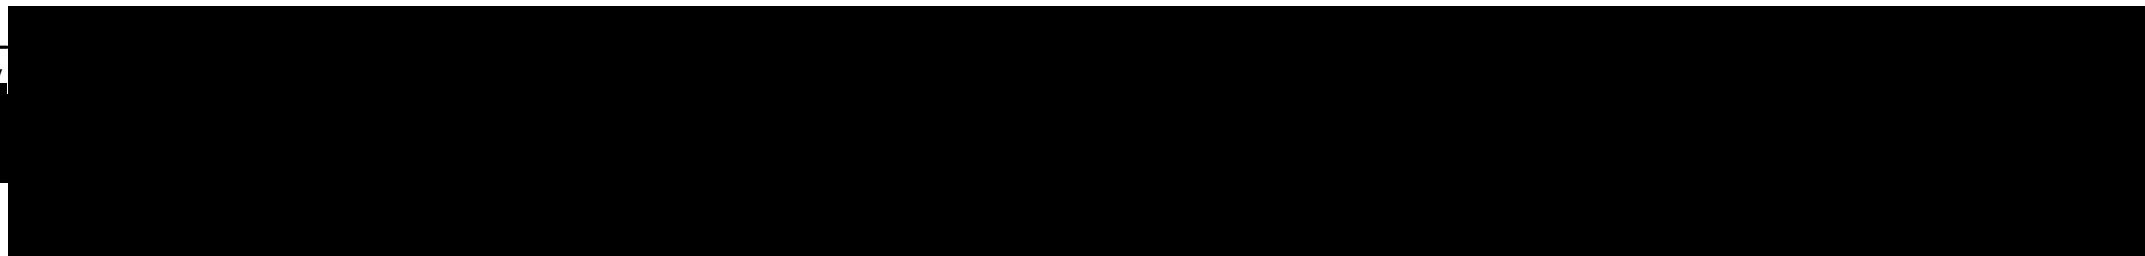

# LCMS REPORT

Compound ID : GK-D10  
 Sample ID : EW17394-27-P1F1  
 Injection Vol : 1ul  
 Location : vial29  
 Acq Method : d:\method\5-95AB\_R\_220&254.lcm  
 Org DataFile : D:\DATA\1904\190404\EW17394-27-P1F1.lcd  
 Injection Date : 4/4/2019 12:17:34 PM  
 Instrument : LCMS-I

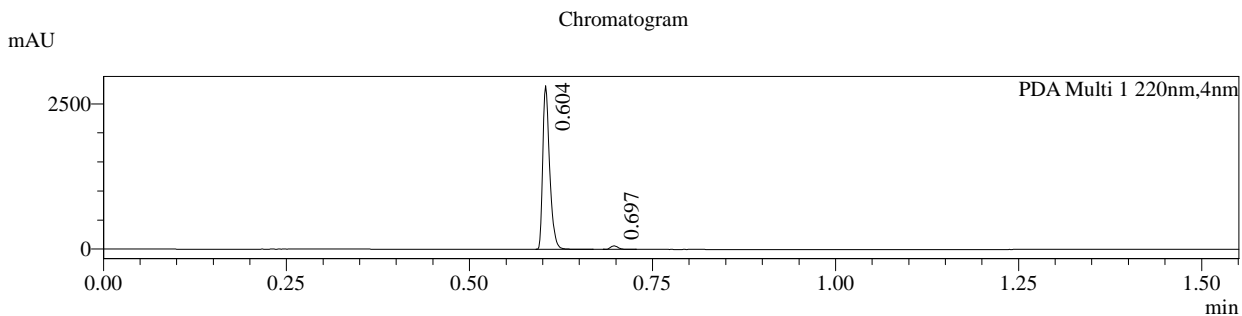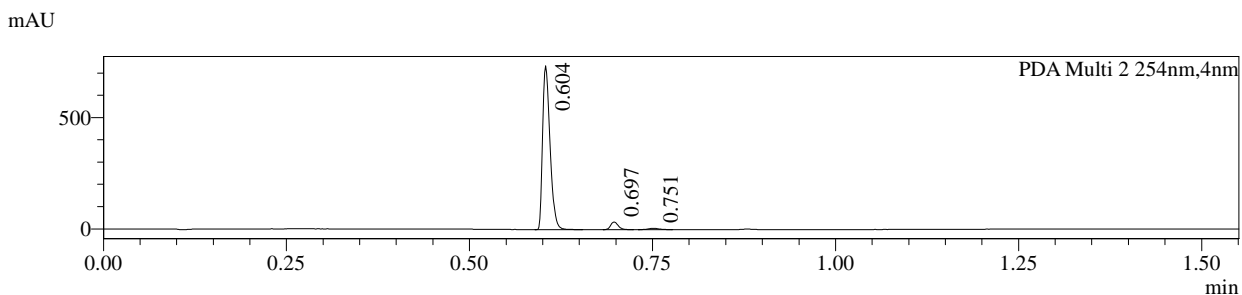

- 1 PDA Multi 1 / 220nm,4nm
- 2 PDA Multi 2 / 254nm,4nm

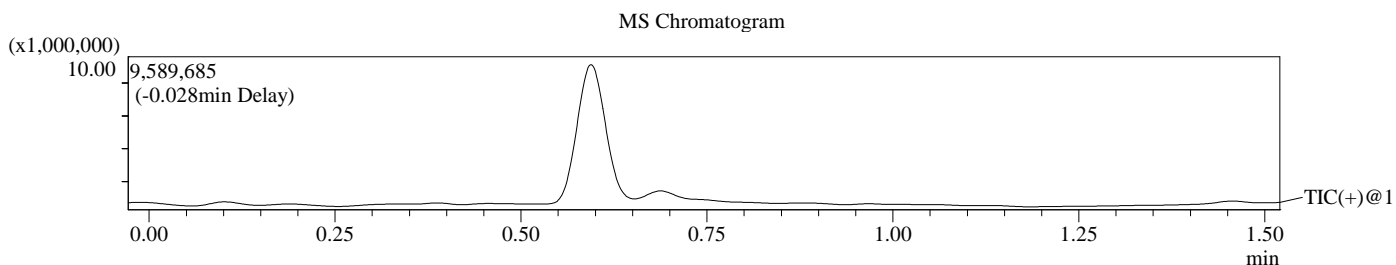

## Integration Result

### Peak Table

| PDA Ch1 220nm |           |         |         |           |         |        |  |
|---------------|-----------|---------|---------|-----------|---------|--------|--|
| Peak#         | Ret. Time | Height  | Height% | USP Width | Area    | Area%  |  |
| 1             | 0.604     | 2815408 | 97.850  | 0.020     | 1859966 | 97.739 |  |
| 2             | 0.697     | 61854   | 2.150   | 0.021     | 43033   | 2.261  |  |

### Peak Table

| PDA Ch2 254nm |           |        |         |           |        |        |  |
|---------------|-----------|--------|---------|-----------|--------|--------|--|
| Peak#         | Ret. Time | Height | Height% | USP Width | Area   | Area%  |  |
| 1             | 0.604     | 735720 | 94.851  | 0.021     | 524278 | 94.620 |  |
| 2             | 0.697     | 34499  | 4.448   | 0.021     | 24017  | 4.334  |  |
| 3             | 0.751     | 5440   | 0.701   | 0.030     | 5793   | 1.046  |  |

Operator: \_\_\_\_\_

Date: \_\_\_\_\_

Mass Spectrum  
RefTime: 0.603 DateFile: D:\DATA\1904\190404\EW17394-27-P1F1.lcd

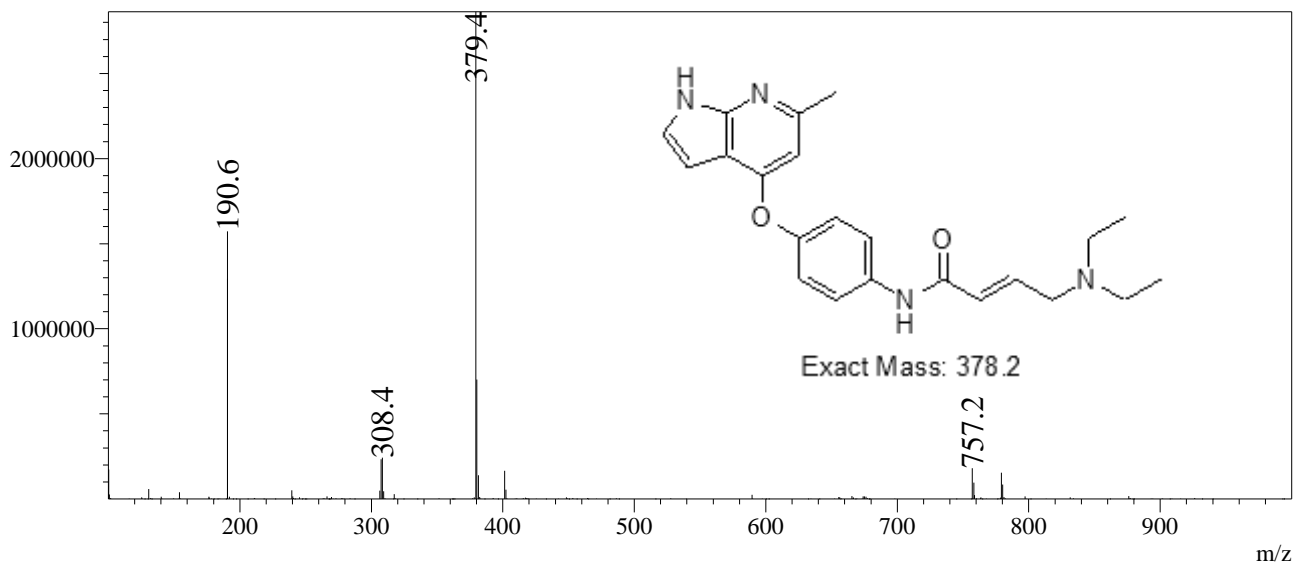

RefTime: 0.697 DateFile: D:\DATA\1904\190404\EW17394-27-P1F1.lcd

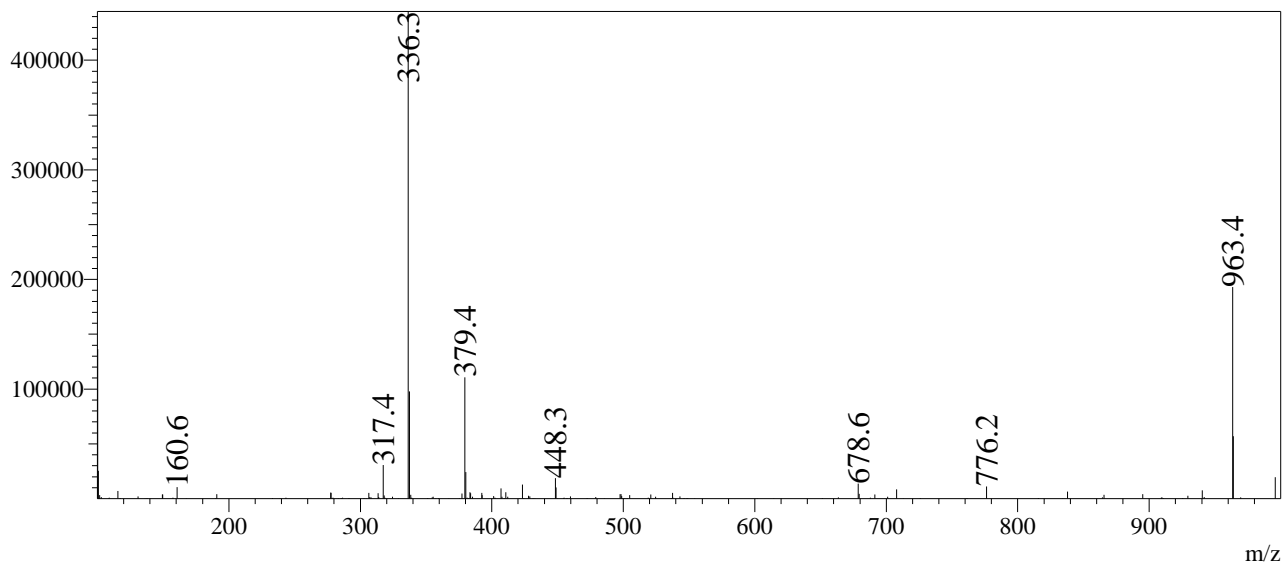

# HPLC REPORT

Compound ID : GK-D10  
 Sample ID : EW17394-27-P1F2  
 Vial# : 58  
 Injection Volumn : 0.5  
 Filename : D:\DATA\2019\1904\190404\EW17394-27-P1F2.lcd  
 Method Name : D:\Method\10-80AB\_4min.lcm  
 Instrument : HPLC-Q  
 Run time : 4/4/2019 2:51:53 PM

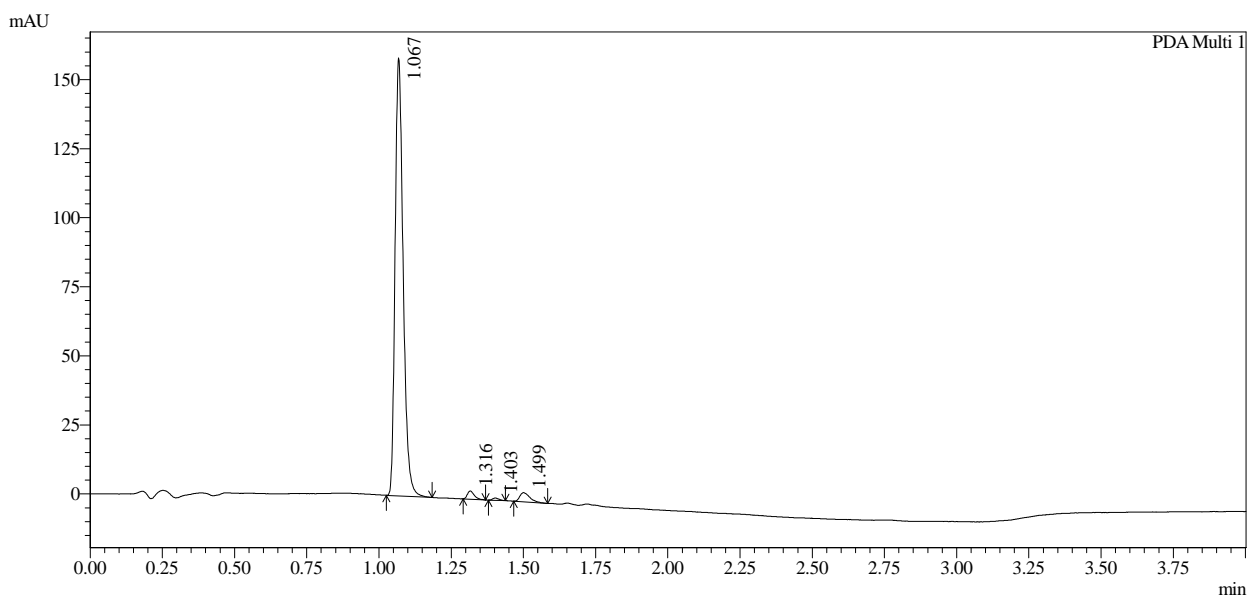

1 PDA Multi 1 / 220nm,4nm

### Integration result

| PeakTable     |       |           |           |            |        |        |         |
|---------------|-------|-----------|-----------|------------|--------|--------|---------|
| PDA Ch1 220nm | Peak# | Ret. Time | USP Width | Resolution | Height | Area   | Area %  |
|               | 1     | 1.067     | 0.051     | 0.000      | 158562 | 306942 | 95.554  |
|               | 2     | 1.316     | 0.044     | 5.221      | 2966   | 4960   | 1.544   |
|               | 3     | 1.403     | 0.044     | 1.972      | 830    | 1233   | 0.384   |
|               | 4     | 1.499     | 0.063     | 1.802      | 3321   | 8089   | 2.518   |
|               | Total |           |           |            | 165678 | 321225 | 100.000 |

Operator : \_\_\_\_\_

Date : \_\_\_\_\_

# HPLC REPORT

Compound ID : GK-D10  
 Sample ID : EW17394-27-P1F2  
 Filename : D:\DATA\2019\1904\190404\EW17394-27-P1F2.lcd  
 Method Name : D:\Method\10-80AB\_4min.lcm  
 Instrument : HPLC-Q  
 Run time : 4/4/2019 2:51:53 PM

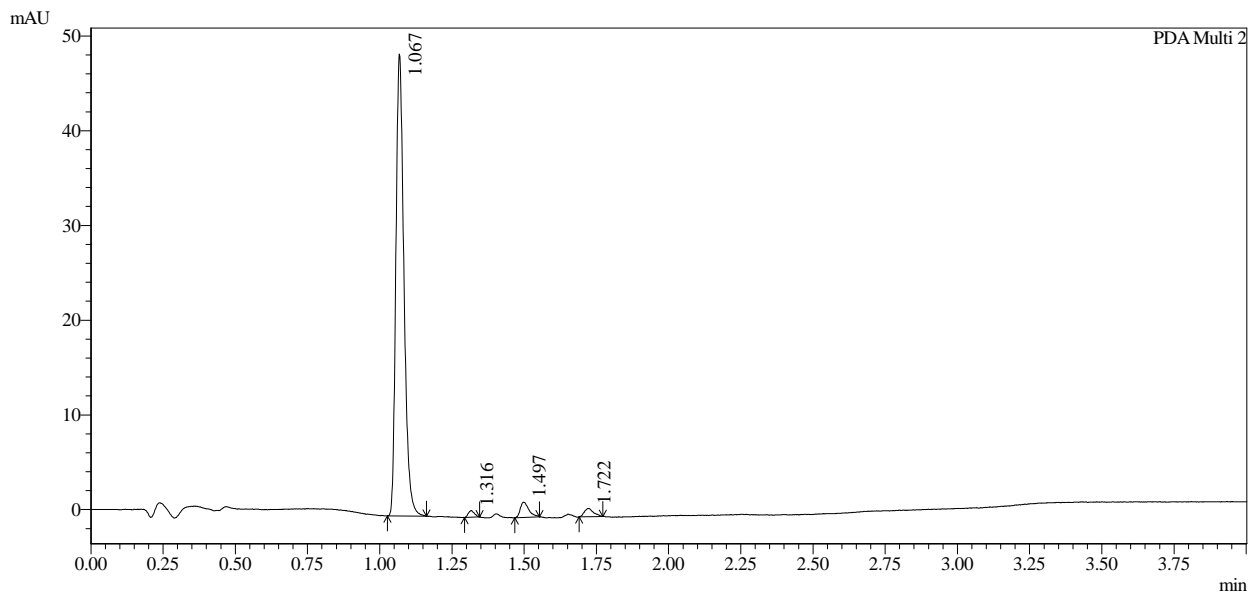

-----  
 Integration result  
 -----

PeakTable

PDA Ch2 254nm

| Peak# | Ret. Time | USP Width | Resolution | Height | Area   | Area %  |
|-------|-----------|-----------|------------|--------|--------|---------|
| 1     | 1.067     | 0.051     | 0.000      | 48755  | 94150  | 93.823  |
| 2     | 1.316     | 0.042     | 5.332      | 704    | 1021   | 1.017   |
| 3     | 1.497     | 0.054     | 3.775      | 1608   | 3317   | 3.306   |
| 4     | 1.722     | 0.057     | 4.061      | 865    | 1861   | 1.854   |
| Total |           |           |            | 51932  | 100349 | 100.000 |

Operator : \_\_\_\_\_

Date : \_\_\_\_\_

# HPLC REPORT

Compound ID : GK-D10  
 Sample ID : EW17394-27-P1F2  
 Filename : D:\DATA\2019\1904\190404\EW17394-27-P1F2.lcd  
 Method Name : D:\Method\10-80AB\_4min.lcm  
 Instrument & Column : HPLC-Q  
 Run time : 4/4/2019 2:51:53 PM

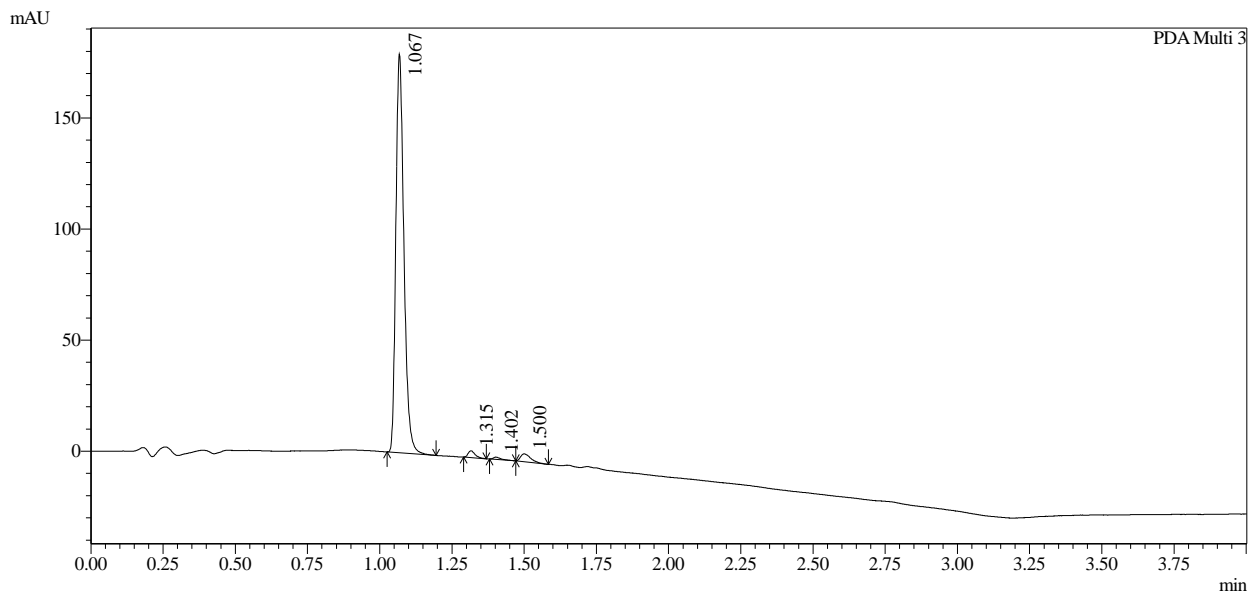

1 PDA Multi 3 / 215nm,4nm

-----  
 Integration result  
 -----

PeakTable

PDA Ch3 215nm

| Peak# | Ret. Time | USP Width | Resolution | Height | Area   | Area %  |
|-------|-----------|-----------|------------|--------|--------|---------|
| 1     | 1.067     | 0.051     | 0.000      | 179506 | 347287 | 95.691  |
| 2     | 1.315     | 0.045     | 5.157      | 3063   | 5158   | 1.421   |
| 3     | 1.402     | 0.046     | 1.906      | 1026   | 1731   | 0.477   |
| 4     | 1.500     | 0.064     | 1.781      | 3563   | 8750   | 2.411   |
| Total |           |           |            | 187158 | 362926 | 100.000 |

Operator : \_\_\_\_\_

Date : \_\_\_\_\_

Compound ID: GK-PD1b

EW20854-35-P1A DMSO Bruker\_E\_400MHz

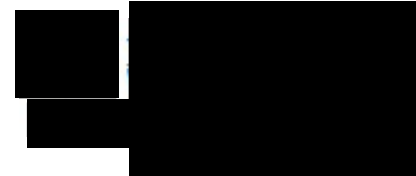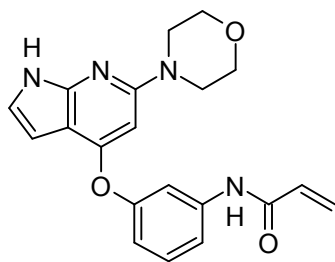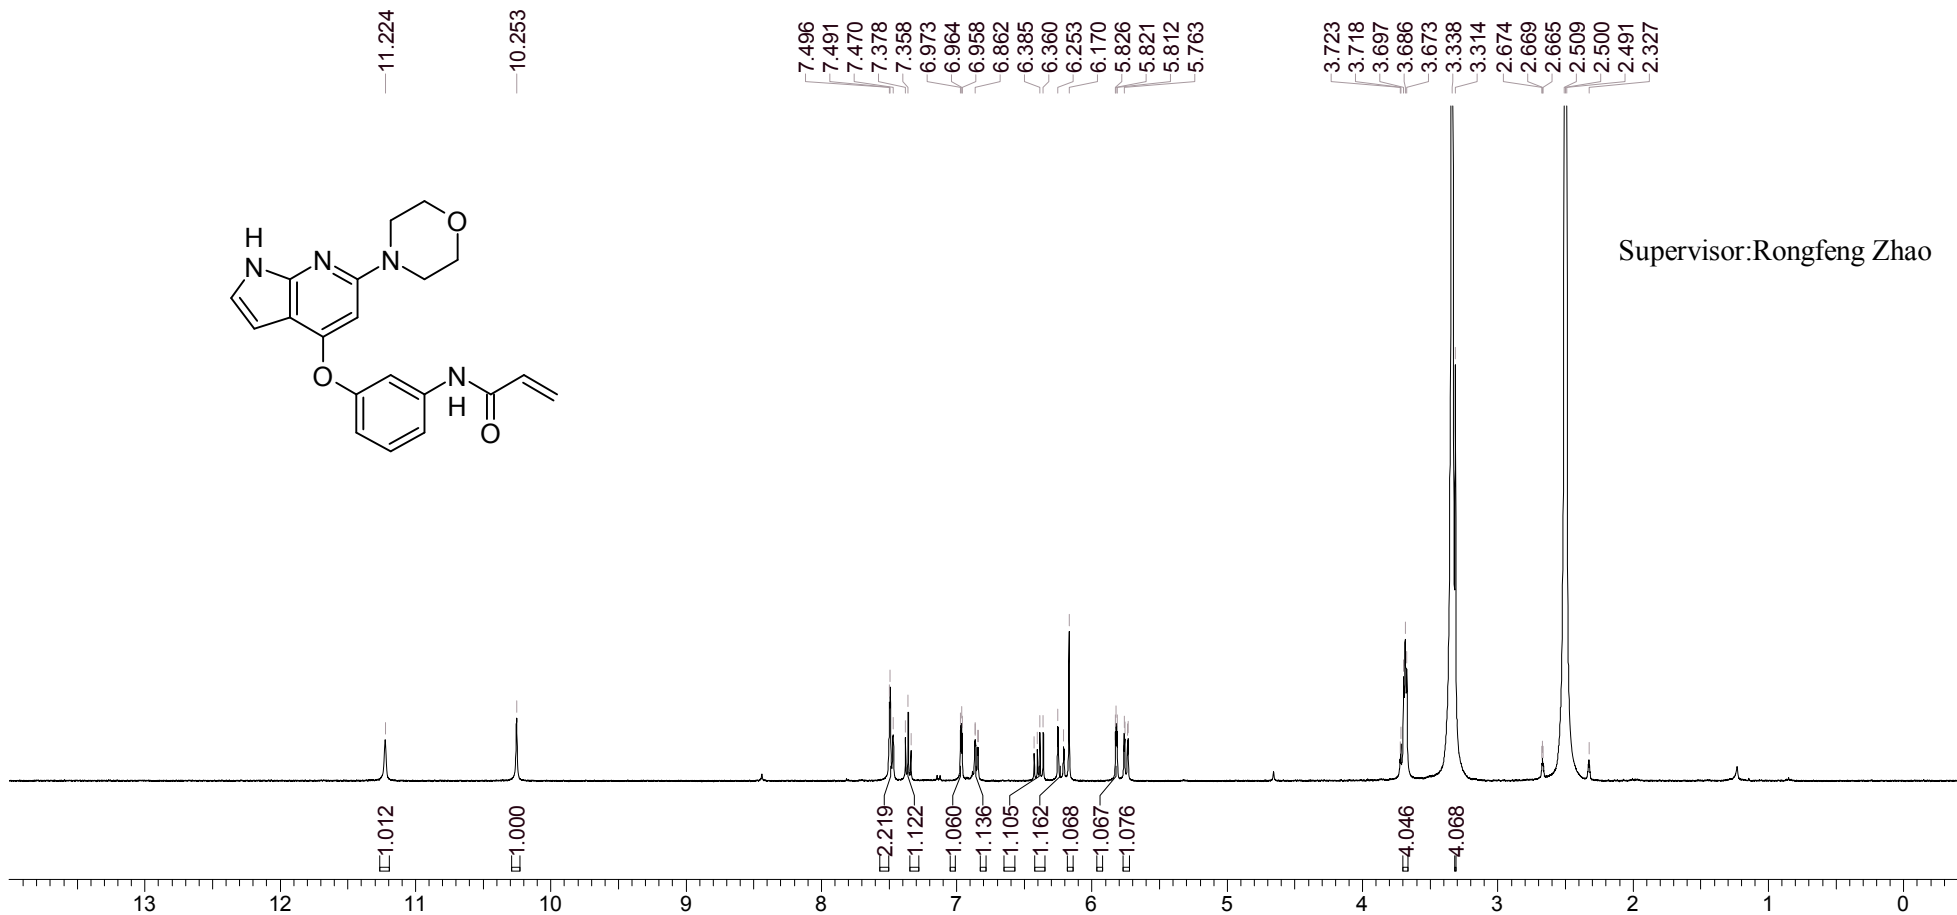

Supervisor: Rongfeng Zhao

Operator:

Date:

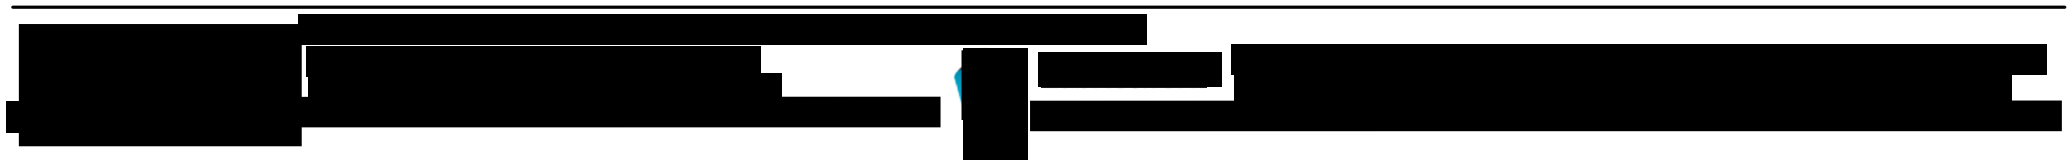



LCMS REPORT

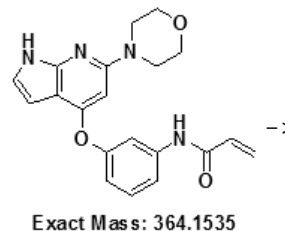

Compound ID : GK-PD1b  
 Sample ID : EW20854-35-P1E  
 Injection Date : Thu, 31. Oct. 2019 15:20:11  
 Location : P2-F-07  
 Inj. Vol. : 4.00 uL  
 Acq Method : D:\METHODS\WUXIAB10.M  
 Data Filename : D:\2019\201910\191031LCMS-F1\EW20854-35-P1E.D  
 Instrument : CAS-WH-LCMS-F

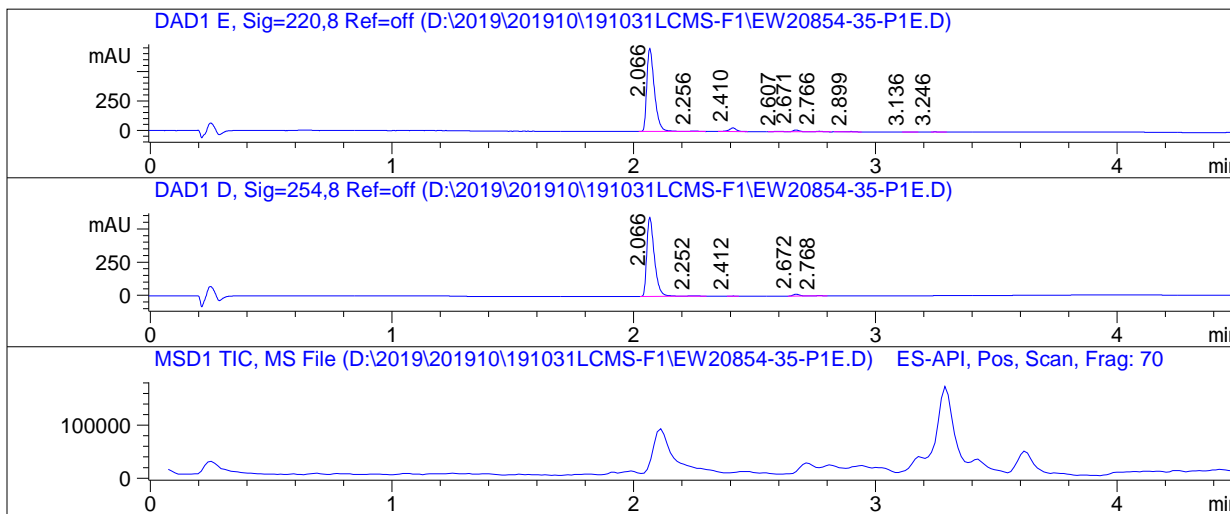

Report

=====

Signal 1 : DAD1 E, Sig=220,8 Ref=off

| # | Meas. Ret. | Height  | Width | Area      | Area % |
|---|------------|---------|-------|-----------|--------|
| 1 | 2.066      | 705.127 | 0.036 | 1530.8291 | 91.86  |
| 2 | 2.256      | 4.331   | 0.048 | 12.4430   | 0.75   |
| 3 | 2.410      | 31.301  | 0.035 | 66.2521   | 3.98   |
| 4 | 2.607      | 3.239   | 0.039 | 7.5003    | 0.45   |
| 5 | 2.671      | 15.111  | 0.029 | 26.1020   | 1.57   |
| 6 | 2.766      | 5.076   | 0.029 | 8.7604    | 0.53   |
| 7 | 2.899      | 3.270   | 0.036 | 7.0901    | 0.43   |
| 8 | 3.136      | 1.453   | 0.041 | 3.5342    | 0.21   |
| 9 | 3.246      | 2.422   | 0.027 | 3.9693    | 0.24   |

Signal 2 : DAD1 D, Sig=254,8 Ref=off

| # | Meas. Ret. | Height  | Width | Area      | Area % |
|---|------------|---------|-------|-----------|--------|
| 1 | 2.066      | 594.990 | 0.036 | 1288.8213 | 96.64  |
| 2 | 2.252      | 3.686   | 0.053 | 11.7700   | 0.88   |
| 3 | 2.412      | 0.973   | 0.024 | 1.4118    | 0.11   |
| 4 | 2.672      | 14.440  | 0.030 | 25.8134   | 1.94   |
| 5 | 2.768      | 3.248   | 0.030 | 5.7657    | 0.43   |

Operator: \_\_\_\_\_

Date: \_\_\_\_\_

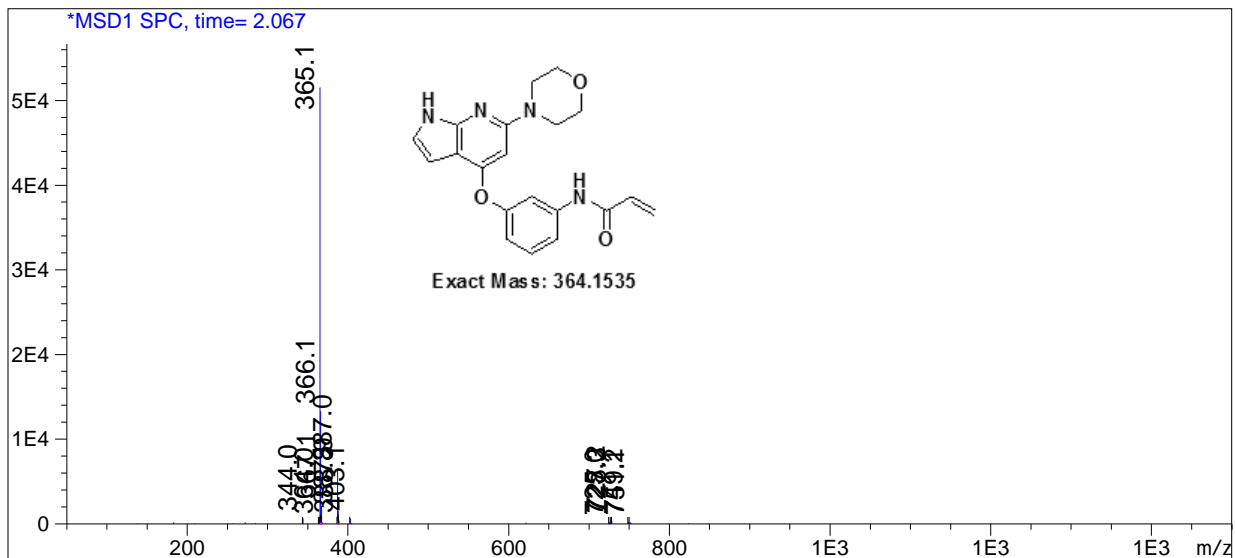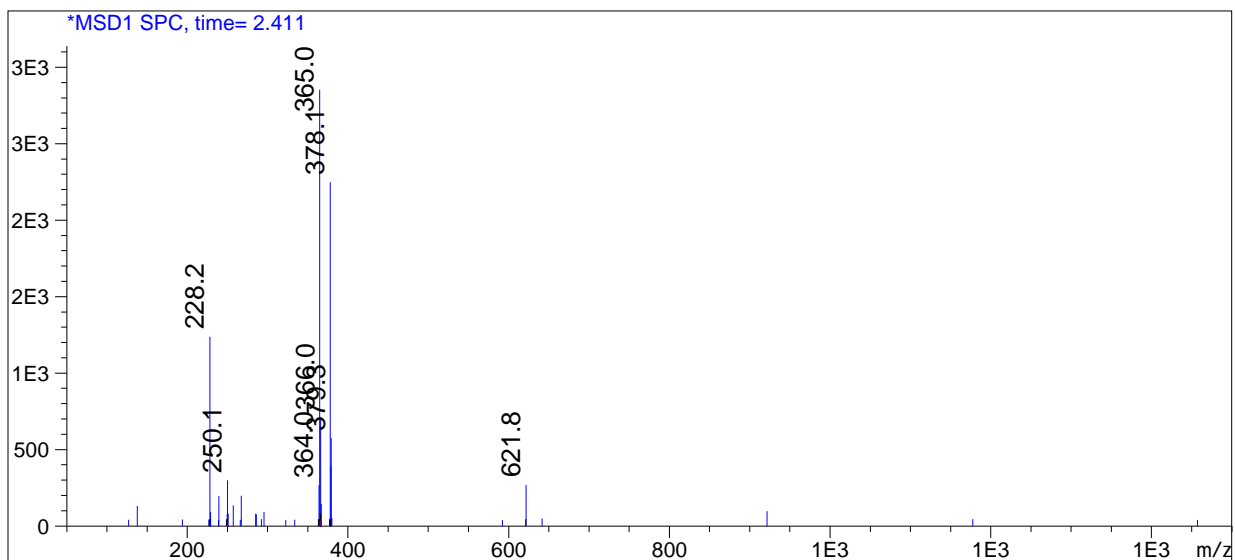

Compound ID: GK-PD1b1

EW20854-57-P1B DMSO Bruker\_E\_400MHz

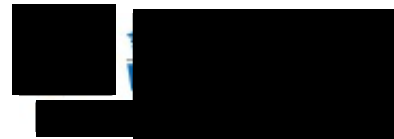

11.151

10.227

7.484  
7.480  
7.465  
7.375  
7.354  
6.922  
6.916  
6.914  
6.908  
6.378  
6.352  
6.254  
6.249  
6.170  
5.781  
5.776  
5.773  
5.763  
4.669  
4.659  
4.654  
4.630  
3.929  
3.919  
3.909  
3.896  
3.886  
3.652  
3.335  
3.030  
3.023  
2.997  
2.972  
2.965  
2.522  
2.509  
2.500  
2.495  
1.778  
1.770  
1.756  
1.746  
1.738  
1.375  
1.367  
1.343  
1.233  
0.851

Supervisor: Rongfeng Zhao

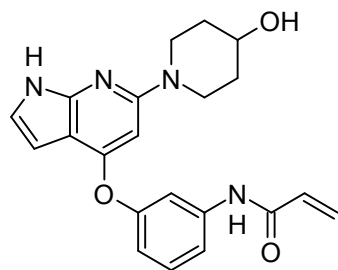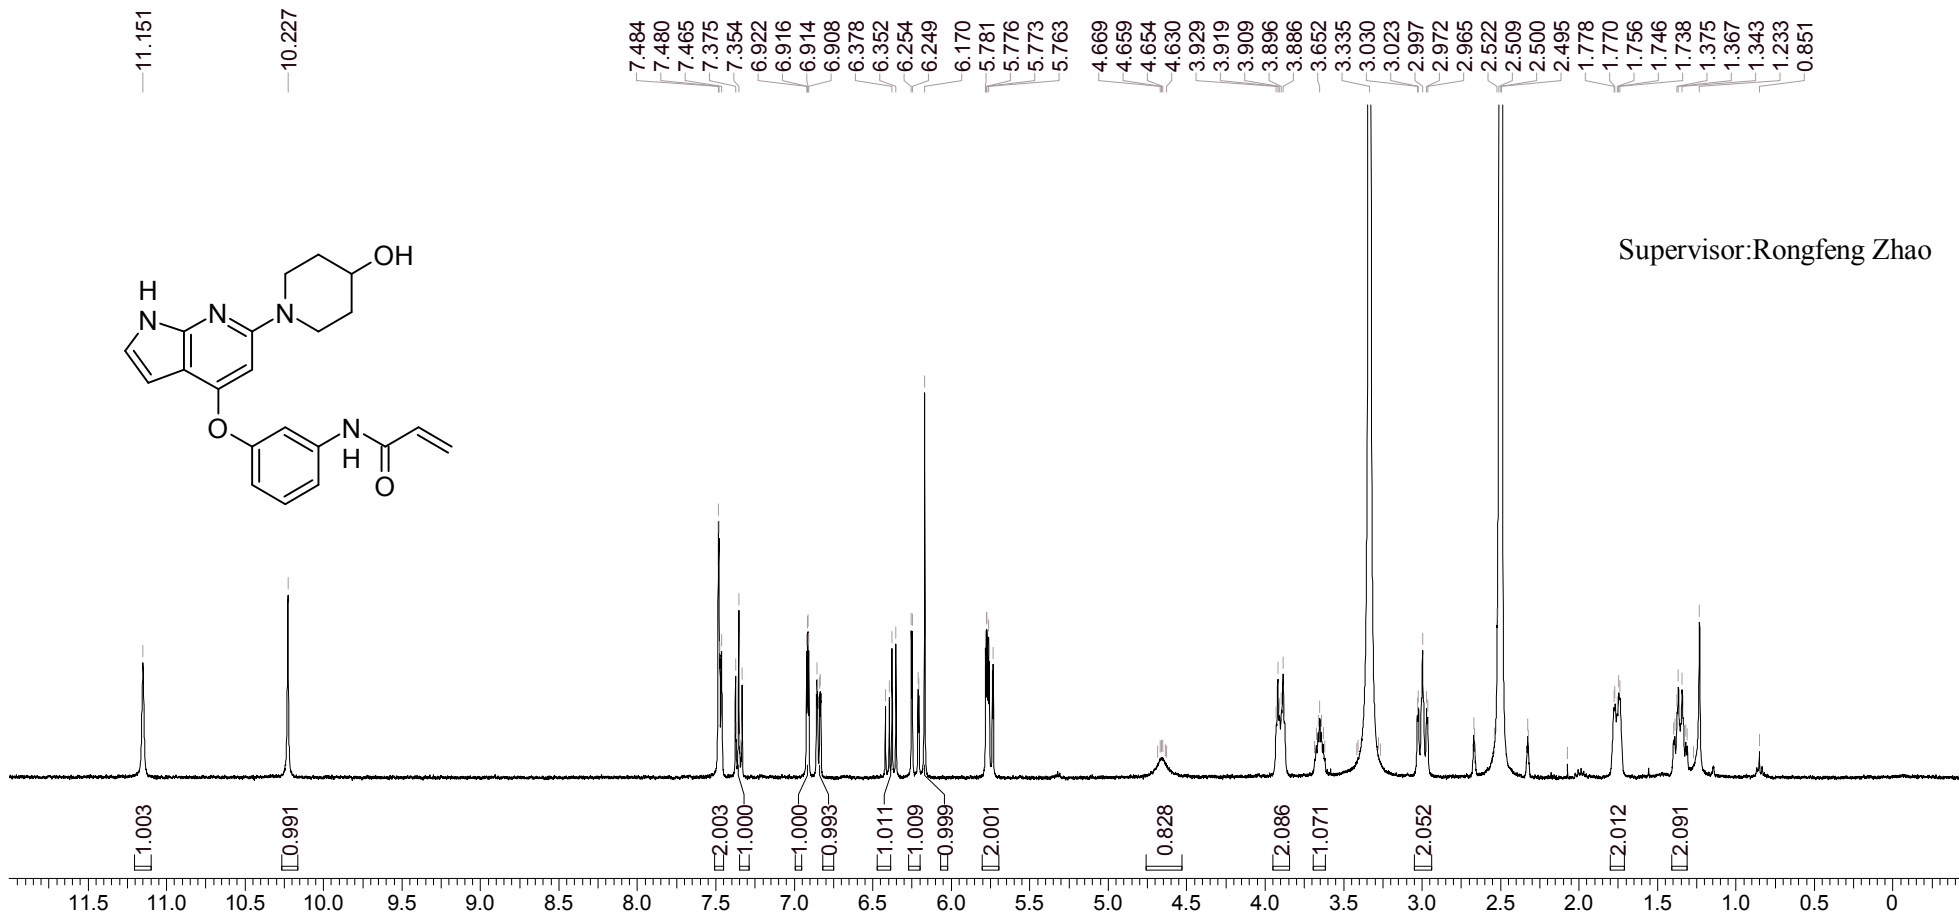

Operator:

Date:

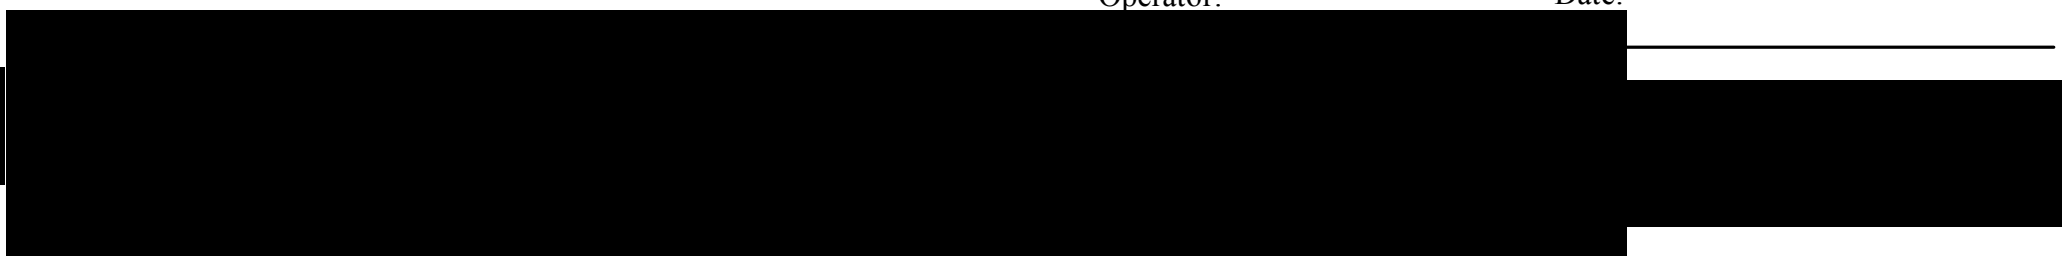

# LCMS REPORT

Compound ID : GK-PD1b1  
 Sample ID : EW20854-57-P1G  
 Injection Vol : 7ul  
 Location : vial24  
 Acq Method : D:\method\5-95CD\_R\_220&254\_POS.lcm  
 Org DataFile : D:\DATA\2019\1912\191212\EW20854-57-P1G.lcd  
 Injection Date : 2019-12-12 11:52:55  
 Instrument : LCMS-M 17-102

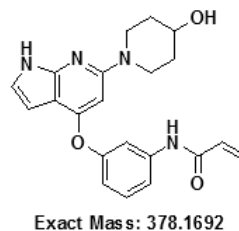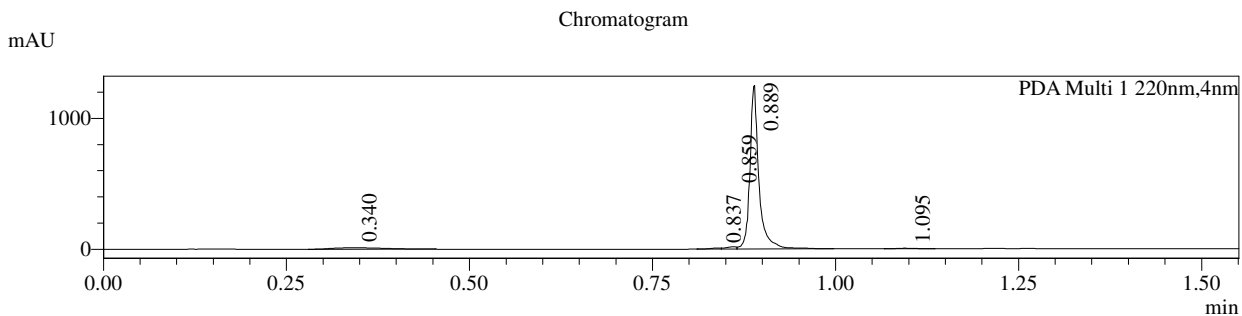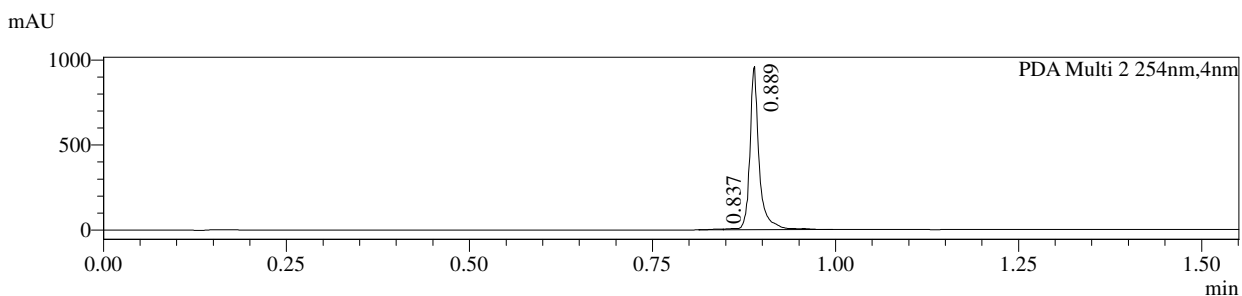

- 1 PDA Multi 1 / 220nm,4nm
- 2 PDA Multi 2 / 254nm,4nm

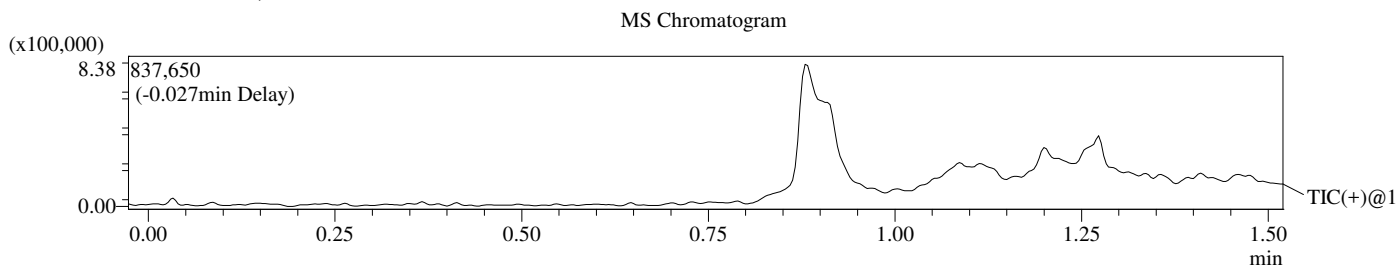

## Integration Result

### Peak Table

PDA Ch1 220nm

| Peak# | Ret. Time | Height  | Height% | USP Width | Area    | Area%  |
|-------|-----------|---------|---------|-----------|---------|--------|
| 1     | 0.340     | 10996   | 0.853   | 0.131     | 55314   | 4.753  |
| 2     | 0.837     | 7685    | 0.596   | 0.000     | 8010    | 0.688  |
| 3     | 0.859     | 16586   | 1.286   | 0.105     | 17018   | 1.462  |
| 4     | 0.889     | 1249605 | 96.912  | 0.054     | 1075761 | 92.437 |
| 5     | 1.095     | 4553    | 0.353   | 0.047     | 7673    | 0.659  |

### Peak Table

PDA Ch2 254nm

| Peak# | Ret. Time | Height | Height% | USP Width | Area   | Area%  |
|-------|-----------|--------|---------|-----------|--------|--------|
| 1     | 0.837     | 4891   | 0.506   | 0.084     | 5342   | 0.623  |
| 2     | 0.889     | 960947 | 99.494  | 0.022     | 852660 | 99.377 |

Operator: \_\_\_\_\_

Date: \_\_\_\_\_

Mass Spectrum  
RefTime: 0.340 Datafile: D:\DATA\2019\1912\191212\EW20854-57-P1G.lcd

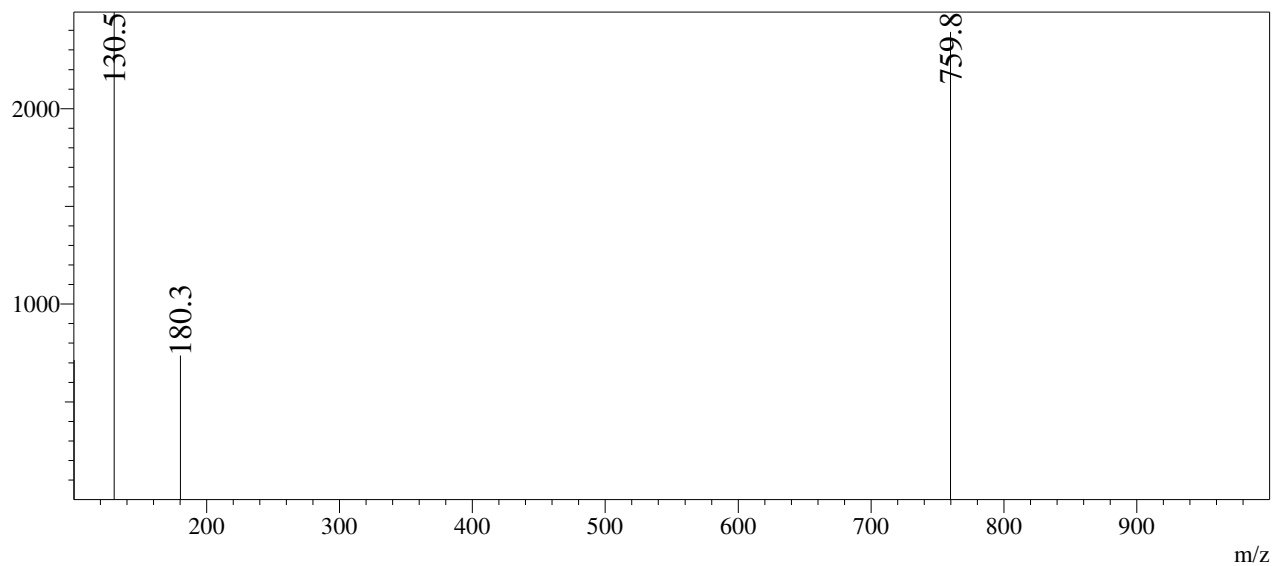

RefTime: 0.836 Datafile: D:\DATA\2019\1912\191212\EW20854-57-P1G.lcd

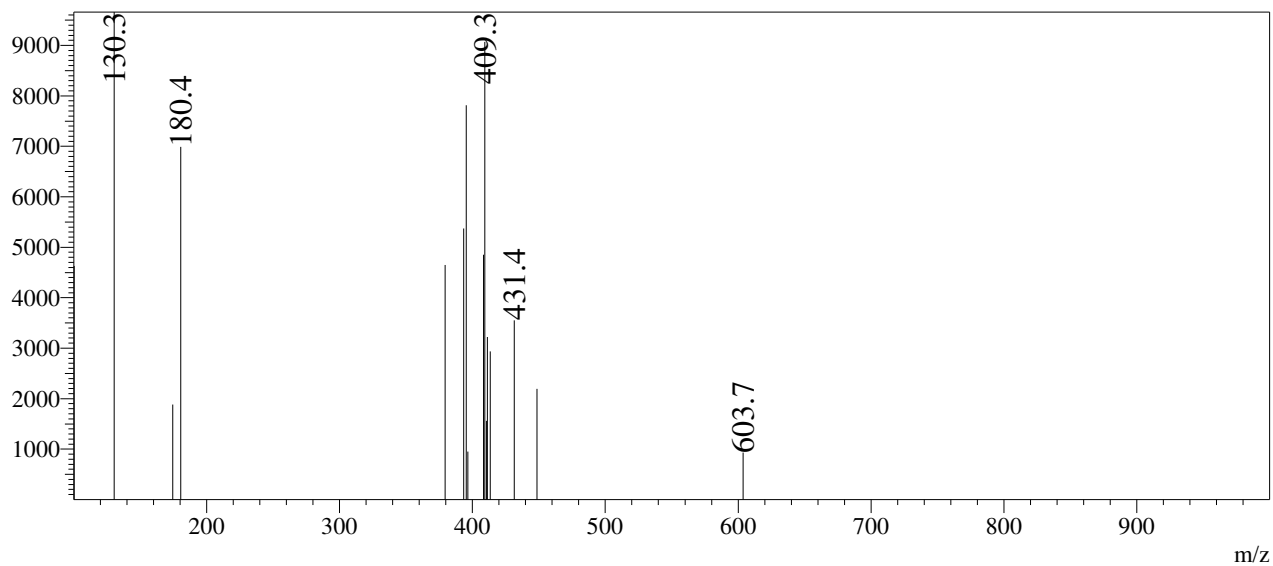

RefTime: 0.860 Datafile: D:\DATA\2019\1912\191212\EW20854-57-P1G.lcd

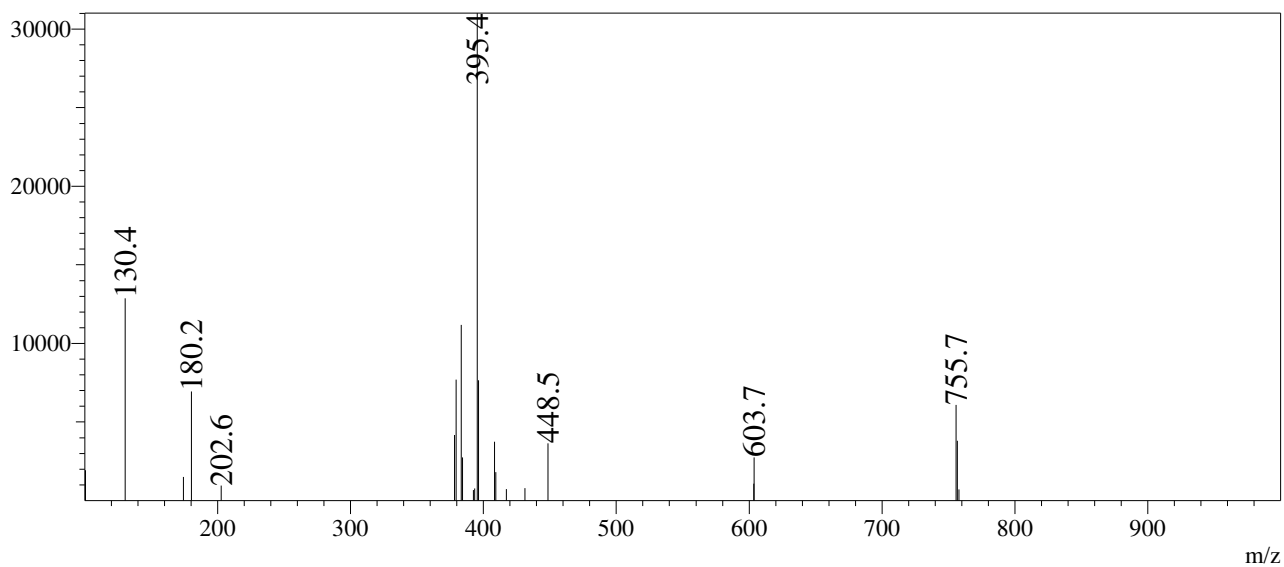

RefTime: 0.890 Datafile: D:\DATA\2019\1912\191212\EW20854-57-P1G.lcd

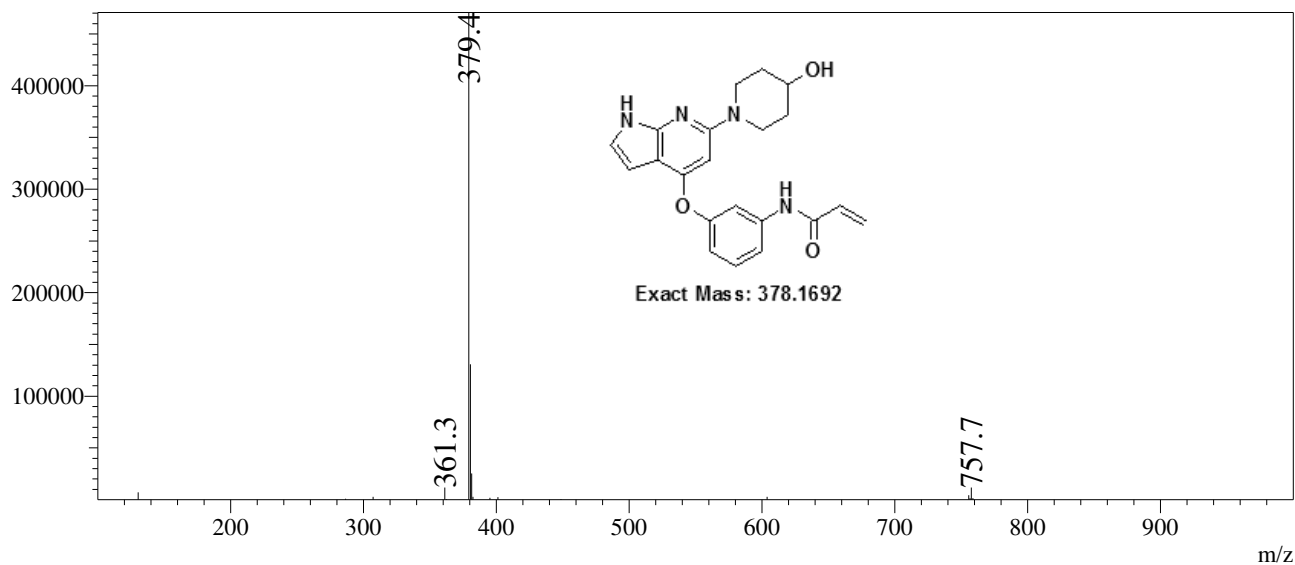

RefTime: 1.096 Datafile: D:\DATA\2019\1912\191212\EW20854-57-P1G.lcd

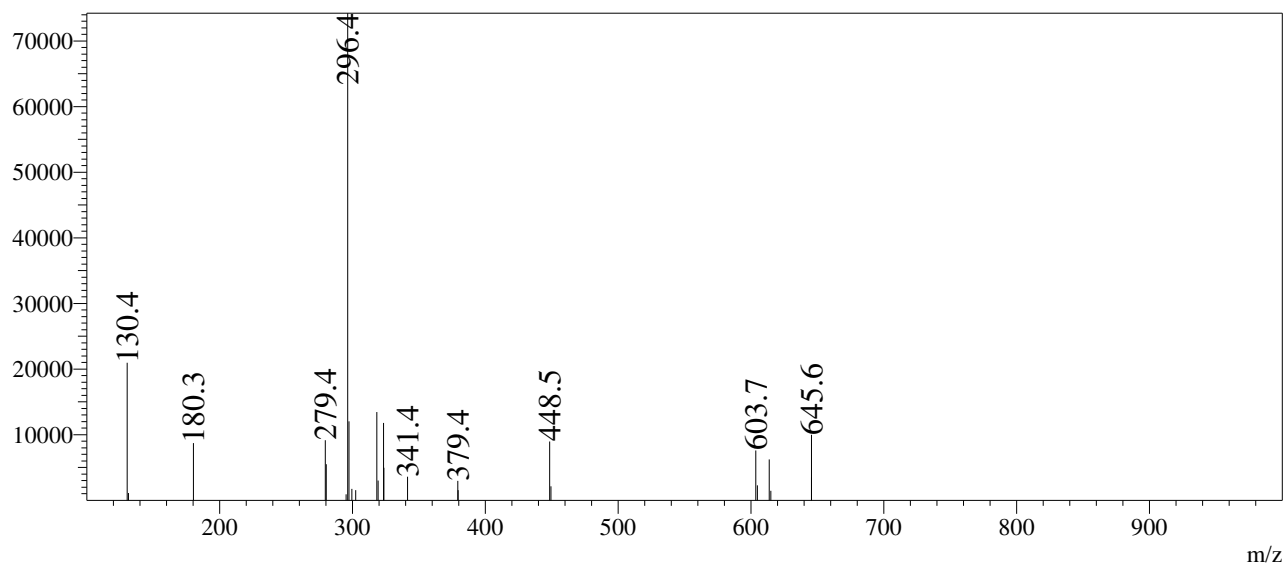

# HPLC REPORT

Compound ID : GK-PD1b1  
 Sample ID : EW20854-57-P11  
 Vial# : 86  
 Injection Volumn : 7  
 Filename : D:\DATA\2019\1912\191212\EW20854-57-P11.lcd  
 Method Name : D:\method\10-80AB\_4min.lcm  
 Instrument : HPLC-R  
 Run time : 2019-12-12 17:30:21

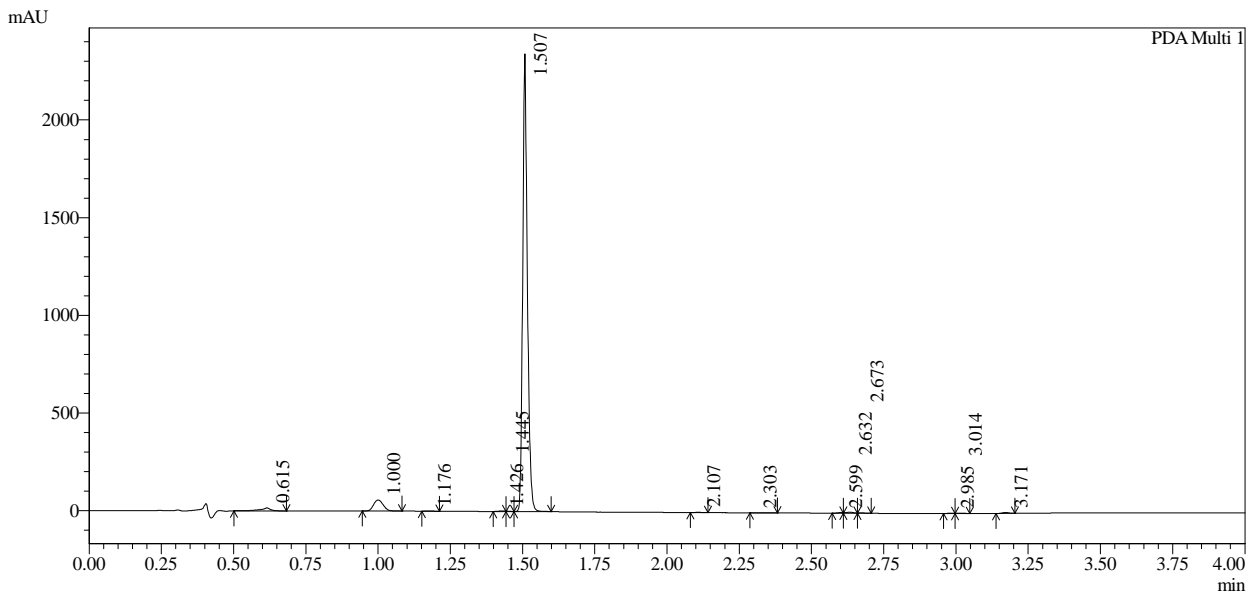

Integration result

PeakTable

PDA Ch1 220nm

| Peak# | Ret. Time | USP Width | Resolution | Height  | Area    | Area %  |
|-------|-----------|-----------|------------|---------|---------|---------|
| 1     | 0.615     | 0.047     | 0.000      | 15547   | 39312   | 1.386   |
| 2     | 1.000     | 0.062     | 7.093      | 56262   | 131324  | 4.631   |
| 3     | 1.176     | 0.043     | 3.354      | 1192    | 1853    | 0.065   |
| 4     | 1.426     | 0.048     | 5.488      | 3209    | 4408    | 0.155   |
| 5     | 1.445     | 0.164     | 0.186      | 2171    | 1736    | 0.061   |
| 6     | 1.507     | 0.032     | 0.633      | 2342783 | 2625204 | 92.571  |
| 7     | 2.107     | 0.041     | 16.477     | 1570    | 2309    | 0.081   |
| 8     | 2.303     | 0.074     | 3.400      | 446     | 1556    | 0.055   |
| 9     | 2.599     | 0.068     | 4.179      | 2787    | 3702    | 0.131   |
| 10    | 2.632     | 0.054     | 0.531      | 5179    | 9449    | 0.333   |
| 11    | 2.673     | 0.046     | 0.809      | 2057    | 2921    | 0.103   |
| 12    | 2.985     | 0.049     | 6.613      | 1159    | 1592    | 0.056   |
| 13    | 3.014     | 0.048     | 0.580      | 1633    | 2589    | 0.091   |
| 14    | 3.171     | 0.043     | 3.435      | 5066    | 7930    | 0.280   |
| Total |           |           |            | 2441063 | 2835885 | 100.000 |

Operator : \_\_\_\_\_



Date : \_\_\_\_\_

# HPLC REPORT

Compound ID : GK-PD1b1  
 Sample ID : EW20854-57-P1I  
 Filename : D:\DATA\2019\1912\191212\EW20854-57-P1I.lcd  
 Method Name : D:\method\10-80AB\_4min.lcm  
 Instrument & Column : HPLC-R  
 Run time : 2019-12-12 17:30:21

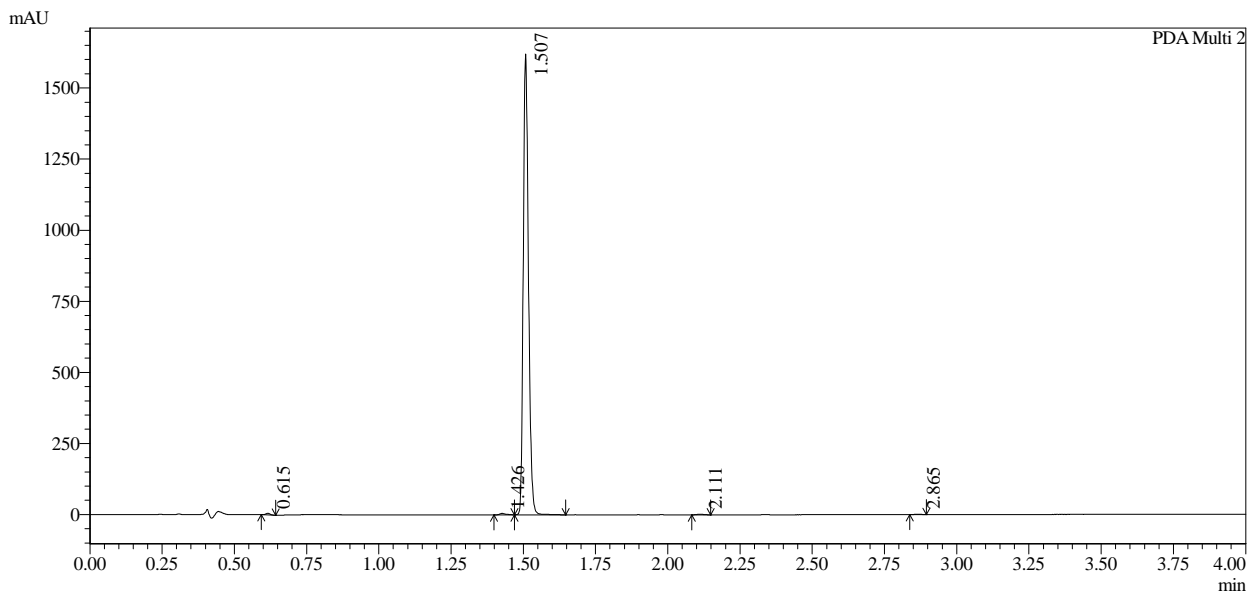

-----  
 Integration result  
 -----

PeakTable

PDA Ch2 254nm

| Peak# | Ret. Time | USP Width | Resolution | Height  | Area    | Area %  |         |
|-------|-----------|-----------|------------|---------|---------|---------|---------|
| 1     | 0.615     | 0.028     | 0.000      | 5763    | 5654    | 0.275   |         |
| 2     | 1.426     | 0.039     | 24.324     | 5018    | 7755    | 0.377   |         |
| 3     | 1.507     | 0.035     | 2.214      | 1620614 | 2036801 | 99.068  |         |
| 4     | 2.111     | 0.040     | 16.221     | 2219    | 3154    | 0.153   |         |
| 5     | 2.865     | 0.041     | 18.754     | 1773    | 2606    | 0.127   |         |
| Total |           |           |            |         | 1635386 | 2055970 | 100.000 |

Operator : \_\_\_\_\_

Date : \_\_\_\_\_

# HPLC REPORT

Compound ID : GK-PD1b1  
 Sample ID : EW20854-57-P1I  
 Filename : D:\DATA\2019\1912\191212\EW20854-57-P1I.lcd  
 Method Name : D:\method\10-80AB\_4min.lcm  
 Instrument & Column : HPLC-R  
 Run time : 2019-12-12 17:30:21

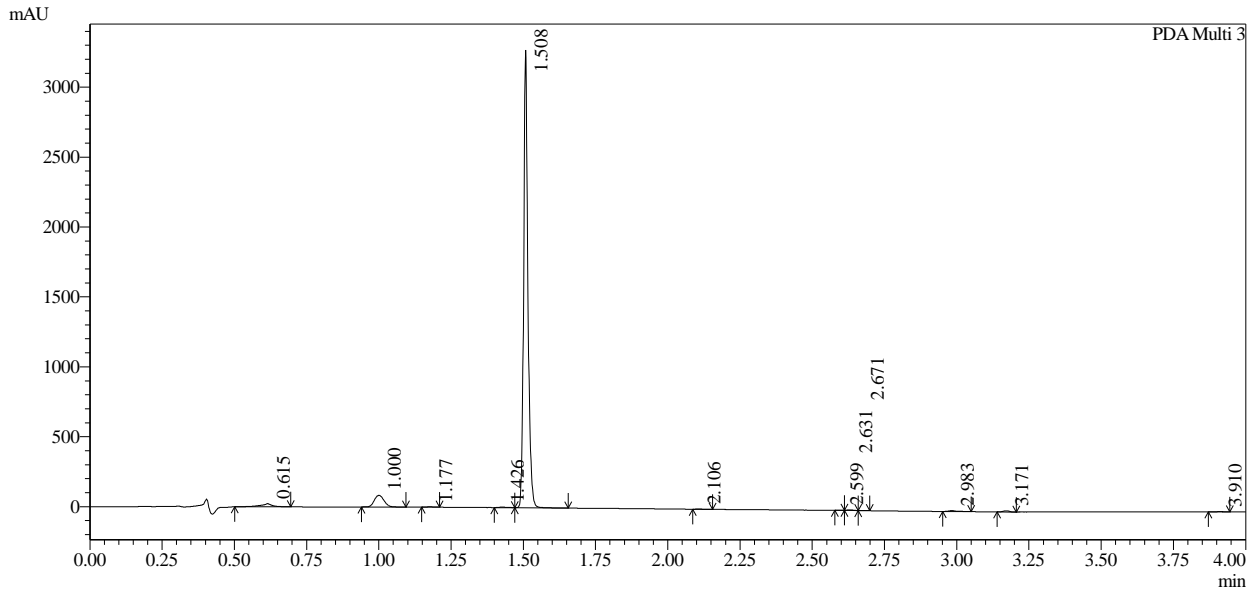

Integration result

PeakTable

PDA Ch3 215nm

| Peak# | Ret. Time | USP Width | Resolution | Height  | Area    | Area %  |
|-------|-----------|-----------|------------|---------|---------|---------|
| 1     | 0.615     | 0.056     | 0.000      | 22423   | 65190   | 1.780   |
| 2     | 1.000     | 0.062     | 6.542      | 83070   | 194355  | 5.306   |
| 3     | 1.177     | 0.045     | 3.321      | 2337    | 3781    | 0.103   |
| 4     | 1.426     | 0.054     | 5.055      | 3909    | 7364    | 0.201   |
| 5     | 1.508     | 0.027     | 2.026      | 3274616 | 3354014 | 91.561  |
| 6     | 2.106     | 0.042     | 17.306     | 1514    | 2252    | 0.061   |
| 7     | 2.599     | 0.056     | 10.027     | 2060    | 2722    | 0.074   |
| 8     | 2.631     | 0.049     | 0.610      | 3630    | 5801    | 0.158   |
| 9     | 2.671     | 0.032     | 0.986      | 1035    | 1213    | 0.033   |
| 10    | 2.983     | 0.043     | 8.347      | 6069    | 11298   | 0.308   |
| 11    | 3.171     | 0.043     | 4.366      | 8718    | 13677   | 0.373   |
| 12    | 3.910     | 0.064     | 13.734     | 581     | 1490    | 0.041   |
| Total |           |           |            | 3409962 | 3663158 | 100.000 |

Operator : \_\_\_\_\_

Date : \_\_\_\_\_

Compound ID: GK-PD1b2

EW20854-45-P1A DMSO Bruker\_G\_400MHz

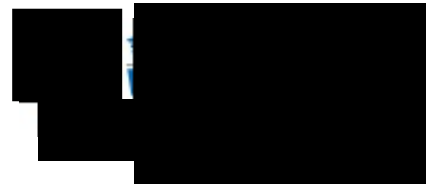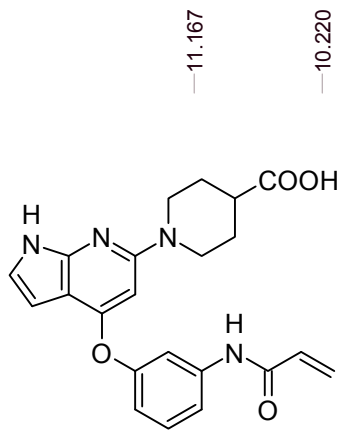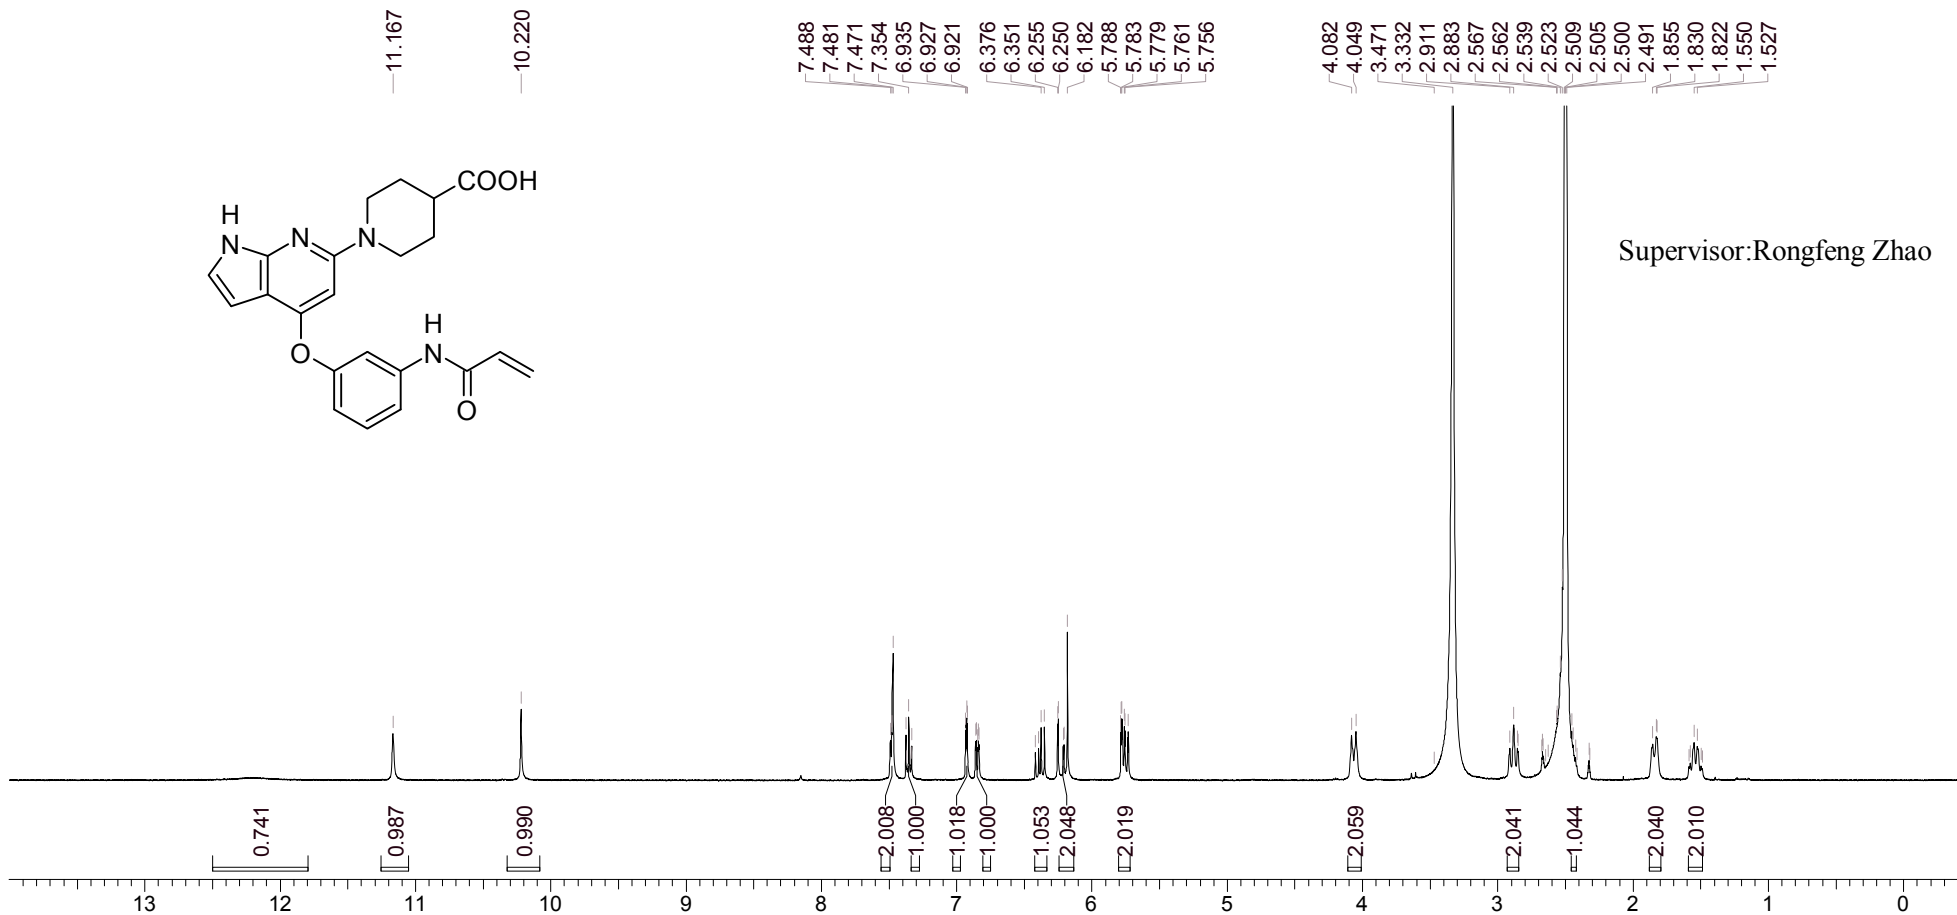

Operator:

Date:

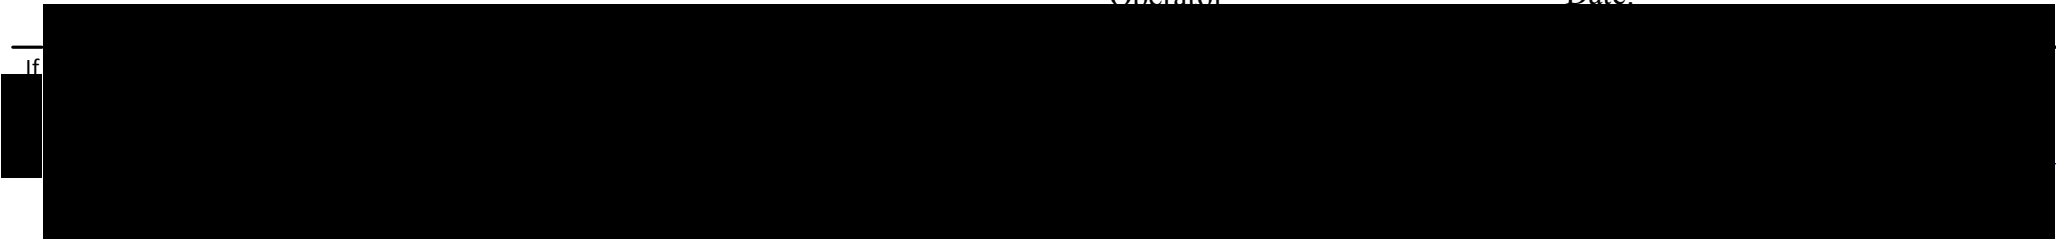

# LCMS REPORT

Compound ID : GK-PD1b2  
 Sample ID : EW20854-45-P1F  
 Injection Vol : 5ul  
 Location : vial101  
 Acq Method : D:\method\0-60CD\_R\_220&254\_POS.lcm  
 Org DataFile : D:\DATA\2019\1911\191118\EW20854-45-P1F.lcd  
 Injection Date : 2019-11-18 11:52:46  
 Instrument : LCMS-M 17-102

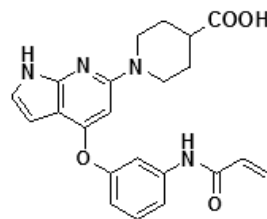

Exact Mass : 406.1641

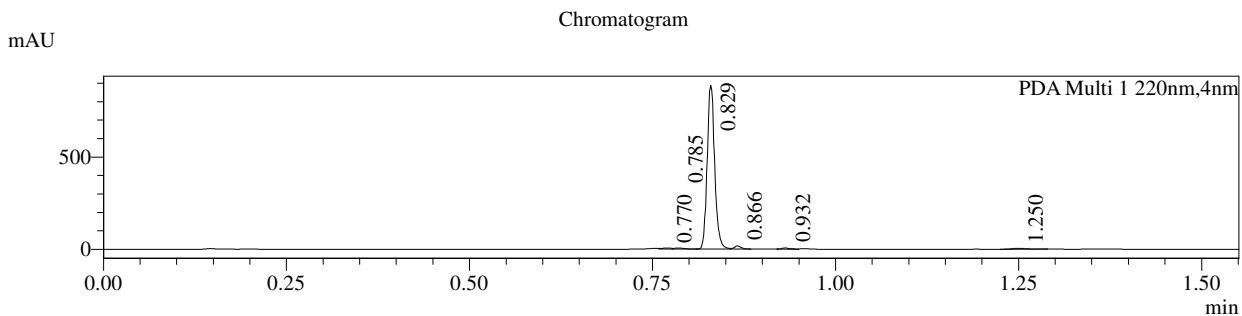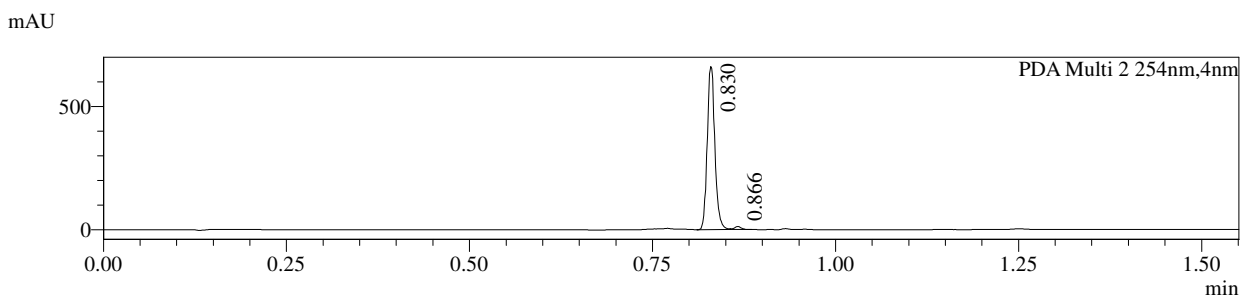

- 1 PDA Multi 1 / 220nm,4nm
- 2 PDA Multi 2 / 254nm,4nm

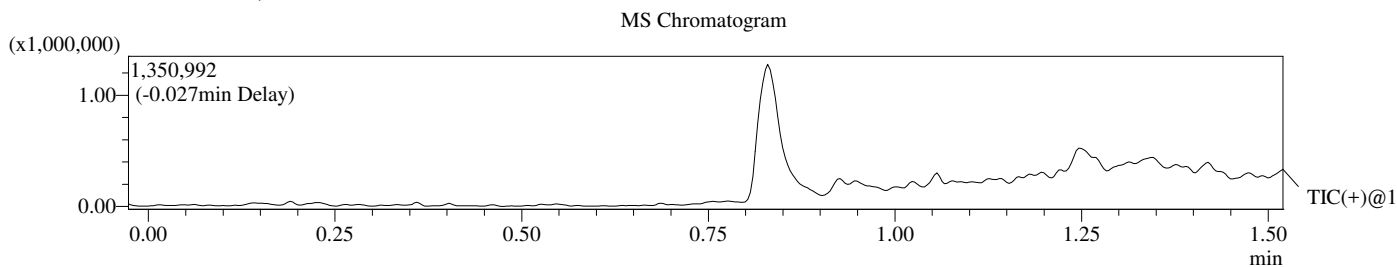

## Integration Result

### Peak Table

PDA Ch1 220nm

| Peak# | Ret. Time | Height | Height% | USP Width | Area   | Area%  |
|-------|-----------|--------|---------|-----------|--------|--------|
| 1     | 0.770     | 6327   | 0.682   | 0.038     | 5427   | 0.830  |
| 2     | 0.785     | 5528   | 0.596   | 0.042     | 5383   | 0.823  |
| 3     | 0.829     | 886663 | 95.598  | 0.021     | 619768 | 94.789 |
| 4     | 0.866     | 16938  | 1.826   | 0.020     | 10890  | 1.665  |
| 5     | 0.932     | 7027   | 0.758   | 0.021     | 5459   | 0.835  |
| 6     | 1.250     | 5008   | 0.540   | 0.037     | 6915   | 1.058  |

### Peak Table

PDA Ch2 254nm

| Peak# | Ret. Time | Height | Height% | USP Width | Area   | Area%  |
|-------|-----------|--------|---------|-----------|--------|--------|
| 1     | 0.830     | 661284 | 98.099  | 0.022     | 469569 | 98.228 |
| 2     | 0.866     | 12816  | 1.901   | 0.019     | 8473   | 1.772  |

Operator: \_\_\_\_\_

Date: \_\_\_\_\_

Mass Spectrum

RefTime: 0.770 Datafile: D:\DATA\2019\1911\191118\EW20854-45-PIF.lcd

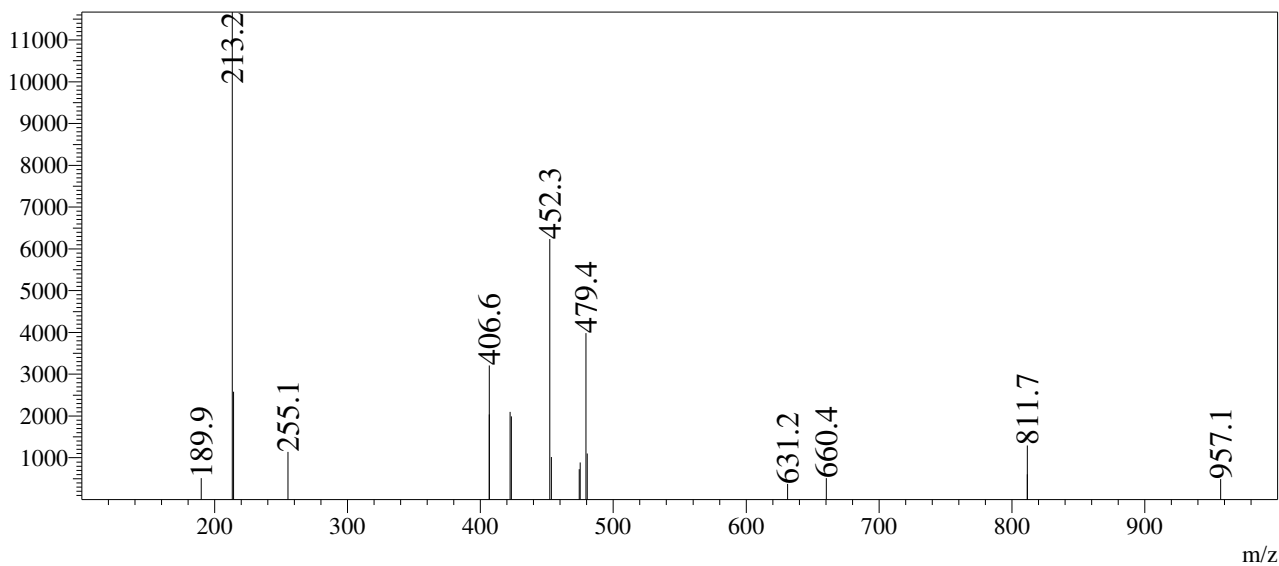

RefTime: 0.786 Datafile: D:\DATA\2019\1911\191118\EW20854-45-PIF.lcd

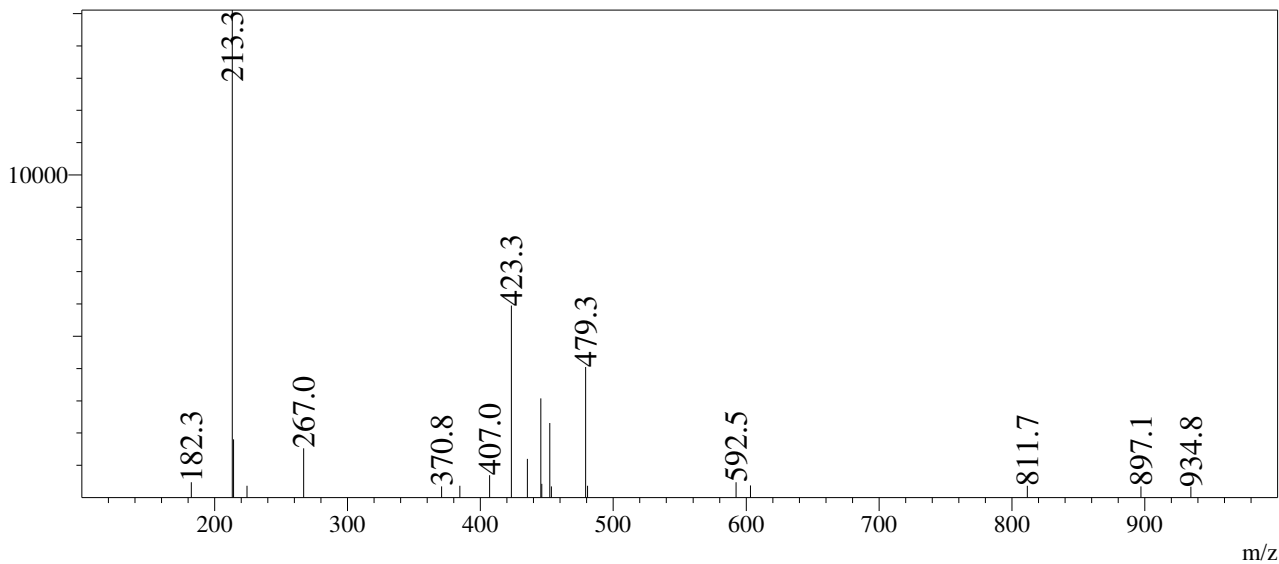

RefTime: 0.830 Datafile: D:\DATA\2019\1911\191118\EW20854-45-PIF.lcd

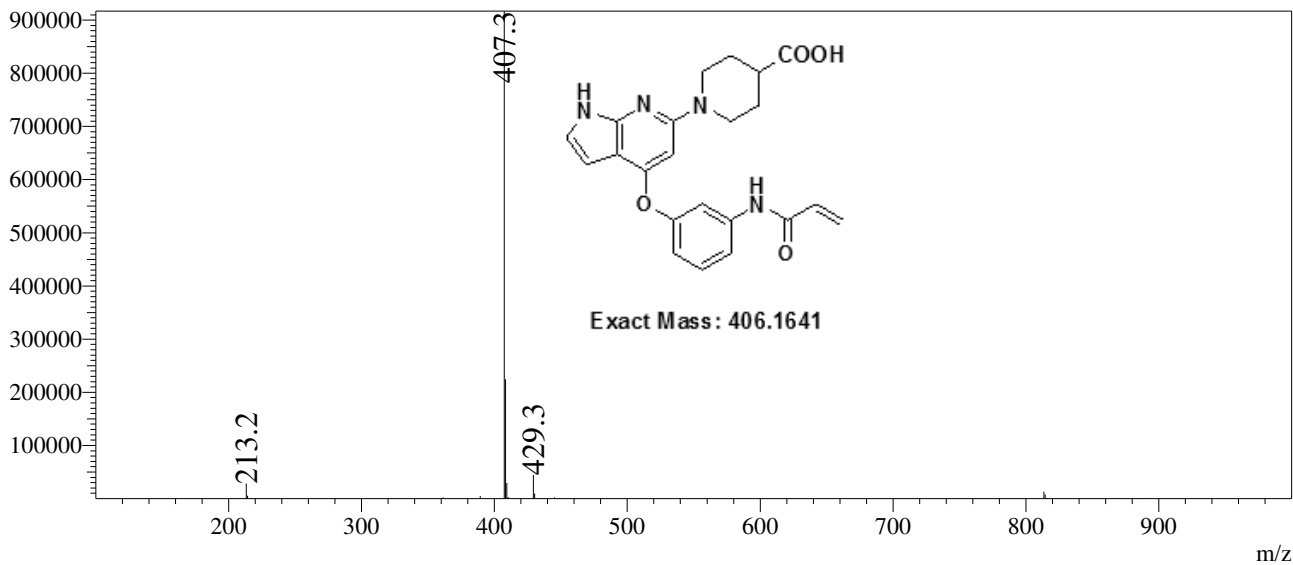

RefTime: 0.866 Datafile: D:\DATA\2019\1911\191118\EW20854-45-PIF.lcd

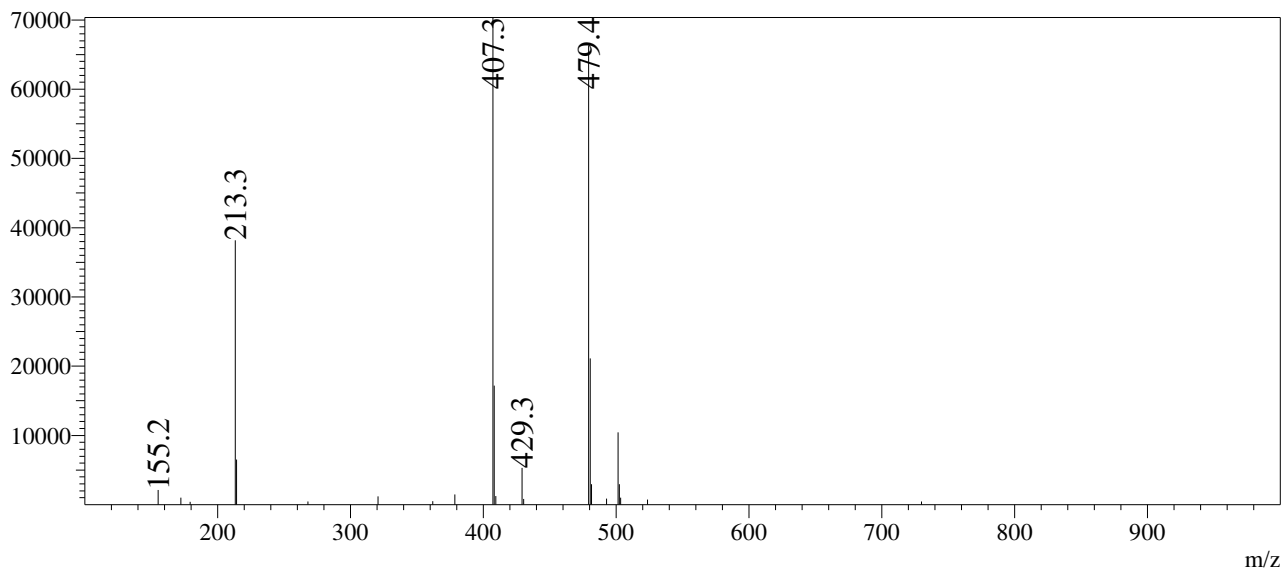

RefTime: 0.933 Datafile: D:\DATA\2019\1911\191118\EW20854-45-PIF.lcd

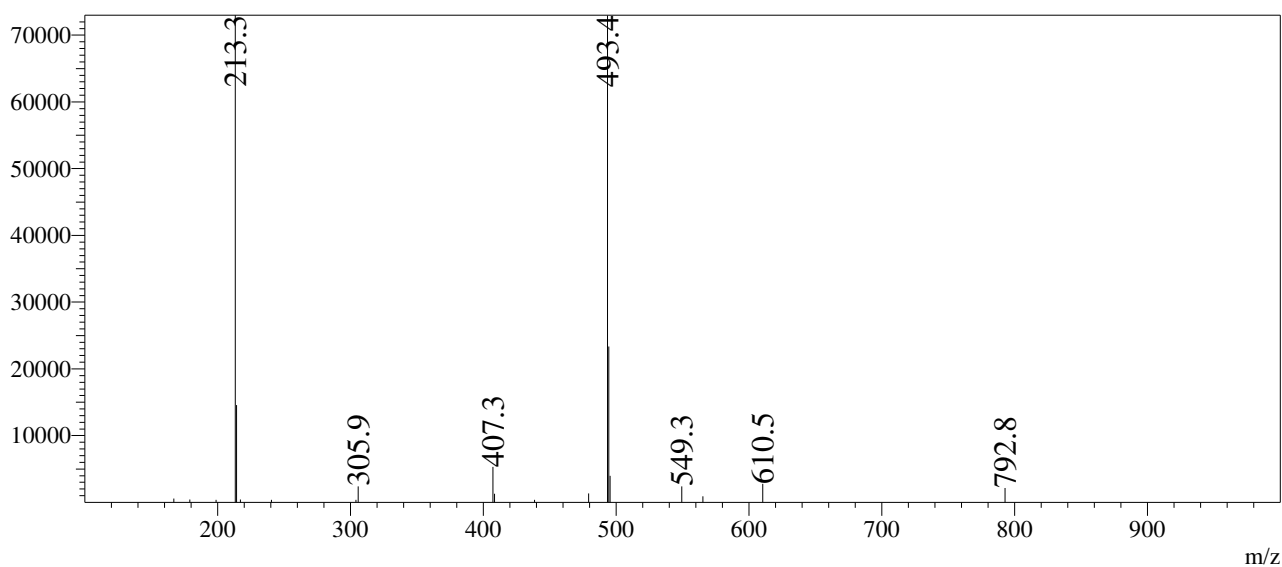

RefTime: 1.250 Datafile: D:\DATA\2019\1911\191118\EW20854-45-PIF.lcd

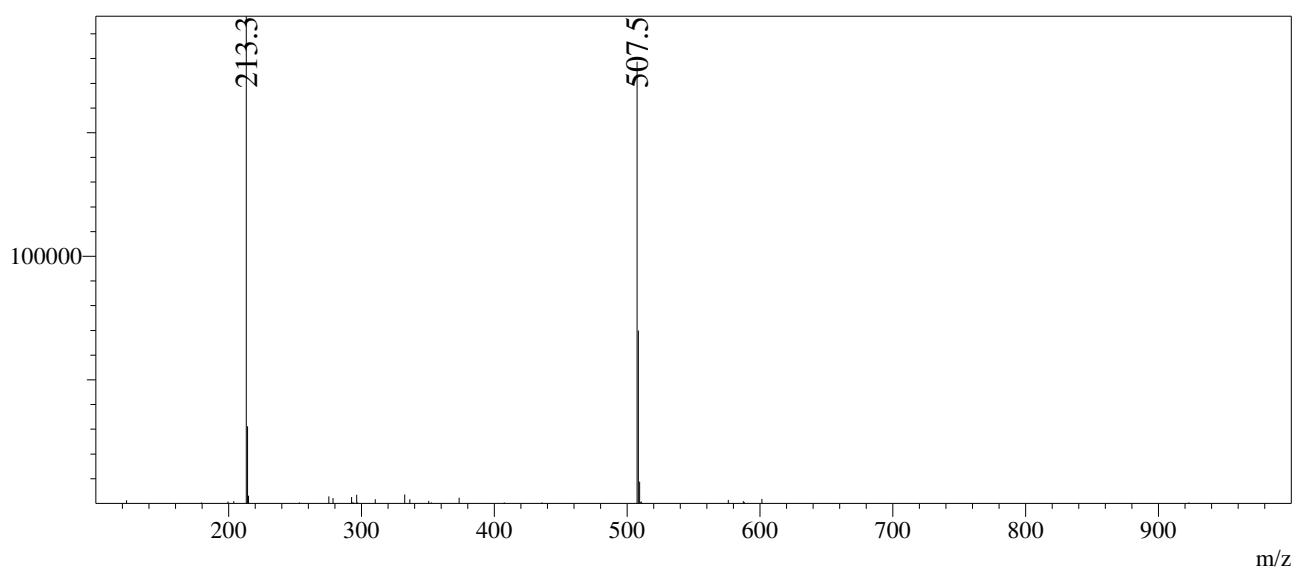



# HPLC REPORT

Compound ID : GK-PD1b2  
 Sample ID : EW20854-45-P1E  
 Vial# : 105  
 Injection Volumn : 5  
 Filename : D:\DATA\2019\1911\191118\EW20854-45-P1E.lcd  
 Method Name : D:\method\0-60CD\_4min.lcm  
 Instrument : HPLC-AG  
 Run time : 2019-11-18 11:49:23

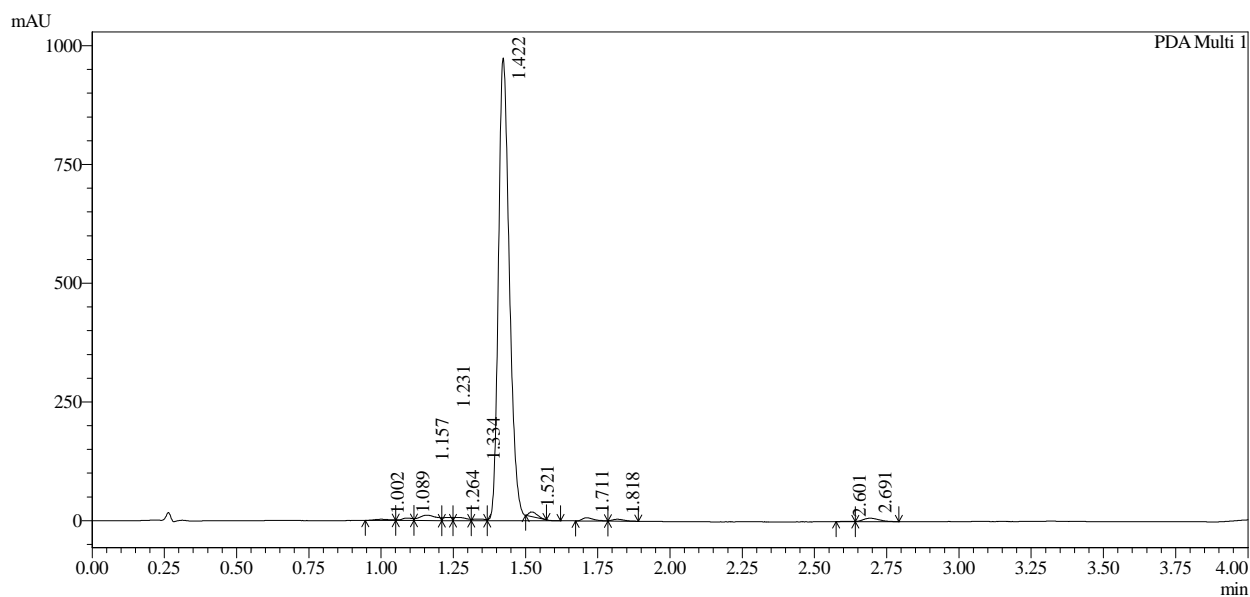

1 PDA Multi 1 / 220nm,4nm

## Integration result

### PeakTable

PDA Ch1 220nm

| Peak# | Ret. Time | USP Width | Resolution | Height  | Area    | Area %  |
|-------|-----------|-----------|------------|---------|---------|---------|
| 1     | 1.002     | 0.112     | 0.000      | 2539    | 9591    | 0.342   |
| 2     | 1.089     | 0.110     | 0.788      | 5201    | 13264   | 0.473   |
| 3     | 1.157     | 0.121     | 0.580      | 11356   | 46565   | 1.661   |
| 4     | 1.231     | 0.443     | 0.266      | 6486    | 14418   | 0.514   |
| 5     | 1.264     | 0.260     | 0.092      | 6714    | 19821   | 0.707   |
| 6     | 1.334     | 0.176     | 0.323      | 3481    | 10262   | 0.366   |
| 7     | 1.422     | 0.070     | 0.711      | 974478  | 2608006 | 93.023  |
| 8     | 1.521     | 0.056     | 1.580      | 9959    | 20677   | 0.738   |
| 9     | 1.711     | 0.073     | 2.934      | 6724    | 19437   | 0.693   |
| 10    | 1.818     | 0.077     | 1.423      | 4060    | 11683   | 0.417   |
| 11    | 2.601     | 0.071     | 10.629     | 659     | 1824    | 0.065   |
| 12    | 2.691     | 0.103     | 1.026      | 7295    | 28077   | 1.001   |
| Total |           |           |            | 1038951 | 2803625 | 100.000 |

Operator : \_\_\_\_\_

Date : \_\_\_\_\_

# HPLC REPORT

Compound ID : GK-PD1b2  
 Sample ID : EW20854-45-P1E  
 Filename : D:\DATA\2019\1911\191118\EW20854-45-P1E.lcd  
 Method Name : D:\method\0-60CD\_4min.lcm  
 Instrument : HPLC-AG  
 Run time : 2019-11-18 11:49:23

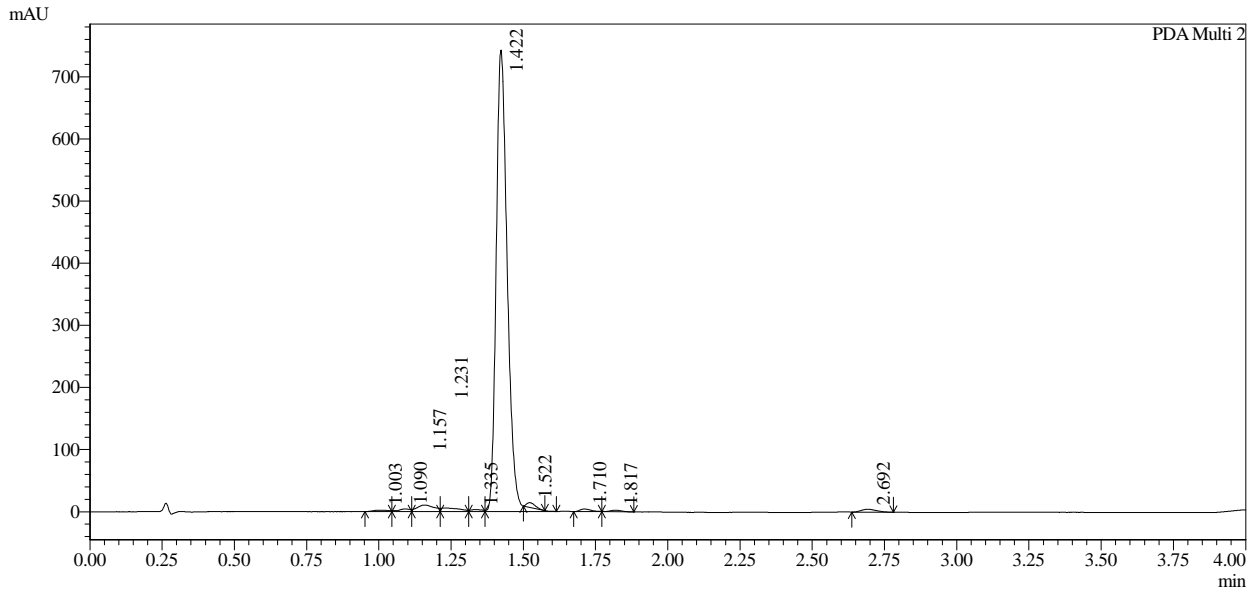

-----  
 Integration result  
 -----

PeakTable

PDA Ch2 254nm

| Peak# | Ret. Time | USP Width | Resolution | Height | Area    | Area %  |
|-------|-----------|-----------|------------|--------|---------|---------|
| 1     | 1.003     | 0.144     | 0.000      | 2321   | 8503    | 0.398   |
| 2     | 1.090     | 0.314     | 0.378      | 4154   | 11872   | 0.555   |
| 3     | 1.157     | 0.123     | 0.306      | 10522  | 43580   | 2.037   |
| 4     | 1.231     | 0.259     | 0.391      | 5811   | 25610   | 1.197   |
| 5     | 1.335     | 0.129     | 0.533      | 3084   | 8824    | 0.413   |
| 6     | 1.422     | 0.070     | 0.879      | 742634 | 1989604 | 93.015  |
| 7     | 1.522     | 0.056     | 1.575      | 7619   | 15893   | 0.743   |
| 8     | 1.710     | 0.070     | 2.987      | 4092   | 11036   | 0.516   |
| 9     | 1.817     | 0.074     | 1.481      | 2560   | 7324    | 0.342   |
| 10    | 2.692     | 0.098     | 10.176     | 4578   | 16774   | 0.784   |
| Total |           |           |            | 787374 | 2139019 | 100.000 |

Operator : \_\_\_\_\_

Date : \_\_\_\_\_

# HPLC REPORT

Compound ID : GK-PD1b2  
 Sample ID : EW20854-45-P1E  
 Filename : D:\DATA\2019\1911\191118\EW20854-45-P1E.lcd  
 Method Name : D:\method\0-60CD\_4min.lcm  
 Instrument : HPLC-AG  
 Run time : 2019-11-18 11:49:23

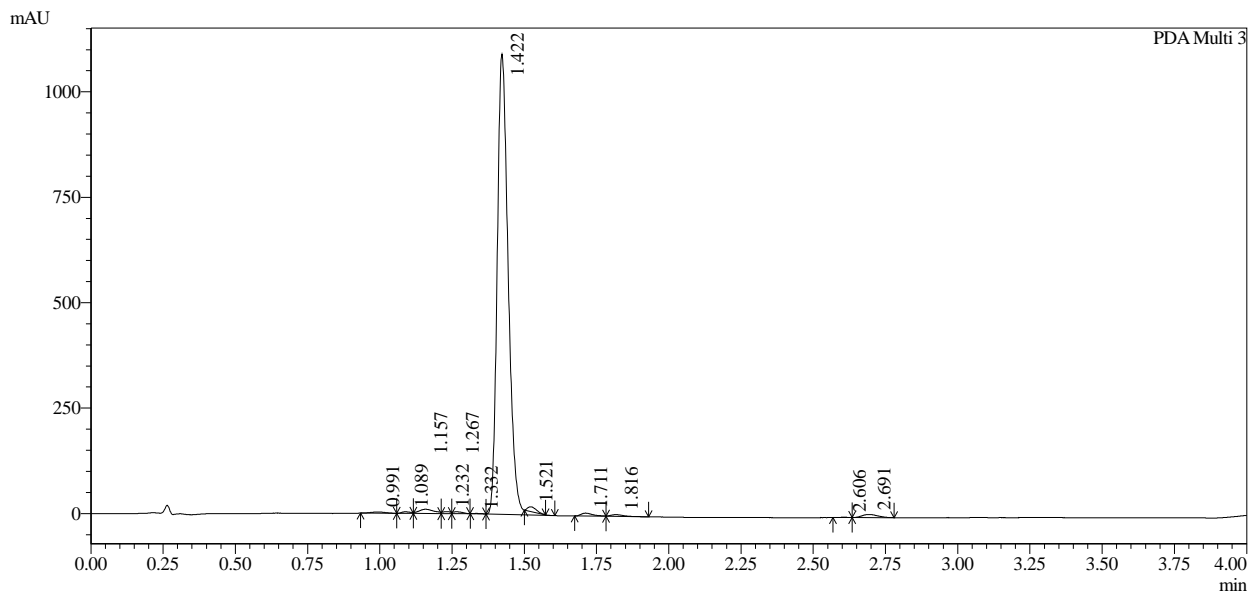

Integration result

PeakTable

PDA Ch3 215nm

| Peak# | Ret. Time | USP Width | Resolution | Height  | Area    | Area %  |
|-------|-----------|-----------|------------|---------|---------|---------|
| 1     | 0.991     | 0.096     | 0.000      | 3084    | 11088   | 0.361   |
| 2     | 1.089     | 0.073     | 1.165      | 3904    | 8695    | 0.283   |
| 3     | 1.157     | 0.102     | 0.775      | 10082   | 37378   | 1.216   |
| 4     | 1.232     | 0.230     | 0.451      | 4453    | 9371    | 0.305   |
| 5     | 1.267     | 0.177     | 0.171      | 4429    | 10679   | 0.348   |
| 6     | 1.332     | 0.048     | 0.578      | 904     | 1548    | 0.050   |
| 7     | 1.422     | 0.070     | 1.532      | 1091644 | 2905647 | 94.558  |
| 8     | 1.521     | 0.056     | 1.575      | 11113   | 23185   | 0.755   |
| 9     | 1.711     | 0.073     | 2.943      | 6972    | 20652   | 0.672   |
| 10    | 1.816     | 0.082     | 1.351      | 4364    | 13969   | 0.455   |
| 11    | 2.606     | 0.070     | 10.427     | 814     | 2064    | 0.067   |
| 12    | 2.691     | 0.102     | 0.987      | 7533    | 28591   | 0.930   |
| Total |           |           |            | 1149297 | 3072866 | 100.000 |

Operator : \_\_\_\_\_

Date : \_\_\_\_\_
